# Supplementary material for: Single-Cell Transcriptomics Reveals Killing Mechanisms of Antitumor Cytotoxic CD4+ TCR-T Cells
Source: Frontiers journal article supplement (doi:10.3389/fimmu.2022.939940), 2022-07-19
Supplement: Table_1.XLS [file Table_1.XLS]

## Sheet: Gene up
CD4+_C4/C9	CD8+_C6/C8	Intersection
LTA	CCL3	IL3
TNFRSF4	CRTAM	CCL1
LMNA	PTGS2	IL13
TNFRSF18	CCL3L1	CSF2
ID2	TIMP1	IER3
IRF4	LIF	IL2
SNHG15	SYTL3	GZMB
NCL	DUSP6	PIM3
MAT2A	CD160	XCL1
VSIR	IL23A	NFKBID
ODC1	SLC29A1	DUSP4
BCL2L11	ZEB2	MYC
TOMM40	XIRP1	CD40LG
INSIG1	SPRY1	GADD45B
MTHFD2	AKR1A1	IFNG
PGAM1	SLC4A7	PHLDA1
CD83	CSF1	RGCC
PKM	EVI2A	DUSP2
DCUN1D5	STARD4	MIR155HG
NOP16	FLT1	BCL2A1
ZNF593	PLPP1	SLC7A5
PPA1	SATB1	SDC4
SRSF7	NCEH1	NFKBIA
CD44	CAMK2D	TNFSF14
NOP58	ADAM19	PRDX1
VASP	SLC35E4	IL2RA
CISD3	TRIB1	FABP5
IFNGR2	ALG2	CCL4
LDHA	TGIF1	SRGN
PLAGL2	GNA15	RILPL2
TBX21	HAVCR2	REL
MRTO4	HEG1	SERPINB9
STAT5A		TRAF4
HSPD1		HSP90AB1
RAN		IL4
SLC27A2		RNF19A
EIF5		TNF
ANXA1		RGS16
SLC1A5		CFLAR
NXT1		MAP2K3
NIFK		NINJ1
HNRNPAB		NR4A3
CCT2		CD82
ADGRE5		TRAF1
SLC3A2		BIRC3
SRM		TNFRSF9
OTUD4		XCL2
MRPL4		NOLC1
GTPBP4		PLK3
IFRD2		SLA
NKG7		ZBED2
FDX1		NAMPT
JUNB		ZBTB32
SIAH2		PRNP
C1QBP		BCL2L1
KLF10		BACH2
BZW1		HSPH1
ITK		ZFP36L1
LYAR		CYTOR
AIMP2		KDM6B
MIR4435-2HG		DDX21
H3F3B		CREM
BZW2		TNFSF8
TNFAIP3		IL21R
GPR183		BATF
DUSP5		SH2D2A
MRPL36		CD69
SMS		MAP3K8
ENO1		IL31
FRMD4B		CDK6
NOP56		FOS
ARFGAP3		TOP1
AMD1		WDR43
SRSF2		FASLG
RHOG		RAB11FIP1
SERBP1		CCL4L2
PHF6		HSPA5
MRPS12		TFRC
ABCE1		EGR2
JARID2		CD55
IL12RB2		AREG
ATP1B3		SFXN1
SNX9		CD200
FOXP1		SOCS1
NFATC1		NR4A2
AGO2		CCND2
HMGCS1		CD70
GADD45G		SLAMF1
DCTPP1		SDCBP
PHLDA2		BTG2
DDX5		NR4A1
PFKP		SEMA7A
CYCS		KDM5B
ICAM1		CSRNP1
ICOS		ETS2
PTP4A3
UFM1
MFSD2A
RANBP1
PPIF
NDFIP1
RIOK1
EBNA1BP2
IL2RB
CKS2
GRPEL1
CD109
POLR1C
TPRG1
EIF1AX
SLC7A1
SLC43A3
HILPDA
SPAG9
TNIP2
GABPB1
HIF1A
ECE1
SYNGR2
GPATCH4
ETF1
USP12
SBDS
FKBP4
MYADM

## Sheet: Gene sets
Gene sets related to T cell functions
Function	Genes
Activation/Exhaustion	BTLA, CTLA4, HAVCR2, LAG3, PDCD1, TIGIT, LAIR1, FASLG, TBX21, PRDM1, IKZF2, ZBTB32, ID2, CD80, CD83, KLRG1, KLRD1, KLRC1
Costimulatory	CD28, ICOS, CD27, TNFRSF14, CD2, CD226, CD40LG, TNFRSF25, TNFRSF18, TNFSF8, TNFRSF9, TNFRSF4, TNFSF4, TNFSF9
Cytotoxicity	CST7, GZMA, GZMB, IFNG, NKG7, PRF1, TNFSF10, KLRG1, FASLG, CCL3, GNLY, KLRB1, GZMM, GZMK, NCR3, CTSW

## Sheet: Pathways related to T cell func
Pathways related to T cell functions
GO ID	Description	Genes
GO:0033209	Tumor necrosis factor-mediated signaling pathway	CD40LG, LTA, NFKBIA, TNFRSF18, TNFRSF4, TRAF1
GO:0002697	Regulation of immune effector process	C1QBP, CD40LG, HSPD1, IRF4, LTA, SERPINB9, TNFRSF4
GO:0051403	Stress-activated MAPK cascade	CD40LG, GADD45B, MAP2K3, MYC, TRAF4
GO:0097191	Extrinsic apoptotic signaling pathway	BCL2A1, BCL2L11, CFLAR, TRAF1
GO:0006730	One-carbon metabolic process	MAT2A, MTHFD2
GO:2001233	Regulation of apoptotic signaling pathway	BCL2A1, BCL2L11, CFLAR, PPIF, TRAF1
GO:0052548	Regulation of endopeptidase activity	BCL2L11, CFLAR, HSPD1, MYC, SERPINB9
GO:0001819	Positive regulation of cytokine production	CCL1, CCL3, CD160, CD200, CRTAM, CSF2, HEG1, IFNG, IL13, IL2, IL4, PTGS2, RGCC, TNF, XCL1
GO:0042531	Positive regulation of tyrosine phosphorylation of STAT protein	CSF2, IFNG, IL13, IL2, IL3, IL4, LIF, TNF
GO:0046427	Positive regulation of JAK-STAT cascade	CSF2, IFNG, IL13, IL2, IL3, IL4, LIF, TNF
GO:0050731	Positive regulation of peptidyl-tyrosine phosphorylation	AREG, CSF2, IFNG, IL13, IL2, IL3, IL4, LIF, TNF
GO:0001906	Cell killing	CD160, CD55, CRTAM, GZMB, IFNG, IL13, IL4, XCL1
GO:0072676	Lymphocyte migration	CCL1, CCL3, CCL3L1, CCL4, CD200, XCL1, XCL2
GO:0070372	Regulation of ERK1 and ERK2 cascade	CCL1, CCL3, CCL3L1, CCL4, DUSP6, LIF, TNF, XCL1, XCL2
GO:0071346	Cellular response to interferon-gamma	CCL1, CCL3, CCL3L1, CCL4, IFNG, XCL1, XCL2
GO:0034612	Response to tumor necrosis factor	CCL1, CCL3, CCL3L1, CCL4, PTGS2, TNF, XCL1, XCL2
GO:0071634	Regulation of transforming growth factor beta production	CD200, IL13, PTGS2, XCL1
GO:0042110	T cell activation	ANXA1, BATF, CD44, CD70, CD83, CDK6, FOXP1, GPR183, HAVCR2, HSPH1, ICAM1, IL23A, IL2RA, ITK, MAP3K8, NFKBID, PRNP, SATB1, SDC4, SOCS1, TBX21, TFRC, TNFSF14, TNFSF8, VSIR, ZFP36L1
GO:0022407	Regulation of cell-cell adhesion	ADAM19, ANXA1, CD44, CD70, CD83, GTPBP4, HAVCR2, HSPH1, ICAM1, IL23A, IL2RA, MAP3K8, MYADM, NFKBID, NR4A3, PRNP, SDC4, SOCS1, TBX21, TFRC, TNFSF14, VSIR
GO:0030217	T cell differentiation	ANXA1, BATF, CD83, CDK6, FOXP1, GPR183, IL23A, IL2RA, ITK, NFKBID, SATB1, SOCS1, TBX21, TNFSF8, VSIR, ZFP36L1
GO:0070661	Leukocyte proliferation	ANXA1, CD70, CSF1, GPR183, HAVCR2, IL23A, IL2RA, PRNP, SATB1, SDC4, TFRC, TNFAIP3, TNFSF14, TNFSF8, VSIR
GO:0019674	NAD metabolic process	ENO1, LDHA, NAMPT, PFKP, PGAM1, PKM
GO:0061621	Canonical glycolysis	ENO1, PFKP, PGAM1, PKM
GO:0001959	Regulation of cytokine-mediated signaling pathway	ABCE1, BIRC3, CSF1, HIF1A, HSP90AB1, OTUD4, SOCS1, TNFAIP3

## Sheet: CD4+_C3_C4_up_go
	ID	Description	GeneRatio	BgRatio	pvalue	p.adjust	qvalue	geneID	Count
GO:0002697	GO:0002697	regulation of immune effector process	15/74	339/18723	3.75936e-12	8.79314e-09	5.69444e-09	TNFRSF4/XCL1/IL2/IL13/IL4/IRF4/SERPINB9/LTA/TNF/CD40LG/NR4A3/DDX21/SLC7A5/NFKBID/IFNG	15
GO:0050863	GO:0050863	regulation of T cell activation	14/74	329/18723	3.58366e-11	3.37586e-08	2.18621e-08	XCL1/IL2/IL4/IRF4/CD40LG/TNFSF8/IL2RA/VSIR/HSPH1/PRNP/SDC4/TNFSF14/NFKBID/IFNG	14
GO:1903037	GO:1903037	regulation of leukocyte cell-cell adhesion	14/74	336/18723	4.73902e-11	3.37586e-08	2.18621e-08	XCL1/IL2/IL4/TNF/CD40LG/NR4A3/IL2RA/VSIR/HSPH1/PRNP/SDC4/TNFSF14/NFKBID/IFNG	14
GO:0042110	GO:0042110	T cell activation	16/74	487/18723	5.77317e-11	3.37586e-08	2.18621e-08	TNFRSF4/XCL1/IL2/IL4/IRF4/CD40LG/TNFSF8/IL2RA/VSIR/HSPH1/ZFP36L1/PRNP/SDC4/TNFSF14/NFKBID/IFNG	16
GO:0002699	GO:0002699	positive regulation of immune effector process	12/74	235/18723	1.27483e-10	5.60536e-08	3.63003e-08	TNFRSF4/XCL1/IL2/IL13/IL4/LTA/TNF/NR4A3/DDX21/SLC7A5/NFKBID/IFNG	12
GO:1903039	GO:1903039	positive regulation of leukocyte cell-cell adhesion	12/74	239/18723	1.5494e-10	5.60536e-08	3.63003e-08	XCL1/IL2/IL4/TNF/CD40LG/NR4A3/IL2RA/VSIR/HSPH1/TNFSF14/NFKBID/IFNG	12
GO:0007159	GO:0007159	leukocyte cell-cell adhesion	14/74	371/18723	1.75161e-10	5.60536e-08	3.63003e-08	XCL1/IL2/IL4/TNF/CD40LG/NR4A3/IL2RA/VSIR/HSPH1/PRNP/SDC4/TNFSF14/NFKBID/IFNG	14
GO:0022407	GO:0022407	regulation of cell-cell adhesion	15/74	448/18723	1.91718e-10	5.60536e-08	3.63003e-08	XCL1/IL2/IL4/TNF/CD40LG/NR4A3/IL2RA/VSIR/HSPH1/RGCC/PRNP/SDC4/TNFSF14/NFKBID/IFNG	15
GO:0042531	GO:0042531	positive regulation of tyrosine phosphorylation of STAT protein	8/74	68/18723	2.46747e-10	6.41269e-08	4.15286e-08	TNFRSF18/IL2/IL3/CSF2/IL13/IL4/TNF/IFNG	8
GO:0001819	GO:0001819	positive regulation of cytokine production	15/74	467/18723	3.40904e-10	7.34704e-08	4.75795e-08	XCL1/IL2/CSF2/IL13/IL4/IRF4/LTA/TNF/CD40LG/NR4A3/DDX21/RGCC/SLC7A5/CCL1/IFNG	15
GO:0042098	GO:0042098	T cell proliferation	11/74	199/18723	3.45521e-10	7.34704e-08	4.75795e-08	TNFRSF4/XCL1/IL2/IL4/CD40LG/TNFSF8/IL2RA/VSIR/PRNP/SDC4/TNFSF14	11
GO:0002700	GO:0002700	regulation of production of molecular mediator of immune response	10/74	164/18723	8.95237e-10	1.71956e-07	1.11359e-07	TNFRSF4/XCL1/IL2/IL13/IL4/TNF/CD40LG/NR4A3/DDX21/SLC7A5	10
GO:0097191	GO:0097191	extrinsic apoptotic signaling pathway	11/74	219/18723	9.5572e-10	1.71956e-07	1.11359e-07	LMNA/BCL2L11/CFLAR/IL2/CSF2/IL4/TNF/TRAF1/BCL2A1/BCL2L1/IFNG	11
GO:0022409	GO:0022409	positive regulation of cell-cell adhesion	12/74	284/18723	1.11807e-09	1.781e-07	1.15338e-07	XCL1/IL2/IL4/TNF/CD40LG/NR4A3/IL2RA/VSIR/HSPH1/TNFSF14/NFKBID/IFNG	12
GO:0050670	GO:0050670	regulation of lymphocyte proliferation	11/74	225/18723	1.27162e-09	1.781e-07	1.15338e-07	TNFRSF4/XCL1/IL2/IL13/IL4/CD40LG/TNFSF8/IL2RA/VSIR/PRNP/SDC4	11
GO:0046651	GO:0046651	lymphocyte proliferation	12/74	288/18723	1.31049e-09	1.781e-07	1.15338e-07	TNFRSF4/XCL1/IL2/IL13/IL4/CD40LG/TNFSF8/IL2RA/VSIR/PRNP/SDC4/TNFSF14	12
GO:0032944	GO:0032944	regulation of mononuclear cell proliferation	11/74	227/18723	1.39604e-09	1.781e-07	1.15338e-07	TNFRSF4/XCL1/IL2/IL13/IL4/CD40LG/TNFSF8/IL2RA/VSIR/PRNP/SDC4	11
GO:0045785	GO:0045785	positive regulation of cell adhesion	14/74	437/18723	1.47323e-09	1.781e-07	1.15338e-07	TNFRSF18/XCL1/IL2/IL4/TNF/CD40LG/NR4A3/IL2RA/VSIR/HSPH1/SDC4/TNFSF14/NFKBID/IFNG	14
GO:0032943	GO:0032943	mononuclear cell proliferation	12/74	291/18723	1.47391e-09	1.781e-07	1.15338e-07	TNFRSF4/XCL1/IL2/IL13/IL4/CD40LG/TNFSF8/IL2RA/VSIR/PRNP/SDC4/TNFSF14	12
GO:0042509	GO:0042509	regulation of tyrosine phosphorylation of STAT protein	8/74	85/18723	1.52287e-09	1.781e-07	1.15338e-07	TNFRSF18/IL2/IL3/CSF2/IL13/IL4/TNF/IFNG	8
GO:0007260	GO:0007260	tyrosine phosphorylation of STAT protein	8/74	88/18723	2.01493e-09	2.24424e-07	1.45337e-07	TNFRSF18/IL2/IL3/CSF2/IL13/IL4/TNF/IFNG	8
GO:0070663	GO:0070663	regulation of leukocyte proliferation	11/74	245/18723	3.11245e-09	3.3091e-07	2.14298e-07	TNFRSF4/XCL1/IL2/IL13/IL4/CD40LG/TNFSF8/IL2RA/VSIR/PRNP/SDC4	11
GO:0070661	GO:0070661	leukocyte proliferation	12/74	318/18723	4.01071e-09	4.07872e-07	2.64138e-07	TNFRSF4/XCL1/IL2/IL13/IL4/CD40LG/TNFSF8/IL2RA/VSIR/PRNP/SDC4/TNFSF14	12
GO:0038034	GO:0038034	signal transduction in absence of ligand	7/74	65/18723	6.53388e-09	6.0057e-07	3.88929e-07	BCL2L11/IL2/CSF2/IL4/TNF/BCL2A1/BCL2L1	7
GO:0097192	GO:0097192	extrinsic apoptotic signaling pathway in absence of ligand	7/74	65/18723	6.53388e-09	6.0057e-07	3.88929e-07	BCL2L11/IL2/CSF2/IL4/TNF/BCL2A1/BCL2L1	7
GO:0002696	GO:0002696	positive regulation of leukocyte activation	13/74	409/18723	6.67585e-09	6.0057e-07	3.88929e-07	TNFRSF4/XCL1/IL2/IL13/IL4/CD40LG/NR4A3/IL2RA/VSIR/HSPH1/TNFSF14/NFKBID/IFNG	13
GO:0046634	GO:0046634	regulation of alpha-beta T cell activation	8/74	104/18723	7.67852e-09	6.65188e-07	4.30776e-07	XCL1/IL2/IL4/IRF4/VSIR/HSPH1/NFKBID/IFNG	8
GO:2000514	GO:2000514	regulation of CD4-positive, alpha-beta T cell activation	7/74	67/18723	8.11077e-09	6.77539e-07	4.38774e-07	XCL1/IL2/IL4/IRF4/VSIR/NFKBID/IFNG	7
GO:0050867	GO:0050867	positive regulation of cell activation	13/74	420/18723	9.15969e-09	7.38776e-07	4.78432e-07	TNFRSF4/XCL1/IL2/IL13/IL4/CD40LG/NR4A3/IL2RA/VSIR/HSPH1/TNFSF14/NFKBID/IFNG	13
GO:0046631	GO:0046631	alpha-beta T cell activation	9/74	156/18723	1.06863e-08	8.00975e-07	5.18712e-07	XCL1/IL2/IL4/IRF4/TNFSF8/VSIR/HSPH1/NFKBID/IFNG	9
GO:1903131	GO:1903131	mononuclear cell differentiation	13/74	426/18723	1.08422e-08	8.00975e-07	5.18712e-07	ID2/IL2/CSF2/IL4/IRF4/CD40LG/MYC/TNFSF8/IL2RA/VSIR/ZFP36L1/NFKBID/IFNG	13
GO:1902107	GO:1902107	positive regulation of leukocyte differentiation	9/74	157/18723	1.13006e-08	8.00975e-07	5.18712e-07	ID2/IL2/IL4/TNF/IL2RA/VSIR/ZFP36L1/NFKBID/IFNG	9
GO:1903708	GO:1903708	positive regulation of hemopoiesis	9/74	157/18723	1.13006e-08	8.00975e-07	5.18712e-07	ID2/IL2/IL4/TNF/IL2RA/VSIR/ZFP36L1/NFKBID/IFNG	9
GO:1902105	GO:1902105	regulation of leukocyte differentiation	11/74	279/18723	1.20278e-08	8.27445e-07	5.35854e-07	ID2/IL2/IL4/IRF4/TNF/MYC/IL2RA/VSIR/ZFP36L1/NFKBID/IFNG	11
GO:0050870	GO:0050870	positive regulation of T cell activation	10/74	216/18723	1.27979e-08	8.55267e-07	5.53871e-07	XCL1/IL2/IL4/CD40LG/IL2RA/VSIR/HSPH1/TNFSF14/NFKBID/IFNG	10
GO:0002637	GO:0002637	regulation of immunoglobulin production	7/74	73/18723	1.49128e-08	9.68918e-07	6.27471e-07	TNFRSF4/XCL1/IL2/IL13/IL4/TNF/CD40LG	7
GO:0051251	GO:0051251	positive regulation of lymphocyte activation	12/74	362/18723	1.70096e-08	1.07528e-06	6.96353e-07	TNFRSF4/XCL1/IL2/IL13/IL4/CD40LG/IL2RA/VSIR/HSPH1/TNFSF14/NFKBID/IFNG	12
GO:0032620	GO:0032620	interleukin-17 production	6/74	44/18723	1.94303e-08	1.1293e-06	7.31336e-07	IL2/VSIR/SLC7A5/CCL1/PRNP/IFNG	6
GO:0032660	GO:0032660	regulation of interleukin-17 production	6/74	44/18723	1.94303e-08	1.1293e-06	7.31336e-07	IL2/VSIR/SLC7A5/CCL1/PRNP/IFNG	6
GO:0002702	GO:0002702	positive regulation of production of molecular mediator of immune response	8/74	117/18723	1.95151e-08	1.1293e-06	7.31336e-07	TNFRSF4/XCL1/IL2/IL13/IL4/NR4A3/DDX21/SLC7A5	8
GO:1903706	GO:1903706	regulation of hemopoiesis	12/74	367/18723	1.97954e-08	1.1293e-06	7.31336e-07	ID2/IL2/IL4/IRF4/TNF/MYC/IL2RA/VSIR/NFKBIA/ZFP36L1/NFKBID/IFNG	12
GO:0071356	GO:0071356	cellular response to tumor necrosis factor	10/74	229/18723	2.23143e-08	1.24269e-06	8.04769e-07	TNFRSF18/TNFRSF4/XCL1/TNF/TRAF1/BIRC3/NFKBIA/ZFP36L1/CCL1/CCL4	10
GO:0042129	GO:0042129	regulation of T cell proliferation	9/74	171/18723	2.37868e-08	1.29389e-06	8.37924e-07	XCL1/IL2/IL4/CD40LG/TNFSF8/IL2RA/VSIR/PRNP/SDC4	9
GO:1904019	GO:1904019	epithelial cell apoptotic process	8/74	121/18723	2.54271e-08	1.35168e-06	8.75349e-07	CFLAR/IL13/IL4/TNF/CD40LG/RGCC/ZFP36L1/BCL2L1	8
GO:0045619	GO:0045619	regulation of lymphocyte differentiation	9/74	174/18723	2.76602e-08	1.43771e-06	9.31064e-07	ID2/IL2/IL4/IRF4/IL2RA/VSIR/ZFP36L1/NFKBID/IFNG	9
GO:0050727	GO:0050727	regulation of inflammatory response	12/74	386/18723	3.45136e-08	1.75494e-06	1.1365e-06	XCL1/IL2/IL13/IL4/LTA/TNF/NINJ1/BIRC3/IL2RA/NFKBIA/CCL1/IFNG	12
GO:0001906	GO:0001906	cell killing	9/74	188/18723	5.39703e-08	2.68589e-06	1.73938e-06	PRDX1/XCL1/IL13/IL4/SERPINB9/HSP90AB1/GZMB/BCL2L1/IFNG	9
GO:0034612	GO:0034612	response to tumor necrosis factor	10/74	253/18723	5.71652e-08	2.78561e-06	1.80396e-06	TNFRSF18/TNFRSF4/XCL1/TNF/TRAF1/BIRC3/NFKBIA/ZFP36L1/CCL1/CCL4	10
GO:0050731	GO:0050731	positive regulation of peptidyl-tyrosine phosphorylation	9/74	193/18723	6.76322e-08	3.2284e-06	2.09071e-06	TNFRSF18/IL2/IL3/CSF2/IL13/IL4/TNF/PRNP/IFNG	9
GO:1904035	GO:1904035	regulation of epithelial cell apoptotic process	7/74	96/18723	1.01499e-07	4.74814e-06	3.0749e-06	CFLAR/IL13/IL4/TNF/CD40LG/RGCC/ZFP36L1	7
GO:0031341	GO:0031341	regulation of cell killing	7/74	99/18723	1.25585e-07	5.75969e-06	3.72998e-06	XCL1/IL13/IL4/SERPINB9/HSP90AB1/BCL2L1/IFNG	7
GO:0002443	GO:0002443	leukocyte mediated immunity	12/74	440/18723	1.43537e-07	6.45639e-06	4.18116e-06	PRDX1/XCL1/IL2/IL13/IL4/SERPINB9/LTA/TNF/CD40LG/NR4A3/DDX21/GZMB	12
GO:0001818	GO:0001818	negative regulation of cytokine production	11/74	357/18723	1.48416e-07	6.54993e-06	4.24173e-06	XCL1/REL/IL13/IL4/TNF/HSP90AB1/SRGN/VSIR/RGCC/PRNP/IFNG	11
GO:0035710	GO:0035710	CD4-positive, alpha-beta T cell activation	7/74	102/18723	1.54326e-07	6.68209e-06	4.32732e-06	XCL1/IL2/IL4/IRF4/VSIR/NFKBID/IFNG	7
GO:0032613	GO:0032613	interleukin-10 production	6/74	62/18723	1.59982e-07	6.68209e-06	4.32732e-06	XCL1/IL13/IL4/IRF4/CD40LG/VSIR	6
GO:0032653	GO:0032653	regulation of interleukin-10 production	6/74	62/18723	1.59982e-07	6.68209e-06	4.32732e-06	XCL1/IL13/IL4/IRF4/CD40LG/VSIR	6
GO:0051250	GO:0051250	negative regulation of lymphocyte activation	8/74	157/18723	1.92753e-07	7.90965e-06	5.12229e-06	XCL1/ID2/IL2/IL4/IL2RA/VSIR/PRNP/SDC4	8
GO:0030098	GO:0030098	lymphocyte differentiation	11/74	374/18723	2.36478e-07	9.53659e-06	6.1759e-06	ID2/IL2/IL4/IRF4/CD40LG/TNFSF8/IL2RA/VSIR/ZFP36L1/NFKBID/IFNG	11
GO:0032609	GO:0032609	interferon-gamma production	7/74	112/18723	2.93406e-07	1.14379e-05	7.40721e-06	XCL1/IL2/LTA/TNF/VSIR/SLC7A5/PRNP	7
GO:0032649	GO:0032649	regulation of interferon-gamma production	7/74	112/18723	2.93406e-07	1.14379e-05	7.40721e-06	XCL1/IL2/LTA/TNF/VSIR/SLC7A5/PRNP	7
GO:0019221	GO:0019221	cytokine-mediated signaling pathway	12/74	472/18723	3.04927e-07	1.16922e-05	7.57187e-06	TNFRSF18/TNFRSF4/XCL1/TNF/HSP90AB1/TRAF1/BIRC3/IL2RA/NFKBIA/CCL1/IFNG/CCL4	12
GO:0007259	GO:0007259	receptor signaling pathway via JAK-STAT	8/74	170/18723	3.54619e-07	1.31958e-05	8.5456e-06	TNFRSF18/IL2/IL3/CSF2/IL13/IL4/TNF/IFNG	8
GO:0002440	GO:0002440	production of molecular mediator of immune response	10/74	308/18723	3.55423e-07	1.31958e-05	8.5456e-06	TNFRSF4/XCL1/IL2/IL13/IL4/TNF/CD40LG/NR4A3/DDX21/SLC7A5	10
GO:0002714	GO:0002714	positive regulation of B cell mediated immunity	5/74	40/18723	4.96704e-07	1.78737e-05	1.1575e-05	XCL1/IL2/IL4/LTA/TNF	5
GO:0002891	GO:0002891	positive regulation of immunoglobulin mediated immune response	5/74	40/18723	4.96704e-07	1.78737e-05	1.1575e-05	XCL1/IL2/IL4/LTA/TNF	5
GO:0050868	GO:0050868	negative regulation of T cell activation	7/74	122/18723	5.25746e-07	1.86321e-05	1.20662e-05	XCL1/IL2/IL4/IL2RA/VSIR/PRNP/SDC4	7
GO:0032733	GO:0032733	positive regulation of interleukin-10 production	5/74	41/18723	5.63956e-07	1.96599e-05	1.27317e-05	XCL1/IL13/IL4/IRF4/CD40LG	5
GO:0097696	GO:0097696	receptor signaling pathway via STAT	8/74	181/18723	5.71557e-07	1.96599e-05	1.27317e-05	TNFRSF18/IL2/IL3/CSF2/IL13/IL4/TNF/IFNG	8
GO:0002695	GO:0002695	negative regulation of leukocyte activation	8/74	187/18723	7.31794e-07	2.48068e-05	1.60649e-05	XCL1/ID2/IL2/IL4/IL2RA/VSIR/PRNP/SDC4	8
GO:0030217	GO:0030217	T cell differentiation	9/74	257/18723	7.63736e-07	2.55197e-05	1.65266e-05	IL2/IL4/IRF4/TNFSF8/IL2RA/VSIR/ZFP36L1/NFKBID/IFNG	9
GO:0050672	GO:0050672	negative regulation of lymphocyte proliferation	6/74	83/18723	9.20075e-07	3.03107e-05	1.96292e-05	XCL1/IL2/IL2RA/VSIR/PRNP/SDC4	6
GO:0050730	GO:0050730	regulation of peptidyl-tyrosine phosphorylation	9/74	264/18723	9.55162e-07	3.10295e-05	2.00947e-05	TNFRSF18/IL2/IL3/CSF2/IL13/IL4/TNF/PRNP/IFNG	9
GO:0032945	GO:0032945	negative regulation of mononuclear cell proliferation	6/74	84/18723	9.8777e-07	3.16492e-05	2.0496e-05	XCL1/IL2/IL2RA/VSIR/PRNP/SDC4	6
GO:0002683	GO:0002683	negative regulation of immune system process	11/74	434/18723	1.02855e-06	3.25105e-05	2.10538e-05	XCL1/ID2/IL2/IL4/SERPINB9/TNF/MYC/IL2RA/VSIR/PRNP/SDC4	11
GO:0022408	GO:0022408	negative regulation of cell-cell adhesion	8/74	196/18723	1.04348e-06	3.25427e-05	2.10747e-05	XCL1/IL2/IL4/IL2RA/VSIR/RGCC/PRNP/SDC4	8
GO:0001774	GO:0001774	microglial cell activation	5/74	47/18723	1.13328e-06	3.48782e-05	2.25871e-05	IL13/IL4/TNF/NAMPT/IFNG	5
GO:0050671	GO:0050671	positive regulation of lymphocyte proliferation	7/74	137/18723	1.15172e-06	3.49853e-05	2.26565e-05	TNFRSF4/XCL1/IL2/IL13/IL4/CD40LG/IL2RA	7
GO:0032946	GO:0032946	positive regulation of mononuclear cell proliferation	7/74	138/18723	1.20946e-06	3.62683e-05	2.34874e-05	TNFRSF4/XCL1/IL2/IL13/IL4/CD40LG/IL2RA	7
GO:1903038	GO:1903038	negative regulation of leukocyte cell-cell adhesion	7/74	141/18723	1.39746e-06	4.13753e-05	2.67947e-05	XCL1/IL2/IL4/IL2RA/VSIR/PRNP/SDC4	7
GO:0050729	GO:0050729	positive regulation of inflammatory response	7/74	142/18723	1.46532e-06	4.28422e-05	2.77446e-05	IL2/LTA/TNF/NINJ1/NFKBIA/CCL1/IFNG	7
GO:0070664	GO:0070664	negative regulation of leukocyte proliferation	6/74	90/18723	1.48498e-06	4.28811e-05	2.77698e-05	XCL1/IL2/IL2RA/VSIR/PRNP/SDC4	6
GO:0070997	GO:0070997	neuron death	10/74	361/18723	1.5054e-06	4.29407e-05	2.78084e-05	REL/BCL2L11/IL13/TNF/HSP90AB1/NAMPT/NR4A3/PRNP/BCL2L1/IFNG	10
GO:0038061	GO:0038061	NIK/NF-kappaB signaling	7/74	143/18723	1.53591e-06	4.31878e-05	2.79684e-05	PRDX1/REL/TNF/BIRC3/NFKBIA/TRAF4/TNFSF14	7
GO:0002639	GO:0002639	positive regulation of immunoglobulin production	5/74	50/18723	1.55099e-06	4.31878e-05	2.79684e-05	TNFRSF4/XCL1/IL2/IL13/IL4	5
GO:0045582	GO:0045582	positive regulation of T cell differentiation	6/74	91/18723	1.58486e-06	4.36116e-05	2.82429e-05	IL2/IL4/IL2RA/VSIR/NFKBID/IFNG	6
GO:0002573	GO:0002573	myeloid leukocyte differentiation	8/74	208/18723	1.63017e-06	4.43367e-05	2.87125e-05	ID2/CSF2/IL4/IRF4/TNF/MYC/ZFP36L1/IFNG	8
GO:0043370	GO:0043370	regulation of CD4-positive, alpha-beta T cell differentiation	5/74	51/18723	1.71431e-06	4.60893e-05	2.98474e-05	IL2/IL4/IRF4/NFKBID/IFNG	5
GO:0050866	GO:0050866	negative regulation of cell activation	8/74	210/18723	1.75113e-06	4.63865e-05	3.00399e-05	XCL1/ID2/IL2/IL4/IL2RA/VSIR/PRNP/SDC4	8
GO:0045580	GO:0045580	regulation of T cell differentiation	7/74	146/18723	1.76503e-06	4.63865e-05	3.00399e-05	IL2/IL4/IRF4/IL2RA/VSIR/NFKBID/IFNG	7
GO:0070665	GO:0070665	positive regulation of leukocyte proliferation	7/74	150/18723	2.11441e-06	5.44336e-05	3.52512e-05	TNFRSF4/XCL1/IL2/IL13/IL4/CD40LG/IL2RA	7
GO:0018108	GO:0018108	peptidyl-tyrosine phosphorylation	10/74	375/18723	2.11777e-06	5.44336e-05	3.52512e-05	TNFRSF18/IL2/IL3/CSF2/IL13/IL4/TNF/MAP2K3/PRNP/IFNG	10
GO:0002718	GO:0002718	regulation of cytokine production involved in immune response	6/74	96/18723	2.17015e-06	5.51738e-05	3.57306e-05	XCL1/IL4/TNF/NR4A3/DDX21/SLC7A5	6
GO:2001236	GO:2001236	regulation of extrinsic apoptotic signaling pathway	7/74	151/18723	2.21026e-06	5.55892e-05	3.59995e-05	LMNA/CFLAR/CSF2/IL4/TNF/TRAF1/BCL2L1	7
GO:0018212	GO:0018212	peptidyl-tyrosine modification	10/74	378/18723	2.27414e-06	5.65874e-05	3.6646e-05	TNFRSF18/IL2/IL3/CSF2/IL13/IL4/TNF/MAP2K3/PRNP/IFNG	10
GO:2001237	GO:2001237	negative regulation of extrinsic apoptotic signaling pathway	6/74	97/18723	2.30605e-06	5.67774e-05	3.67691e-05	LMNA/CFLAR/CSF2/IL4/TNF/BCL2L1	6
GO:0002367	GO:0002367	cytokine production involved in immune response	6/74	98/18723	2.44881e-06	5.96643e-05	3.86386e-05	XCL1/IL4/TNF/NR4A3/DDX21/SLC7A5	6
GO:0033209	GO:0033209	tumor necrosis factor-mediated signaling pathway	6/74	99/18723	2.5987e-06	6.26634e-05	4.05808e-05	TNFRSF18/TNFRSF4/TNF/TRAF1/BIRC3/NFKBIA	6
GO:0002274	GO:0002274	myeloid leukocyte activation	8/74	223/18723	2.73975e-06	6.53907e-05	4.2347e-05	CSF2/IL13/IL4/IRF4/TNF/NAMPT/NR4A3/IFNG	8
GO:0002703	GO:0002703	regulation of leukocyte mediated immunity	8/74	226/18723	3.02541e-06	7.14792e-05	4.629e-05	XCL1/IL2/IL13/IL4/SERPINB9/LTA/TNF/DDX21	8
GO:0036294	GO:0036294	cellular response to decreased oxygen levels	7/74	161/18723	3.38555e-06	7.91881e-05	5.12822e-05	PLK3/LMNA/CFLAR/NAMPT/MYC/RGCC/ZFP36L1	7
GO:0045621	GO:0045621	positive regulation of lymphocyte differentiation	6/74	104/18723	3.46472e-06	8.02374e-05	5.19617e-05	IL2/IL4/IL2RA/VSIR/NFKBID/IFNG	6
GO:2000351	GO:2000351	regulation of endothelial cell apoptotic process	5/74	59/18723	3.56495e-06	8.17491e-05	5.29407e-05	IL13/IL4/TNF/CD40LG/RGCC	5
GO:0042116	GO:0042116	macrophage activation	6/74	106/18723	3.87101e-06	8.63673e-05	5.59315e-05	CSF2/IL13/IL4/TNF/NAMPT/IFNG	6
GO:0002712	GO:0002712	regulation of B cell mediated immunity	5/74	60/18723	3.87711e-06	8.63673e-05	5.59315e-05	XCL1/IL2/IL4/LTA/TNF	5
GO:0002889	GO:0002889	regulation of immunoglobulin mediated immune response	5/74	60/18723	3.87711e-06	8.63673e-05	5.59315e-05	XCL1/IL2/IL4/LTA/TNF	5
GO:0002824	GO:0002824	positive regulation of adaptive immune response based on somatic recombination of immune receptors built from immunoglobulin superfamily domains	6/74	107/18723	4.08823e-06	9.0211e-05	5.84207e-05	XCL1/IL2/IL4/LTA/TNF/NFKBID	6
GO:0031342	GO:0031342	negative regulation of cell killing	4/74	28/18723	4.28359e-06	9.36384e-05	6.06402e-05	IL13/IL4/SERPINB9/HSP90AB1	4
GO:1901214	GO:1901214	regulation of neuron death	9/74	319/18723	4.51951e-06	9.78808e-05	6.33876e-05	REL/BCL2L11/IL13/TNF/HSP90AB1/NR4A3/PRNP/BCL2L1/IFNG	9
GO:0051403	GO:0051403	stress-activated MAPK cascade	8/74	239/18723	4.57449e-06	9.81627e-05	6.35702e-05	PRDX1/TNF/MYC/TRAF1/ZFP36L1/MAP2K3/TRAF4/GADD45B	8
GO:0072539	GO:0072539	T-helper 17 cell differentiation	4/74	29/18723	4.95412e-06	0.000105343	6.82199e-05	IL2/IL4/IRF4/NFKBID	4
GO:0002821	GO:0002821	positive regulation of adaptive immune response	6/74	112/18723	5.32838e-06	0.000111277	7.20633e-05	XCL1/IL2/IL4/LTA/TNF/NFKBID	6
GO:0046632	GO:0046632	alpha-beta T cell differentiation	6/74	112/18723	5.32838e-06	0.000111277	7.20633e-05	IL2/IL4/IRF4/TNFSF8/NFKBID/IFNG	6
GO:0002720	GO:0002720	positive regulation of cytokine production involved in immune response	5/74	65/18723	5.77439e-06	0.000117446	7.6058e-05	XCL1/IL4/NR4A3/DDX21/SLC7A5	5
GO:0071677	GO:0071677	positive regulation of mononuclear cell migration	5/74	65/18723	5.77439e-06	0.000117446	7.6058e-05	XCL1/IL4/TNF/CCL1/CCL4	5
GO:0072577	GO:0072577	endothelial cell apoptotic process	5/74	65/18723	5.77439e-06	0.000117446	7.6058e-05	IL13/IL4/TNF/CD40LG/RGCC	5
GO:0031098	GO:0031098	stress-activated protein kinase signaling cascade	8/74	247/18723	5.82768e-06	0.000117508	7.60982e-05	PRDX1/TNF/MYC/TRAF1/ZFP36L1/MAP2K3/TRAF4/GADD45B	8
GO:0071453	GO:0071453	cellular response to oxygen levels	7/74	177/18723	6.32611e-06	0.000126468	8.19008e-05	PLK3/LMNA/CFLAR/NAMPT/MYC/RGCC/ZFP36L1	7
GO:0032103	GO:0032103	positive regulation of response to external stimulus	10/74	427/18723	6.68989e-06	0.000131893	8.54138e-05	XCL1/IL2/IL4/LTA/TNF/NINJ1/NFKBIA/CCL1/IFNG/CCL4	10
GO:0042130	GO:0042130	negative regulation of T cell proliferation	5/74	67/18723	6.71024e-06	0.000131893	8.54138e-05	XCL1/IL2RA/VSIR/PRNP/SDC4	5
GO:0097278	GO:0097278	complement-dependent cytotoxicity	3/74	10/18723	6.97197e-06	0.000135895	8.80058e-05	IL13/IL4/HSP90AB1	3
GO:0002294	GO:0002294	CD4-positive, alpha-beta T cell differentiation involved in immune response	5/74	68/18723	7.22061e-06	0.000138434	8.96502e-05	IL2/IL4/IRF4/NFKBID/IFNG	5
GO:0046637	GO:0046637	regulation of alpha-beta T cell differentiation	5/74	68/18723	7.22061e-06	0.000138434	8.96502e-05	IL2/IL4/IRF4/NFKBID/IFNG	5
GO:2000515	GO:2000515	negative regulation of CD4-positive, alpha-beta T cell activation	4/74	32/18723	7.43377e-06	0.000141363	9.15464e-05	XCL1/IL2/IL4/VSIR	4
GO:0002287	GO:0002287	alpha-beta T cell activation involved in immune response	5/74	69/18723	7.76087e-06	0.000145221	9.40454e-05	IL2/IL4/IRF4/NFKBID/IFNG	5
GO:0002293	GO:0002293	alpha-beta T cell differentiation involved in immune response	5/74	69/18723	7.76087e-06	0.000145221	9.40454e-05	IL2/IL4/IRF4/NFKBID/IFNG	5
GO:0002761	GO:0002761	regulation of myeloid leukocyte differentiation	6/74	120/18723	7.93539e-06	0.000147309	9.5397e-05	ID2/IL4/TNF/MYC/ZFP36L1/IFNG	6
GO:0051090	GO:0051090	regulation of DNA-binding transcription factor activity	10/74	440/18723	8.69583e-06	0.000160154	0.000103716	TNFRSF4/XCL1/ID2/CFLAR/TNF/CD40LG/TRAF1/RGCC/NFKBIA/PRNP	10
GO:0002449	GO:0002449	lymphocyte mediated immunity	9/74	350/18723	9.54257e-06	0.000174376	0.000112926	PRDX1/XCL1/IL2/IL4/SERPINB9/LTA/TNF/CD40LG/GZMB	9
GO:0002460	GO:0002460	adaptive immune response based on somatic recombination of immune receptors built from immunoglobulin superfamily domains	9/74	356/18723	1.09313e-05	0.000198204	0.000128357	XCL1/IL2/IL4/IRF4/LTA/TNF/BACH2/CD40LG/NFKBID	9
GO:0002292	GO:0002292	T cell differentiation involved in immune response	5/74	75/18723	1.17013e-05	0.000210533	0.000136341	IL2/IL4/IRF4/NFKBID/IFNG	5
GO:0002366	GO:0002366	leukocyte activation involved in immune response	8/74	275/18723	1.27486e-05	0.000227625	0.00014741	IL2/IL13/IL4/IRF4/CD40LG/NR4A3/NFKBID/IFNG	8
GO:0043029	GO:0043029	T cell homeostasis	4/74	37/18723	1.34505e-05	0.00023834	0.000154349	BCL2L11/IL2/IL2RA/TNFSF14	4
GO:0009615	GO:0009615	response to virus	9/74	367/18723	1.39292e-05	0.000244966	0.00015864	XCL1/ODC1/IL4/TNF/BIRC3/DDX21/BCL2L1/IFNG/CCL4	9
GO:0002263	GO:0002263	cell activation involved in immune response	8/74	279/18723	1.4152e-05	0.000247026	0.000159974	IL2/IL13/IL4/IRF4/CD40LG/NR4A3/NFKBID/IFNG	8
GO:0033674	GO:0033674	positive regulation of kinase activity	10/74	467/18723	1.45789e-05	0.000252594	0.00016358	IL2/IL4/TNF/HSP90AB1/RGCC/MAP2K3/TRAF4/PRNP/SDC4/IFNG	10
GO:0007249	GO:0007249	I-kappaB kinase/NF-kappaB signaling	8/74	281/18723	1.49012e-05	0.000254038	0.000164515	REL/CFLAR/TNF/TRAF1/BIRC3/DDX21/NFKBIA/TRAF4	8
GO:0002705	GO:0002705	positive regulation of leukocyte mediated immunity	6/74	134/18723	1.49292e-05	0.000254038	0.000164515	XCL1/IL2/IL4/LTA/TNF/DDX21	6
GO:0072538	GO:0072538	T-helper 17 type immune response	4/74	38/18723	1.49881e-05	0.000254038	0.000164515	IL2/IL4/IRF4/NFKBID	4
GO:0002687	GO:0002687	positive regulation of leukocyte migration	6/74	135/18723	1.55751e-05	0.000262087	0.000169728	TNFRSF18/XCL1/IL4/TNF/CCL1/CCL4	6
GO:0051709	GO:0051709	regulation of killing of cells of other organism	3/74	13/18723	1.64753e-05	0.000275255	0.000178255	SERPINB9/BCL2L1/IFNG	3
GO:0045622	GO:0045622	regulation of T-helper cell differentiation	4/74	39/18723	1.66512e-05	0.000276221	0.000178881	IL2/IL4/IRF4/NFKBID	4
GO:0043281	GO:0043281	regulation of cysteine-type endopeptidase activity involved in apoptotic process	7/74	209/18723	1.86581e-05	0.000306488	0.000198482	BCL2L11/CFLAR/SERPINB9/TNF/MYC/BIRC3/TNFSF14	7
GO:0030099	GO:0030099	myeloid cell differentiation	9/74	381/18723	1.87378e-05	0.000306488	0.000198482	ID2/CSF2/IL4/IRF4/TNF/MYC/NFKBIA/ZFP36L1/IFNG	9
GO:0043367	GO:0043367	CD4-positive, alpha-beta T cell differentiation	5/74	83/18723	1.92073e-05	0.000310379	0.000201001	IL2/IL4/IRF4/NFKBID/IFNG	5
GO:0045637	GO:0045637	regulation of myeloid cell differentiation	7/74	210/18723	1.92411e-05	0.000310379	0.000201001	ID2/IL4/TNF/MYC/NFKBIA/ZFP36L1/IFNG	7
GO:0006970	GO:0006970	response to osmotic stress	5/74	84/18723	2.03605e-05	0.000326186	0.000211238	PLK3/TNF/HSP90AB1/NOLC1/ZFP36L1	5
GO:0045860	GO:0045860	positive regulation of protein kinase activity	9/74	386/18723	2.07677e-05	0.000330446	0.000213997	IL4/TNF/HSP90AB1/RGCC/MAP2K3/TRAF4/PRNP/SDC4/IFNG	9
GO:0030890	GO:0030890	positive regulation of B cell proliferation	4/74	42/18723	2.24574e-05	0.000354918	0.000229845	TNFRSF4/IL2/IL13/IL4	4
GO:0002377	GO:0002377	immunoglobulin production	7/74	216/18723	2.30642e-05	0.000362061	0.000234471	TNFRSF4/XCL1/IL2/IL13/IL4/TNF/CD40LG	7
GO:0046636	GO:0046636	negative regulation of alpha-beta T cell activation	4/74	43/18723	2.46869e-05	0.00038495	0.000249294	XCL1/IL2/IL4/VSIR	4
GO:0007162	GO:0007162	negative regulation of cell adhesion	8/74	303/18723	2.56017e-05	0.000396571	0.00025682	XCL1/IL2/IL4/IL2RA/VSIR/RGCC/PRNP/SDC4	8
GO:0071456	GO:0071456	cellular response to hypoxia	6/74	151/18723	2.93718e-05	0.000451977	0.0002927	PLK3/LMNA/CFLAR/MYC/RGCC/ZFP36L1	6
GO:0033157	GO:0033157	regulation of intracellular protein transport	7/74	229/18723	3.35248e-05	0.000512514	0.000331904	PLK3/HSP90AB1/INSIG1/NOLC1/GZMB/PRNP/IFNG	7
GO:0045591	GO:0045591	positive regulation of regulatory T cell differentiation	3/74	17/18723	3.8729e-05	0.000588228	0.000380936	IL2/VSIR/IFNG	3
GO:0051170	GO:0051170	import into nucleus	6/74	159/18723	3.92531e-05	0.00058884	0.000381333	LMNA/HSP90AB1/BACH2/NOLC1/NFKBIA/IFNG	6
GO:0036293	GO:0036293	response to decreased oxygen levels	8/74	322/18723	3.94491e-05	0.00058884	0.000381333	PLK3/LMNA/CFLAR/LTA/NAMPT/MYC/RGCC/ZFP36L1	8
GO:2000116	GO:2000116	regulation of cysteine-type endopeptidase activity	7/74	235/18723	3.95245e-05	0.00058884	0.000381333	BCL2L11/CFLAR/SERPINB9/TNF/MYC/BIRC3/TNFSF14	7
GO:0120162	GO:0120162	positive regulation of cold-induced thermogenesis	5/74	97/18723	4.08428e-05	0.000604629	0.000391558	IL13/IL4/IRF4/FABP5/KDM6B	5
GO:0002444	GO:0002444	myeloid leukocyte mediated immunity	5/74	99/18723	4.50511e-05	0.000655446	0.000424467	IL13/IL4/SERPINB9/NR4A3/DDX21	5
GO:0042100	GO:0042100	B cell proliferation	5/74	99/18723	4.50511e-05	0.000655446	0.000424467	TNFRSF4/IL2/IL13/IL4/CD40LG	5
GO:0002448	GO:0002448	mast cell mediated immunity	4/74	50/18723	4.51162e-05	0.000655446	0.000424467	IL13/IL4/SERPINB9/NR4A3	4
GO:0002544	GO:0002544	chronic inflammatory response	3/74	18/18723	4.63429e-05	0.000669111	0.000433316	IL4/LTA/TNF	3
GO:0070371	GO:0070371	ERK1 and ERK2 cascade	8/74	330/18723	4.69146e-05	0.000673211	0.000435971	XCL1/CFLAR/TNF/DUSP4/MYC/ZFP36L1/CCL1/CCL4	8
GO:0042102	GO:0042102	positive regulation of T cell proliferation	5/74	101/18723	4.95874e-05	0.000707225	0.000457999	XCL1/IL2/IL4/CD40LG/IL2RA	5
GO:0052548	GO:0052548	regulation of endopeptidase activity	9/74	432/18723	4.99992e-05	0.000708777	0.000459004	BCL2L11/CFLAR/SERPINB9/TNF/MYC/BIRC3/VSIR/PRNP/TNFSF14	9
GO:0002706	GO:0002706	regulation of lymphocyte mediated immunity	6/74	168/18723	5.33881e-05	0.000747753	0.000484245	XCL1/IL2/IL4/SERPINB9/LTA/TNF	6
GO:0002822	GO:0002822	regulation of adaptive immune response based on somatic recombination of immune receptors built from immunoglobulin superfamily domains	6/74	168/18723	5.33881e-05	0.000747753	0.000484245	XCL1/IL2/IL4/LTA/TNF/NFKBID	6
GO:0048245	GO:0048245	eosinophil chemotaxis	3/74	19/18723	5.48759e-05	0.000755028	0.000488957	IL4/CCL1/CCL4	3
GO:1900221	GO:1900221	regulation of amyloid-beta clearance	3/74	19/18723	5.48759e-05	0.000755028	0.000488957	IL4/TNF/IFNG	3
GO:2000319	GO:2000319	regulation of T-helper 17 cell differentiation	3/74	19/18723	5.48759e-05	0.000755028	0.000488957	IL2/IL4/NFKBID	3
GO:0033002	GO:0033002	muscle cell proliferation	7/74	248/18723	5.55829e-05	0.000760282	0.000492359	ID2/CFLAR/IL13/TNF/NAMPT/NR4A3/IFNG	7
GO:0043122	GO:0043122	regulation of I-kappaB kinase/NF-kappaB signaling	7/74	249/18723	5.70118e-05	0.000771263	0.00049947	REL/CFLAR/TNF/TRAF1/BIRC3/DDX21/TRAF4	7
GO:0048661	GO:0048661	positive regulation of smooth muscle cell proliferation	5/74	104/18723	5.70451e-05	0.000771263	0.00049947	ID2/IL13/TNF/NAMPT/NR4A3	5
GO:0033005	GO:0033005	positive regulation of mast cell activation	3/74	20/18723	6.43767e-05	0.000860441	0.000557222	IL13/IL4/NR4A3	3
GO:0043011	GO:0043011	myeloid dendritic cell differentiation	3/74	20/18723	6.43767e-05	0.000860441	0.000557222	CSF2/IL4/IRF4	3
GO:0001659	GO:0001659	temperature homeostasis	6/74	174/18723	6.48864e-05	0.000862326	0.000558442	IL13/IL4/IRF4/TNF/FABP5/KDM6B	6
GO:0070482	GO:0070482	response to oxygen levels	8/74	347/18723	6.67503e-05	0.000882084	0.000571238	PLK3/LMNA/CFLAR/LTA/NAMPT/MYC/RGCC/ZFP36L1	8
GO:0002698	GO:0002698	negative regulation of immune effector process	5/74	110/18723	7.45382e-05	0.000979466	0.000634302	XCL1/IL2/IL4/SERPINB9/TNF	5
GO:0048660	GO:0048660	regulation of smooth muscle cell proliferation	6/74	180/18723	7.82838e-05	0.00102294	0.000662455	ID2/IL13/TNF/NAMPT/NR4A3/IFNG	6
GO:2001233	GO:2001233	regulation of apoptotic signaling pathway	8/74	356/18723	7.98045e-05	0.00103701	0.000671571	LMNA/BCL2L11/CFLAR/CSF2/IL4/TNF/TRAF1/BCL2L1	8
GO:0002763	GO:0002763	positive regulation of myeloid leukocyte differentiation	4/74	58/18723	8.11549e-05	0.00104874	0.000679162	ID2/TNF/ZFP36L1/IFNG	4
GO:0052547	GO:0052547	regulation of peptidase activity	9/74	461/18723	8.23341e-05	0.00105813	0.000685244	BCL2L11/CFLAR/SERPINB9/TNF/MYC/BIRC3/VSIR/PRNP/TNFSF14	9
GO:0002708	GO:0002708	positive regulation of lymphocyte mediated immunity	5/74	113/18723	8.47025e-05	0.00108262	0.000701104	XCL1/IL2/IL4/LTA/TNF	5
GO:0002819	GO:0002819	regulation of adaptive immune response	6/74	183/18723	8.57634e-05	0.00109022	0.000706027	XCL1/IL2/IL4/LTA/TNF/NFKBID	6
GO:0032700	GO:0032700	negative regulation of interleukin-17 production	3/74	22/18723	8.64723e-05	0.00109329	0.000708015	VSIR/PRNP/IFNG	3
GO:0002286	GO:0002286	T cell activation involved in immune response	5/74	114/18723	8.83172e-05	0.00110545	0.00071589	IL2/IL4/IRF4/NFKBID/IFNG	5
GO:0048659	GO:0048659	smooth muscle cell proliferation	6/74	184/18723	8.83793e-05	0.00110545	0.00071589	ID2/IL13/TNF/NAMPT/NR4A3/IFNG	6
GO:0071675	GO:0071675	regulation of mononuclear cell migration	5/74	115/18723	9.20494e-05	0.00114523	0.000741652	XCL1/IL4/TNF/CCL1/CCL4	5
GO:0032740	GO:0032740	positive regulation of interleukin-17 production	3/74	23/18723	9.91611e-05	0.00121456	0.000786547	IL2/SLC7A5/CCL1	3
GO:0072677	GO:0072677	eosinophil migration	3/74	23/18723	9.91611e-05	0.00121456	0.000786547	IL4/CCL1/CCL4	3
GO:0048872	GO:0048872	homeostasis of number of cells	7/74	272/18723	9.91792e-05	0.00121456	0.000786547	PRDX1/ID2/BCL2L11/IL2/IL2RA/ZFP36L1/TNFSF14	7
GO:0071346	GO:0071346	cellular response to interferon-gamma	5/74	118/18723	0.000103978	0.00126668	0.000820305	XCL1/HSP90AB1/CCL1/IFNG/CCL4	5
GO:0002260	GO:0002260	lymphocyte homeostasis	4/74	62/18723	0.00010544	0.00127126	0.000823267	BCL2L11/IL2/IL2RA/TNFSF14	4
GO:0070265	GO:0070265	necrotic cell death	4/74	62/18723	0.00010544	0.00127126	0.000823267	CFLAR/TNF/NINJ1/BIRC3	4
GO:0045862	GO:0045862	positive regulation of proteolysis	8/74	372/18723	0.000108247	0.0012984	0.000840847	PLK3/BCL2L11/CFLAR/TNF/RNF19A/MYC/VSIR/IFNG	8
GO:0032872	GO:0032872	regulation of stress-activated MAPK cascade	6/74	192/18723	0.000111677	0.00132858	0.000860388	PRDX1/TNF/MYC/TRAF1/TRAF4/GADD45B	6
GO:0043410	GO:0043410	positive regulation of MAPK cascade	9/74	480/18723	0.000111898	0.00132858	0.000860388	XCL1/CFLAR/TNF/TRAF1/MAP2K3/TRAF4/CCL1/GADD45B/CCL4	9
GO:0031349	GO:0031349	positive regulation of defense response	7/74	278/18723	0.000113587	0.00134182	0.000868962	IL2/LTA/TNF/NINJ1/NFKBIA/CCL1/IFNG	7
GO:0002285	GO:0002285	lymphocyte activation involved in immune response	6/74	194/18723	0.000118203	0.00138933	0.000899728	IL2/IL4/IRF4/CD40LG/NFKBID/IFNG	6
GO:0030888	GO:0030888	regulation of B cell proliferation	4/74	64/18723	0.00011938	0.00139615	0.000904149	TNFRSF4/IL2/IL13/IL4	4
GO:0070302	GO:0070302	regulation of stress-activated protein kinase signaling cascade	6/74	195/18723	0.000121577	0.00141477	0.000916205	PRDX1/TNF/MYC/TRAF1/TRAF4/GADD45B	6
GO:0032753	GO:0032753	positive regulation of interleukin-4 production	3/74	25/18723	0.000128051	0.00147543	0.000955487	IRF4/CD40LG/SLC7A5	3
GO:2000316	GO:2000316	regulation of T-helper 17 type immune response	3/74	25/18723	0.000128051	0.00147543	0.000955487	IL2/IL4/NFKBID	3
GO:0050864	GO:0050864	regulation of B cell activation	6/74	198/18723	0.000132162	0.00151532	0.000981323	TNFRSF4/ID2/IL2/IL13/IL4/ZFP36L1	6
GO:0042093	GO:0042093	T-helper cell differentiation	4/74	66/18723	0.000134611	0.00153587	0.000994633	IL2/IL4/IRF4/NFKBID	4
GO:0046635	GO:0046635	positive regulation of alpha-beta T cell activation	4/74	67/18723	0.000142731	0.00162062	0.00104952	XCL1/HSPH1/NFKBID/IFNG	4
GO:0009651	GO:0009651	response to salt stress	3/74	27/18723	0.000161926	0.00182089	0.00117921	TNF/HSP90AB1/ZFP36L1	3
GO:0036037	GO:0036037	CD8-positive, alpha-beta T cell activation	3/74	27/18723	0.000161926	0.00182089	0.00117921	XCL1/TNFSF8/VSIR	3
GO:0017038	GO:0017038	protein import	6/74	206/18723	0.000163996	0.00183534	0.00118857	LMNA/HSP90AB1/NOLC1/NFKBIA/TOMM40/IFNG	6
GO:0016064	GO:0016064	immunoglobulin mediated immune response	6/74	207/18723	0.000168368	0.00187529	0.00121444	XCL1/IL2/IL4/LTA/TNF/CD40LG	6
GO:0002381	GO:0002381	immunoglobulin production involved in immunoglobulin-mediated immune response	4/74	70/18723	0.000169221	0.00187587	0.00121482	XCL1/IL2/IL4/CD40LG	4
GO:0045589	GO:0045589	regulation of regulatory T cell differentiation	3/74	28/18723	0.000180843	0.00198967	0.00128851	IL2/VSIR/IFNG	3
GO:0002685	GO:0002685	regulation of leukocyte migration	6/74	210/18723	0.000182039	0.00198967	0.00128851	TNFRSF18/XCL1/IL4/TNF/CCL1/CCL4	6
GO:0019724	GO:0019724	B cell mediated immunity	6/74	210/18723	0.000182039	0.00198967	0.00128851	XCL1/IL2/IL4/LTA/TNF/CD40LG	6
GO:0032729	GO:0032729	positive regulation of interferon-gamma production	4/74	72/18723	0.000188745	0.00205337	0.00132976	IL2/LTA/TNF/SLC7A5	4
GO:0051222	GO:0051222	positive regulation of protein transport	7/74	303/18723	0.000193141	0.00209146	0.00135443	PLK3/IL13/TNF/HSP90AB1/GZMB/PRNP/IFNG	7
GO:0001773	GO:0001773	myeloid dendritic cell activation	3/74	29/18723	0.000201138	0.00216802	0.00140401	CSF2/IL4/IRF4	3
GO:0001666	GO:0001666	response to hypoxia	7/74	307/18723	0.000209269	0.0022412	0.0014514	PLK3/LMNA/CFLAR/LTA/MYC/RGCC/ZFP36L1	7
GO:0002437	GO:0002437	inflammatory response to antigenic stimulus	4/74	74/18723	0.000209843	0.0022412	0.0014514	LTA/TNF/IL2RA/KDM6B	4
GO:0045577	GO:0045577	regulation of B cell differentiation	3/74	30/18723	0.000222853	0.00236933	0.00153438	ID2/IL2/ZFP36L1	3
GO:0030183	GO:0030183	B cell differentiation	5/74	141/18723	0.000239452	0.00252288	0.00163382	ID2/IL2/IL4/CD40LG/ZFP36L1	5
GO:0034341	GO:0034341	response to interferon-gamma	5/74	141/18723	0.000239452	0.00252288	0.00163382	XCL1/HSP90AB1/CCL1/IFNG/CCL4	5
GO:0045066	GO:0045066	regulatory T cell differentiation	3/74	31/18723	0.000246031	0.00258057	0.00167118	IL2/VSIR/IFNG	3
GO:0043154	GO:0043154	negative regulation of cysteine-type endopeptidase activity involved in apoptotic process	4/74	78/18723	0.000257061	0.00268096	0.00173619	SERPINB9/TNF/BIRC3/TNFSF14	4
GO:2001234	GO:2001234	negative regulation of apoptotic signaling pathway	6/74	224/18723	0.000257894	0.00268096	0.00173619	LMNA/CFLAR/CSF2/IL4/TNF/BCL2L1	6
GO:0106106	GO:0106106	cold-induced thermogenesis	5/74	144/18723	0.000264003	0.00271139	0.00175589	IL13/IL4/IRF4/FABP5/KDM6B	5
GO:0120161	GO:0120161	regulation of cold-induced thermogenesis	5/74	144/18723	0.000264003	0.00271139	0.00175589	IL13/IL4/IRF4/FABP5/KDM6B	5
GO:1904951	GO:1904951	positive regulation of establishment of protein localization	7/74	319/18723	0.000264299	0.00271139	0.00175589	PLK3/IL13/TNF/HSP90AB1/GZMB/PRNP/IFNG	7
GO:0032633	GO:0032633	interleukin-4 production	3/74	33/18723	0.000296942	0.00299373	0.00193874	IRF4/CD40LG/SLC7A5	3
GO:0032673	GO:0032673	regulation of interleukin-4 production	3/74	33/18723	0.000296942	0.00299373	0.00193874	IRF4/CD40LG/SLC7A5	3
GO:1901099	GO:1901099	negative regulation of signal transduction in absence of ligand	3/74	33/18723	0.000296942	0.00299373	0.00193874	CSF2/TNF/BCL2L1	3
GO:2001240	GO:2001240	negative regulation of extrinsic apoptotic signaling pathway in absence of ligand	3/74	33/18723	0.000296942	0.00299373	0.00193874	CSF2/TNF/BCL2L1	3
GO:0042113	GO:0042113	B cell activation	7/74	334/18723	0.000348904	0.00350252	0.00226823	TNFRSF4/ID2/IL2/IL13/IL4/CD40LG/ZFP36L1	7
GO:0030856	GO:0030856	regulation of epithelial cell differentiation	5/74	154/18723	0.000359856	0.00359702	0.00232943	ZBED2/IL13/TNF/ZFP36L1/IFNG	5
GO:0032386	GO:0032386	regulation of intracellular transport	7/74	337/18723	0.00036818	0.00366457	0.00237317	PLK3/HSP90AB1/INSIG1/NOLC1/GZMB/PRNP/IFNG	7
GO:0006606	GO:0006606	protein import into nucleus	5/74	155/18723	0.000370717	0.00367251	0.00237832	LMNA/HSP90AB1/NOLC1/NFKBIA/IFNG	5
GO:0045921	GO:0045921	positive regulation of exocytosis	4/74	86/18723	0.000373689	0.00367251	0.00237832	IL13/IL4/SDC4/IFNG	4
GO:2000117	GO:2000117	negative regulation of cysteine-type endopeptidase activity	4/74	86/18723	0.000373689	0.00367251	0.00237832	SERPINB9/TNF/BIRC3/TNFSF14	4
GO:0030224	GO:0030224	monocyte differentiation	3/74	36/18723	0.000385302	0.0037708	0.00244197	CSF2/MYC/ZFP36L1	3
GO:0001776	GO:0001776	leukocyte homeostasis	4/74	87/18723	0.000390534	0.00380608	0.00246482	BCL2L11/IL2/IL2RA/TNFSF14	4
GO:1990845	GO:1990845	adaptive thermogenesis	5/74	157/18723	0.000393182	0.00381598	0.00247123	IL13/IL4/IRF4/FABP5/KDM6B	5
GO:0046330	GO:0046330	positive regulation of JNK cascade	4/74	89/18723	0.000425843	0.00411589	0.00266545	TNF/TRAF1/TRAF4/GADD45B	4
GO:0090316	GO:0090316	positive regulation of intracellular protein transport	5/74	160/18723	0.00042879	0.00412732	0.00267285	PLK3/HSP90AB1/GZMB/PRNP/IFNG	5
GO:0045638	GO:0045638	negative regulation of myeloid cell differentiation	4/74	90/18723	0.000444326	0.00425934	0.00275835	IL4/MYC/NFKBIA/ZFP36L1	4
GO:0097242	GO:0097242	amyloid-beta clearance	3/74	38/18723	0.000452665	0.00432157	0.00279865	IL4/TNF/IFNG	3
GO:0002275	GO:0002275	myeloid cell activation involved in immune response	4/74	91/18723	0.000463375	0.00440583	0.00285321	IL13/IL4/NR4A3/IFNG	4
GO:2000516	GO:2000516	positive regulation of CD4-positive, alpha-beta T cell activation	3/74	39/18723	0.000489	0.00463065	0.00299881	XCL1/NFKBID/IFNG	3
GO:0002690	GO:0002690	positive regulation of leukocyte chemotaxis	4/74	94/18723	0.000524012	0.00493204	0.00319399	XCL1/IL4/CCL1/CCL4	4
GO:0045429	GO:0045429	positive regulation of nitric oxide biosynthetic process	3/74	40/18723	0.000527153	0.00493204	0.00319399	TNF/HSP90AB1/IFNG	3
GO:0070266	GO:0070266	necroptotic process	3/74	40/18723	0.000527153	0.00493204	0.00319399	CFLAR/TNF/BIRC3	3
GO:1901653	GO:1901653	cellular response to peptide	7/74	359/18723	0.000537166	0.0050057	0.00324169	BCL2L11/CFLAR/NAMPT/INSIG1/NR4A3/ZFP36L1/PRNP	7
GO:0071634	GO:0071634	regulation of transforming growth factor beta production	3/74	41/18723	0.000567161	0.00524344	0.00339565	XCL1/IL13/HSP90AB1	3
GO:1904407	GO:1904407	positive regulation of nitric oxide metabolic process	3/74	41/18723	0.000567161	0.00524344	0.00339565	TNF/HSP90AB1/IFNG	3
GO:1901216	GO:1901216	positive regulation of neuron death	4/74	97/18723	0.000590096	0.00543399	0.00351905	BCL2L11/TNF/PRNP/IFNG	4
GO:0032689	GO:0032689	negative regulation of interferon-gamma production	3/74	42/18723	0.000609062	0.00556482	0.00360378	XCL1/VSIR/PRNP	3
GO:0033003	GO:0033003	regulation of mast cell activation	3/74	42/18723	0.000609062	0.00556482	0.00360378	IL13/IL4/NR4A3	3
GO:0050900	GO:0050900	leukocyte migration	7/74	369/18723	0.000632047	0.00575236	0.00372523	TNFRSF18/XCL1/IL4/TNF/NINJ1/CCL1/CCL4	7
GO:0008630	GO:0008630	intrinsic apoptotic signaling pathway in response to DNA damage	4/74	99/18723	0.00063731	0.00577778	0.00374169	BCL2L11/TNF/BCL2A1/BCL2L1	4
GO:1905475	GO:1905475	regulation of protein localization to membrane	5/74	175/18723	0.000644642	0.00582169	0.00377013	TNF/GZMB/PRNP/BCL2L1/IFNG	5
GO:0071604	GO:0071604	transforming growth factor beta production	3/74	43/18723	0.00065289	0.00585099	0.0037891	XCL1/IL13/HSP90AB1	3
GO:2001239	GO:2001239	regulation of extrinsic apoptotic signaling pathway in absence of ligand	3/74	43/18723	0.00065289	0.00585099	0.0037891	CSF2/TNF/BCL2L1	3
GO:0035747	GO:0035747	natural killer cell chemotaxis	2/74	10/18723	0.000679405	0.00599671	0.00388347	XCL1/CCL4	2
GO:0042368	GO:0042368	vitamin D biosynthetic process	2/74	10/18723	0.000679405	0.00599671	0.00388347	TNF/IFNG	2
GO:0045348	GO:0045348	positive regulation of MHC class II biosynthetic process	2/74	10/18723	0.000679405	0.00599671	0.00388347	IL4/IFNG	2
GO:0071803	GO:0071803	positive regulation of podosome assembly	2/74	10/18723	0.000679405	0.00599671	0.00388347	CSF2/TNF	2
GO:0046006	GO:0046006	regulation of activated T cell proliferation	3/74	44/18723	0.000698681	0.00612066	0.00396374	IL2/IL2RA/PRNP	3
GO:0150076	GO:0150076	neuroinflammatory response	3/74	44/18723	0.000698681	0.00612066	0.00396374	IL4/TNF/IFNG	3
GO:0009896	GO:0009896	positive regulation of catabolic process	8/74	492/18723	0.00070803	0.00617941	0.00400179	PLK3/BCL2L11/IL4/TNF/RNF19A/VSIR/ZFP36L1/IFNG	8
GO:1902106	GO:1902106	negative regulation of leukocyte differentiation	4/74	102/18723	0.000713069	0.00618477	0.00400526	ID2/IL2/IL4/MYC	4
GO:0010950	GO:0010950	positive regulation of endopeptidase activity	5/74	179/18723	0.000713933	0.00618477	0.00400526	BCL2L11/CFLAR/TNF/MYC/VSIR	5
GO:0045639	GO:0045639	positive regulation of myeloid cell differentiation	4/74	103/18723	0.00073968	0.00638417	0.00413439	ID2/TNF/ZFP36L1/IFNG	4
GO:0071364	GO:0071364	cellular response to epidermal growth factor stimulus	3/74	45/18723	0.000746471	0.00639559	0.00414178	CFLAR/NCL/ZFP36L1	3
GO:1904646	GO:1904646	cellular response to amyloid-beta	3/74	45/18723	0.000746471	0.00639559	0.00414178	BCL2L11/NAMPT/PRNP	3
GO:1903076	GO:1903076	regulation of protein localization to plasma membrane	4/74	104/18723	0.000766985	0.00654736	0.00424007	TNF/PRNP/BCL2L1/IFNG	4
GO:0031294	GO:0031294	lymphocyte costimulation	3/74	46/18723	0.000796293	0.00677283	0.00438609	IL4/CD40LG/TNFSF14	3
GO:0035821	GO:0035821	modulation of process of other organism	4/74	106/18723	0.000823722	0.00684558	0.0044332	SERPINB9/BCL2L1/IFNG/CCL4	4
GO:1903707	GO:1903707	negative regulation of hemopoiesis	4/74	106/18723	0.000823722	0.00684558	0.0044332	ID2/IL2/IL4/MYC	4
GO:1905477	GO:1905477	positive regulation of protein localization to membrane	4/74	106/18723	0.000823722	0.00684558	0.0044332	TNF/GZMB/PRNP/IFNG	4
GO:0043433	GO:0043433	negative regulation of DNA-binding transcription factor activity	5/74	185/18723	0.000828139	0.00684558	0.0044332	TNFRSF4/XCL1/ID2/NFKBIA/PRNP	5
GO:0030656	GO:0030656	regulation of vitamin metabolic process	2/74	11/18723	0.000828259	0.00684558	0.0044332	TNF/IFNG	2
GO:0044068	GO:0044068	modulation by symbiont of host cellular process	2/74	11/18723	0.000828259	0.00684558	0.0044332	SERPINB9/BCL2L1	2
GO:1900222	GO:1900222	negative regulation of amyloid-beta clearance	2/74	11/18723	0.000828259	0.00684558	0.0044332	TNF/IFNG	2
GO:2000320	GO:2000320	negative regulation of T-helper 17 cell differentiation	2/74	11/18723	0.000828259	0.00684558	0.0044332	IL2/IL4	2
GO:0050798	GO:0050798	activated T cell proliferation	3/74	47/18723	0.000848182	0.00691451	0.00447784	IL2/IL2RA/PRNP	3
GO:0097028	GO:0097028	dendritic cell differentiation	3/74	47/18723	0.000848182	0.00691451	0.00447784	CSF2/IL4/IRF4	3
GO:0097300	GO:0097300	programmed necrotic cell death	3/74	47/18723	0.000848182	0.00691451	0.00447784	CFLAR/TNF/BIRC3	3
GO:0043123	GO:0043123	positive regulation of I-kappaB kinase/NF-kappaB signaling	5/74	186/18723	0.000848424	0.00691451	0.00447784	REL/CFLAR/TNF/BIRC3/DDX21	5
GO:0008637	GO:0008637	apoptotic mitochondrial changes	4/74	107/18723	0.000853174	0.00692907	0.00448727	LMNA/BCL2L11/GZMB/BCL2L1	4
GO:0043303	GO:0043303	mast cell degranulation	3/74	48/18723	0.000902171	0.00725147	0.00469605	IL13/IL4/NR4A3	3
GO:0090199	GO:0090199	regulation of release of cytochrome c from mitochondria	3/74	48/18723	0.000902171	0.00725147	0.00469605	LMNA/BCL2L11/BCL2L1	3
GO:1902003	GO:1902003	regulation of amyloid-beta formation	3/74	48/18723	0.000902171	0.00725147	0.00469605	TNF/PRNP/IFNG	3
GO:0002204	GO:0002204	somatic recombination of immunoglobulin genes involved in immune response	3/74	49/18723	0.000958293	0.00754696	0.00488741	IL2/IL4/CD40LG	3
GO:0002208	GO:0002208	somatic diversification of immunoglobulins involved in immune response	3/74	49/18723	0.000958293	0.00754696	0.00488741	IL2/IL4/CD40LG	3
GO:0002279	GO:0002279	mast cell activation involved in immune response	3/74	49/18723	0.000958293	0.00754696	0.00488741	IL13/IL4/NR4A3	3
GO:0030225	GO:0030225	macrophage differentiation	3/74	49/18723	0.000958293	0.00754696	0.00488741	ID2/CSF2/IFNG	3
GO:0045190	GO:0045190	isotype switching	3/74	49/18723	0.000958293	0.00754696	0.00488741	IL2/IL4/CD40LG	3
GO:0070849	GO:0070849	response to epidermal growth factor	3/74	49/18723	0.000958293	0.00754696	0.00488741	CFLAR/NCL/ZFP36L1	3
GO:0002863	GO:0002863	positive regulation of inflammatory response to antigenic stimulus	2/74	12/18723	0.000991369	0.00765285	0.00495599	LTA/TNF	2
GO:0032736	GO:0032736	positive regulation of interleukin-13 production	2/74	12/18723	0.000991369	0.00765285	0.00495599	IL4/IRF4	2
GO:0035739	GO:0035739	CD4-positive, alpha-beta T cell proliferation	2/74	12/18723	0.000991369	0.00765285	0.00495599	XCL1/VSIR	2
GO:0071635	GO:0071635	negative regulation of transforming growth factor beta production	2/74	12/18723	0.000991369	0.00765285	0.00495599	IL13/HSP90AB1	2
GO:2000317	GO:2000317	negative regulation of T-helper 17 type immune response	2/74	12/18723	0.000991369	0.00765285	0.00495599	IL2/IL4	2
GO:2000561	GO:2000561	regulation of CD4-positive, alpha-beta T cell proliferation	2/74	12/18723	0.000991369	0.00765285	0.00495599	XCL1/VSIR	2
GO:1901222	GO:1901222	regulation of NIK/NF-kappaB signaling	4/74	112/18723	0.00101167	0.00778386	0.00504083	PRDX1/TNF/NFKBIA/TNFSF14	4
GO:1904036	GO:1904036	negative regulation of epithelial cell apoptotic process	3/74	50/18723	0.00101658	0.00779601	0.0050487	CFLAR/IL13/IL4	3
GO:0071674	GO:0071674	mononuclear cell migration	5/74	196/18723	0.00107226	0.00819612	0.00530781	XCL1/IL4/TNF/CCL1/CCL4	5
GO:0010952	GO:0010952	positive regulation of peptidase activity	5/74	197/18723	0.00109683	0.00835666	0.00541177	BCL2L11/CFLAR/TNF/MYC/VSIR	5
GO:0035745	GO:0035745	T-helper 2 cell cytokine production	2/74	13/18723	0.00116862	0.00870512	0.00563744	XCL1/IL4	2
GO:0042362	GO:0042362	fat-soluble vitamin biosynthetic process	2/74	13/18723	0.00116862	0.00870512	0.00563744	TNF/IFNG	2
GO:0046642	GO:0046642	negative regulation of alpha-beta T cell proliferation	2/74	13/18723	0.00116862	0.00870512	0.00563744	XCL1/VSIR	2
GO:0048302	GO:0048302	regulation of isotype switching to IgG isotypes	2/74	13/18723	0.00116862	0.00870512	0.00563744	IL2/IL4	2
GO:0071801	GO:0071801	regulation of podosome assembly	2/74	13/18723	0.00116862	0.00870512	0.00563744	CSF2/TNF	2
GO:1902947	GO:1902947	regulation of tau-protein kinase activity	2/74	13/18723	0.00116862	0.00870512	0.00563744	HSP90AB1/IFNG	2
GO:2000551	GO:2000551	regulation of T-helper 2 cell cytokine production	2/74	13/18723	0.00116862	0.00870512	0.00563744	XCL1/IL4	2
GO:0051054	GO:0051054	positive regulation of DNA metabolic process	5/74	201/18723	0.00119934	0.00890557	0.00576725	IL2/IL4/HSP90AB1/MYC/RGCC	5
GO:0006913	GO:0006913	nucleocytoplasmic transport	6/74	301/18723	0.00121696	0.00897938	0.00581505	LMNA/HSP90AB1/BACH2/NOLC1/NFKBIA/IFNG	6
GO:0051169	GO:0051169	nuclear transport	6/74	301/18723	0.00121696	0.00897938	0.00581505	LMNA/HSP90AB1/BACH2/NOLC1/NFKBIA/IFNG	6
GO:0032388	GO:0032388	positive regulation of intracellular transport	5/74	202/18723	0.00122604	0.00901794	0.00584002	PLK3/HSP90AB1/GZMB/PRNP/IFNG	5
GO:0002823	GO:0002823	negative regulation of adaptive immune response based on somatic recombination of immune receptors built from immunoglobulin superfamily domains	3/74	54/18723	0.00127202	0.00932685	0.00604007	XCL1/IL2/IL4	3
GO:0038066	GO:0038066	p38MAPK cascade	3/74	55/18723	0.00134161	0.00969764	0.00628019	ZFP36L1/MAP2K3/GADD45B	3
GO:0045620	GO:0045620	negative regulation of lymphocyte differentiation	3/74	55/18723	0.00134161	0.00969764	0.00628019	ID2/IL2/IL4	3
GO:1902991	GO:1902991	regulation of amyloid precursor protein catabolic process	3/74	55/18723	0.00134161	0.00969764	0.00628019	TNF/PRNP/IFNG	3
GO:0002224	GO:0002224	toll-like receptor signaling pathway	4/74	121/18723	0.00134734	0.00969764	0.00628019	IRF4/NINJ1/BIRC3/NFKBIA	4
GO:0033008	GO:0033008	positive regulation of mast cell activation involved in immune response	2/74	14/18723	0.00135991	0.00969764	0.00628019	IL13/IL4	2
GO:0043306	GO:0043306	positive regulation of mast cell degranulation	2/74	14/18723	0.00135991	0.00969764	0.00628019	IL13/IL4	2
GO:0048291	GO:0048291	isotype switching to IgG isotypes	2/74	14/18723	0.00135991	0.00969764	0.00628019	IL2/IL4	2
GO:1901722	GO:1901722	regulation of cell proliferation involved in kidney development	2/74	14/18723	0.00135991	0.00969764	0.00628019	CFLAR/MYC	2
GO:1901857	GO:1901857	positive regulation of cellular respiration	2/74	14/18723	0.00135991	0.00969764	0.00628019	IL4/IFNG	2
GO:0072594	GO:0072594	establishment of protein localization to organelle	7/74	422/18723	0.00138025	0.00981281	0.00635478	LMNA/HSP90AB1/NOLC1/GZMB/NFKBIA/TOMM40/IFNG	7
GO:0002688	GO:0002688	regulation of leukocyte chemotaxis	4/74	122/18723	0.00138889	0.00983209	0.00636726	XCL1/IL4/CCL1/CCL4	4
GO:0070372	GO:0070372	regulation of ERK1 and ERK2 cascade	6/74	309/18723	0.00139137	0.00983209	0.00636726	XCL1/CFLAR/TNF/DUSP4/CCL1/CCL4	6
GO:1901215	GO:1901215	negative regulation of neuron death	5/74	208/18723	0.00139558	0.00983214	0.0063673	REL/IL13/HSP90AB1/NR4A3/BCL2L1	5
GO:0002886	GO:0002886	regulation of myeloid leukocyte mediated immunity	3/74	56/18723	0.00141355	0.00986955	0.00639152	IL13/IL4/DDX21	3
GO:0071385	GO:0071385	cellular response to glucocorticoid stimulus	3/74	56/18723	0.00141355	0.00986955	0.00639152	BCL2L11/CFLAR/ZFP36L1	3
GO:1904645	GO:1904645	response to amyloid-beta	3/74	56/18723	0.00141355	0.00986955	0.00639152	BCL2L11/NAMPT/PRNP	3
GO:0001909	GO:0001909	leukocyte mediated cytotoxicity	4/74	124/18723	0.00147465	0.0102177	0.006617	PRDX1/XCL1/SERPINB9/GZMB	4
GO:0010508	GO:0010508	positive regulation of autophagy	4/74	124/18723	0.00147465	0.0102177	0.006617	PLK3/BCL2L11/IL4/IFNG	4
GO:0031331	GO:0031331	positive regulation of cellular catabolic process	7/74	427/18723	0.00147652	0.0102177	0.006617	PLK3/BCL2L11/IL4/TNF/RNF19A/ZFP36L1/IFNG	7
GO:0016447	GO:0016447	somatic recombination of immunoglobulin gene segments	3/74	57/18723	0.00148787	0.0102357	0.00662863	IL2/IL4/CD40LG	3
GO:0034205	GO:0034205	amyloid-beta formation	3/74	57/18723	0.00148787	0.0102357	0.00662863	TNF/PRNP/IFNG	3
GO:0043523	GO:0043523	regulation of neuron apoptotic process	5/74	212/18723	0.00151785	0.0103577	0.00670764	BCL2L11/TNF/HSP90AB1/PRNP/BCL2L1	5
GO:0071621	GO:0071621	granulocyte chemotaxis	4/74	125/18723	0.00151889	0.0103577	0.00670764	XCL1/IL4/CCL1/CCL4	4
GO:1904375	GO:1904375	regulation of protein localization to cell periphery	4/74	125/18723	0.00151889	0.0103577	0.00670764	TNF/PRNP/BCL2L1/IFNG	4
GO:0032874	GO:0032874	positive regulation of stress-activated MAPK cascade	4/74	126/18723	0.00156405	0.0105499	0.0068321	TNF/TRAF1/TRAF4/GADD45B	4
GO:0043525	GO:0043525	positive regulation of neuron apoptotic process	3/74	58/18723	0.0015646	0.0105499	0.0068321	BCL2L11/TNF/PRNP	3
GO:0045346	GO:0045346	regulation of MHC class II biosynthetic process	2/74	15/18723	0.00156512	0.0105499	0.0068321	IL4/IFNG	2
GO:1903543	GO:1903543	positive regulation of exosomal secretion	2/74	15/18723	0.00156512	0.0105499	0.0068321	SDC4/IFNG	2
GO:0001836	GO:0001836	release of cytochrome c from mitochondria	3/74	59/18723	0.00164377	0.0110166	0.00713433	LMNA/BCL2L11/BCL2L1	3
GO:0002820	GO:0002820	negative regulation of adaptive immune response	3/74	59/18723	0.00164377	0.0110166	0.00713433	XCL1/IL2/IL4	3
GO:0070304	GO:0070304	positive regulation of stress-activated protein kinase signaling cascade	4/74	128/18723	0.00165715	0.0110745	0.00717185	TNF/TRAF1/TRAF4/GADD45B	4
GO:0070374	GO:0070374	positive regulation of ERK1 and ERK2 cascade	5/74	217/18723	0.00168157	0.0111953	0.00725006	XCL1/CFLAR/TNF/CCL1/CCL4	5
GO:0050673	GO:0050673	epithelial cell proliferation	7/74	437/18723	0.00168479	0.0111953	0.00725006	ID2/CFLAR/TNF/MYC/NR4A3/RGCC/ZFP36L1	7
GO:0043280	GO:0043280	positive regulation of cysteine-type endopeptidase activity involved in apoptotic process	4/74	129/18723	0.00170512	0.0112982	0.00731673	BCL2L11/CFLAR/TNF/MYC	4
GO:0042306	GO:0042306	regulation of protein import into nucleus	3/74	60/18723	0.00172541	0.0114003	0.00738287	HSP90AB1/NOLC1/IFNG	3
GO:0002830	GO:0002830	positive regulation of type 2 immune response	2/74	16/18723	0.00178413	0.0116242	0.00752784	XCL1/IL4	2
GO:0045342	GO:0045342	MHC class II biosynthetic process	2/74	16/18723	0.00178413	0.0116242	0.00752784	IL4/IFNG	2
GO:0051044	GO:0051044	positive regulation of membrane protein ectodomain proteolysis	2/74	16/18723	0.00178413	0.0116242	0.00752784	TNF/IFNG	2
GO:0051770	GO:0051770	positive regulation of nitric-oxide synthase biosynthetic process	2/74	16/18723	0.00178413	0.0116242	0.00752784	NAMPT/IFNG	2
GO:0097284	GO:0097284	hepatocyte apoptotic process	2/74	16/18723	0.00178413	0.0116242	0.00752784	CFLAR/BCL2L1	2
GO:0071384	GO:0071384	cellular response to corticosteroid stimulus	3/74	61/18723	0.00180953	0.0117569	0.0076138	BCL2L11/CFLAR/ZFP36L1	3
GO:0051235	GO:0051235	maintenance of location	6/74	327/18723	0.00185342	0.0119845	0.00776117	XCL1/IL13/TNF/INSIG1/SRGN/NFKBIA	6
GO:0007569	GO:0007569	cell aging	4/74	132/18723	0.00185481	0.0119845	0.00776117	LMNA/ID2/NAMPT/MAP2K3	4
GO:0032623	GO:0032623	interleukin-2 production	3/74	62/18723	0.00189618	0.0120849	0.0078262	XCL1/IRF4/PRNP	3
GO:0032663	GO:0032663	regulation of interleukin-2 production	3/74	62/18723	0.00189618	0.0120849	0.0078262	XCL1/IRF4/PRNP	3
GO:0045428	GO:0045428	regulation of nitric oxide biosynthetic process	3/74	62/18723	0.00189618	0.0120849	0.0078262	TNF/HSP90AB1/IFNG	3
GO:0045576	GO:0045576	mast cell activation	3/74	62/18723	0.00189618	0.0120849	0.0078262	IL13/IL4/NR4A3	3
GO:1903078	GO:1903078	positive regulation of protein localization to plasma membrane	3/74	62/18723	0.00189618	0.0120849	0.0078262	TNF/PRNP/IFNG	3
GO:0046328	GO:0046328	regulation of JNK cascade	4/74	133/18723	0.00190666	0.0121187	0.00784808	TNF/TRAF1/TRAF4/GADD45B	4
GO:0032147	GO:0032147	activation of protein kinase activity	4/74	134/18723	0.00195952	0.0123884	0.00802275	IL4/RGCC/TRAF4/PRNP	4
GO:0019216	GO:0019216	regulation of lipid metabolic process	6/74	331/18723	0.00197029	0.0123884	0.00802275	ID2/TNF/INSIG1/FABP5/NR4A3/IFNG	6
GO:0071214	GO:0071214	cellular response to abiotic stimulus	6/74	331/18723	0.00197029	0.0123884	0.00802275	IL13/NAMPT/MYC/ZFP36L1/BCL2L1/TNFSF14	6
GO:0104004	GO:0104004	cellular response to environmental stimulus	6/74	331/18723	0.00197029	0.0123884	0.00802275	IL13/NAMPT/MYC/ZFP36L1/BCL2L1/TNFSF14	6
GO:0046902	GO:0046902	regulation of mitochondrial membrane permeability	3/74	63/18723	0.00198538	0.0124166	0.00804098	BCL2L11/GZMB/BCL2L1	3
GO:1904589	GO:1904589	regulation of protein import	3/74	63/18723	0.00198538	0.0124166	0.00804098	HSP90AB1/NOLC1/IFNG	3
GO:1903541	GO:1903541	regulation of exosomal secretion	2/74	17/18723	0.00201686	0.0125798	0.00814668	SDC4/IFNG	2
GO:0062012	GO:0062012	regulation of small molecule metabolic process	6/74	334/18723	0.00206154	0.0127854	0.00827983	IL4/TNF/INSIG1/FABP5/NR4A3/IFNG	6
GO:1900180	GO:1900180	regulation of protein localization to nucleus	4/74	136/18723	0.00206825	0.0127854	0.00827983	LMNA/HSP90AB1/NOLC1/IFNG	4
GO:0045670	GO:0045670	regulation of osteoclast differentiation	3/74	64/18723	0.00207715	0.0127854	0.00827983	IL4/TNF/IFNG	3
GO:0048247	GO:0048247	lymphocyte chemotaxis	3/74	64/18723	0.00207715	0.0127854	0.00827983	XCL1/CCL1/CCL4	3
GO:0080164	GO:0080164	regulation of nitric oxide metabolic process	3/74	64/18723	0.00207715	0.0127854	0.00827983	TNF/HSP90AB1/IFNG	3
GO:0045444	GO:0045444	fat cell differentiation	5/74	229/18723	0.00212716	0.0130588	0.00845691	ID2/TNF/INSIG1/NR4A3/ZFP36L1	5
GO:0030595	GO:0030595	leukocyte chemotaxis	5/74	230/18723	0.00216782	0.0132737	0.00859602	XCL1/IL4/NINJ1/CCL1/CCL4	5
GO:0007568	GO:0007568	aging	6/74	339/18723	0.0022207	0.0135359	0.00876582	LMNA/ID2/NAMPT/BCL2A1/MAP2K3/PRNP	6
GO:0045598	GO:0045598	regulation of fat cell differentiation	4/74	139/18723	0.00223908	0.0135359	0.00876582	ID2/TNF/INSIG1/ZFP36L1	4
GO:0002923	GO:0002923	regulation of humoral immune response mediated by circulating immunoglobulin	2/74	18/18723	0.00226317	0.0135359	0.00876582	LTA/TNF	2
GO:0035743	GO:0035743	CD4-positive, alpha-beta T cell cytokine production	2/74	18/18723	0.00226317	0.0135359	0.00876582	XCL1/IL4	2
GO:0045623	GO:0045623	negative regulation of T-helper cell differentiation	2/74	18/18723	0.00226317	0.0135359	0.00876582	IL2/IL4	2
GO:0071800	GO:0071800	podosome assembly	2/74	18/18723	0.00226317	0.0135359	0.00876582	CSF2/TNF	2
GO:0002562	GO:0002562	somatic diversification of immune receptors via germline recombination within a single locus	3/74	66/18723	0.00226851	0.0135359	0.00876582	IL2/IL4/CD40LG	3
GO:0014015	GO:0014015	positive regulation of gliogenesis	3/74	66/18723	0.00226851	0.0135359	0.00876582	ID2/LTA/TNF	3
GO:0016444	GO:0016444	somatic cell DNA recombination	3/74	66/18723	0.00226851	0.0135359	0.00876582	IL2/IL4/CD40LG	3
GO:2000573	GO:2000573	positive regulation of DNA biosynthetic process	3/74	66/18723	0.00226851	0.0135359	0.00876582	HSP90AB1/MYC/RGCC	3
GO:0050921	GO:0050921	positive regulation of chemotaxis	4/74	141/18723	0.00235823	0.0139877	0.00905844	XCL1/IL4/CCL1/CCL4	4
GO:0016445	GO:0016445	somatic diversification of immunoglobulins	3/74	67/18723	0.00236816	0.0139877	0.00905844	IL2/IL4/CD40LG	3
GO:0050435	GO:0050435	amyloid-beta metabolic process	3/74	67/18723	0.00236816	0.0139877	0.00905844	TNF/PRNP/IFNG	3
GO:1902117	GO:1902117	positive regulation of organelle assembly	3/74	67/18723	0.00236816	0.0139877	0.00905844	CSF2/TNF/SDC4	3
GO:0031640	GO:0031640	killing of cells of other organism	3/74	68/18723	0.00247048	0.0144638	0.00936675	SERPINB9/BCL2L1/IFNG	3
GO:0042267	GO:0042267	natural killer cell mediated cytotoxicity	3/74	68/18723	0.00247048	0.0144638	0.00936675	PRDX1/SERPINB9/GZMB	3
GO:0042987	GO:0042987	amyloid precursor protein catabolic process	3/74	68/18723	0.00247048	0.0144638	0.00936675	TNF/PRNP/IFNG	3
GO:0002764	GO:0002764	immune response-regulating signaling pathway	7/74	468/18723	0.00247895	0.0144638	0.00936675	IRF4/NINJ1/NR4A3/BIRC3/NFKBIA/PRNP/NFKBID	7
GO:0062013	GO:0062013	positive regulation of small molecule metabolic process	4/74	143/18723	0.00248168	0.0144638	0.00936675	IL4/TNF/NR4A3/IFNG	4
GO:0010829	GO:0010829	negative regulation of glucose transmembrane transport	2/74	19/18723	0.00252297	0.0144638	0.00936675	TNF/FABP5	2
GO:0032616	GO:0032616	interleukin-13 production	2/74	19/18723	0.00252297	0.0144638	0.00936675	IL4/IRF4	2
GO:0032656	GO:0032656	regulation of interleukin-13 production	2/74	19/18723	0.00252297	0.0144638	0.00936675	IL4/IRF4	2
GO:0044003	GO:0044003	modulation by symbiont of host process	2/74	19/18723	0.00252297	0.0144638	0.00936675	SERPINB9/BCL2L1	2
GO:0140131	GO:0140131	positive regulation of lymphocyte chemotaxis	2/74	19/18723	0.00252297	0.0144638	0.00936675	XCL1/CCL4	2
GO:1901739	GO:1901739	regulation of myoblast fusion	2/74	19/18723	0.00252297	0.0144638	0.00936675	CFLAR/IL4	2
GO:2001185	GO:2001185	regulation of CD8-positive, alpha-beta T cell activation	2/74	19/18723	0.00252297	0.0144638	0.00936675	XCL1/VSIR	2
GO:0010821	GO:0010821	regulation of mitochondrion organization	4/74	144/18723	0.00254504	0.0145547	0.0094256	LMNA/BCL2L11/GZMB/BCL2L1	4
GO:0050810	GO:0050810	regulation of steroid biosynthetic process	3/74	69/18723	0.0025755	0.0146572	0.00949199	TNF/INSIG1/IFNG	3
GO:1904377	GO:1904377	positive regulation of protein localization to cell periphery	3/74	69/18723	0.0025755	0.0146572	0.00949199	TNF/PRNP/IFNG	3
GO:0045861	GO:0045861	negative regulation of proteolysis	6/74	351/18723	0.00264056	0.0149909	0.00970813	SERPINB9/TNF/HSP90AB1/BIRC3/PRNP/TNFSF14	6
GO:0002548	GO:0002548	monocyte chemotaxis	3/74	70/18723	0.00268325	0.0151964	0.00984119	XCL1/CCL1/CCL4	3
GO:0002228	GO:0002228	natural killer cell mediated immunity	3/74	71/18723	0.00279374	0.0154629	0.0100138	PRDX1/SERPINB9/GZMB	3
GO:0009110	GO:0009110	vitamin biosynthetic process	2/74	20/18723	0.00279615	0.0154629	0.0100138	TNF/IFNG	2
GO:0010893	GO:0010893	positive regulation of steroid biosynthetic process	2/74	20/18723	0.00279615	0.0154629	0.0100138	TNF/IFNG	2
GO:0042359	GO:0042359	vitamin D metabolic process	2/74	20/18723	0.00279615	0.0154629	0.0100138	TNF/IFNG	2
GO:0060252	GO:0060252	positive regulation of glial cell proliferation	2/74	20/18723	0.00279615	0.0154629	0.0100138	LTA/TNF	2
GO:0090201	GO:0090201	negative regulation of release of cytochrome c from mitochondria	2/74	20/18723	0.00279615	0.0154629	0.0100138	LMNA/BCL2L1	2
GO:1902004	GO:1902004	positive regulation of amyloid-beta formation	2/74	20/18723	0.00279615	0.0154629	0.0100138	TNF/IFNG	2
GO:1990182	GO:1990182	exosomal secretion	2/74	20/18723	0.00279615	0.0154629	0.0100138	SDC4/IFNG	2
GO:2000010	GO:2000010	positive regulation of protein localization to cell surface	2/74	20/18723	0.00279615	0.0154629	0.0100138	TNF/HSP90AB1	2
GO:0051384	GO:0051384	response to glucocorticoid	4/74	148/18723	0.00280963	0.0154629	0.0100138	BCL2L11/CFLAR/TNF/ZFP36L1	4
GO:0097530	GO:0097530	granulocyte migration	4/74	148/18723	0.00280963	0.0154629	0.0100138	XCL1/IL4/CCL1/CCL4	4
GO:2001056	GO:2001056	positive regulation of cysteine-type endopeptidase activity	4/74	148/18723	0.00280963	0.0154629	0.0100138	BCL2L11/CFLAR/TNF/MYC	4
GO:0051402	GO:0051402	neuron apoptotic process	5/74	246/18723	0.00289854	0.0159147	0.0103064	BCL2L11/TNF/HSP90AB1/PRNP/BCL2L1	5
GO:0070227	GO:0070227	lymphocyte apoptotic process	3/74	72/18723	0.002907	0.0159238	0.0103123	BCL2L11/IL2/IL2RA	3
GO:0043299	GO:0043299	leukocyte degranulation	3/74	73/18723	0.00302305	0.0164823	0.010674	IL13/IL4/NR4A3	3
GO:0050848	GO:0050848	regulation of calcium-mediated signaling	3/74	73/18723	0.00302305	0.0164823	0.010674	TNF/PRNP/CCL4	3
GO:0045655	GO:0045655	regulation of monocyte differentiation	2/74	21/18723	0.00308259	0.0165523	0.0107193	MYC/ZFP36L1	2
GO:0051767	GO:0051767	nitric-oxide synthase biosynthetic process	2/74	21/18723	0.00308259	0.0165523	0.0107193	NAMPT/IFNG	2
GO:0051769	GO:0051769	regulation of nitric-oxide synthase biosynthetic process	2/74	21/18723	0.00308259	0.0165523	0.0107193	NAMPT/IFNG	2
GO:0061081	GO:0061081	positive regulation of myeloid leukocyte cytokine production involved in immune response	2/74	21/18723	0.00308259	0.0165523	0.0107193	NR4A3/DDX21	2
GO:0072111	GO:0072111	cell proliferation involved in kidney development	2/74	21/18723	0.00308259	0.0165523	0.0107193	CFLAR/MYC	2
GO:0097734	GO:0097734	extracellular exosome biogenesis	2/74	21/18723	0.00308259	0.0165523	0.0107193	SDC4/IFNG	2
GO:0050871	GO:0050871	positive regulation of B cell activation	4/74	152/18723	0.0030925	0.0165523	0.0107193	TNFRSF4/IL2/IL13/IL4	4
GO:0051092	GO:0051092	positive regulation of NF-kappaB transcription factor activity	4/74	152/18723	0.0030925	0.0165523	0.0107193	CFLAR/TNF/CD40LG/TRAF1	4
GO:0071560	GO:0071560	cellular response to transforming growth factor beta stimulus	5/74	250/18723	0.00310607	0.016587	0.0107417	XCL1/CFLAR/IL4/HSP90AB1/ZFP36L1	5
GO:0010951	GO:0010951	negative regulation of endopeptidase activity	5/74	252/18723	0.00321377	0.017123	0.0110889	SERPINB9/TNF/BIRC3/PRNP/TNFSF14	5
GO:0034121	GO:0034121	regulation of toll-like receptor signaling pathway	3/74	75/18723	0.00326362	0.0173491	0.0112353	IRF4/NINJ1/BIRC3	3
GO:0043371	GO:0043371	negative regulation of CD4-positive, alpha-beta T cell differentiation	2/74	22/18723	0.0033822	0.0178893	0.0115851	IL2/IL4	2
GO:0044346	GO:0044346	fibroblast apoptotic process	2/74	22/18723	0.0033822	0.0178893	0.0115851	BCL2L11/MYC	2
GO:0006809	GO:0006809	nitric oxide biosynthetic process	3/74	76/18723	0.00338819	0.0178893	0.0115851	TNF/HSP90AB1/IFNG	3
GO:0071559	GO:0071559	response to transforming growth factor beta	5/74	256/18723	0.00343723	0.0181074	0.0117264	XCL1/CFLAR/IL4/HSP90AB1/ZFP36L1	5
GO:0002262	GO:0002262	myeloid cell homeostasis	4/74	157/18723	0.00347271	0.0182532	0.0118208	PRDX1/ID2/BCL2L11/ZFP36L1	4
GO:0002200	GO:0002200	somatic diversification of immune receptors	3/74	77/18723	0.00351563	0.0183142	0.0118603	IL2/IL4/CD40LG	3
GO:0007492	GO:0007492	endoderm development	3/74	77/18723	0.00351563	0.0183142	0.0118603	DUSP2/DUSP4/ZFP36L1	3
GO:0010827	GO:0010827	regulation of glucose transmembrane transport	3/74	77/18723	0.00351563	0.0183142	0.0118603	TNF/FABP5/NR4A3	3
GO:0032418	GO:0032418	lysosome localization	3/74	77/18723	0.00351563	0.0183142	0.0118603	IL13/IL4/NR4A3	3
GO:0031348	GO:0031348	negative regulation of defense response	5/74	258/18723	0.00355307	0.018468	0.0119599	IL2/IL13/IL4/SERPINB9/IL2RA	5
GO:0090559	GO:0090559	regulation of membrane permeability	3/74	78/18723	0.00364597	0.0189089	0.0122454	BCL2L11/GZMB/BCL2L1	3
GO:0051091	GO:0051091	positive regulation of DNA-binding transcription factor activity	5/74	260/18723	0.00367168	0.0190002	0.0123045	CFLAR/TNF/CD40LG/TRAF1/RGCC	5
GO:0010888	GO:0010888	negative regulation of lipid storage	2/74	23/18723	0.00369488	0.0190359	0.0123277	TNF/NFKBIA	2
GO:0140112	GO:0140112	extracellular vesicle biogenesis	2/74	23/18723	0.00369488	0.0190359	0.0123277	SDC4/IFNG	2
GO:0010466	GO:0010466	negative regulation of peptidase activity	5/74	262/18723	0.00379313	0.0194992	0.0126277	SERPINB9/TNF/BIRC3/PRNP/TNFSF14	5
GO:0048145	GO:0048145	regulation of fibroblast proliferation	3/74	80/18723	0.00391544	0.0200838	0.0130063	IL13/LTA/MYC	3
GO:0050678	GO:0050678	regulation of epithelial cell proliferation	6/74	381/18723	0.00395053	0.0202194	0.0130941	CFLAR/TNF/MYC/NR4A3/RGCC/ZFP36L1	6
GO:0051607	GO:0051607	defense response to virus	5/74	265/18723	0.00398066	0.0202644	0.0131232	IL4/BIRC3/DDX21/BCL2L1/IFNG	5
GO:0140546	GO:0140546	defense response to symbiont	5/74	265/18723	0.00398066	0.0202644	0.0131232	IL4/BIRC3/DDX21/BCL2L1/IFNG	5
GO:0002726	GO:0002726	positive regulation of T cell cytokine production	2/74	24/18723	0.0040205	0.0202644	0.0131232	XCL1/IL4	2
GO:0002922	GO:0002922	positive regulation of humoral immune response	2/74	24/18723	0.0040205	0.0202644	0.0131232	LTA/TNF	2
GO:0043302	GO:0043302	positive regulation of leukocyte degranulation	2/74	24/18723	0.0040205	0.0202644	0.0131232	IL13/IL4	2
GO:0051043	GO:0051043	regulation of membrane protein ectodomain proteolysis	2/74	24/18723	0.0040205	0.0202644	0.0131232	TNF/IFNG	2
GO:2000353	GO:2000353	positive regulation of endothelial cell apoptotic process	2/74	24/18723	0.0040205	0.0202644	0.0131232	CD40LG/RGCC	2
GO:0046209	GO:0046209	nitric oxide metabolic process	3/74	81/18723	0.0040546	0.0202644	0.0131232	TNF/HSP90AB1/IFNG	3
GO:0048144	GO:0048144	fibroblast proliferation	3/74	81/18723	0.0040546	0.0202644	0.0131232	IL13/LTA/MYC	3
GO:0048708	GO:0048708	astrocyte differentiation	3/74	81/18723	0.0040546	0.0202644	0.0131232	ID2/TNF/IFNG	3
GO:0051817	GO:0051817	modulation of process of other organism involved in symbiotic interaction	3/74	81/18723	0.0040546	0.0202644	0.0131232	SERPINB9/BCL2L1/CCL4	3
GO:0042692	GO:0042692	muscle cell differentiation	6/74	384/18723	0.004104	0.0204675	0.0132548	LMNA/ID2/CFLAR/IL4/NINJ1/KDM6B	6
GO:0002312	GO:0002312	B cell activation involved in immune response	3/74	82/18723	0.00419675	0.020797	0.0134682	IL2/IL4/CD40LG	3
GO:0008625	GO:0008625	extrinsic apoptotic signaling pathway via death domain receptors	3/74	82/18723	0.00419675	0.020797	0.0134682	CFLAR/TNF/BCL2L1	3
GO:2001057	GO:2001057	reactive nitrogen species metabolic process	3/74	82/18723	0.00419675	0.020797	0.0134682	TNF/HSP90AB1/IFNG	3
GO:0007254	GO:0007254	JNK cascade	4/74	167/18723	0.00432629	0.0212853	0.0137843	TNF/TRAF1/TRAF4/GADD45B	4
GO:0031960	GO:0031960	response to corticosteroid	4/74	167/18723	0.00432629	0.0212853	0.0137843	BCL2L11/CFLAR/TNF/ZFP36L1	4
GO:0048143	GO:0048143	astrocyte activation	2/74	25/18723	0.00435897	0.0212853	0.0137843	TNF/IFNG	2
GO:0070423	GO:0070423	nucleotide-binding oligomerization domain containing signaling pathway	2/74	25/18723	0.00435897	0.0212853	0.0137843	BIRC3/NFKBIA	2
GO:1901623	GO:1901623	regulation of lymphocyte chemotaxis	2/74	25/18723	0.00435897	0.0212853	0.0137843	XCL1/CCL4	2
GO:1902993	GO:1902993	positive regulation of amyloid precursor protein catabolic process	2/74	25/18723	0.00435897	0.0212853	0.0137843	TNF/IFNG	2
GO:1903055	GO:1903055	positive regulation of extracellular matrix organization	2/74	25/18723	0.00435897	0.0212853	0.0137843	CFLAR/RGCC	2
GO:0042176	GO:0042176	regulation of protein catabolic process	6/74	391/18723	0.0044793	0.0218272	0.0141353	PLK3/ODC1/TNF/HSP90AB1/RNF19A/IFNG	6
GO:0010921	GO:0010921	regulation of phosphatase activity	3/74	84/18723	0.00449005	0.0218342	0.0141398	TNF/HSP90AB1/IFNG	3
GO:0046890	GO:0046890	regulation of lipid biosynthetic process	4/74	171/18723	0.00470409	0.022669	0.0146805	TNF/INSIG1/FABP5/IFNG	4
GO:0035872	GO:0035872	nucleotide-binding domain, leucine rich repeat containing receptor signaling pathway	2/74	26/18723	0.00471019	0.022669	0.0146805	BIRC3/NFKBIA	2
GO:0045672	GO:0045672	positive regulation of osteoclast differentiation	2/74	26/18723	0.00471019	0.022669	0.0146805	TNF/IFNG	2
GO:0046639	GO:0046639	negative regulation of alpha-beta T cell differentiation	2/74	26/18723	0.00471019	0.022669	0.0146805	IL2/IL4	2
GO:0060544	GO:0060544	regulation of necroptotic process	2/74	26/18723	0.00471019	0.022669	0.0146805	CFLAR/BIRC3	2
GO:1903829	GO:1903829	positive regulation of cellular protein localization	5/74	276/18723	0.0047254	0.0226955	0.0146976	TNF/HSP90AB1/GZMB/PRNP/IFNG	5
GO:0002221	GO:0002221	pattern recognition receptor signaling pathway	4/74	172/18723	0.0048019	0.0230157	0.014905	IRF4/NINJ1/BIRC3/NFKBIA	4
GO:0002719	GO:0002719	negative regulation of cytokine production involved in immune response	2/74	27/18723	0.00507405	0.0239762	0.015527	XCL1/TNF	2
GO:0032703	GO:0032703	negative regulation of interleukin-2 production	2/74	27/18723	0.00507405	0.0239762	0.015527	XCL1/PRNP	2
GO:0042104	GO:0042104	positive regulation of activated T cell proliferation	2/74	27/18723	0.00507405	0.0239762	0.015527	IL2/IL2RA	2
GO:0045830	GO:0045830	positive regulation of isotype switching	2/74	27/18723	0.00507405	0.0239762	0.015527	IL2/IL4	2
GO:0060142	GO:0060142	regulation of syncytium formation by plasma membrane fusion	2/74	27/18723	0.00507405	0.0239762	0.015527	CFLAR/IL4	2
GO:0060333	GO:0060333	interferon-gamma-mediated signaling pathway	2/74	27/18723	0.00507405	0.0239762	0.015527	HSP90AB1/IFNG	2
GO:0071624	GO:0071624	positive regulation of granulocyte chemotaxis	2/74	27/18723	0.00507405	0.0239762	0.015527	XCL1/IL4	2
GO:0070098	GO:0070098	chemokine-mediated signaling pathway	3/74	88/18723	0.00511322	0.0241126	0.0156153	XCL1/CCL1/CCL4	3
GO:1903532	GO:1903532	positive regulation of secretion by cell	5/74	282/18723	0.00517101	0.024336	0.01576	IL13/IL4/RGCC/SDC4/IFNG	5
GO:0050728	GO:0050728	negative regulation of inflammatory response	4/74	176/18723	0.00520683	0.0244554	0.0158373	IL2/IL13/IL4/IL2RA	4
GO:0072659	GO:0072659	protein localization to plasma membrane	5/74	284/18723	0.00532596	0.0249648	0.0161672	TNF/RILPL2/PRNP/BCL2L1/IFNG	5
GO:0010464	GO:0010464	regulation of mesenchymal cell proliferation	2/74	28/18723	0.00545046	0.0253956	0.0164462	LMNA/MYC	2
GO:0010714	GO:0010714	positive regulation of collagen metabolic process	2/74	28/18723	0.00545046	0.0253956	0.0164462	VSIR/RGCC	2
GO:0061082	GO:0061082	myeloid leukocyte cytokine production	2/74	28/18723	0.00545046	0.0253956	0.0164462	NR4A3/DDX21	2
GO:0034504	GO:0034504	protein localization to nucleus	5/74	290/18723	0.00581057	0.0269661	0.0174633	LMNA/HSP90AB1/NOLC1/NFKBIA/IFNG	5
GO:0044403	GO:0044403	biological process involved in symbiotic interaction	5/74	290/18723	0.00581057	0.0269661	0.0174633	TNFRSF4/SERPINB9/HSP90AB1/BCL2L1/CCL4	5
GO:0062098	GO:0062098	regulation of programmed necrotic cell death	2/74	29/18723	0.00583929	0.0270458	0.0175148	CFLAR/BIRC3	2
GO:0016032	GO:0016032	viral process	6/74	415/18723	0.00596046	0.0274518	0.0177778	TNFRSF4/TNF/HSP90AB1/CCL1/BCL2L1/CCL4	6
GO:0019217	GO:0019217	regulation of fatty acid metabolic process	3/74	93/18723	0.00596217	0.0274518	0.0177778	INSIG1/FABP5/NR4A3	3
GO:0090398	GO:0090398	cellular senescence	3/74	93/18723	0.00596217	0.0274518	0.0177778	ID2/NAMPT/MAP2K3	3
GO:0010632	GO:0010632	regulation of epithelial cell migration	5/74	292/18723	0.00597881	0.0274744	0.0177924	IL4/TNF/RGCC/MAP2K3/IFNG	5
GO:0030316	GO:0030316	osteoclast differentiation	3/74	94/18723	0.00614145	0.0281112	0.0182048	IL4/TNF/IFNG	3
GO:0045185	GO:0045185	maintenance of protein location	3/74	94/18723	0.00614145	0.0281112	0.0182048	INSIG1/SRGN/NFKBIA	3
GO:0007369	GO:0007369	gastrulation	4/74	185/18723	0.00620033	0.0283253	0.0183435	DUSP2/DUSP4/NR4A3/KDM6B	4
GO:0043304	GO:0043304	regulation of mast cell degranulation	2/74	30/18723	0.00624047	0.0283426	0.0183547	IL13/IL4	2
GO:0045940	GO:0045940	positive regulation of steroid metabolic process	2/74	30/18723	0.00624047	0.0283426	0.0183547	TNF/IFNG	2
GO:0048147	GO:0048147	negative regulation of fibroblast proliferation	2/74	30/18723	0.00624047	0.0283426	0.0183547	LTA/MYC	2
GO:0032102	GO:0032102	negative regulation of response to external stimulus	6/74	420/18723	0.00630936	0.0286	0.0185214	IL2/IL13/IL4/SERPINB9/TNF/IL2RA	6
GO:0042982	GO:0042982	amyloid precursor protein metabolic process	3/74	95/18723	0.00632393	0.0286106	0.0185282	TNF/PRNP/IFNG	3
GO:0002828	GO:0002828	regulation of type 2 immune response	2/74	31/18723	0.00665388	0.0298722	0.0193452	XCL1/IL4	2
GO:0033006	GO:0033006	regulation of mast cell activation involved in immune response	2/74	31/18723	0.00665388	0.0298722	0.0193452	IL13/IL4	2
GO:0048566	GO:0048566	embryonic digestive tract development	2/74	31/18723	0.00665388	0.0298722	0.0193452	ID2/TNF	2
GO:1902042	GO:1902042	negative regulation of extrinsic apoptotic signaling pathway via death domain receptors	2/74	31/18723	0.00665388	0.0298722	0.0193452	CFLAR/BCL2L1	2
GO:1990868	GO:1990868	response to chemokine	3/74	97/18723	0.00669854	0.0299577	0.0194006	XCL1/CCL1/CCL4	3
GO:1990869	GO:1990869	cellular response to chemokine	3/74	97/18723	0.00669854	0.0299577	0.0194006	XCL1/CCL1/CCL4	3
GO:0048568	GO:0048568	embryonic organ development	6/74	427/18723	0.0068226	0.0304543	0.0197222	ID2/IL3/CSF2/TNF/INSIG1/ZFP36L1	6
GO:0010743	GO:0010743	regulation of macrophage derived foam cell differentiation	2/74	32/18723	0.00707942	0.031302	0.0202712	CSF2/NFKBIA	2
GO:0019835	GO:0019835	cytolysis	2/74	32/18723	0.00707942	0.031302	0.0202712	NINJ1/GZMB	2
GO:0043372	GO:0043372	positive regulation of CD4-positive, alpha-beta T cell differentiation	2/74	32/18723	0.00707942	0.031302	0.0202712	NFKBID/IFNG	2
GO:0050850	GO:0050850	positive regulation of calcium-mediated signaling	2/74	32/18723	0.00707942	0.031302	0.0202712	TNF/CCL4	2
GO:1902235	GO:1902235	regulation of endoplasmic reticulum stress-induced intrinsic apoptotic signaling pathway	2/74	32/18723	0.00707942	0.031302	0.0202712	BCL2L11/BCL2L1	2
GO:0019218	GO:0019218	regulation of steroid metabolic process	3/74	100/18723	0.00728481	0.0321494	0.0208199	TNF/INSIG1/IFNG	3
GO:0050777	GO:0050777	negative regulation of immune response	4/74	194/18723	0.00731278	0.032212	0.0208605	XCL1/IL2/IL4/SERPINB9	4
GO:0050830	GO:0050830	defense response to Gram-positive bacterium	3/74	101/18723	0.00748678	0.0329165	0.0213167	LTA/TNF/TNFSF8	3
GO:0071353	GO:0071353	cellular response to interleukin-4	2/74	33/18723	0.007517	0.0329256	0.0213226	XCL1/HSP90AB1	2
GO:1904031	GO:1904031	positive regulation of cyclin-dependent protein kinase activity	2/74	33/18723	0.007517	0.0329256	0.0213226	HSP90AB1/RGCC	2
GO:0051047	GO:0051047	positive regulation of secretion	5/74	310/18723	0.00765089	0.033387	0.0216214	IL13/IL4/RGCC/SDC4/IFNG	5
GO:0060326	GO:0060326	cell chemotaxis	5/74	310/18723	0.00765089	0.033387	0.0216214	XCL1/IL4/NINJ1/CCL1/CCL4	5
GO:0010522	GO:0010522	regulation of calcium ion transport into cytosol	3/74	102/18723	0.00769204	0.0335041	0.0216972	XCL1/IL13/PRNP	3
GO:0014013	GO:0014013	regulation of gliogenesis	3/74	103/18723	0.00790061	0.0341902	0.0221416	ID2/LTA/TNF	3
GO:0030593	GO:0030593	neutrophil chemotaxis	3/74	103/18723	0.00790061	0.0341902	0.0221416	XCL1/CCL1/CCL4	3
GO:0046425	GO:0046425	regulation of receptor signaling pathway via JAK-STAT	3/74	103/18723	0.00790061	0.0341902	0.0221416	IL4/TNF/IFNG	3
GO:0010922	GO:0010922	positive regulation of phosphatase activity	2/74	34/18723	0.00796652	0.0341902	0.0221416	HSP90AB1/IFNG	2
GO:0032770	GO:0032770	positive regulation of monooxygenase activity	2/74	34/18723	0.00796652	0.0341902	0.0221416	TNF/IFNG	2
GO:0051973	GO:0051973	positive regulation of telomerase activity	2/74	34/18723	0.00796652	0.0341902	0.0221416	HSP90AB1/MYC	2
GO:0070884	GO:0070884	regulation of calcineurin-NFAT signaling cascade	2/74	34/18723	0.00796652	0.0341902	0.0221416	TNF/PRNP	2
GO:2000352	GO:2000352	negative regulation of endothelial cell apoptotic process	2/74	34/18723	0.00796652	0.0341902	0.0221416	IL13/IL4	2
GO:0071902	GO:0071902	positive regulation of protein serine/threonine kinase activity	4/74	200/18723	0.00812331	0.0347993	0.022536	TNF/HSP90AB1/RGCC/IFNG	4
GO:0062207	GO:0062207	regulation of pattern recognition receptor signaling pathway	3/74	105/18723	0.00832772	0.0356098	0.0230609	IRF4/NINJ1/BIRC3	3
GO:0010506	GO:0010506	regulation of autophagy	5/74	317/18723	0.00838137	0.0357116	0.0231268	PLK3/BCL2L11/IL4/NAMPT/IFNG	5
GO:0017157	GO:0017157	regulation of exocytosis	4/74	202/18723	0.00840608	0.0357116	0.0231268	IL13/IL4/SDC4/IFNG	4
GO:0046640	GO:0046640	regulation of alpha-beta T cell proliferation	2/74	35/18723	0.00842787	0.0357116	0.0231268	XCL1/VSIR	2
GO:0106056	GO:0106056	regulation of calcineurin-mediated signaling	2/74	35/18723	0.00842787	0.0357116	0.0231268	TNF/PRNP	2
GO:2000403	GO:2000403	positive regulation of lymphocyte migration	2/74	35/18723	0.00842787	0.0357116	0.0231268	XCL1/CCL4	2
GO:0006766	GO:0006766	vitamin metabolic process	3/74	106/18723	0.00854629	0.0359528	0.023283	MTHFD2/TNF/IFNG	3
GO:0046822	GO:0046822	regulation of nucleocytoplasmic transport	3/74	106/18723	0.00854629	0.0359528	0.023283	HSP90AB1/NOLC1/IFNG	3
GO:0071887	GO:0071887	leukocyte apoptotic process	3/74	106/18723	0.00854629	0.0359528	0.023283	BCL2L11/IL2/IL2RA	3
GO:2000278	GO:2000278	regulation of DNA biosynthetic process	3/74	106/18723	0.00854629	0.0359528	0.023283	HSP90AB1/MYC/RGCC	3
GO:0007204	GO:0007204	positive regulation of cytosolic calcium ion concentration	5/74	319/18723	0.00859868	0.0361083	0.0233837	XCL1/IL2/IL13/CCL1/PRNP	5
GO:0071383	GO:0071383	cellular response to steroid hormone stimulus	4/74	204/18723	0.00869524	0.0364483	0.0236039	BCL2L11/CFLAR/NR4A3/ZFP36L1	4
GO:0051341	GO:0051341	regulation of oxidoreductase activity	3/74	107/18723	0.0087682	0.0366884	0.0237594	IL13/TNF/IFNG	3
GO:0042092	GO:0042092	type 2 immune response	2/74	36/18723	0.00890096	0.0369793	0.0239478	XCL1/IL4	2
GO:0045191	GO:0045191	regulation of isotype switching	2/74	36/18723	0.00890096	0.0369793	0.0239478	IL2/IL4	2
GO:0060251	GO:0060251	regulation of glial cell proliferation	2/74	36/18723	0.00890096	0.0369793	0.0239478	LTA/TNF	2
GO:0070670	GO:0070670	response to interleukin-4	2/74	36/18723	0.00890096	0.0369793	0.0239478	XCL1/HSP90AB1	2
GO:0033138	GO:0033138	positive regulation of peptidyl-serine phosphorylation	3/74	108/18723	0.00899348	0.0372974	0.0241538	TNF/HSP90AB1/IFNG	3
GO:0007346	GO:0007346	regulation of mitotic cell cycle	6/74	457/18723	0.00937118	0.0386499	0.0250297	PLK3/ID2/TNF/RGCC/ZFP36L1/PIM3	6
GO:0002369	GO:0002369	T cell cytokine production	2/74	37/18723	0.0093857	0.0386499	0.0250297	XCL1/IL4	2
GO:0002724	GO:0002724	regulation of T cell cytokine production	2/74	37/18723	0.0093857	0.0386499	0.0250297	XCL1/IL4	2
GO:0045616	GO:0045616	regulation of keratinocyte differentiation	2/74	37/18723	0.0093857	0.0386499	0.0250297	ZBED2/ZFP36L1	2
GO:1904659	GO:1904659	glucose transmembrane transport	3/74	110/18723	0.00945418	0.0388635	0.025168	TNF/FABP5/NR4A3	3
GO:0043491	GO:0043491	protein kinase B signaling	4/74	211/18723	0.00975844	0.0400438	0.0259324	PLK3/TNF/HSP90AB1/ZFP36L1	4
GO:0002385	GO:0002385	mucosal immune response	2/74	38/18723	0.00988198	0.0400588	0.0259421	XCL1/IL4	2
GO:0010742	GO:0010742	macrophage derived foam cell differentiation	2/74	38/18723	0.00988198	0.0400588	0.0259421	CSF2/NFKBIA	2
GO:0046633	GO:0046633	alpha-beta T cell proliferation	2/74	38/18723	0.00988198	0.0400588	0.0259421	XCL1/VSIR	2
GO:0071392	GO:0071392	cellular response to estradiol stimulus	2/74	38/18723	0.00988198	0.0400588	0.0259421	BCL2L11/CFLAR	2
GO:0090077	GO:0090077	foam cell differentiation	2/74	38/18723	0.00988198	0.0400588	0.0259421	CSF2/NFKBIA	2
GO:1902110	GO:1902110	positive regulation of mitochondrial membrane permeability involved in apoptotic process	2/74	38/18723	0.00988198	0.0400588	0.0259421	BCL2L11/GZMB	2
GO:1903580	GO:1903580	positive regulation of ATP metabolic process	2/74	38/18723	0.00988198	0.0400588	0.0259421	IL4/IFNG	2
GO:0010633	GO:0010633	negative regulation of epithelial cell migration	3/74	112/18723	0.00992846	0.0401776	0.026019	IL4/TNF/RGCC	3
GO:0071347	GO:0071347	cellular response to interleukin-1	3/74	113/18723	0.0101707	0.0410869	0.0266079	XCL1/CCL1/CCL4	3
GO:1990778	GO:1990778	protein localization to cell periphery	5/74	333/18723	0.0102305	0.0412198	0.026694	TNF/RILPL2/PRNP/BCL2L1/IFNG	5
GO:0051651	GO:0051651	maintenance of location in cell	4/74	214/18723	0.0102389	0.0412198	0.026694	XCL1/IL13/INSIG1/SRGN	4
GO:0002701	GO:0002701	negative regulation of production of molecular mediator of immune response	2/74	39/18723	0.0103897	0.0416478	0.0269711	XCL1/TNF	2
GO:0010463	GO:0010463	mesenchymal cell proliferation	2/74	39/18723	0.0103897	0.0416478	0.0269711	LMNA/MYC	2
GO:0008645	GO:0008645	hexose transmembrane transport	3/74	114/18723	0.0104164	0.0416478	0.0269711	TNF/FABP5/NR4A3	3
GO:1904892	GO:1904892	regulation of receptor signaling pathway via STAT	3/74	114/18723	0.0104164	0.0416478	0.0269711	IL4/TNF/IFNG	3
GO:0046916	GO:0046916	cellular transition metal ion homeostasis	3/74	115/18723	0.0106655	0.0425711	0.027569	MYC/PRNP/IFNG	3
GO:0006730	GO:0006730	one-carbon metabolic process	2/74	40/18723	0.0109088	0.0431374	0.0279358	MTHFD2/MAT2A	2
GO:0051281	GO:0051281	positive regulation of release of sequestered calcium ion into cytosol	2/74	40/18723	0.0109088	0.0431374	0.0279358	XCL1/IL13	2
GO:0150077	GO:0150077	regulation of neuroinflammatory response	2/74	40/18723	0.0109088	0.0431374	0.0279358	IL4/TNF	2
GO:1902686	GO:1902686	mitochondrial outer membrane permeabilization involved in programmed cell death	2/74	40/18723	0.0109088	0.0431374	0.0279358	BCL2L11/GZMB	2
GO:0007006	GO:0007006	mitochondrial membrane organization	3/74	116/18723	0.0109181	0.0431374	0.0279358	BCL2L11/GZMB/BCL2L1	3
GO:0015749	GO:0015749	monosaccharide transmembrane transport	3/74	116/18723	0.0109181	0.0431374	0.0279358	TNF/FABP5/NR4A3	3
GO:0048545	GO:0048545	response to steroid hormone	5/74	339/18723	0.010991	0.0433524	0.028075	BCL2L11/CFLAR/TNF/NR4A3/ZFP36L1	5
GO:0034764	GO:0034764	positive regulation of transmembrane transport	4/74	219/18723	0.0110733	0.0436033	0.0282375	XCL1/IL13/NR4A3/IFNG	4
GO:0072676	GO:0072676	lymphocyte migration	3/74	117/18723	0.0111741	0.0439263	0.0284467	XCL1/CCL1/CCL4	3
GO:0001667	GO:0001667	ameboidal-type cell migration	6/74	475/18723	0.0111937	0.0439295	0.0284487	IL4/TNF/RGCC/MAP2K3/SDC4/IFNG	6
GO:0097529	GO:0097529	myeloid leukocyte migration	4/74	220/18723	0.0112452	0.044058	0.028532	XCL1/IL4/CCL1/CCL4	4
GO:0034219	GO:0034219	carbohydrate transmembrane transport	3/74	118/18723	0.0114335	0.0443717	0.0287351	TNF/FABP5/NR4A3	3
GO:0051101	GO:0051101	regulation of DNA binding	3/74	118/18723	0.0114335	0.0443717	0.0287351	IRF4/NFKBIA/IFNG	3
GO:0002251	GO:0002251	organ or tissue specific immune response	2/74	41/18723	0.0114391	0.0443717	0.0287351	XCL1/IL4	2
GO:0032735	GO:0032735	positive regulation of interleukin-12 production	2/74	41/18723	0.0114391	0.0443717	0.0287351	CD40LG/IFNG	2
GO:0042307	GO:0042307	positive regulation of protein import into nucleus	2/74	41/18723	0.0114391	0.0443717	0.0287351	HSP90AB1/IFNG	2
GO:2000008	GO:2000008	regulation of protein localization to cell surface	2/74	41/18723	0.0114391	0.0443717	0.0287351	TNF/HSP90AB1	2
GO:0032496	GO:0032496	response to lipopolysaccharide	5/74	343/18723	0.011519	0.0446076	0.0288879	CSF2/IL13/LTA/TNF/NFKBIA	5
GO:0000302	GO:0000302	response to reactive oxygen species	4/74	222/18723	0.0115944	0.0448252	0.0290288	PLK3/PRDX1/NR4A3/KDM6B	4
GO:0050920	GO:0050920	regulation of chemotaxis	4/74	223/18723	0.0117716	0.0454351	0.0294238	XCL1/IL4/CCL1/CCL4	4
GO:0007520	GO:0007520	myoblast fusion	2/74	42/18723	0.0119806	0.0460143	0.0297989	CFLAR/IL4	2
GO:0010939	GO:0010939	regulation of necrotic cell death	2/74	42/18723	0.0119806	0.0460143	0.0297989	CFLAR/BIRC3	2
GO:1904037	GO:1904037	positive regulation of epithelial cell apoptotic process	2/74	42/18723	0.0119806	0.0460143	0.0297989	CD40LG/RGCC	2
GO:0050769	GO:0050769	positive regulation of neurogenesis	4/74	225/18723	0.0121311	0.0465158	0.0301236	ID2/LTA/TNF/IFNG	4
GO:0001704	GO:0001704	formation of primary germ layer	3/74	121/18723	0.0122328	0.0467524	0.0302768	DUSP2/DUSP4/KDM6B	3
GO:0043500	GO:0043500	muscle adaptation	3/74	121/18723	0.0122328	0.0467524	0.0302768	LMNA/CFLAR/NR4A3	3
GO:0051928	GO:0051928	positive regulation of calcium ion transport	3/74	122/18723	0.0125061	0.0470548	0.0304727	XCL1/IL13/CCL4	3
GO:1990266	GO:1990266	neutrophil migration	3/74	122/18723	0.0125061	0.0470548	0.0304727	XCL1/CCL1/CCL4	3
GO:0002861	GO:0002861	regulation of inflammatory response to antigenic stimulus	2/74	43/18723	0.0125332	0.0470548	0.0304727	LTA/TNF	2
GO:0006509	GO:0006509	membrane protein ectodomain proteolysis	2/74	43/18723	0.0125332	0.0470548	0.0304727	TNF/IFNG	2
GO:0014002	GO:0014002	astrocyte development	2/74	43/18723	0.0125332	0.0470548	0.0304727	TNF/IFNG	2
GO:0033173	GO:0033173	calcineurin-NFAT signaling cascade	2/74	43/18723	0.0125332	0.0470548	0.0304727	TNF/PRNP	2
GO:0034142	GO:0034142	toll-like receptor 4 signaling pathway	2/74	43/18723	0.0125332	0.0470548	0.0304727	NINJ1/NFKBIA	2
GO:0035794	GO:0035794	positive regulation of mitochondrial membrane permeability	2/74	43/18723	0.0125332	0.0470548	0.0304727	BCL2L11/GZMB	2
GO:0045981	GO:0045981	positive regulation of nucleotide metabolic process	2/74	43/18723	0.0125332	0.0470548	0.0304727	IL4/IFNG	2
GO:1900544	GO:1900544	positive regulation of purine nucleotide metabolic process	2/74	43/18723	0.0125332	0.0470548	0.0304727	IL4/IFNG	2
GO:1904591	GO:1904591	positive regulation of protein import	2/74	43/18723	0.0125332	0.0470548	0.0304727	HSP90AB1/IFNG	2
GO:0006887	GO:0006887	exocytosis	5/74	352/18723	0.0127699	0.0478667	0.0309985	IL13/IL4/NR4A3/SDC4/IFNG	5
GO:0051480	GO:0051480	regulation of cytosolic calcium ion concentration	5/74	353/18723	0.0129144	0.0483307	0.031299	XCL1/IL2/IL13/CCL1/PRNP	5
GO:0006775	GO:0006775	fat-soluble vitamin metabolic process	2/74	44/18723	0.0130968	0.0487791	0.0315894	TNF/IFNG	2
GO:0031295	GO:0031295	T cell costimulation	2/74	44/18723	0.0130968	0.0487791	0.0315894	CD40LG/TNFSF14	2
GO:0046427	GO:0046427	positive regulation of receptor signaling pathway via JAK-STAT	2/74	44/18723	0.0130968	0.0487791	0.0315894	IL4/TNF	2
GO:0045732	GO:0045732	positive regulation of protein catabolic process	4/74	231/18723	0.0132519	0.0492783	0.0319127	PLK3/TNF/RNF19A/IFNG	4
GO:0010631	GO:0010631	epithelial cell migration	5/74	357/18723	0.0135033	0.0501336	0.0324665	IL4/TNF/RGCC/MAP2K3/IFNG	5
GO:0002920	GO:0002920	regulation of humoral immune response	2/74	45/18723	0.0136712	0.0505964	0.0327662	LTA/TNF	2
GO:1902108	GO:1902108	regulation of mitochondrial membrane permeability involved in apoptotic process	2/74	45/18723	0.0136712	0.0505964	0.0327662	BCL2L11/GZMB	2
GO:0051052	GO:0051052	regulation of DNA metabolic process	5/74	359/18723	0.0138044	0.0510088	0.0330333	IL2/IL4/HSP90AB1/MYC/RGCC	5
GO:0090132	GO:0090132	epithelium migration	5/74	360/18723	0.0139567	0.0514902	0.033345	IL4/TNF/RGCC/MAP2K3/IFNG	5
GO:0045930	GO:0045930	negative regulation of mitotic cell cycle	4/74	235/18723	0.0140346	0.051696	0.0334783	PLK3/TNF/RGCC/ZFP36L1	4
GO:0035303	GO:0035303	regulation of dephosphorylation	3/74	128/18723	0.01422	0.0521842	0.0337945	TNF/HSP90AB1/IFNG	3
GO:0006984	GO:0006984	ER-nucleus signaling pathway	2/74	46/18723	0.0142564	0.0521842	0.0337945	BCL2L11/INSIG1	2
GO:0035094	GO:0035094	response to nicotine	2/74	46/18723	0.0142564	0.0521842	0.0337945	IL13/TNF	2
GO:0043300	GO:0043300	regulation of leukocyte degranulation	2/74	46/18723	0.0142564	0.0521842	0.0337945	IL13/IL4	2
GO:0002237	GO:0002237	response to molecule of bacterial origin	5/74	363/18723	0.0144204	0.0526796	0.0341153	CSF2/IL13/LTA/TNF/NFKBIA	5
GO:0031334	GO:0031334	positive regulation of protein-containing complex assembly	4/74	237/18723	0.0144368	0.0526796	0.0341153	BCL2L11/CSF2/TNF/IFNG	4
GO:0034101	GO:0034101	erythrocyte homeostasis	3/74	129/18723	0.014518	0.0528934	0.0342538	PRDX1/ID2/ZFP36L1	3
GO:0090130	GO:0090130	tissue migration	5/74	365/18723	0.0147352	0.0536012	0.0347121	IL4/TNF/RGCC/MAP2K3/IFNG	5
GO:0010712	GO:0010712	regulation of collagen metabolic process	2/74	47/18723	0.0148523	0.0536105	0.0347182	VSIR/RGCC	2
GO:0045581	GO:0045581	negative regulation of T cell differentiation	2/74	47/18723	0.0148523	0.0536105	0.0347182	IL2/IL4	2
GO:0045911	GO:0045911	positive regulation of DNA recombination	2/74	47/18723	0.0148523	0.0536105	0.0347182	IL2/IL4	2
GO:0048512	GO:0048512	circadian behavior	2/74	47/18723	0.0148523	0.0536105	0.0347182	ID2/CSF2	2
GO:0051972	GO:0051972	regulation of telomerase activity	2/74	47/18723	0.0148523	0.0536105	0.0347182	HSP90AB1/MYC	2
GO:1903844	GO:1903844	regulation of cellular response to transforming growth factor beta stimulus	3/74	131/18723	0.0151246	0.054509	0.0353	CFLAR/IL4/HSP90AB1	3
GO:0002673	GO:0002673	regulation of acute inflammatory response	2/74	48/18723	0.0154589	0.0552879	0.0358044	IL4/TNF	2
GO:0048146	GO:0048146	positive regulation of fibroblast proliferation	2/74	48/18723	0.0154589	0.0552879	0.0358044	IL13/MYC	2
GO:0097720	GO:0097720	calcineurin-mediated signaling	2/74	48/18723	0.0154589	0.0552879	0.0358044	TNF/PRNP	2
GO:1903053	GO:1903053	regulation of extracellular matrix organization	2/74	48/18723	0.0154589	0.0552879	0.0358044	CFLAR/RGCC	2
GO:1905710	GO:1905710	positive regulation of membrane permeability	2/74	48/18723	0.0154589	0.0552879	0.0358044	BCL2L11/GZMB	2
GO:0010565	GO:0010565	regulation of cellular ketone metabolic process	3/74	133/18723	0.0157453	0.0562264	0.0364122	INSIG1/FABP5/NR4A3	3
GO:0032434	GO:0032434	regulation of proteasomal ubiquitin-dependent protein catabolic process	3/74	134/18723	0.016061	0.0564587	0.0365627	PLK3/HSP90AB1/RNF19A	3
GO:0002762	GO:0002762	negative regulation of myeloid leukocyte differentiation	2/74	49/18723	0.0160759	0.0564587	0.0365627	IL4/MYC	2
GO:0007622	GO:0007622	rhythmic behavior	2/74	49/18723	0.0160759	0.0564587	0.0365627	ID2/CSF2	2
GO:0010823	GO:0010823	negative regulation of mitochondrion organization	2/74	49/18723	0.0160759	0.0564587	0.0365627	LMNA/BCL2L1	2
GO:0030857	GO:0030857	negative regulation of epithelial cell differentiation	2/74	49/18723	0.0160759	0.0564587	0.0365627	IL13/IFNG	2
GO:0042304	GO:0042304	regulation of fatty acid biosynthetic process	2/74	49/18723	0.0160759	0.0564587	0.0365627	INSIG1/FABP5	2
GO:0043330	GO:0043330	response to exogenous dsRNA	2/74	49/18723	0.0160759	0.0564587	0.0365627	DDX21/NFKBIA	2
GO:0043457	GO:0043457	regulation of cellular respiration	2/74	49/18723	0.0160759	0.0564587	0.0365627	IL4/IFNG	2
GO:1902041	GO:1902041	regulation of extrinsic apoptotic signaling pathway via death domain receptors	2/74	49/18723	0.0160759	0.0564587	0.0365627	CFLAR/BCL2L1	2
GO:1904707	GO:1904707	positive regulation of vascular associated smooth muscle cell proliferation	2/74	49/18723	0.0160759	0.0564587	0.0365627	TNF/NR4A3	2
GO:1904894	GO:1904894	positive regulation of receptor signaling pathway via STAT	2/74	49/18723	0.0160759	0.0564587	0.0365627	IL4/TNF	2
GO:0071216	GO:0071216	cellular response to biotic stimulus	4/74	246/18723	0.016337	0.0572898	0.0371009	BCL2L11/CSF2/TNF/NFKBIA	4
GO:0046638	GO:0046638	positive regulation of alpha-beta T cell differentiation	2/74	50/18723	0.0167034	0.0583994	0.0378194	NFKBID/IFNG	2
GO:0070231	GO:0070231	T cell apoptotic process	2/74	50/18723	0.0167034	0.0583994	0.0378194	BCL2L11/IL2RA	2
GO:0006986	GO:0006986	response to unfolded protein	3/74	137/18723	0.0170295	0.0594507	0.0385003	BCL2L11/HSP90AB1/HSPH1	3
GO:0051346	GO:0051346	negative regulation of hydrolase activity	5/74	379/18723	0.0170691	0.0595003	0.0385324	SERPINB9/TNF/BIRC3/PRNP/TNFSF14	5
GO:0014009	GO:0014009	glial cell proliferation	2/74	51/18723	0.0173412	0.0600648	0.038898	LTA/TNF	2
GO:0045661	GO:0045661	regulation of myoblast differentiation	2/74	51/18723	0.0173412	0.0600648	0.038898	TNF/ZFP36L1	2
GO:0071622	GO:0071622	regulation of granulocyte chemotaxis	2/74	51/18723	0.0173412	0.0600648	0.038898	XCL1/IL4	2
GO:1903307	GO:1903307	positive regulation of regulated secretory pathway	2/74	51/18723	0.0173412	0.0600648	0.038898	IL13/IL4	2
GO:0055076	GO:0055076	transition metal ion homeostasis	3/74	138/18723	0.0173595	0.0600648	0.038898	MYC/PRNP/IFNG	3
GO:0051496	GO:0051496	positive regulation of stress fiber assembly	2/74	52/18723	0.0179892	0.0621519	0.0402496	RGCC/SDC4	2
GO:0006839	GO:0006839	mitochondrial transport	4/74	254/18723	0.0181524	0.0626233	0.0405548	BCL2L11/GZMB/BCL2L1/TOMM40	4
GO:0043547	GO:0043547	positive regulation of GTPase activity	4/74	255/18723	0.0183879	0.0632488	0.04096	XCL1/RGS16/CCL1/CCL4	4
GO:0051924	GO:0051924	regulation of calcium ion transport	4/74	255/18723	0.0183879	0.0632488	0.04096	XCL1/IL13/PRNP/CCL4	4
GO:0002707	GO:0002707	negative regulation of lymphocyte mediated immunity	2/74	53/18723	0.0186474	0.0640476	0.0414772	XCL1/SERPINB9	2
GO:0097553	GO:0097553	calcium ion transmembrane import into cytosol	3/74	142/18723	0.0187151	0.0640916	0.0415057	XCL1/IL13/PRNP	3
GO:2000045	GO:2000045	regulation of G1/S transition of mitotic cell cycle	3/74	142/18723	0.0187151	0.0640916	0.0415057	PLK3/ID2/RGCC	3
GO:0070555	GO:0070555	response to interleukin-1	3/74	143/18723	0.0190629	0.0651875	0.0422154	XCL1/CCL1/CCL4	3
GO:0001706	GO:0001706	endoderm formation	2/74	54/18723	0.0193157	0.0657635	0.0425884	DUSP2/DUSP4	2
GO:0010524	GO:0010524	positive regulation of calcium ion transport into cytosol	2/74	54/18723	0.0193157	0.0657635	0.0425884	XCL1/IL13	2
GO:0014888	GO:0014888	striated muscle adaptation	2/74	54/18723	0.0193157	0.0657635	0.0425884	LMNA/CFLAR	2
GO:0001890	GO:0001890	placenta development	3/74	144/18723	0.0194144	0.0659075	0.0426817	CSF2/HSP90AB1/ZFP36L1	3
GO:0033135	GO:0033135	regulation of peptidyl-serine phosphorylation	3/74	144/18723	0.0194144	0.0659075	0.0426817	TNF/HSP90AB1/IFNG	3
GO:0000768	GO:0000768	syncytium formation by plasma membrane fusion	2/74	55/18723	0.019994	0.0674834	0.0437022	CFLAR/IL4	2
GO:0043331	GO:0043331	response to dsRNA	2/74	55/18723	0.019994	0.0674834	0.0437022	DDX21/NFKBIA	2
GO:0048016	GO:0048016	inositol phosphate-mediated signaling	2/74	55/18723	0.019994	0.0674834	0.0437022	TNF/PRNP	2
GO:0140253	GO:0140253	cell-cell fusion	2/74	55/18723	0.019994	0.0674834	0.0437022	CFLAR/IL4	2
GO:0002711	GO:0002711	positive regulation of T cell mediated immunity	2/74	56/18723	0.0206822	0.0694054	0.044947	XCL1/IL4	2
GO:0010332	GO:0010332	response to gamma radiation	2/74	56/18723	0.0206822	0.0694054	0.044947	MYC/BCL2L1	2
GO:0043388	GO:0043388	positive regulation of DNA binding	2/74	56/18723	0.0206822	0.0694054	0.044947	IRF4/IFNG	2
GO:0045599	GO:0045599	negative regulation of fat cell differentiation	2/74	56/18723	0.0206822	0.0694054	0.044947	TNF/INSIG1	2
GO:0030522	GO:0030522	intracellular receptor signaling pathway	4/74	265/18723	0.0208471	0.0697887	0.0451952	FABP5/NR4A3/BIRC3/NFKBIA	4
GO:0010212	GO:0010212	response to ionizing radiation	3/74	148/18723	0.0208561	0.0697887	0.0451952	NAMPT/MYC/BCL2L1	3
GO:0045834	GO:0045834	positive regulation of lipid metabolic process	3/74	149/18723	0.0212255	0.0709234	0.04593	TNF/NR4A3/IFNG	3
GO:0006949	GO:0006949	syncytium formation	2/74	57/18723	0.0213801	0.0711354	0.0460673	CFLAR/IL4	2
GO:0010883	GO:0010883	regulation of lipid storage	2/74	57/18723	0.0213801	0.0711354	0.0460673	TNF/NFKBIA	2
GO:0033619	GO:0033619	membrane protein proteolysis	2/74	57/18723	0.0213801	0.0711354	0.0460673	TNF/IFNG	2
GO:0050708	GO:0050708	regulation of protein secretion	4/74	268/18723	0.0216225	0.0718396	0.0465234	IL13/TNF/PIM3/IFNG	4
GO:0043535	GO:0043535	regulation of blood vessel endothelial cell migration	3/74	151/18723	0.021975	0.072804	0.0471479	TNF/RGCC/MAP2K3	3
GO:1904064	GO:1904064	positive regulation of cation transmembrane transport	3/74	151/18723	0.021975	0.072804	0.0471479	XCL1/IL13/IFNG	3
GO:0043666	GO:0043666	regulation of phosphoprotein phosphatase activity	2/74	58/18723	0.0220878	0.072971	0.047256	TNF/HSP90AB1	2
GO:0045604	GO:0045604	regulation of epidermal cell differentiation	2/74	58/18723	0.0220878	0.072971	0.047256	ZBED2/ZFP36L1	2
GO:0010959	GO:0010959	regulation of metal ion transport	5/74	406/18723	0.0222403	0.0733709	0.047515	XCL1/IL13/PRNP/IFNG/CCL4	5
GO:0008643	GO:0008643	carbohydrate transport	3/74	152/18723	0.0223552	0.0736463	0.0476934	TNF/FABP5/NR4A3	3
GO:0051962	GO:0051962	positive regulation of nervous system development	4/74	272/18723	0.0226837	0.0746234	0.0483261	ID2/LTA/TNF/IFNG	4
GO:0032768	GO:0032768	regulation of monooxygenase activity	2/74	59/18723	0.0228052	0.0747077	0.0483807	TNF/IFNG	2
GO:0035306	GO:0035306	positive regulation of dephosphorylation	2/74	59/18723	0.0228052	0.0747077	0.0483807	HSP90AB1/IFNG	2
GO:0051353	GO:0051353	positive regulation of oxidoreductase activity	2/74	59/18723	0.0228052	0.0747077	0.0483807	TNF/IFNG	2
GO:0034249	GO:0034249	negative regulation of cellular amide metabolic process	4/74	273/18723	0.0229539	0.0750898	0.0486282	NCL/GZMB/ZFP36L1/PRNP	4
GO:0043270	GO:0043270	positive regulation of ion transport	4/74	275/18723	0.0235002	0.0765529	0.0495756	XCL1/IL13/IFNG/CCL4	4
GO:0034614	GO:0034614	cellular response to reactive oxygen species	3/74	155/18723	0.0235174	0.0765529	0.0495756	PRDX1/NR4A3/KDM6B	3
GO:0002753	GO:0002753	cytoplasmic pattern recognition receptor signaling pathway	2/74	60/18723	0.0235321	0.0765529	0.0495756	BIRC3/NFKBIA	2
GO:0031663	GO:0031663	lipopolysaccharide-mediated signaling pathway	2/74	60/18723	0.0235321	0.0765529	0.0495756	TNF/NFKBIA	2
GO:0034113	GO:0034113	heterotypic cell-cell adhesion	2/74	61/18723	0.0242684	0.0785115	0.0508441	TNF/NINJ1	2
GO:0043030	GO:0043030	regulation of macrophage activation	2/74	61/18723	0.0242684	0.0785115	0.0508441	IL13/IL4	2
GO:0090342	GO:0090342	regulation of cell aging	2/74	61/18723	0.0242684	0.0785115	0.0508441	LMNA/NAMPT	2
GO:2000401	GO:2000401	regulation of lymphocyte migration	2/74	61/18723	0.0242684	0.0785115	0.0508441	XCL1/CCL4	2
GO:0032615	GO:0032615	interleukin-12 production	2/74	62/18723	0.0250142	0.0804789	0.0521181	CD40LG/IFNG	2
GO:0032655	GO:0032655	regulation of interleukin-12 production	2/74	62/18723	0.0250142	0.0804789	0.0521181	CD40LG/IFNG	2
GO:0032731	GO:0032731	positive regulation of interleukin-1 beta production	2/74	62/18723	0.0250142	0.0804789	0.0521181	TNF/IFNG	2
GO:0046824	GO:0046824	positive regulation of nucleocytoplasmic transport	2/74	62/18723	0.0250142	0.0804789	0.0521181	HSP90AB1/IFNG	2
GO:0035966	GO:0035966	response to topologically incorrect protein	3/74	159/18723	0.0251172	0.0805887	0.0521893	BCL2L11/HSP90AB1/HSPH1	3
GO:1903169	GO:1903169	regulation of calcium ion transmembrane transport	3/74	159/18723	0.0251172	0.0805887	0.0521893	XCL1/IL13/PRNP	3
GO:0060402	GO:0060402	calcium ion transport into cytosol	3/74	160/18723	0.0255262	0.0817886	0.0529663	XCL1/IL13/PRNP	3
GO:0051146	GO:0051146	striated muscle cell differentiation	4/74	283/18723	0.0257645	0.0820057	0.0531069	LMNA/CFLAR/IL4/KDM6B	4
GO:0002704	GO:0002704	negative regulation of leukocyte mediated immunity	2/74	63/18723	0.0257692	0.0820057	0.0531069	XCL1/SERPINB9	2
GO:0031343	GO:0031343	positive regulation of cell killing	2/74	63/18723	0.0257692	0.0820057	0.0531069	XCL1/IFNG	2
GO:0032233	GO:0032233	positive regulation of actin filament bundle assembly	2/74	63/18723	0.0257692	0.0820057	0.0531069	RGCC/SDC4	2
GO:0070059	GO:0070059	intrinsic apoptotic signaling pathway in response to endoplasmic reticulum stress	2/74	63/18723	0.0257692	0.0820057	0.0531069	BCL2L11/BCL2L1	2
GO:0048608	GO:0048608	reproductive structure development	5/74	424/18723	0.0262012	0.0832671	0.0539238	BCL2L11/CSF2/HSP90AB1/ZFP36L1/BCL2L1	5
GO:0030858	GO:0030858	positive regulation of epithelial cell differentiation	2/74	64/18723	0.0265335	0.0842086	0.0545335	ZBED2/IL13	2
GO:0061458	GO:0061458	reproductive system development	5/74	427/18723	0.0269026	0.0852645	0.0552173	BCL2L11/CSF2/HSP90AB1/ZFP36L1/BCL2L1	5
GO:2000058	GO:2000058	regulation of ubiquitin-dependent protein catabolic process	3/74	164/18723	0.0271979	0.0860792	0.0557449	PLK3/HSP90AB1/RNF19A	3
GO:0097193	GO:0097193	intrinsic apoptotic signaling pathway	4/74	288/18723	0.0272443	0.0860792	0.0557449	BCL2L11/TNF/BCL2A1/BCL2L1	4
GO:0032507	GO:0032507	maintenance of protein location in cell	2/74	65/18723	0.0273069	0.0860792	0.0557449	INSIG1/SRGN	2
GO:0045682	GO:0045682	regulation of epidermis development	2/74	65/18723	0.0273069	0.0860792	0.0557449	ZBED2/ZFP36L1	2
GO:0050796	GO:0050796	regulation of insulin secretion	3/74	165/18723	0.0276248	0.0869642	0.056318	TNF/PIM3/IFNG	3
GO:0071375	GO:0071375	cellular response to peptide hormone stimulus	4/74	290/18723	0.0278503	0.0875563	0.0567015	CFLAR/INSIG1/NR4A3/ZFP36L1	4
GO:0045600	GO:0045600	positive regulation of fat cell differentiation	2/74	66/18723	0.0280893	0.087953	0.0569584	ID2/ZFP36L1	2
GO:0050766	GO:0050766	positive regulation of phagocytosis	2/74	66/18723	0.0280893	0.087953	0.0569584	TNF/IFNG	2
GO:1905953	GO:1905953	negative regulation of lipid localization	2/74	66/18723	0.0280893	0.087953	0.0569584	TNF/NFKBIA	2
GO:0060485	GO:0060485	mesenchyme development	4/74	291/18723	0.0281563	0.088045	0.057018	MYC/NOLC1/RGCC/ZFP36L1	4
GO:0034767	GO:0034767	positive regulation of ion transmembrane transport	3/74	167/18723	0.0284893	0.0889674	0.0576153	XCL1/IL13/IFNG	3
GO:0001822	GO:0001822	kidney development	4/74	293/18723	0.0287744	0.0897377	0.0581142	BCL2L11/CFLAR/MYC/SDC4	4
GO:0006879	GO:0006879	cellular iron ion homeostasis	2/74	67/18723	0.0288807	0.0899494	0.0582513	MYC/IFNG	2
GO:1902806	GO:1902806	regulation of cell cycle G1/S phase transition	3/74	168/18723	0.028927	0.0899737	0.058267	PLK3/ID2/RGCC	3
GO:0032922	GO:0032922	circadian regulation of gene expression	2/74	68/18723	0.029681	0.0920742	0.0596273	ID2/NAMPT	2
GO:0034394	GO:0034394	protein localization to cell surface	2/74	68/18723	0.029681	0.0920742	0.0596273	TNF/HSP90AB1	2
GO:0099177	GO:0099177	regulation of trans-synaptic signaling	5/74	440/18723	0.0300809	0.0931912	0.0603506	TNF/FABP5/RNF19A/SRGN/PRNP	5
GO:0045936	GO:0045936	negative regulation of phosphate metabolic process	5/74	441/18723	0.0303349	0.0936676	0.0606592	IL2/TNF/PRNP/GADD45B/IFNG	5
GO:0010720	GO:0010720	positive regulation of cell development	4/74	298/18723	0.0303549	0.0936676	0.0606592	ID2/LTA/TNF/IFNG	4
GO:0048511	GO:0048511	rhythmic process	4/74	298/18723	0.0303549	0.0936676	0.0606592	ID2/CSF2/NAMPT/CREM	4
GO:0010611	GO:0010611	regulation of cardiac muscle hypertrophy	2/74	69/18723	0.0304902	0.0938375	0.0607692	LMNA/NR4A3	2
GO:1901224	GO:1901224	positive regulation of NIK/NF-kappaB signaling	2/74	69/18723	0.0304902	0.0938375	0.0607692	TNF/TNFSF14	2
GO:0010563	GO:0010563	negative regulation of phosphorus metabolic process	5/74	442/18723	0.0305901	0.0940215	0.0608883	IL2/TNF/PRNP/GADD45B/IFNG	5
GO:1901990	GO:1901990	regulation of mitotic cell cycle phase transition	4/74	299/18723	0.0306771	0.0941649	0.0609812	PLK3/ID2/RGCC/ZFP36L1	4
GO:0006694	GO:0006694	steroid biosynthetic process	3/74	173/18723	0.0311688	0.095424	0.0617966	TNF/INSIG1/IFNG	3
GO:0051099	GO:0051099	positive regulation of binding	3/74	173/18723	0.0311688	0.095424	0.0617966	IRF4/HSP90AB1/IFNG	3
GO:0042063	GO:0042063	gliogenesis	4/74	301/18723	0.0313275	0.0957843	0.0620299	ID2/LTA/TNF/IFNG	4
GO:0006979	GO:0006979	response to oxidative stress	5/74	446/18723	0.0316248	0.0965356	0.0625165	PLK3/PRDX1/NR4A3/KDM6B/PRNP	5
GO:0072001	GO:0072001	renal system development	4/74	302/18723	0.0316557	0.0965356	0.0625165	BCL2L11/CFLAR/MYC/SDC4	4
GO:0032722	GO:0032722	positive regulation of chemokine production	2/74	71/18723	0.0321345	0.0975353	0.0631639	TNF/IFNG	2
GO:0050795	GO:0050795	regulation of behavior	2/74	71/18723	0.0321345	0.0975353	0.0631639	CSF2/NR4A3	2
GO:0071230	GO:0071230	cellular response to amino acid stimulus	2/74	71/18723	0.0321345	0.0975353	0.0631639	TNF/BCL2L1	2
GO:0006874	GO:0006874	cellular calcium ion homeostasis	5/74	448/18723	0.0321504	0.0975353	0.0631639	XCL1/IL2/IL13/CCL1/PRNP	5
GO:0043534	GO:0043534	blood vessel endothelial cell migration	3/74	176/18723	0.0325567	0.0986402	0.0638794	TNF/RGCC/MAP2K3	3
GO:0014743	GO:0014743	regulation of muscle hypertrophy	2/74	72/18723	0.0329696	0.0992917	0.0643013	LMNA/NR4A3	2
GO:0042246	GO:0042246	tissue regeneration	2/74	72/18723	0.0329696	0.0992917	0.0643013	CFLAR/NINJ1	2
GO:0071479	GO:0071479	cellular response to ionizing radiation	2/74	72/18723	0.0329696	0.0992917	0.0643013	NAMPT/BCL2L1	2
GO:0009914	GO:0009914	hormone transport	4/74	306/18723	0.0329891	0.0992917	0.0643013	TNF/SLC7A5/PIM3/IFNG	4
GO:0051302	GO:0051302	regulation of cell division	3/74	177/18723	0.0330265	0.0992917	0.0643013	PLK3/MYC/BCL2L1	3
GO:0098739	GO:0098739	import across plasma membrane	3/74	177/18723	0.0330265	0.0992917	0.0643013	SLC7A5/PRNP/IFNG	3
GO:0032732	GO:0032732	positive regulation of interleukin-1 production	2/74	73/18723	0.0338131	0.101396	0.0656641	TNF/IFNG	2
GO:1904427	GO:1904427	positive regulation of calcium ion transmembrane transport	2/74	73/18723	0.0338131	0.101396	0.0656641	XCL1/IL13	2
GO:1901991	GO:1901991	negative regulation of mitotic cell cycle phase transition	3/74	179/18723	0.0339766	0.101756	0.0658971	PLK3/RGCC/ZFP36L1	3
GO:0009314	GO:0009314	response to radiation	5/74	456/18723	0.0343075	0.102615	0.0664537	PLK3/ID2/NAMPT/MYC/BCL2L1	5
GO:0043409	GO:0043409	negative regulation of MAPK cascade	3/74	180/18723	0.034457	0.1028	0.0665731	DUSP2/DUSP4/MYC	3
GO:0071897	GO:0071897	DNA biosynthetic process	3/74	180/18723	0.034457	0.1028	0.0665731	HSP90AB1/MYC/RGCC	3
GO:0010822	GO:0010822	positive regulation of mitochondrion organization	2/74	74/18723	0.0346651	0.103289	0.0668899	BCL2L11/GZMB	2
GO:0030323	GO:0030323	respiratory tube development	3/74	181/18723	0.0349409	0.103714	0.0671653	IL13/TNF/TRAF4	3
GO:0032640	GO:0032640	tumor necrosis factor production	3/74	181/18723	0.0349409	0.103714	0.0671653	IL4/VSIR/IFNG	3
GO:0032680	GO:0032680	regulation of tumor necrosis factor production	3/74	181/18723	0.0349409	0.103714	0.0671653	IL4/VSIR/IFNG	3
GO:0055074	GO:0055074	calcium ion homeostasis	5/74	460/18723	0.0354192	0.104895	0.0679299	XCL1/IL2/IL13/CCL1/PRNP	5
GO:0060401	GO:0060401	cytosolic calcium ion transport	3/74	182/18723	0.0354284	0.104895	0.0679299	XCL1/IL13/PRNP	3
GO:0001937	GO:0001937	negative regulation of endothelial cell proliferation	2/74	76/18723	0.036394	0.107482	0.0696052	TNF/RGCC	2
GO:0032720	GO:0032720	negative regulation of tumor necrosis factor production	2/74	76/18723	0.036394	0.107482	0.0696052	IL4/VSIR	2
GO:0006959	GO:0006959	humoral immune response	4/74	317/18723	0.0368245	0.108616	0.0703397	LTA/TNF/RGCC/IFNG	4
GO:0015980	GO:0015980	energy derivation by oxidation of organic compounds	4/74	318/18723	0.0371854	0.109542	0.0709397	IL4/MYC/NR4A3/IFNG	4
GO:0071478	GO:0071478	cellular response to radiation	3/74	186/18723	0.0374134	0.109662	0.0710169	NAMPT/MYC/BCL2L1	3
GO:0071706	GO:0071706	tumor necrosis factor superfamily cytokine production	3/74	186/18723	0.0374134	0.109662	0.0710169	IL4/VSIR/IFNG	3
GO:1902115	GO:1902115	regulation of organelle assembly	3/74	186/18723	0.0374134	0.109662	0.0710169	CSF2/TNF/SDC4	3
GO:1903555	GO:1903555	regulation of tumor necrosis factor superfamily cytokine production	3/74	186/18723	0.0374134	0.109662	0.0710169	IL4/VSIR/IFNG	3
GO:0008202	GO:0008202	steroid metabolic process	4/74	319/18723	0.0375484	0.10992	0.071184	IL4/TNF/INSIG1/IFNG	4
GO:0006417	GO:0006417	regulation of translation	5/74	468/18723	0.0377093	0.109976	0.0712204	NCL/TNF/NOLC1/GZMB/ZFP36L1	5
GO:0061136	GO:0061136	regulation of proteasomal protein catabolic process	3/74	187/18723	0.0379185	0.109976	0.0712204	PLK3/HSP90AB1/RNF19A	3
GO:0006919	GO:0006919	activation of cysteine-type endopeptidase activity involved in apoptotic process	2/74	78/18723	0.0381556	0.109976	0.0712204	CFLAR/TNF	2
GO:0043537	GO:0043537	negative regulation of blood vessel endothelial cell migration	2/74	78/18723	0.0381556	0.109976	0.0712204	TNF/RGCC	2
GO:1903556	GO:1903556	negative regulation of tumor necrosis factor superfamily cytokine production	2/74	78/18723	0.0381556	0.109976	0.0712204	IL4/VSIR	2
GO:0003330	GO:0003330	regulation of extracellular matrix constituent secretion	1/74	10/18723	0.0388372	0.109976	0.0712204	RGCC	1
GO:0019062	GO:0019062	virion attachment to host cell	1/74	10/18723	0.0388372	0.109976	0.0712204	HSP90AB1	1
GO:0030388	GO:0030388	fructose 1,6-bisphosphate metabolic process	1/74	10/18723	0.0388372	0.109976	0.0712204	IFNG	1
GO:0034356	GO:0034356	NAD biosynthesis via nicotinamide riboside salvage pathway	1/74	10/18723	0.0388372	0.109976	0.0712204	NAMPT	1
GO:0034756	GO:0034756	regulation of iron ion transport	1/74	10/18723	0.0388372	0.109976	0.0712204	IFNG	1
GO:0035999	GO:0035999	tetrahydrofolate interconversion	1/74	10/18723	0.0388372	0.109976	0.0712204	MTHFD2	1
GO:0036363	GO:0036363	transforming growth factor beta activation	1/74	10/18723	0.0388372	0.109976	0.0712204	HSP90AB1	1
GO:0042045	GO:0042045	epithelial fluid transport	1/74	10/18723	0.0388372	0.109976	0.0712204	CSF2	1
GO:0061140	GO:0061140	lung secretory cell differentiation	1/74	10/18723	0.0388372	0.109976	0.0712204	IL13	1
GO:0061179	GO:0061179	negative regulation of insulin secretion involved in cellular response to glucose stimulus	1/74	10/18723	0.0388372	0.109976	0.0712204	PIM3	1
GO:0070862	GO:0070862	negative regulation of protein exit from endoplasmic reticulum	1/74	10/18723	0.0388372	0.109976	0.0712204	INSIG1	1
GO:0072124	GO:0072124	regulation of glomerular mesangial cell proliferation	1/74	10/18723	0.0388372	0.109976	0.0712204	CFLAR	1
GO:0072203	GO:0072203	cell proliferation involved in metanephros development	1/74	10/18723	0.0388372	0.109976	0.0712204	MYC	1
GO:0090647	GO:0090647	modulation of age-related behavioral decline	1/74	10/18723	0.0388372	0.109976	0.0712204	PRNP	1
GO:0098917	GO:0098917	retrograde trans-synaptic signaling	1/74	10/18723	0.0388372	0.109976	0.0712204	FABP5	1
GO:1901203	GO:1901203	positive regulation of extracellular matrix assembly	1/74	10/18723	0.0388372	0.109976	0.0712204	RGCC	1
GO:1901838	GO:1901838	positive regulation of transcription of nucleolar large rRNA by RNA polymerase I	1/74	10/18723	0.0388372	0.109976	0.0712204	NCL	1
GO:1902237	GO:1902237	positive regulation of endoplasmic reticulum stress-induced intrinsic apoptotic signaling pathway	1/74	10/18723	0.0388372	0.109976	0.0712204	BCL2L11	1
GO:1990535	GO:1990535	neuron projection maintenance	1/74	10/18723	0.0388372	0.109976	0.0712204	PRNP	1
GO:2000048	GO:2000048	negative regulation of cell-cell adhesion mediated by cadherin	1/74	10/18723	0.0388372	0.109976	0.0712204	RGCC	1
GO:2000253	GO:2000253	positive regulation of feeding behavior	1/74	10/18723	0.0388372	0.109976	0.0712204	NR4A3	1
GO:2001225	GO:2001225	regulation of chloride transport	1/74	10/18723	0.0388372	0.109976	0.0712204	PRNP	1
GO:0051279	GO:0051279	regulation of release of sequestered calcium ion into cytosol	2/74	79/18723	0.0390485	0.110441	0.0715215	XCL1/IL13	2
GO:0008544	GO:0008544	epidermis development	4/74	324/18723	0.0393943	0.111284	0.0720676	ZBED2/TNF/FABP5/ZFP36L1	4
GO:0071229	GO:0071229	cellular response to acid chemical	2/74	80/18723	0.0399494	0.112716	0.0729949	TNF/BCL2L1	2
GO:0002831	GO:0002831	regulation of response to biotic stimulus	4/74	327/18723	0.0405264	0.114206	0.0739601	IL4/SERPINB9/HSP90AB1/BIRC3	4
GO:0071260	GO:0071260	cellular response to mechanical stimulus	2/74	81/18723	0.0408581	0.115003	0.0744757	IL13/TNFSF14	2
GO:0001892	GO:0001892	embryonic placenta development	2/74	82/18723	0.0417746	0.116236	0.0752744	CSF2/ZFP36L1	2
GO:0001910	GO:0001910	regulation of leukocyte mediated cytotoxicity	2/74	82/18723	0.0417746	0.116236	0.0752744	XCL1/SERPINB9	2
GO:0046889	GO:0046889	positive regulation of lipid biosynthetic process	2/74	82/18723	0.0417746	0.116236	0.0752744	TNF/IFNG	2
GO:1905897	GO:1905897	regulation of response to endoplasmic reticulum stress	2/74	82/18723	0.0417746	0.116236	0.0752744	BCL2L11/BCL2L1	2
GO:0030073	GO:0030073	insulin secretion	3/74	195/18723	0.0420846	0.116236	0.0752744	TNF/PIM3/IFNG	3
GO:0031032	GO:0031032	actomyosin structure organization	3/74	196/18723	0.042621	0.116236	0.0752744	CFLAR/RGCC/SDC4	3
GO:0090276	GO:0090276	regulation of peptide hormone secretion	3/74	196/18723	0.042621	0.116236	0.0752744	TNF/PIM3/IFNG	3
GO:0001660	GO:0001660	fever generation	1/74	11/18723	0.042638	0.116236	0.0752744	TNF	1
GO:0002725	GO:0002725	negative regulation of T cell cytokine production	1/74	11/18723	0.042638	0.116236	0.0752744	XCL1	1
GO:0002732	GO:0002732	positive regulation of dendritic cell cytokine production	1/74	11/18723	0.042638	0.116236	0.0752744	DDX21	1
GO:0019048	GO:0019048	modulation by virus of host process	1/74	11/18723	0.042638	0.116236	0.0752744	BCL2L1	1
GO:0031652	GO:0031652	positive regulation of heat generation	1/74	11/18723	0.042638	0.116236	0.0752744	TNF	1
GO:0033860	GO:0033860	regulation of NAD(P)H oxidase activity	1/74	11/18723	0.042638	0.116236	0.0752744	IL13	1
GO:0045657	GO:0045657	positive regulation of monocyte differentiation	1/74	11/18723	0.042638	0.116236	0.0752744	ZFP36L1	1
GO:0045793	GO:0045793	positive regulation of cell size	1/74	11/18723	0.042638	0.116236	0.0752744	HSP90AB1	1
GO:0051132	GO:0051132	NK T cell activation	1/74	11/18723	0.042638	0.116236	0.0752744	HSPH1	1
GO:0051574	GO:0051574	positive regulation of histone H3-K9 methylation	1/74	11/18723	0.042638	0.116236	0.0752744	LMNA	1
GO:0051798	GO:0051798	positive regulation of hair follicle development	1/74	11/18723	0.042638	0.116236	0.0752744	TNF	1
GO:0055015	GO:0055015	ventricular cardiac muscle cell development	1/74	11/18723	0.042638	0.116236	0.0752744	LMNA	1
GO:0060433	GO:0060433	bronchus development	1/74	11/18723	0.042638	0.116236	0.0752744	IL13	1
GO:0070327	GO:0070327	thyroid hormone transport	1/74	11/18723	0.042638	0.116236	0.0752744	SLC7A5	1
GO:0070417	GO:0070417	cellular response to cold	1/74	11/18723	0.042638	0.116236	0.0752744	NFKBIA	1
GO:0072110	GO:0072110	glomerular mesangial cell proliferation	1/74	11/18723	0.042638	0.116236	0.0752744	CFLAR	1
GO:0090649	GO:0090649	response to oxygen-glucose deprivation	1/74	11/18723	0.042638	0.116236	0.0752744	NAMPT	1
GO:1900112	GO:1900112	regulation of histone H3-K9 trimethylation	1/74	11/18723	0.042638	0.116236	0.0752744	LMNA	1
GO:1901030	GO:1901030	positive regulation of mitochondrial outer membrane permeabilization involved in apoptotic signaling pathway	1/74	11/18723	0.042638	0.116236	0.0752744	GZMB	1
GO:2000343	GO:2000343	positive regulation of chemokine (C-X-C motif) ligand 2 production	1/74	11/18723	0.042638	0.116236	0.0752744	TNF	1
GO:0072503	GO:0072503	cellular divalent inorganic cation homeostasis	5/74	486/18723	0.0431906	0.117605	0.0761611	XCL1/IL2/IL13/CCL1/PRNP	5
GO:0010660	GO:0010660	regulation of muscle cell apoptotic process	2/74	84/18723	0.0436308	0.11839	0.0766696	CFLAR/IFNG	2
GO:0045445	GO:0045445	myoblast differentiation	2/74	84/18723	0.0436308	0.11839	0.0766696	TNF/ZFP36L1	2
GO:1900542	GO:1900542	regulation of purine nucleotide metabolic process	2/74	84/18723	0.0436308	0.11839	0.0766696	IL4/IFNG	2
GO:0031099	GO:0031099	regeneration	3/74	198/18723	0.0437041	0.118452	0.0767094	CFLAR/NINJ1/NR4A3	3
GO:0062197	GO:0062197	cellular response to chemical stress	4/74	337/18723	0.0444339	0.120242	0.0778689	PRDX1/NR4A3/ZFP36L1/KDM6B	4
GO:0002709	GO:0002709	regulation of T cell mediated immunity	2/74	85/18723	0.0445703	0.120242	0.0778689	XCL1/IL4	2
GO:0055072	GO:0055072	iron ion homeostasis	2/74	85/18723	0.0445703	0.120242	0.0778689	MYC/IFNG	2
GO:0097194	GO:0097194	execution phase of apoptosis	2/74	85/18723	0.0445703	0.120242	0.0778689	CFLAR/BCL2L1	2
GO:0002791	GO:0002791	regulation of peptide secretion	3/74	200/18723	0.044801	0.120681	0.0781528	TNF/PIM3/IFNG	3
GO:0001655	GO:0001655	urogenital system development	4/74	338/18723	0.044836	0.120681	0.0781528	BCL2L11/CFLAR/MYC/SDC4	4
GO:0006140	GO:0006140	regulation of nucleotide metabolic process	2/74	86/18723	0.0455174	0.122133	0.0790931	IL4/IFNG	2
GO:0019722	GO:0019722	calcium-mediated signaling	3/74	202/18723	0.0459116	0.122133	0.0790931	TNF/PRNP/CCL4	3
GO:0090087	GO:0090087	regulation of peptide transport	3/74	202/18723	0.0459116	0.122133	0.0790931	TNF/PIM3/IFNG	3
GO:0001821	GO:0001821	histamine secretion	1/74	12/18723	0.0464241	0.122133	0.0790931	CSF2	1
GO:0002664	GO:0002664	regulation of T cell tolerance induction	1/74	12/18723	0.0464241	0.122133	0.0790931	IL2RA	1
GO:0002674	GO:0002674	negative regulation of acute inflammatory response	1/74	12/18723	0.0464241	0.122133	0.0790931	IL4	1
GO:0002903	GO:0002903	negative regulation of B cell apoptotic process	1/74	12/18723	0.0464241	0.122133	0.0790931	IL2	1
GO:0009886	GO:0009886	post-embryonic animal morphogenesis	1/74	12/18723	0.0464241	0.122133	0.0790931	BCL2L11	1
GO:0014889	GO:0014889	muscle atrophy	1/74	12/18723	0.0464241	0.122133	0.0790931	CFLAR	1
GO:0034145	GO:0034145	positive regulation of toll-like receptor 4 signaling pathway	1/74	12/18723	0.0464241	0.122133	0.0790931	NINJ1	1
GO:0044650	GO:0044650	adhesion of symbiont to host cell	1/74	12/18723	0.0464241	0.122133	0.0790931	HSP90AB1	1
GO:0071472	GO:0071472	cellular response to salt stress	1/74	12/18723	0.0464241	0.122133	0.0790931	ZFP36L1	1
GO:0072537	GO:0072537	fibroblast activation	1/74	12/18723	0.0464241	0.122133	0.0790931	RGCC	1
GO:1902950	GO:1902950	regulation of dendritic spine maintenance	1/74	12/18723	0.0464241	0.122133	0.0790931	PRNP	1
GO:0001933	GO:0001933	negative regulation of protein phosphorylation	4/74	342/18723	0.0464648	0.122133	0.0790931	IL2/PRNP/GADD45B/IFNG	4
GO:0019915	GO:0019915	lipid storage	2/74	87/18723	0.0464718	0.122133	0.0790931	TNF/NFKBIA	2
GO:0150104	GO:0150104	transport across blood-brain barrier	2/74	87/18723	0.0464718	0.122133	0.0790931	FABP5/SLC7A5	2
GO:1900182	GO:1900182	positive regulation of protein localization to nucleus	2/74	87/18723	0.0464718	0.122133	0.0790931	HSP90AB1/IFNG	2
GO:1903578	GO:1903578	regulation of ATP metabolic process	2/74	87/18723	0.0464718	0.122133	0.0790931	IL4/IFNG	2
GO:0032869	GO:0032869	cellular response to insulin stimulus	3/74	203/18723	0.046472	0.122133	0.0790931	CFLAR/INSIG1/ZFP36L1	3
GO:0051701	GO:0051701	biological process involved in interaction with host	3/74	203/18723	0.046472	0.122133	0.0790931	TNFRSF4/SERPINB9/BCL2L1	3
GO:0010232	GO:0010232	vascular transport	2/74	88/18723	0.0474336	0.12438	0.0805488	FABP5/SLC7A5	2
GO:0030101	GO:0030101	natural killer cell activation	2/74	88/18723	0.0474336	0.12438	0.0805488	PRDX1/IL2	2
GO:0010657	GO:0010657	muscle cell apoptotic process	2/74	89/18723	0.0484028	0.126779	0.0821024	CFLAR/IFNG	2
GO:0050679	GO:0050679	positive regulation of epithelial cell proliferation	3/74	207/18723	0.0487477	0.12754	0.082595	CFLAR/MYC/NR4A3	3
GO:0043087	GO:0043087	regulation of GTPase activity	4/74	348/18723	0.0489697	0.127894	0.0828244	XCL1/RGS16/CCL1/CCL4	4
GO:0032436	GO:0032436	positive regulation of proteasomal ubiquitin-dependent protein catabolic process	2/74	90/18723	0.0493791	0.127894	0.0828244	PLK3/RNF19A	2
GO:0035304	GO:0035304	regulation of protein dephosphorylation	2/74	90/18723	0.0493791	0.127894	0.0828244	TNF/HSP90AB1	2
GO:0099175	GO:0099175	regulation of postsynapse organization	2/74	90/18723	0.0493791	0.127894	0.0828244	SRGN/PRNP	2
GO:1904705	GO:1904705	regulation of vascular associated smooth muscle cell proliferation	2/74	90/18723	0.0493791	0.127894	0.0828244	TNF/NR4A3	2
GO:0071222	GO:0071222	cellular response to lipopolysaccharide	3/74	209/18723	0.0499059	0.127894	0.0828244	CSF2/TNF/NFKBIA	3
GO:0006983	GO:0006983	ER overload response	1/74	13/18723	0.0501954	0.127894	0.0828244	BCL2L11	1
GO:0008298	GO:0008298	intracellular mRNA localization	1/74	13/18723	0.0501954	0.127894	0.0828244	ZFP36L1	1
GO:0010745	GO:0010745	negative regulation of macrophage derived foam cell differentiation	1/74	13/18723	0.0501954	0.127894	0.0828244	NFKBIA	1
GO:0014029	GO:0014029	neural crest formation	1/74	13/18723	0.0501954	0.127894	0.0828244	NOLC1	1
GO:0014745	GO:0014745	negative regulation of muscle adaptation	1/74	13/18723	0.0501954	0.127894	0.0828244	LMNA	1
GO:0014842	GO:0014842	regulation of skeletal muscle satellite cell proliferation	1/74	13/18723	0.0501954	0.127894	0.0828244	CFLAR	1
GO:0015801	GO:0015801	aromatic amino acid transport	1/74	13/18723	0.0501954	0.127894	0.0828244	SLC7A5	1
GO:0031392	GO:0031392	regulation of prostaglandin biosynthetic process	1/74	13/18723	0.0501954	0.127894	0.0828244	FABP5	1
GO:0035331	GO:0035331	negative regulation of hippo signaling	1/74	13/18723	0.0501954	0.127894	0.0828244	MAP2K3	1
GO:0048070	GO:0048070	regulation of developmental pigmentation	1/74	13/18723	0.0501954	0.127894	0.0828244	BCL2L11	1
GO:0048711	GO:0048711	positive regulation of astrocyte differentiation	1/74	13/18723	0.0501954	0.127894	0.0828244	ID2	1
GO:0061469	GO:0061469	regulation of type B pancreatic cell proliferation	1/74	13/18723	0.0501954	0.127894	0.0828244	NR4A3	1
GO:0070424	GO:0070424	regulation of nucleotide-binding oligomerization domain containing signaling pathway	1/74	13/18723	0.0501954	0.127894	0.0828244	BIRC3	1
GO:0070486	GO:0070486	leukocyte aggregation	1/74	13/18723	0.0501954	0.127894	0.0828244	NR4A3	1
GO:0120305	GO:0120305	regulation of pigmentation	1/74	13/18723	0.0501954	0.127894	0.0828244	BCL2L11	1
GO:1900103	GO:1900103	positive regulation of endoplasmic reticulum unfolded protein response	1/74	13/18723	0.0501954	0.127894	0.0828244	BCL2L11	1
GO:1900272	GO:1900272	negative regulation of long-term synaptic potentiation	1/74	13/18723	0.0501954	0.127894	0.0828244	PRNP	1
GO:2000318	GO:2000318	positive regulation of T-helper 17 type immune response	1/74	13/18723	0.0501954	0.127894	0.0828244	NFKBID	1
GO:0001657	GO:0001657	ureteric bud development	2/74	91/18723	0.0503626	0.127902	0.0828297	MYC/SDC4	2
GO:0051492	GO:0051492	regulation of stress fiber assembly	2/74	91/18723	0.0503626	0.127902	0.0828297	RGCC/SDC4	2
GO:1990874	GO:1990874	vascular associated smooth muscle cell proliferation	2/74	91/18723	0.0503626	0.127902	0.0828297	TNF/NR4A3	2
GO:0007623	GO:0007623	circadian rhythm	3/74	210/18723	0.05049	0.128087	0.0829491	ID2/CSF2/NAMPT	3
GO:0042180	GO:0042180	cellular ketone metabolic process	3/74	211/18723	0.0510775	0.129297	0.0837326	INSIG1/FABP5/NR4A3	3
GO:0050807	GO:0050807	regulation of synapse organization	3/74	211/18723	0.0510775	0.129297	0.0837326	TNF/SRGN/PRNP	3
GO:0032465	GO:0032465	regulation of cytokinesis	2/74	92/18723	0.0513532	0.129574	0.0839122	PLK3/BCL2L1	2
GO:0072163	GO:0072163	mesonephric epithelium development	2/74	92/18723	0.0513532	0.129574	0.0839122	MYC/SDC4	2
GO:0072164	GO:0072164	mesonephric tubule development	2/74	92/18723	0.0513532	0.129574	0.0839122	MYC/SDC4	2
GO:0043583	GO:0043583	ear development	3/74	213/18723	0.0522624	0.131726	0.0853059	BCL2L11/INSIG1/SDC4	3
GO:0032755	GO:0032755	positive regulation of interleukin-6 production	2/74	93/18723	0.0523508	0.131807	0.0853581	TNF/IFNG	2
GO:0000082	GO:0000082	G1/S transition of mitotic cell cycle	3/74	214/18723	0.0528599	0.132816	0.0860118	PLK3/ID2/RGCC	3
GO:1904062	GO:1904062	regulation of cation transmembrane transport	4/74	357/18723	0.0528653	0.132816	0.0860118	XCL1/IL13/PRNP/IFNG	4
GO:1990830	GO:1990830	cellular response to leukemia inhibitory factor	2/74	94/18723	0.0533554	0.132835	0.0860243	MAT2A/NCL	2
GO:0009306	GO:0009306	protein secretion	4/74	359/18723	0.0537535	0.132835	0.0860243	IL13/TNF/PIM3/IFNG	4
GO:0071900	GO:0071900	regulation of protein serine/threonine kinase activity	4/74	359/18723	0.0537535	0.132835	0.0860243	TNF/HSP90AB1/RGCC/IFNG	4
GO:0002517	GO:0002517	T cell tolerance induction	1/74	14/18723	0.053952	0.132835	0.0860243	IL2RA	1
GO:0006596	GO:0006596	polyamine biosynthetic process	1/74	14/18723	0.053952	0.132835	0.0860243	ODC1	1
GO:0031650	GO:0031650	regulation of heat generation	1/74	14/18723	0.053952	0.132835	0.0860243	TNF	1
GO:0032688	GO:0032688	negative regulation of interferon-beta production	1/74	14/18723	0.053952	0.132835	0.0860243	REL	1
GO:0033212	GO:0033212	iron import into cell	1/74	14/18723	0.053952	0.132835	0.0860243	IFNG	1
GO:0035437	GO:0035437	maintenance of protein localization in endoplasmic reticulum	1/74	14/18723	0.053952	0.132835	0.0860243	INSIG1	1
GO:0043374	GO:0043374	CD8-positive, alpha-beta T cell differentiation	1/74	14/18723	0.053952	0.132835	0.0860243	TNFSF8	1
GO:0043922	GO:0043922	negative regulation by host of viral transcription	1/74	14/18723	0.053952	0.132835	0.0860243	CCL4	1
GO:0045579	GO:0045579	positive regulation of B cell differentiation	1/74	14/18723	0.053952	0.132835	0.0860243	IL2	1
GO:0046325	GO:0046325	negative regulation of glucose import	1/74	14/18723	0.053952	0.132835	0.0860243	TNF	1
GO:0046655	GO:0046655	folic acid metabolic process	1/74	14/18723	0.053952	0.132835	0.0860243	MTHFD2	1
GO:0061043	GO:0061043	regulation of vascular wound healing	1/74	14/18723	0.053952	0.132835	0.0860243	TNF	1
GO:0070278	GO:0070278	extracellular matrix constituent secretion	1/74	14/18723	0.053952	0.132835	0.0860243	RGCC	1
GO:0072540	GO:0072540	T-helper 17 cell lineage commitment	1/74	14/18723	0.053952	0.132835	0.0860243	IRF4	1
GO:1903894	GO:1903894	regulation of IRE1-mediated unfolded protein response	1/74	14/18723	0.053952	0.132835	0.0860243	BCL2L11	1
GO:2001171	GO:2001171	positive regulation of ATP biosynthetic process	1/74	14/18723	0.053952	0.132835	0.0860243	IL4	1
GO:0009612	GO:0009612	response to mechanical stimulus	3/74	216/18723	0.0540649	0.132973	0.0861136	IL13/NFKBIA/TNFSF14	3
GO:0035592	GO:0035592	establishment of protein localization to extracellular region	4/74	360/18723	0.0542006	0.133167	0.0862392	IL13/TNF/PIM3/IFNG	4
GO:0050764	GO:0050764	regulation of phagocytosis	2/74	95/18723	0.0543668	0.133296	0.0863222	TNF/IFNG	2
GO:1990823	GO:1990823	response to leukemia inhibitory factor	2/74	95/18723	0.0543668	0.133296	0.0863222	MAT2A/NCL	2
GO:0007163	GO:0007163	establishment or maintenance of cell polarity	3/74	218/18723	0.0552831	0.134141	0.0868698	LMNA/HSP90AB1/CCL4	3
GO:0045088	GO:0045088	regulation of innate immune response	3/74	218/18723	0.0552831	0.134141	0.0868698	SERPINB9/HSP90AB1/BIRC3	3
GO:0050803	GO:0050803	regulation of synapse structure or activity	3/74	218/18723	0.0552831	0.134141	0.0868698	TNF/SRGN/PRNP	3
GO:0001823	GO:0001823	mesonephros development	2/74	96/18723	0.055385	0.134141	0.0868698	MYC/SDC4	2
GO:0051098	GO:0051098	regulation of binding	4/74	363/18723	0.0555543	0.134141	0.0868698	IRF4/HSP90AB1/NFKBIA/IFNG	4
GO:2001020	GO:2001020	regulation of response to DNA damage stimulus	3/74	219/18723	0.0558971	0.134141	0.0868698	IER3/MYC/BCL2L1	3
GO:0050767	GO:0050767	regulation of neurogenesis	4/74	364/18723	0.0560096	0.134141	0.0868698	ID2/LTA/TNF/IFNG	4
GO:0010596	GO:0010596	negative regulation of endothelial cell migration	2/74	97/18723	0.05641	0.134141	0.0868698	TNF/RGCC	2
GO:0071219	GO:0071219	cellular response to molecule of bacterial origin	3/74	221/18723	0.057135	0.134141	0.0868698	CSF2/TNF/NFKBIA	3
GO:1903050	GO:1903050	regulation of proteolysis involved in cellular protein catabolic process	3/74	221/18723	0.057135	0.134141	0.0868698	PLK3/HSP90AB1/RNF19A	3
GO:0001701	GO:0001701	in utero embryonic development	4/74	367/18723	0.0573877	0.134141	0.0868698	BCL2L11/CSF2/ZFP36L1/BCL2L1	4
GO:0032642	GO:0032642	regulation of chemokine production	2/74	98/18723	0.0574417	0.134141	0.0868698	TNF/IFNG	2
GO:0043502	GO:0043502	regulation of muscle adaptation	2/74	98/18723	0.0574417	0.134141	0.0868698	LMNA/NR4A3	2
GO:0070301	GO:0070301	cellular response to hydrogen peroxide	2/74	98/18723	0.0574417	0.134141	0.0868698	NR4A3/KDM6B	2
GO:1904029	GO:1904029	regulation of cyclin-dependent protein kinase activity	2/74	98/18723	0.0574417	0.134141	0.0868698	HSP90AB1/RGCC	2
GO:0002730	GO:0002730	regulation of dendritic cell cytokine production	1/74	15/18723	0.0576939	0.134141	0.0868698	DDX21	1
GO:0006878	GO:0006878	cellular copper ion homeostasis	1/74	15/18723	0.0576939	0.134141	0.0868698	PRNP	1
GO:0007000	GO:0007000	nucleolus organization	1/74	15/18723	0.0576939	0.134141	0.0868698	NOLC1	1
GO:0010820	GO:0010820	positive regulation of T cell chemotaxis	1/74	15/18723	0.0576939	0.134141	0.0868698	XCL1	1
GO:0014841	GO:0014841	skeletal muscle satellite cell proliferation	1/74	15/18723	0.0576939	0.134141	0.0868698	CFLAR	1
GO:0014857	GO:0014857	regulation of skeletal muscle cell proliferation	1/74	15/18723	0.0576939	0.134141	0.0868698	CFLAR	1
GO:0015671	GO:0015671	oxygen transport	1/74	15/18723	0.0576939	0.134141	0.0868698	MYC	1
GO:0023035	GO:0023035	CD40 signaling pathway	1/74	15/18723	0.0576939	0.134141	0.0868698	CD40LG	1
GO:0032933	GO:0032933	SREBP signaling pathway	1/74	15/18723	0.0576939	0.134141	0.0868698	INSIG1	1
GO:0035358	GO:0035358	regulation of peroxisome proliferator activated receptor signaling pathway	1/74	15/18723	0.0576939	0.134141	0.0868698	FABP5	1
GO:0036124	GO:0036124	histone H3-K9 trimethylation	1/74	15/18723	0.0576939	0.134141	0.0868698	LMNA	1
GO:0042976	GO:0042976	activation of Janus kinase activity	1/74	15/18723	0.0576939	0.134141	0.0868698	IL4	1
GO:0042994	GO:0042994	cytoplasmic sequestering of transcription factor	1/74	15/18723	0.0576939	0.134141	0.0868698	NFKBIA	1
GO:0044406	GO:0044406	adhesion of symbiont to host	1/74	15/18723	0.0576939	0.134141	0.0868698	HSP90AB1	1
GO:0045064	GO:0045064	T-helper 2 cell differentiation	1/74	15/18723	0.0576939	0.134141	0.0868698	IL4	1
GO:0045475	GO:0045475	locomotor rhythm	1/74	15/18723	0.0576939	0.134141	0.0868698	ID2	1
GO:0046007	GO:0046007	negative regulation of activated T cell proliferation	1/74	15/18723	0.0576939	0.134141	0.0868698	PRNP	1
GO:0046321	GO:0046321	positive regulation of fatty acid oxidation	1/74	15/18723	0.0576939	0.134141	0.0868698	NR4A3	1
GO:0046500	GO:0046500	S-adenosylmethionine metabolic process	1/74	15/18723	0.0576939	0.134141	0.0868698	MAT2A	1
GO:0048308	GO:0048308	organelle inheritance	1/74	15/18723	0.0576939	0.134141	0.0868698	PLK3	1
GO:0048313	GO:0048313	Golgi inheritance	1/74	15/18723	0.0576939	0.134141	0.0868698	PLK3	1
GO:0048569	GO:0048569	post-embryonic animal organ development	1/74	15/18723	0.0576939	0.134141	0.0868698	BCL2L11	1
GO:0051608	GO:0051608	histamine transport	1/74	15/18723	0.0576939	0.134141	0.0868698	CSF2	1
GO:0055012	GO:0055012	ventricular cardiac muscle cell differentiation	1/74	15/18723	0.0576939	0.134141	0.0868698	LMNA	1
GO:0070885	GO:0070885	negative regulation of calcineurin-NFAT signaling cascade	1/74	15/18723	0.0576939	0.134141	0.0868698	PRNP	1
GO:0070886	GO:0070886	positive regulation of calcineurin-NFAT signaling cascade	1/74	15/18723	0.0576939	0.134141	0.0868698	TNF	1
GO:0072075	GO:0072075	metanephric mesenchyme development	1/74	15/18723	0.0576939	0.134141	0.0868698	MYC	1
GO:0090110	GO:0090110	COPII-coated vesicle cargo loading	1/74	15/18723	0.0576939	0.134141	0.0868698	INSIG1	1
GO:0099170	GO:0099170	postsynaptic modulation of chemical synaptic transmission	1/74	15/18723	0.0576939	0.134141	0.0868698	RNF19A	1
GO:0106057	GO:0106057	negative regulation of calcineurin-mediated signaling	1/74	15/18723	0.0576939	0.134141	0.0868698	PRNP	1
GO:0106058	GO:0106058	positive regulation of calcineurin-mediated signaling	1/74	15/18723	0.0576939	0.134141	0.0868698	TNF	1
GO:1900153	GO:1900153	positive regulation of nuclear-transcribed mRNA catabolic process, deadenylation-dependent decay	1/74	15/18723	0.0576939	0.134141	0.0868698	ZFP36L1	1
GO:1901741	GO:1901741	positive regulation of myoblast fusion	1/74	15/18723	0.0576939	0.134141	0.0868698	IL4	1
GO:1901836	GO:1901836	regulation of transcription of nucleolar large rRNA by RNA polymerase I	1/74	15/18723	0.0576939	0.134141	0.0868698	NCL	1
GO:1903799	GO:1903799	negative regulation of production of miRNAs involved in gene silencing by miRNA	1/74	15/18723	0.0576939	0.134141	0.0868698	TNF	1
GO:2000345	GO:2000345	regulation of hepatocyte proliferation	1/74	15/18723	0.0576939	0.134141	0.0868698	CFLAR	1
GO:2001279	GO:2001279	regulation of unsaturated fatty acid biosynthetic process	1/74	15/18723	0.0576939	0.134141	0.0868698	FABP5	1
GO:0071692	GO:0071692	protein localization to extracellular region	4/74	368/18723	0.0578511	0.134373	0.0870201	IL13/TNF/PIM3/IFNG	4
GO:0003300	GO:0003300	cardiac muscle hypertrophy	2/74	99/18723	0.0584799	0.135564	0.0877916	LMNA/NR4A3	2
GO:0032602	GO:0032602	chemokine production	2/74	99/18723	0.0584799	0.135564	0.0877916	TNF/IFNG	2
GO:0110020	GO:0110020	regulation of actomyosin structure organization	2/74	100/18723	0.0595247	0.13785	0.0892716	RGCC/SDC4	2
GO:0010001	GO:0010001	glial cell differentiation	3/74	225/18723	0.0596498	0.137867	0.0892824	ID2/TNF/IFNG	3
GO:0016485	GO:0016485	protein processing	3/74	225/18723	0.0596498	0.137867	0.0892824	SRGN/VSIR/PRNP	3
GO:0098657	GO:0098657	import into cell	3/74	227/18723	0.0609267	0.13921	0.0901521	SLC7A5/PRNP/IFNG	3
GO:0002253	GO:0002253	activation of immune response	4/74	375/18723	0.0611518	0.13921	0.0901521	NR4A3/RGCC/PRNP/NFKBID	4
GO:0002371	GO:0002371	dendritic cell cytokine production	1/74	16/18723	0.0614212	0.13921	0.0901521	DDX21	1
GO:0002827	GO:0002827	positive regulation of T-helper 1 type immune response	1/74	16/18723	0.0614212	0.13921	0.0901521	XCL1	1
GO:0010819	GO:0010819	regulation of T cell chemotaxis	1/74	16/18723	0.0614212	0.13921	0.0901521	XCL1	1
GO:0016074	GO:0016074	sno(s)RNA metabolic process	1/74	16/18723	0.0614212	0.13921	0.0901521	NOLC1	1
GO:0034116	GO:0034116	positive regulation of heterotypic cell-cell adhesion	1/74	16/18723	0.0614212	0.13921	0.0901521	TNF	1
GO:0034393	GO:0034393	positive regulation of smooth muscle cell apoptotic process	1/74	16/18723	0.0614212	0.13921	0.0901521	IFNG	1
GO:0045651	GO:0045651	positive regulation of macrophage differentiation	1/74	16/18723	0.0614212	0.13921	0.0901521	ID2	1
GO:0048557	GO:0048557	embryonic digestive tract morphogenesis	1/74	16/18723	0.0614212	0.13921	0.0901521	ID2	1
GO:0060330	GO:0060330	regulation of response to interferon-gamma	1/74	16/18723	0.0614212	0.13921	0.0901521	HSP90AB1	1
GO:0060334	GO:0060334	regulation of interferon-gamma-mediated signaling pathway	1/74	16/18723	0.0614212	0.13921	0.0901521	HSP90AB1	1
GO:0061684	GO:0061684	chaperone-mediated autophagy	1/74	16/18723	0.0614212	0.13921	0.0901521	PLK3	1
GO:0070242	GO:0070242	thymocyte apoptotic process	1/74	16/18723	0.0614212	0.13921	0.0901521	BCL2L11	1
GO:0070431	GO:0070431	nucleotide-binding oligomerization domain containing 2 signaling pathway	1/74	16/18723	0.0614212	0.13921	0.0901521	NFKBIA	1
GO:0071391	GO:0071391	cellular response to estrogen stimulus	1/74	16/18723	0.0614212	0.13921	0.0901521	SERPINB9	1
GO:0071501	GO:0071501	cellular response to sterol depletion	1/74	16/18723	0.0614212	0.13921	0.0901521	INSIG1	1
GO:0071732	GO:0071732	cellular response to nitric oxide	1/74	16/18723	0.0614212	0.13921	0.0901521	CFLAR	1
GO:0072109	GO:0072109	glomerular mesangium development	1/74	16/18723	0.0614212	0.13921	0.0901521	CFLAR	1
GO:1901201	GO:1901201	regulation of extracellular matrix assembly	1/74	16/18723	0.0614212	0.13921	0.0901521	RGCC	1
GO:0014897	GO:0014897	striated muscle hypertrophy	2/74	102/18723	0.0616337	0.139421	0.090289	LMNA/NR4A3	2
GO:0045833	GO:0045833	negative regulation of lipid metabolic process	2/74	102/18723	0.0616337	0.139421	0.090289	TNF/INSIG1	2
GO:0045055	GO:0045055	regulated exocytosis	3/74	230/18723	0.062866	0.141934	0.0919164	IL13/IL4/NR4A3	3
GO:0045333	GO:0045333	cellular respiration	3/74	230/18723	0.062866	0.141934	0.0919164	IL4/NR4A3/IFNG	3
GO:0014896	GO:0014896	muscle hypertrophy	2/74	104/18723	0.063768	0.143693	0.0930556	LMNA/NR4A3	2
GO:0032963	GO:0032963	collagen metabolic process	2/74	104/18723	0.063768	0.143693	0.0930556	VSIR/RGCC	2
GO:0010594	GO:0010594	regulation of endothelial cell migration	3/74	232/18723	0.0641748	0.144471	0.0935591	TNF/RGCC/MAP2K3	3
GO:0032231	GO:0032231	regulation of actin filament bundle assembly	2/74	105/18723	0.0648445	0.145232	0.0940523	RGCC/SDC4	2
GO:0007096	GO:0007096	regulation of exit from mitosis	1/74	17/18723	0.065134	0.145232	0.0940523	RGCC	1
GO:0010612	GO:0010612	regulation of cardiac muscle adaptation	1/74	17/18723	0.065134	0.145232	0.0940523	LMNA	1
GO:0014856	GO:0014856	skeletal muscle cell proliferation	1/74	17/18723	0.065134	0.145232	0.0940523	CFLAR	1
GO:0051797	GO:0051797	regulation of hair follicle development	1/74	17/18723	0.065134	0.145232	0.0940523	TNF	1
GO:0060644	GO:0060644	mammary gland epithelial cell differentiation	1/74	17/18723	0.065134	0.145232	0.0940523	ID2	1
GO:0061158	GO:0061158	3'-UTR-mediated mRNA destabilization	1/74	17/18723	0.065134	0.145232	0.0940523	ZFP36L1	1
GO:1901550	GO:1901550	regulation of endothelial cell development	1/74	17/18723	0.065134	0.145232	0.0940523	TNF	1
GO:1903140	GO:1903140	regulation of establishment of endothelial barrier	1/74	17/18723	0.065134	0.145232	0.0940523	TNF	1
GO:1903242	GO:1903242	regulation of cardiac muscle hypertrophy in response to stress	1/74	17/18723	0.065134	0.145232	0.0940523	LMNA	1
GO:0014706	GO:0014706	striated muscle tissue development	4/74	384/18723	0.0655404	0.145999	0.094549	LMNA/ID2/CFLAR/KDM6B	4
GO:0006090	GO:0006090	pyruvate metabolic process	2/74	106/18723	0.0659272	0.14641	0.0948154	NR4A3/IFNG	2
GO:0030038	GO:0030038	contractile actin filament bundle assembly	2/74	106/18723	0.0659272	0.14641	0.0948154	RGCC/SDC4	2
GO:0043149	GO:0043149	stress fiber assembly	2/74	106/18723	0.0659272	0.14641	0.0948154	RGCC/SDC4	2
GO:0042326	GO:0042326	negative regulation of phosphorylation	4/74	385/18723	0.0660381	0.14641	0.0948154	IL2/PRNP/GADD45B/IFNG	4
GO:0045786	GO:0045786	negative regulation of cell cycle	4/74	385/18723	0.0660381	0.14641	0.0948154	PLK3/TNF/RGCC/ZFP36L1	4
GO:0030072	GO:0030072	peptide hormone secretion	3/74	236/18723	0.0668303	0.147887	0.0957714	TNF/PIM3/IFNG	3
GO:0048738	GO:0048738	cardiac muscle tissue development	3/74	236/18723	0.0668303	0.147887	0.0957714	LMNA/ID2/KDM6B	3
GO:0000018	GO:0000018	regulation of DNA recombination	2/74	107/18723	0.0670159	0.148017	0.095856	IL2/IL4	2
GO:2000060	GO:2000060	positive regulation of ubiquitin-dependent protein catabolic process	2/74	107/18723	0.0670159	0.148017	0.095856	PLK3/RNF19A	2
GO:1901617	GO:1901617	organic hydroxy compound biosynthetic process	3/74	237/18723	0.067502	0.148298	0.0960376	TNF/INSIG1/IFNG	3
GO:0098659	GO:0098659	inorganic cation import across plasma membrane	2/74	108/18723	0.0681107	0.148298	0.0960376	PRNP/IFNG	2
GO:0099587	GO:0099587	inorganic ion import across plasma membrane	2/74	108/18723	0.0681107	0.148298	0.0960376	PRNP/IFNG	2
GO:0051259	GO:0051259	protein complex oligomerization	3/74	238/18723	0.0681768	0.148298	0.0960376	MAT2A/NINJ1/PRNP	3
GO:1901987	GO:1901987	regulation of cell cycle phase transition	4/74	390/18723	0.0685561	0.148298	0.0960376	PLK3/ID2/RGCC/ZFP36L1	4
GO:0002295	GO:0002295	T-helper cell lineage commitment	1/74	18/18723	0.0688323	0.148298	0.0960376	IRF4	1
GO:0002643	GO:0002643	regulation of tolerance induction	1/74	18/18723	0.0688323	0.148298	0.0960376	IL2RA	1
GO:0006595	GO:0006595	polyamine metabolic process	1/74	18/18723	0.0688323	0.148298	0.0960376	ODC1	1
GO:0006991	GO:0006991	response to sterol depletion	1/74	18/18723	0.0688323	0.148298	0.0960376	INSIG1	1
GO:0007250	GO:0007250	activation of NF-kappaB-inducing kinase activity	1/74	18/18723	0.0688323	0.148298	0.0960376	TRAF4	1
GO:0030730	GO:0030730	sequestering of triglyceride	1/74	18/18723	0.0688323	0.148298	0.0960376	TNF	1
GO:0031649	GO:0031649	heat generation	1/74	18/18723	0.0688323	0.148298	0.0960376	TNF	1
GO:0042790	GO:0042790	nucleolar large rRNA transcription by RNA polymerase I	1/74	18/18723	0.0688323	0.148298	0.0960376	NCL	1
GO:0045187	GO:0045187	regulation of circadian sleep/wake cycle, sleep	1/74	18/18723	0.0688323	0.148298	0.0960376	CSF2	1
GO:0045953	GO:0045953	negative regulation of natural killer cell mediated cytotoxicity	1/74	18/18723	0.0688323	0.148298	0.0960376	SERPINB9	1
GO:0048535	GO:0048535	lymph node development	1/74	18/18723	0.0688323	0.148298	0.0960376	LTA	1
GO:0051782	GO:0051782	negative regulation of cell division	1/74	18/18723	0.0688323	0.148298	0.0960376	MYC	1
GO:0055070	GO:0055070	copper ion homeostasis	1/74	18/18723	0.0688323	0.148298	0.0960376	PRNP	1
GO:0060546	GO:0060546	negative regulation of necroptotic process	1/74	18/18723	0.0688323	0.148298	0.0960376	BIRC3	1
GO:0060749	GO:0060749	mammary gland alveolus development	1/74	18/18723	0.0688323	0.148298	0.0960376	ID2	1
GO:0061377	GO:0061377	mammary gland lobule development	1/74	18/18723	0.0688323	0.148298	0.0960376	ID2	1
GO:0097094	GO:0097094	craniofacial suture morphogenesis	1/74	18/18723	0.0688323	0.148298	0.0960376	INSIG1	1
GO:0150078	GO:0150078	positive regulation of neuroinflammatory response	1/74	18/18723	0.0688323	0.148298	0.0960376	TNF	1
GO:0150079	GO:0150079	negative regulation of neuroinflammatory response	1/74	18/18723	0.0688323	0.148298	0.0960376	IL4	1
GO:1900151	GO:1900151	regulation of nuclear-transcribed mRNA catabolic process, deadenylation-dependent decay	1/74	18/18723	0.0688323	0.148298	0.0960376	ZFP36L1	1
GO:1902170	GO:1902170	cellular response to reactive nitrogen species	1/74	18/18723	0.0688323	0.148298	0.0960376	CFLAR	1
GO:0072593	GO:0072593	reactive oxygen species metabolic process	3/74	239/18723	0.0688548	0.148298	0.0960376	PRDX1/CFLAR/TNF	3
GO:0002456	GO:0002456	T cell mediated immunity	2/74	109/18723	0.0692114	0.148929	0.0964462	XCL1/IL4	2
GO:0044843	GO:0044843	cell cycle G1/S phase transition	3/74	241/18723	0.0702199	0.150893	0.0977186	PLK3/ID2/RGCC	3
GO:0032611	GO:0032611	interleukin-1 beta production	2/74	110/18723	0.070318	0.150893	0.0977186	TNF/IFNG	2
GO:0032651	GO:0032651	regulation of interleukin-1 beta production	2/74	110/18723	0.070318	0.150893	0.0977186	TNF/IFNG	2
GO:0002790	GO:0002790	peptide secretion	3/74	242/18723	0.0709071	0.152018	0.0984469	TNF/PIM3/IFNG	3
GO:0090288	GO:0090288	negative regulation of cellular response to growth factor stimulus	2/74	111/18723	0.0714304	0.152737	0.0989128	CFLAR/IL4	2
GO:0002281	GO:0002281	macrophage activation involved in immune response	1/74	19/18723	0.0725161	0.152737	0.0989128	IFNG	1
GO:0002523	GO:0002523	leukocyte migration involved in inflammatory response	1/74	19/18723	0.0725161	0.152737	0.0989128	NINJ1	1
GO:0002716	GO:0002716	negative regulation of natural killer cell mediated immunity	1/74	19/18723	0.0725161	0.152737	0.0989128	SERPINB9	1
GO:0002888	GO:0002888	positive regulation of myeloid leukocyte mediated immunity	1/74	19/18723	0.0725161	0.152737	0.0989128	DDX21	1
GO:0002902	GO:0002902	regulation of B cell apoptotic process	1/74	19/18723	0.0725161	0.152737	0.0989128	IL2	1
GO:0006977	GO:0006977	DNA damage response, signal transduction by p53 class mediator resulting in cell cycle arrest	1/74	19/18723	0.0725161	0.152737	0.0989128	PLK3	1
GO:0010744	GO:0010744	positive regulation of macrophage derived foam cell differentiation	1/74	19/18723	0.0725161	0.152737	0.0989128	CSF2	1
GO:0036498	GO:0036498	IRE1-mediated unfolded protein response	1/74	19/18723	0.0725161	0.152737	0.0989128	BCL2L11	1
GO:0042474	GO:0042474	middle ear morphogenesis	1/74	19/18723	0.0725161	0.152737	0.0989128	INSIG1	1
GO:0043031	GO:0043031	negative regulation of macrophage activation	1/74	19/18723	0.0725161	0.152737	0.0989128	IL4	1
GO:0044320	GO:0044320	cellular response to leptin stimulus	1/74	19/18723	0.0725161	0.152737	0.0989128	NR4A3	1
GO:0045618	GO:0045618	positive regulation of keratinocyte differentiation	1/74	19/18723	0.0725161	0.152737	0.0989128	ZBED2	1
GO:0045821	GO:0045821	positive regulation of glycolytic process	1/74	19/18723	0.0725161	0.152737	0.0989128	IFNG	1
GO:0046653	GO:0046653	tetrahydrofolate metabolic process	1/74	19/18723	0.0725161	0.152737	0.0989128	MTHFD2	1
GO:0062099	GO:0062099	negative regulation of programmed necrotic cell death	1/74	19/18723	0.0725161	0.152737	0.0989128	BIRC3	1
GO:0072074	GO:0072074	kidney mesenchyme development	1/74	19/18723	0.0725161	0.152737	0.0989128	MYC	1
GO:1903204	GO:1903204	negative regulation of oxidative stress-induced neuron death	1/74	19/18723	0.0725161	0.152737	0.0989128	NR4A3	1
GO:2000269	GO:2000269	regulation of fibroblast apoptotic process	1/74	19/18723	0.0725161	0.152737	0.0989128	BCL2L11	1
GO:0002526	GO:0002526	acute inflammatory response	2/74	112/18723	0.0725487	0.152737	0.0989128	IL4/TNF	2
GO:0017148	GO:0017148	negative regulation of translation	3/74	245/18723	0.072987	0.153522	0.099421	NCL/GZMB/ZFP36L1	3
GO:1901800	GO:1901800	positive regulation of proteasomal protein catabolic process	2/74	114/18723	0.0748022	0.157199	0.101802	PLK3/RNF19A	2
GO:0021537	GO:0021537	telencephalon development	3/74	248/18723	0.0750942	0.157558	0.102035	ID2/BCL2A1/KDM6B	3
GO:0060537	GO:0060537	muscle tissue development	4/74	403/18723	0.075334	0.157558	0.102035	LMNA/ID2/CFLAR/KDM6B	4
GO:0046883	GO:0046883	regulation of hormone secretion	3/74	249/18723	0.0758026	0.157558	0.102035	TNF/PIM3/IFNG	3
GO:1901988	GO:1901988	negative regulation of cell cycle phase transition	3/74	249/18723	0.0758026	0.157558	0.102035	PLK3/RGCC/ZFP36L1	3
GO:0043279	GO:0043279	response to alkaloid	2/74	115/18723	0.0759373	0.157558	0.102035	HSP90AB1/BCL2L1	2
GO:0051209	GO:0051209	release of sequestered calcium ion into cytosol	2/74	115/18723	0.0759373	0.157558	0.102035	XCL1/IL13	2
GO:0000083	GO:0000083	regulation of transcription involved in G1/S transition of mitotic cell cycle	1/74	20/18723	0.0761856	0.157558	0.102035	ID2	1
GO:0015669	GO:0015669	gas transport	1/74	20/18723	0.0761856	0.157558	0.102035	MYC	1
GO:0030150	GO:0030150	protein import into mitochondrial matrix	1/74	20/18723	0.0761856	0.157558	0.102035	TOMM40	1
GO:0032495	GO:0032495	response to muramyl dipeptide	1/74	20/18723	0.0761856	0.157558	0.102035	NFKBIA	1
GO:0032986	GO:0032986	protein-DNA complex disassembly	1/74	20/18723	0.0761856	0.157558	0.102035	MYC	1
GO:0033141	GO:0033141	positive regulation of peptidyl-serine phosphorylation of STAT protein	1/74	20/18723	0.0761856	0.157558	0.102035	IFNG	1
GO:0039535	GO:0039535	regulation of RIG-I signaling pathway	1/74	20/18723	0.0761856	0.157558	0.102035	BIRC3	1
GO:0071731	GO:0071731	response to nitric oxide	1/74	20/18723	0.0761856	0.157558	0.102035	CFLAR	1
GO:0072567	GO:0072567	chemokine (C-X-C motif) ligand 2 production	1/74	20/18723	0.0761856	0.157558	0.102035	TNF	1
GO:1902236	GO:1902236	negative regulation of endoplasmic reticulum stress-induced intrinsic apoptotic signaling pathway	1/74	20/18723	0.0761856	0.157558	0.102035	BCL2L1	1
GO:1903206	GO:1903206	negative regulation of hydrogen peroxide-induced cell death	1/74	20/18723	0.0761856	0.157558	0.102035	NR4A3	1
GO:2000341	GO:2000341	regulation of chemokine (C-X-C motif) ligand 2 production	1/74	20/18723	0.0761856	0.157558	0.102035	TNF	1
GO:0021782	GO:0021782	glial cell development	2/74	116/18723	0.077078	0.158982	0.102957	TNF/IFNG	2
GO:0043200	GO:0043200	response to amino acid	2/74	116/18723	0.077078	0.158982	0.102957	TNF/BCL2L1	2
GO:0051283	GO:0051283	negative regulation of sequestering of calcium ion	2/74	116/18723	0.077078	0.158982	0.102957	XCL1/IL13	2
GO:0014902	GO:0014902	myotube differentiation	2/74	117/18723	0.0782242	0.160851	0.104167	CFLAR/IL4	2
GO:1903828	GO:1903828	negative regulation of cellular protein localization	2/74	117/18723	0.0782242	0.160851	0.104167	INSIG1/BCL2L1	2
GO:0009743	GO:0009743	response to carbohydrate	3/74	253/18723	0.0786661	0.160851	0.104167	NAMPT/ZFP36L1/PIM3	3
GO:0097305	GO:0097305	response to alcohol	3/74	253/18723	0.0786661	0.160851	0.104167	IL2/IL13/BCL2L1	3
GO:0022612	GO:0022612	gland morphogenesis	2/74	118/18723	0.0793757	0.160851	0.104167	CFLAR/TNF	2
GO:0045446	GO:0045446	endothelial cell differentiation	2/74	118/18723	0.0793757	0.160851	0.104167	TNF/KDM6B	2
GO:0051282	GO:0051282	regulation of sequestering of calcium ion	2/74	118/18723	0.0793757	0.160851	0.104167	XCL1/IL13	2
GO:1903313	GO:1903313	positive regulation of mRNA metabolic process	2/74	118/18723	0.0793757	0.160851	0.104167	NCL/ZFP36L1	2
GO:0007252	GO:0007252	I-kappaB phosphorylation	1/74	21/18723	0.0798407	0.160851	0.104167	TNF	1
GO:0030502	GO:0030502	negative regulation of bone mineralization	1/74	21/18723	0.0798407	0.160851	0.104167	SRGN	1
GO:0032516	GO:0032516	positive regulation of phosphoprotein phosphatase activity	1/74	21/18723	0.0798407	0.160851	0.104167	HSP90AB1	1
GO:0035330	GO:0035330	regulation of hippo signaling	1/74	21/18723	0.0798407	0.160851	0.104167	MAP2K3	1
GO:0043373	GO:0043373	CD4-positive, alpha-beta T cell lineage commitment	1/74	21/18723	0.0798407	0.160851	0.104167	IRF4	1
GO:0044342	GO:0044342	type B pancreatic cell proliferation	1/74	21/18723	0.0798407	0.160851	0.104167	NR4A3	1
GO:0045717	GO:0045717	negative regulation of fatty acid biosynthetic process	1/74	21/18723	0.0798407	0.160851	0.104167	INSIG1	1
GO:0046641	GO:0046641	positive regulation of alpha-beta T cell proliferation	1/74	21/18723	0.0798407	0.160851	0.104167	XCL1	1
GO:0050802	GO:0050802	circadian sleep/wake cycle, sleep	1/74	21/18723	0.0798407	0.160851	0.104167	CSF2	1
GO:0050849	GO:0050849	negative regulation of calcium-mediated signaling	1/74	21/18723	0.0798407	0.160851	0.104167	PRNP	1
GO:0060445	GO:0060445	branching involved in salivary gland morphogenesis	1/74	21/18723	0.0798407	0.160851	0.104167	TNF	1
GO:0070269	GO:0070269	pyroptosis	1/74	21/18723	0.0798407	0.160851	0.104167	GZMB	1
GO:0070584	GO:0070584	mitochondrion morphogenesis	1/74	21/18723	0.0798407	0.160851	0.104167	BCL2L1	1
GO:0090026	GO:0090026	positive regulation of monocyte chemotaxis	1/74	21/18723	0.0798407	0.160851	0.104167	CCL1	1
GO:0097062	GO:0097062	dendritic spine maintenance	1/74	21/18723	0.0798407	0.160851	0.104167	PRNP	1
GO:1900118	GO:1900118	negative regulation of execution phase of apoptosis	1/74	21/18723	0.0798407	0.160851	0.104167	BCL2L1	1
GO:1901028	GO:1901028	regulation of mitochondrial outer membrane permeabilization involved in apoptotic signaling pathway	1/74	21/18723	0.0798407	0.160851	0.104167	GZMB	1
GO:1903427	GO:1903427	negative regulation of reactive oxygen species biosynthetic process	1/74	21/18723	0.0798407	0.160851	0.104167	CFLAR	1
GO:2000047	GO:2000047	regulation of cell-cell adhesion mediated by cadherin	1/74	21/18723	0.0798407	0.160851	0.104167	RGCC	1
GO:1903362	GO:1903362	regulation of cellular protein catabolic process	3/74	255/18723	0.0801156	0.161265	0.104436	PLK3/HSP90AB1/RNF19A	3
GO:0043434	GO:0043434	response to peptide hormone	4/74	414/18723	0.0813262	0.163562	0.105922	CFLAR/INSIG1/NR4A3/ZFP36L1	4
GO:0030218	GO:0030218	erythrocyte differentiation	2/74	120/18723	0.0816948	0.16388	0.106129	ID2/ZFP36L1	2
GO:0051897	GO:0051897	positive regulation of protein kinase B signaling	2/74	120/18723	0.0816948	0.16388	0.106129	TNF/HSP90AB1	2
GO:0072655	GO:0072655	establishment of protein localization to mitochondrion	2/74	120/18723	0.0816948	0.16388	0.106129	GZMB/TOMM40	2
GO:0045165	GO:0045165	cell fate commitment	3/74	258/18723	0.0823117	0.164502	0.106531	ID2/IRF4/KDM6B	3
GO:0002455	GO:0002455	humoral immune response mediated by circulating immunoglobulin	2/74	121/18723	0.0828623	0.164502	0.106531	LTA/TNF	2
GO:0042752	GO:0042752	regulation of circadian rhythm	2/74	121/18723	0.0828623	0.164502	0.106531	ID2/CSF2	2
GO:0016311	GO:0016311	dephosphorylation	4/74	417/18723	0.0830008	0.164502	0.106531	TNF/HSP90AB1/DUSP4/IFNG	4
GO:0002053	GO:0002053	positive regulation of mesenchymal cell proliferation	1/74	22/18723	0.0834816	0.164502	0.106531	MYC	1
GO:0032693	GO:0032693	negative regulation of interleukin-10 production	1/74	22/18723	0.0834816	0.164502	0.106531	VSIR	1
GO:0034755	GO:0034755	iron ion transmembrane transport	1/74	22/18723	0.0834816	0.164502	0.106531	IFNG	1
GO:0035357	GO:0035357	peroxisome proliferator activated receptor signaling pathway	1/74	22/18723	0.0834816	0.164502	0.106531	FABP5	1
GO:0035584	GO:0035584	calcium-mediated signaling using intracellular calcium source	1/74	22/18723	0.0834816	0.164502	0.106531	PRNP	1
GO:0042749	GO:0042749	regulation of circadian sleep/wake cycle	1/74	22/18723	0.0834816	0.164502	0.106531	CSF2	1
GO:0045624	GO:0045624	positive regulation of T-helper cell differentiation	1/74	22/18723	0.0834816	0.164502	0.106531	NFKBID	1
GO:0048026	GO:0048026	positive regulation of mRNA splicing, via spliceosome	1/74	22/18723	0.0834816	0.164502	0.106531	NCL	1
GO:0050860	GO:0050860	negative regulation of T cell receptor signaling pathway	1/74	22/18723	0.0834816	0.164502	0.106531	PRNP	1
GO:0051220	GO:0051220	cytoplasmic sequestering of protein	1/74	22/18723	0.0834816	0.164502	0.106531	NFKBIA	1
GO:0060713	GO:0060713	labyrinthine layer morphogenesis	1/74	22/18723	0.0834816	0.164502	0.106531	ZFP36L1	1
GO:0060965	GO:0060965	negative regulation of gene silencing by miRNA	1/74	22/18723	0.0834816	0.164502	0.106531	TNF	1
GO:0061042	GO:0061042	vascular wound healing	1/74	22/18723	0.0834816	0.164502	0.106531	TNF	1
GO:0072574	GO:0072574	hepatocyte proliferation	1/74	22/18723	0.0834816	0.164502	0.106531	CFLAR	1
GO:0072575	GO:0072575	epithelial cell proliferation involved in liver morphogenesis	1/74	22/18723	0.0834816	0.164502	0.106531	CFLAR	1
GO:1901032	GO:1901032	negative regulation of response to reactive oxygen species	1/74	22/18723	0.0834816	0.164502	0.106531	NR4A3	1
GO:2000773	GO:2000773	negative regulation of cellular senescence	1/74	22/18723	0.0834816	0.164502	0.106531	NAMPT	1
GO:0090150	GO:0090150	establishment of protein localization to membrane	3/74	260/18723	0.0837903	0.164971	0.106835	RILPL2/GZMB/PRNP	3
GO:0051208	GO:0051208	sequestering of calcium ion	2/74	122/18723	0.0840349	0.165313	0.107057	XCL1/IL13	2
GO:0050852	GO:0050852	T cell receptor signaling pathway	2/74	123/18723	0.0852126	0.167482	0.108461	PRNP/NFKBID	2
GO:0009636	GO:0009636	response to toxic substance	3/74	262/18723	0.0852804	0.167482	0.108461	PRDX1/KDM6B/CCL4	3
GO:0006816	GO:0006816	calcium ion transport	4/74	422/18723	0.0858297	0.167831	0.108687	XCL1/IL13/PRNP/CCL4	4
GO:0042060	GO:0042060	wound healing	4/74	422/18723	0.0858297	0.167831	0.108687	CFLAR/TNF/CD40LG/SDC4	4
GO:0043588	GO:0043588	skin development	3/74	263/18723	0.0860297	0.167831	0.108687	ZBED2/TNF/ZFP36L1	3
GO:0015833	GO:0015833	peptide transport	3/74	264/18723	0.0867819	0.167831	0.108687	TNF/PIM3/IFNG	3
GO:0032868	GO:0032868	response to insulin	3/74	264/18723	0.0867819	0.167831	0.108687	CFLAR/INSIG1/ZFP36L1	3
GO:0044772	GO:0044772	mitotic cell cycle phase transition	4/74	424/18723	0.0869745	0.167831	0.108687	PLK3/ID2/RGCC/ZFP36L1	4
GO:0002363	GO:0002363	alpha-beta T cell lineage commitment	1/74	23/18723	0.0871083	0.167831	0.108687	IRF4	1
GO:0019430	GO:0019430	removal of superoxide radicals	1/74	23/18723	0.0871083	0.167831	0.108687	PRDX1	1
GO:0033139	GO:0033139	regulation of peptidyl-serine phosphorylation of STAT protein	1/74	23/18723	0.0871083	0.167831	0.108687	IFNG	1
GO:0034105	GO:0034105	positive regulation of tissue remodeling	1/74	23/18723	0.0871083	0.167831	0.108687	IL2	1
GO:0035162	GO:0035162	embryonic hemopoiesis	1/74	23/18723	0.0871083	0.167831	0.108687	IL3	1
GO:0035994	GO:0035994	response to muscle stretch	1/74	23/18723	0.0871083	0.167831	0.108687	NFKBIA	1
GO:0043369	GO:0043369	CD4-positive or CD8-positive, alpha-beta T cell lineage commitment	1/74	23/18723	0.0871083	0.167831	0.108687	IRF4	1
GO:0045662	GO:0045662	negative regulation of myoblast differentiation	1/74	23/18723	0.0871083	0.167831	0.108687	TNF	1
GO:0045943	GO:0045943	positive regulation of transcription by RNA polymerase I	1/74	23/18723	0.0871083	0.167831	0.108687	NCL	1
GO:0051131	GO:0051131	chaperone-mediated protein complex assembly	1/74	23/18723	0.0871083	0.167831	0.108687	HSP90AB1	1
GO:0060143	GO:0060143	positive regulation of syncytium formation by plasma membrane fusion	1/74	23/18723	0.0871083	0.167831	0.108687	IL4	1
GO:0060487	GO:0060487	lung epithelial cell differentiation	1/74	23/18723	0.0871083	0.167831	0.108687	IL13	1
GO:0060547	GO:0060547	negative regulation of necrotic cell death	1/74	23/18723	0.0871083	0.167831	0.108687	BIRC3	1
GO:0071636	GO:0071636	positive regulation of transforming growth factor beta production	1/74	23/18723	0.0871083	0.167831	0.108687	XCL1	1
GO:0072576	GO:0072576	liver morphogenesis	1/74	23/18723	0.0871083	0.167831	0.108687	CFLAR	1
GO:2000810	GO:2000810	regulation of bicellular tight junction assembly	1/74	23/18723	0.0871083	0.167831	0.108687	TNF	1
GO:2001169	GO:2001169	regulation of ATP biosynthetic process	1/74	23/18723	0.0871083	0.167831	0.108687	IL4	1
GO:0055007	GO:0055007	cardiac muscle cell differentiation	2/74	125/18723	0.0875831	0.168468	0.1091	LMNA/KDM6B	2
GO:0070585	GO:0070585	protein localization to mitochondrion	2/74	125/18723	0.0875831	0.168468	0.1091	GZMB/TOMM40	2
GO:2001235	GO:2001235	positive regulation of apoptotic signaling pathway	2/74	126/18723	0.0887759	0.170622	0.110495	BCL2L11/TNF	2
GO:0043254	GO:0043254	regulation of protein-containing complex assembly	4/74	428/18723	0.0892866	0.170988	0.110732	BCL2L11/CSF2/TNF/IFNG	4
GO:0048565	GO:0048565	digestive tract development	2/74	127/18723	0.0899735	0.170988	0.110732	ID2/TNF	2
GO:0051224	GO:0051224	negative regulation of protein transport	2/74	127/18723	0.0899735	0.170988	0.110732	INSIG1/PIM3	2
GO:0001783	GO:0001783	B cell apoptotic process	1/74	24/18723	0.0907208	0.170988	0.110732	IL2	1
GO:0001911	GO:0001911	negative regulation of leukocyte mediated cytotoxicity	1/74	24/18723	0.0907208	0.170988	0.110732	SERPINB9	1
GO:0010155	GO:0010155	regulation of proton transport	1/74	24/18723	0.0907208	0.170988	0.110732	IL13	1
GO:0022410	GO:0022410	circadian sleep/wake cycle process	1/74	24/18723	0.0907208	0.170988	0.110732	CSF2	1
GO:0030810	GO:0030810	positive regulation of nucleotide biosynthetic process	1/74	24/18723	0.0907208	0.170988	0.110732	IL4	1
GO:0038095	GO:0038095	Fc-epsilon receptor signaling pathway	1/74	24/18723	0.0907208	0.170988	0.110732	NR4A3	1
GO:0039531	GO:0039531	regulation of viral-induced cytoplasmic pattern recognition receptor signaling pathway	1/74	24/18723	0.0907208	0.170988	0.110732	BIRC3	1
GO:0044321	GO:0044321	response to leptin	1/74	24/18723	0.0907208	0.170988	0.110732	NR4A3	1
GO:0045649	GO:0045649	regulation of macrophage differentiation	1/74	24/18723	0.0907208	0.170988	0.110732	ID2	1
GO:0051000	GO:0051000	positive regulation of nitric-oxide synthase activity	1/74	24/18723	0.0907208	0.170988	0.110732	TNF	1
GO:0051570	GO:0051570	regulation of histone H3-K9 methylation	1/74	24/18723	0.0907208	0.170988	0.110732	LMNA	1
GO:0060149	GO:0060149	negative regulation of posttranscriptional gene silencing	1/74	24/18723	0.0907208	0.170988	0.110732	TNF	1
GO:0060479	GO:0060479	lung cell differentiation	1/74	24/18723	0.0907208	0.170988	0.110732	IL13	1
GO:0060561	GO:0060561	apoptotic process involved in morphogenesis	1/74	24/18723	0.0907208	0.170988	0.110732	BCL2L11	1
GO:0060967	GO:0060967	negative regulation of gene silencing by RNA	1/74	24/18723	0.0907208	0.170988	0.110732	TNF	1
GO:0090023	GO:0090023	positive regulation of neutrophil chemotaxis	1/74	24/18723	0.0907208	0.170988	0.110732	XCL1	1
GO:0090343	GO:0090343	positive regulation of cell aging	1/74	24/18723	0.0907208	0.170988	0.110732	LMNA	1
GO:1900373	GO:1900373	positive regulation of purine nucleotide biosynthetic process	1/74	24/18723	0.0907208	0.170988	0.110732	IL4	1
GO:1903077	GO:1903077	negative regulation of protein localization to plasma membrane	1/74	24/18723	0.0907208	0.170988	0.110732	BCL2L1	1
GO:2000310	GO:2000310	regulation of NMDA receptor activity	1/74	24/18723	0.0907208	0.170988	0.110732	IFNG	1
GO:2000679	GO:2000679	positive regulation of transcription regulatory region DNA binding	1/74	24/18723	0.0907208	0.170988	0.110732	IFNG	1
GO:0032612	GO:0032612	interleukin-1 production	2/74	128/18723	0.0911759	0.171569	0.111108	TNF/IFNG	2
GO:0032652	GO:0032652	regulation of interleukin-1 production	2/74	128/18723	0.0911759	0.171569	0.111108	TNF/IFNG	2
GO:0007498	GO:0007498	mesoderm development	2/74	129/18723	0.0923831	0.173701	0.112489	ZFP36L1/KDM6B	2
GO:0043467	GO:0043467	regulation of generation of precursor metabolites and energy	2/74	130/18723	0.093595	0.174951	0.113298	IL4/IFNG	2
GO:0048732	GO:0048732	gland development	4/74	436/18723	0.0939999	0.174951	0.113298	ID2/BCL2L11/CFLAR/TNF	4
GO:0036315	GO:0036315	cellular response to sterol	1/74	25/18723	0.0943192	0.174951	0.113298	INSIG1	1
GO:0042832	GO:0042832	defense response to protozoan	1/74	25/18723	0.0943192	0.174951	0.113298	IRF4	1
GO:0045822	GO:0045822	negative regulation of heart contraction	1/74	25/18723	0.0943192	0.174951	0.113298	IL2	1
GO:0050995	GO:0050995	negative regulation of lipid catabolic process	1/74	25/18723	0.0943192	0.174951	0.113298	TNF	1
GO:0051204	GO:0051204	protein insertion into mitochondrial membrane	1/74	25/18723	0.0943192	0.174951	0.113298	GZMB	1
GO:0051291	GO:0051291	protein heterooligomerization	1/74	25/18723	0.0943192	0.174951	0.113298	MAT2A	1
GO:0071450	GO:0071450	cellular response to oxygen radical	1/74	25/18723	0.0943192	0.174951	0.113298	PRDX1	1
GO:0071451	GO:0071451	cellular response to superoxide	1/74	25/18723	0.0943192	0.174951	0.113298	PRDX1	1
GO:0072012	GO:0072012	glomerulus vasculature development	1/74	25/18723	0.0943192	0.174951	0.113298	CFLAR	1
GO:0090312	GO:0090312	positive regulation of protein deacetylation	1/74	25/18723	0.0943192	0.174951	0.113298	IFNG	1
GO:0098703	GO:0098703	calcium ion import across plasma membrane	1/74	25/18723	0.0943192	0.174951	0.113298	PRNP	1
GO:1903798	GO:1903798	regulation of production of miRNAs involved in gene silencing by miRNA	1/74	25/18723	0.0943192	0.174951	0.113298	TNF	1
GO:1903959	GO:1903959	regulation of anion transmembrane transport	1/74	25/18723	0.0943192	0.174951	0.113298	PRNP	1
GO:1904754	GO:1904754	positive regulation of vascular associated smooth muscle cell migration	1/74	25/18723	0.0943192	0.174951	0.113298	NR4A3	1
GO:1904996	GO:1904996	positive regulation of leukocyte adhesion to vascular endothelial cell	1/74	25/18723	0.0943192	0.174951	0.113298	TNF	1
GO:0000723	GO:0000723	telomere maintenance	2/74	131/18723	0.0948116	0.175585	0.113709	HSP90AB1/MYC	2
GO:1904950	GO:1904950	negative regulation of establishment of protein localization	2/74	131/18723	0.0948116	0.175585	0.113709	INSIG1/PIM3	2
GO:0050804	GO:0050804	modulation of chemical synaptic transmission	4/74	439/18723	0.0957976	0.177271	0.114801	TNF/RNF19A/SRGN/PRNP	4
GO:0006997	GO:0006997	nucleus organization	2/74	133/18723	0.0972586	0.178624	0.115677	LMNA/NOLC1	2
GO:1903052	GO:1903052	positive regulation of proteolysis involved in cellular protein catabolic process	2/74	133/18723	0.0972586	0.178624	0.115677	PLK3/RNF19A	2
GO:0001562	GO:0001562	response to protozoan	1/74	26/18723	0.0979036	0.178624	0.115677	IRF4	1
GO:0002710	GO:0002710	negative regulation of T cell mediated immunity	1/74	26/18723	0.0979036	0.178624	0.115677	XCL1	1
GO:0006760	GO:0006760	folic acid-containing compound metabolic process	1/74	26/18723	0.0979036	0.178624	0.115677	MTHFD2	1
GO:0009435	GO:0009435	NAD biosynthetic process	1/74	26/18723	0.0979036	0.178624	0.115677	NAMPT	1
GO:0010875	GO:0010875	positive regulation of cholesterol efflux	1/74	26/18723	0.0979036	0.178624	0.115677	NFKBIA	1
GO:0032515	GO:0032515	negative regulation of phosphoprotein phosphatase activity	1/74	26/18723	0.0979036	0.178624	0.115677	TNF	1
GO:0033598	GO:0033598	mammary gland epithelial cell proliferation	1/74	26/18723	0.0979036	0.178624	0.115677	ID2	1
GO:0034114	GO:0034114	regulation of heterotypic cell-cell adhesion	1/74	26/18723	0.0979036	0.178624	0.115677	TNF	1
GO:0042634	GO:0042634	regulation of hair cycle	1/74	26/18723	0.0979036	0.178624	0.115677	TNF	1
GO:0043501	GO:0043501	skeletal muscle adaptation	1/74	26/18723	0.0979036	0.178624	0.115677	CFLAR	1
GO:0060669	GO:0060669	embryonic placenta morphogenesis	1/74	26/18723	0.0979036	0.178624	0.115677	ZFP36L1	1
GO:0070920	GO:0070920	regulation of production of small RNA involved in gene silencing by RNA	1/74	26/18723	0.0979036	0.178624	0.115677	TNF	1
GO:1900017	GO:1900017	positive regulation of cytokine production involved in inflammatory response	1/74	26/18723	0.0979036	0.178624	0.115677	TNF	1
GO:1902656	GO:1902656	calcium ion import into cytosol	1/74	26/18723	0.0979036	0.178624	0.115677	PRNP	1
GO:1903523	GO:1903523	negative regulation of blood circulation	1/74	26/18723	0.0979036	0.178624	0.115677	IL2	1
GO:1904376	GO:1904376	negative regulation of protein localization to cell periphery	1/74	26/18723	0.0979036	0.178624	0.115677	BCL2L1	1
GO:0051960	GO:0051960	regulation of nervous system development	4/74	443/18723	0.0982201	0.179062	0.115961	ID2/LTA/TNF/IFNG	4
GO:0043542	GO:0043542	endothelial cell migration	3/74	279/18723	0.0983969	0.179245	0.116079	TNF/RGCC/MAP2K3	3
GO:0001101	GO:0001101	response to acid chemical	2/74	135/18723	0.0997236	0.18152	0.117553	TNF/BCL2L1	2
GO:0003158	GO:0003158	endothelium development	2/74	136/18723	0.100963	0.181876	0.117783	TNF/KDM6B	2
GO:0072073	GO:0072073	kidney epithelium development	2/74	136/18723	0.100963	0.181876	0.117783	MYC/SDC4	2
GO:1903305	GO:1903305	regulation of regulated secretory pathway	2/74	136/18723	0.100963	0.181876	0.117783	IL13/IL4	2
GO:0002227	GO:0002227	innate immune response in mucosa	1/74	27/18723	0.101474	0.181876	0.117783	IL4	1
GO:0002825	GO:0002825	regulation of T-helper 1 type immune response	1/74	27/18723	0.101474	0.181876	0.117783	XCL1	1
GO:0010894	GO:0010894	negative regulation of steroid biosynthetic process	1/74	27/18723	0.101474	0.181876	0.117783	INSIG1	1
GO:0032967	GO:0032967	positive regulation of collagen biosynthetic process	1/74	27/18723	0.101474	0.181876	0.117783	RGCC	1
GO:0034143	GO:0034143	regulation of toll-like receptor 4 signaling pathway	1/74	27/18723	0.101474	0.181876	0.117783	NINJ1	1
GO:0035459	GO:0035459	vesicle cargo loading	1/74	27/18723	0.101474	0.181876	0.117783	INSIG1	1
GO:0039529	GO:0039529	RIG-I signaling pathway	1/74	27/18723	0.101474	0.181876	0.117783	BIRC3	1
GO:0042501	GO:0042501	serine phosphorylation of STAT protein	1/74	27/18723	0.101474	0.181876	0.117783	IFNG	1
GO:0042745	GO:0042745	circadian sleep/wake cycle	1/74	27/18723	0.101474	0.181876	0.117783	CSF2	1
GO:0045606	GO:0045606	positive regulation of epidermal cell differentiation	1/74	27/18723	0.101474	0.181876	0.117783	ZBED2	1
GO:0048520	GO:0048520	positive regulation of behavior	1/74	27/18723	0.101474	0.181876	0.117783	NR4A3	1
GO:0061437	GO:0061437	renal system vasculature development	1/74	27/18723	0.101474	0.181876	0.117783	CFLAR	1
GO:0061440	GO:0061440	kidney vasculature development	1/74	27/18723	0.101474	0.181876	0.117783	CFLAR	1
GO:0070861	GO:0070861	regulation of protein exit from endoplasmic reticulum	1/74	27/18723	0.101474	0.181876	0.117783	INSIG1	1
GO:1902883	GO:1902883	negative regulation of response to oxidative stress	1/74	27/18723	0.101474	0.181876	0.117783	NR4A3	1
GO:1903203	GO:1903203	regulation of oxidative stress-induced neuron death	1/74	27/18723	0.101474	0.181876	0.117783	NR4A3	1
GO:1903205	GO:1903205	regulation of hydrogen peroxide-induced cell death	1/74	27/18723	0.101474	0.181876	0.117783	NR4A3	1
GO:0008203	GO:0008203	cholesterol metabolic process	2/74	137/18723	0.102206	0.182489	0.11818	IL4/INSIG1	2
GO:0030879	GO:0030879	mammary gland development	2/74	137/18723	0.102206	0.182489	0.11818	ID2/BCL2L11	2
GO:0045471	GO:0045471	response to ethanol	2/74	137/18723	0.102206	0.182489	0.11818	IL2/IL13	2
GO:0050684	GO:0050684	regulation of mRNA processing	2/74	137/18723	0.102206	0.182489	0.11818	NCL/ZFP36L1	2
GO:0055123	GO:0055123	digestive system development	2/74	137/18723	0.102206	0.182489	0.11818	ID2/TNF	2
GO:0003012	GO:0003012	muscle system process	4/74	452/18723	0.103776	0.18485	0.119709	LMNA/CFLAR/NR4A3/MAP2K3	4
GO:0030216	GO:0030216	keratinocyte differentiation	2/74	139/18723	0.104706	0.18485	0.119709	ZBED2/ZFP36L1	2
GO:0000303	GO:0000303	response to superoxide	1/74	28/18723	0.10503	0.18485	0.119709	PRDX1	1
GO:0002313	GO:0002313	mature B cell differentiation involved in immune response	1/74	28/18723	0.10503	0.18485	0.119709	IL2	1
GO:0002507	GO:0002507	tolerance induction	1/74	28/18723	0.10503	0.18485	0.119709	IL2RA	1
GO:0002675	GO:0002675	positive regulation of acute inflammatory response	1/74	28/18723	0.10503	0.18485	0.119709	TNF	1
GO:0007205	GO:0007205	protein kinase C-activating G protein-coupled receptor signaling pathway	1/74	28/18723	0.10503	0.18485	0.119709	IL2	1
GO:0010818	GO:0010818	T cell chemotaxis	1/74	28/18723	0.10503	0.18485	0.119709	XCL1	1
GO:0031440	GO:0031440	regulation of mRNA 3'-end processing	1/74	28/18723	0.10503	0.18485	0.119709	ZFP36L1	1
GO:0034123	GO:0034123	positive regulation of toll-like receptor signaling pathway	1/74	28/18723	0.10503	0.18485	0.119709	NINJ1	1
GO:0044331	GO:0044331	cell-cell adhesion mediated by cadherin	1/74	28/18723	0.10503	0.18485	0.119709	RGCC	1
GO:0045671	GO:0045671	negative regulation of osteoclast differentiation	1/74	28/18723	0.10503	0.18485	0.119709	IL4	1
GO:0051894	GO:0051894	positive regulation of focal adhesion assembly	1/74	28/18723	0.10503	0.18485	0.119709	SDC4	1
GO:0060259	GO:0060259	regulation of feeding behavior	1/74	28/18723	0.10503	0.18485	0.119709	NR4A3	1
GO:0070076	GO:0070076	histone lysine demethylation	1/74	28/18723	0.10503	0.18485	0.119709	KDM6B	1
GO:0071280	GO:0071280	cellular response to copper ion	1/74	28/18723	0.10503	0.18485	0.119709	PRNP	1
GO:0090200	GO:0090200	positive regulation of release of cytochrome c from mitochondria	1/74	28/18723	0.10503	0.18485	0.119709	BCL2L11	1
GO:0090344	GO:0090344	negative regulation of cell aging	1/74	28/18723	0.10503	0.18485	0.119709	NAMPT	1
GO:1902624	GO:1902624	positive regulation of neutrophil migration	1/74	28/18723	0.10503	0.18485	0.119709	XCL1	1
GO:0034599	GO:0034599	cellular response to oxidative stress	3/74	288/18723	0.105655	0.18581	0.12033	PRDX1/NR4A3/KDM6B	3
GO:0008584	GO:0008584	male gonad development	2/74	141/18723	0.107222	0.187142	0.121193	BCL2L11/BCL2L1	2
GO:0032355	GO:0032355	response to estradiol	2/74	141/18723	0.107222	0.187142	0.121193	BCL2L11/CFLAR	2
GO:0002429	GO:0002429	immune response-activating cell surface receptor signaling pathway	3/74	291/18723	0.10812	0.187142	0.121193	NR4A3/PRNP/NFKBID	3
GO:0002757	GO:0002757	immune response-activating signal transduction	3/74	291/18723	0.10812	0.187142	0.121193	NR4A3/PRNP/NFKBID	3
GO:0046546	GO:0046546	development of primary male sexual characteristics	2/74	142/18723	0.108487	0.187142	0.121193	BCL2L11/BCL2L1	2
GO:0072006	GO:0072006	nephron development	2/74	142/18723	0.108487	0.187142	0.121193	CFLAR/MYC	2
GO:0000305	GO:0000305	response to oxygen radical	1/74	29/18723	0.108573	0.187142	0.121193	PRDX1	1
GO:0001916	GO:0001916	positive regulation of T cell mediated cytotoxicity	1/74	29/18723	0.108573	0.187142	0.121193	XCL1	1
GO:0002360	GO:0002360	T cell lineage commitment	1/74	29/18723	0.108573	0.187142	0.121193	IRF4	1
GO:0006656	GO:0006656	phosphatidylcholine biosynthetic process	1/74	29/18723	0.108573	0.187142	0.121193	FABP5	1
GO:0010458	GO:0010458	exit from mitosis	1/74	29/18723	0.108573	0.187142	0.121193	RGCC	1
GO:0010955	GO:0010955	negative regulation of protein processing	1/74	29/18723	0.108573	0.187142	0.121193	PRNP	1
GO:0019359	GO:0019359	nicotinamide nucleotide biosynthetic process	1/74	29/18723	0.108573	0.187142	0.121193	NAMPT	1
GO:0019363	GO:0019363	pyridine nucleotide biosynthetic process	1/74	29/18723	0.108573	0.187142	0.121193	NAMPT	1
GO:0021772	GO:0021772	olfactory bulb development	1/74	29/18723	0.108573	0.187142	0.121193	ID2	1
GO:0043153	GO:0043153	entrainment of circadian clock by photoperiod	1/74	29/18723	0.108573	0.187142	0.121193	ID2	1
GO:0045737	GO:0045737	positive regulation of cyclin-dependent protein serine/threonine kinase activity	1/74	29/18723	0.108573	0.187142	0.121193	RGCC	1
GO:0060441	GO:0060441	epithelial tube branching involved in lung morphogenesis	1/74	29/18723	0.108573	0.187142	0.121193	TNF	1
GO:0060969	GO:0060969	negative regulation of gene silencing	1/74	29/18723	0.108573	0.187142	0.121193	TNF	1
GO:0071549	GO:0071549	cellular response to dexamethasone stimulus	1/74	29/18723	0.108573	0.187142	0.121193	CFLAR	1
GO:0090025	GO:0090025	regulation of monocyte chemotaxis	1/74	29/18723	0.108573	0.187142	0.121193	CCL1	1
GO:0090114	GO:0090114	COPII-coated vesicle budding	1/74	29/18723	0.108573	0.187142	0.121193	INSIG1	1
GO:1900117	GO:1900117	regulation of execution phase of apoptosis	1/74	29/18723	0.108573	0.187142	0.121193	BCL2L1	1
GO:1902230	GO:1902230	negative regulation of intrinsic apoptotic signaling pathway in response to DNA damage	1/74	29/18723	0.108573	0.187142	0.121193	BCL2L1	1
GO:1902430	GO:1902430	negative regulation of amyloid-beta formation	1/74	29/18723	0.108573	0.187142	0.121193	PRNP	1
GO:1903318	GO:1903318	negative regulation of protein maturation	1/74	29/18723	0.108573	0.187142	0.121193	PRNP	1
GO:2000406	GO:2000406	positive regulation of T cell migration	1/74	29/18723	0.108573	0.187142	0.121193	XCL1	1
GO:0034763	GO:0034763	negative regulation of transmembrane transport	2/74	143/18723	0.109755	0.189041	0.122423	TNF/FABP5	2
GO:0009410	GO:0009410	response to xenobiotic stimulus	4/74	462/18723	0.110116	0.189523	0.122735	LTA/HSP90AB1/MYC/PRNP	4
GO:0010948	GO:0010948	negative regulation of cell cycle process	3/74	294/18723	0.110608	0.190004	0.123047	PLK3/RGCC/ZFP36L1	3
GO:0051604	GO:0051604	protein maturation	3/74	294/18723	0.110608	0.190004	0.123047	SRGN/VSIR/PRNP	3
GO:0014065	GO:0014065	phosphatidylinositol 3-kinase signaling	2/74	144/18723	0.111028	0.190004	0.123047	TNF/ZFP36L1	2
GO:0046879	GO:0046879	hormone secretion	3/74	295/18723	0.111443	0.190004	0.123047	TNF/PIM3/IFNG	3
GO:0003299	GO:0003299	muscle hypertrophy in response to stress	1/74	30/18723	0.112102	0.190004	0.123047	LMNA	1
GO:0014887	GO:0014887	cardiac muscle adaptation	1/74	30/18723	0.112102	0.190004	0.123047	LMNA	1
GO:0014898	GO:0014898	cardiac muscle hypertrophy in response to stress	1/74	30/18723	0.112102	0.190004	0.123047	LMNA	1
GO:0031571	GO:0031571	mitotic G1 DNA damage checkpoint signaling	1/74	30/18723	0.112102	0.190004	0.123047	PLK3	1
GO:0032480	GO:0032480	negative regulation of type I interferon production	1/74	30/18723	0.112102	0.190004	0.123047	REL	1
GO:0034390	GO:0034390	smooth muscle cell apoptotic process	1/74	30/18723	0.112102	0.190004	0.123047	IFNG	1
GO:0034391	GO:0034391	regulation of smooth muscle cell apoptotic process	1/74	30/18723	0.112102	0.190004	0.123047	IFNG	1
GO:0043032	GO:0043032	positive regulation of macrophage activation	1/74	30/18723	0.112102	0.190004	0.123047	IL13	1
GO:0044030	GO:0044030	regulation of DNA methylation	1/74	30/18723	0.112102	0.190004	0.123047	MYC	1
GO:0045939	GO:0045939	negative regulation of steroid metabolic process	1/74	30/18723	0.112102	0.190004	0.123047	INSIG1	1
GO:0045948	GO:0045948	positive regulation of translational initiation	1/74	30/18723	0.112102	0.190004	0.123047	TNF	1
GO:0050858	GO:0050858	negative regulation of antigen receptor-mediated signaling pathway	1/74	30/18723	0.112102	0.190004	0.123047	PRNP	1
GO:0070168	GO:0070168	negative regulation of biomineral tissue development	1/74	30/18723	0.112102	0.190004	0.123047	SRGN	1
GO:0070229	GO:0070229	negative regulation of lymphocyte apoptotic process	1/74	30/18723	0.112102	0.190004	0.123047	IL2	1
GO:0090151	GO:0090151	establishment of protein localization to mitochondrial membrane	1/74	30/18723	0.112102	0.190004	0.123047	GZMB	1
GO:0090314	GO:0090314	positive regulation of protein targeting to membrane	1/74	30/18723	0.112102	0.190004	0.123047	PRNP	1
GO:1900101	GO:1900101	regulation of endoplasmic reticulum unfolded protein response	1/74	30/18723	0.112102	0.190004	0.123047	BCL2L11	1
GO:0043524	GO:0043524	negative regulation of neuron apoptotic process	2/74	145/18723	0.112304	0.190209	0.12318	HSP90AB1/BCL2L1	2
GO:0042542	GO:0042542	response to hydrogen peroxide	2/74	146/18723	0.113584	0.192238	0.124494	NR4A3/KDM6B	2
GO:0031647	GO:0031647	regulation of protein stability	3/74	298/18723	0.11396	0.192736	0.124816	LMNA/HSP90AB1/PRNP	3
GO:1902652	GO:1902652	secondary alcohol metabolic process	2/74	147/18723	0.114868	0.193082	0.12504	IL4/INSIG1	2
GO:0051051	GO:0051051	negative regulation of transport	4/74	470/18723	0.115312	0.193082	0.12504	TNF/INSIG1/FABP5/PIM3	4
GO:0001516	GO:0001516	prostaglandin biosynthetic process	1/74	31/18723	0.115617	0.193082	0.12504	FABP5	1
GO:0001782	GO:0001782	B cell homeostasis	1/74	31/18723	0.115617	0.193082	0.12504	BCL2L11	1
GO:0002230	GO:0002230	positive regulation of defense response to virus by host	1/74	31/18723	0.115617	0.193082	0.12504	IL4	1
GO:0016577	GO:0016577	histone demethylation	1/74	31/18723	0.115617	0.193082	0.12504	KDM6B	1
GO:0021988	GO:0021988	olfactory lobe development	1/74	31/18723	0.115617	0.193082	0.12504	ID2	1
GO:0036474	GO:0036474	cell death in response to hydrogen peroxide	1/74	31/18723	0.115617	0.193082	0.12504	NR4A3	1
GO:0036475	GO:0036475	neuron death in response to oxidative stress	1/74	31/18723	0.115617	0.193082	0.12504	NR4A3	1
GO:0044819	GO:0044819	mitotic G1/S transition checkpoint signaling	1/74	31/18723	0.115617	0.193082	0.12504	PLK3	1
GO:0046457	GO:0046457	prostanoid biosynthetic process	1/74	31/18723	0.115617	0.193082	0.12504	FABP5	1
GO:0048710	GO:0048710	regulation of astrocyte differentiation	1/74	31/18723	0.115617	0.193082	0.12504	ID2	1
GO:0060055	GO:0060055	angiogenesis involved in wound healing	1/74	31/18723	0.115617	0.193082	0.12504	TNF	1
GO:0070633	GO:0070633	transepithelial transport	1/74	31/18723	0.115617	0.193082	0.12504	CSF2	1
GO:0071480	GO:0071480	cellular response to gamma radiation	1/74	31/18723	0.115617	0.193082	0.12504	BCL2L1	1
GO:0090183	GO:0090183	regulation of kidney development	1/74	31/18723	0.115617	0.193082	0.12504	MYC	1
GO:0110150	GO:0110150	negative regulation of biomineralization	1/74	31/18723	0.115617	0.193082	0.12504	SRGN	1
GO:0016050	GO:0016050	vesicle organization	3/74	300/18723	0.115651	0.193082	0.12504	INSIG1/SRGN/SDC4	3
GO:0035148	GO:0035148	tube formation	2/74	148/18723	0.116156	0.193787	0.125496	BCL2L11/SDC4	2
GO:0030198	GO:0030198	extracellular matrix organization	3/74	301/18723	0.1165	0.194084	0.125689	CFLAR/TNF/RGCC	3
GO:0042886	GO:0042886	amide transport	3/74	301/18723	0.1165	0.194084	0.125689	TNF/PIM3/IFNG	3
GO:0043062	GO:0043062	extracellular structure organization	3/74	302/18723	0.117351	0.195363	0.126517	CFLAR/TNF/RGCC	3
GO:0016525	GO:0016525	negative regulation of angiogenesis	2/74	149/18723	0.117448	0.195384	0.126531	TNF/RGCC	2
GO:0045229	GO:0045229	external encapsulating structure organization	3/74	304/18723	0.119061	0.195795	0.126797	CFLAR/TNF/RGCC	3
GO:0090287	GO:0090287	regulation of cellular response to growth factor stimulus	3/74	304/18723	0.119061	0.195795	0.126797	CFLAR/IL4/HSP90AB1	3
GO:0007435	GO:0007435	salivary gland morphogenesis	1/74	32/18723	0.119118	0.195795	0.126797	TNF	1
GO:0010667	GO:0010667	negative regulation of cardiac muscle cell apoptotic process	1/74	32/18723	0.119118	0.195795	0.126797	CFLAR	1
GO:0030431	GO:0030431	sleep	1/74	32/18723	0.119118	0.195795	0.126797	CSF2	1
GO:0030511	GO:0030511	positive regulation of transforming growth factor beta receptor signaling pathway	1/74	32/18723	0.119118	0.195795	0.126797	HSP90AB1	1
GO:0042044	GO:0042044	fluid transport	1/74	32/18723	0.119118	0.195795	0.126797	CSF2	1
GO:0042744	GO:0042744	hydrogen peroxide catabolic process	1/74	32/18723	0.119118	0.195795	0.126797	PRDX1	1
GO:0045684	GO:0045684	positive regulation of epidermis development	1/74	32/18723	0.119118	0.195795	0.126797	ZBED2	1
GO:0050685	GO:0050685	positive regulation of mRNA processing	1/74	32/18723	0.119118	0.195795	0.126797	NCL	1
GO:0072525	GO:0072525	pyridine-containing compound biosynthetic process	1/74	32/18723	0.119118	0.195795	0.126797	NAMPT	1
GO:0090022	GO:0090022	regulation of neutrophil chemotaxis	1/74	32/18723	0.119118	0.195795	0.126797	XCL1	1
GO:0097345	GO:0097345	mitochondrial outer membrane permeabilization	1/74	32/18723	0.119118	0.195795	0.126797	GZMB	1
GO:1900745	GO:1900745	positive regulation of p38MAPK cascade	1/74	32/18723	0.119118	0.195795	0.126797	GADD45B	1
GO:1901889	GO:1901889	negative regulation of cell junction assembly	1/74	32/18723	0.119118	0.195795	0.126797	TNF	1
GO:1903846	GO:1903846	positive regulation of cellular response to transforming growth factor beta stimulus	1/74	32/18723	0.119118	0.195795	0.126797	HSP90AB1	1
GO:1905476	GO:1905476	negative regulation of protein localization to membrane	1/74	32/18723	0.119118	0.195795	0.126797	BCL2L1	1
GO:0006310	GO:0006310	DNA recombination	3/74	305/18723	0.119919	0.196899	0.127512	IL2/IL4/CD40LG	3
GO:0048754	GO:0048754	branching morphogenesis of an epithelial tube	2/74	151/18723	0.120042	0.196899	0.127512	TNF/MYC	2
GO:2000181	GO:2000181	negative regulation of blood vessel morphogenesis	2/74	151/18723	0.120042	0.196899	0.127512	TNF/RGCC	2
GO:0016125	GO:0016125	sterol metabolic process	2/74	152/18723	0.121344	0.198459	0.128522	IL4/INSIG1	2
GO:0021915	GO:0021915	neural tube development	2/74	152/18723	0.121344	0.198459	0.128522	ZFP36L1/SDC4	2
GO:1901343	GO:1901343	negative regulation of vasculature development	2/74	152/18723	0.121344	0.198459	0.128522	TNF/RGCC	2
GO:0002335	GO:0002335	mature B cell differentiation	1/74	33/18723	0.122605	0.198459	0.128522	IL2	1
GO:0002431	GO:0002431	Fc receptor mediated stimulatory signaling pathway	1/74	33/18723	0.122605	0.198459	0.128522	NR4A3	1
GO:0003382	GO:0003382	epithelial cell morphogenesis	1/74	33/18723	0.122605	0.198459	0.128522	RILPL2	1
GO:0006482	GO:0006482	protein demethylation	1/74	33/18723	0.122605	0.198459	0.128522	KDM6B	1
GO:0008214	GO:0008214	protein dealkylation	1/74	33/18723	0.122605	0.198459	0.128522	KDM6B	1
GO:0009648	GO:0009648	photoperiodism	1/74	33/18723	0.122605	0.198459	0.128522	ID2	1
GO:0019362	GO:0019362	pyridine nucleotide metabolic process	1/74	33/18723	0.122605	0.198459	0.128522	NAMPT	1
GO:0042558	GO:0042558	pteridine-containing compound metabolic process	1/74	33/18723	0.122605	0.198459	0.128522	MTHFD2	1
GO:0046320	GO:0046320	regulation of fatty acid oxidation	1/74	33/18723	0.122605	0.198459	0.128522	NR4A3	1
GO:0046496	GO:0046496	nicotinamide nucleotide metabolic process	1/74	33/18723	0.122605	0.198459	0.128522	NAMPT	1
GO:0048333	GO:0048333	mesodermal cell differentiation	1/74	33/18723	0.122605	0.198459	0.128522	KDM6B	1
GO:0050901	GO:0050901	leukocyte tethering or rolling	1/74	33/18723	0.122605	0.198459	0.128522	TNF	1
GO:0060122	GO:0060122	inner ear receptor cell stereocilium organization	1/74	33/18723	0.122605	0.198459	0.128522	SDC4	1
GO:0150117	GO:0150117	positive regulation of cell-substrate junction organization	1/74	33/18723	0.122605	0.198459	0.128522	SDC4	1
GO:1902992	GO:1902992	negative regulation of amyloid precursor protein catabolic process	1/74	33/18723	0.122605	0.198459	0.128522	PRNP	1
GO:2000036	GO:2000036	regulation of stem cell population maintenance	1/74	33/18723	0.122605	0.198459	0.128522	MYC	1
GO:1903364	GO:1903364	positive regulation of cellular protein catabolic process	2/74	155/18723	0.125273	0.201709	0.130627	PLK3/RNF19A	2
GO:0019932	GO:0019932	second-messenger-mediated signaling	3/74	312/18723	0.125992	0.201709	0.130627	TNF/PRNP/CCL4	3
GO:0070588	GO:0070588	calcium ion transmembrane transport	3/74	312/18723	0.125992	0.201709	0.130627	XCL1/IL13/PRNP	3
GO:0006356	GO:0006356	regulation of transcription by RNA polymerase I	1/74	34/18723	0.126079	0.201709	0.130627	NCL	1
GO:0007431	GO:0007431	salivary gland development	1/74	34/18723	0.126079	0.201709	0.130627	TNF	1
GO:0007616	GO:0007616	long-term memory	1/74	34/18723	0.126079	0.201709	0.130627	PRNP	1
GO:0009303	GO:0009303	rRNA transcription	1/74	34/18723	0.126079	0.201709	0.130627	NCL	1
GO:0009649	GO:0009649	entrainment of circadian clock	1/74	34/18723	0.126079	0.201709	0.130627	ID2	1
GO:0010614	GO:0010614	negative regulation of cardiac muscle hypertrophy	1/74	34/18723	0.126079	0.201709	0.130627	LMNA	1
GO:0010661	GO:0010661	positive regulation of muscle cell apoptotic process	1/74	34/18723	0.126079	0.201709	0.130627	IFNG	1
GO:0030851	GO:0030851	granulocyte differentiation	1/74	34/18723	0.126079	0.201709	0.130627	CSF2	1
GO:0032743	GO:0032743	positive regulation of interleukin-2 production	1/74	34/18723	0.126079	0.201709	0.130627	IRF4	1
GO:0035308	GO:0035308	negative regulation of protein dephosphorylation	1/74	34/18723	0.126079	0.201709	0.130627	TNF	1
GO:0039528	GO:0039528	cytoplasmic pattern recognition receptor signaling pathway in response to virus	1/74	34/18723	0.126079	0.201709	0.130627	BIRC3	1
GO:0048536	GO:0048536	spleen development	1/74	34/18723	0.126079	0.201709	0.130627	BCL2L11	1
GO:0050869	GO:0050869	negative regulation of B cell activation	1/74	34/18723	0.126079	0.201709	0.130627	ID2	1
GO:0051085	GO:0051085	chaperone cofactor-dependent protein refolding	1/74	34/18723	0.126079	0.201709	0.130627	HSPH1	1
GO:0035051	GO:0035051	cardiocyte differentiation	2/74	156/18723	0.126589	0.202387	0.131066	LMNA/KDM6B	2
GO:0001837	GO:0001837	epithelial to mesenchymal transition	2/74	157/18723	0.127909	0.204078	0.132161	NOLC1/RGCC	2
GO:0051017	GO:0051017	actin filament bundle assembly	2/74	157/18723	0.127909	0.204078	0.132161	RGCC/SDC4	2
GO:2000377	GO:2000377	regulation of reactive oxygen species metabolic process	2/74	157/18723	0.127909	0.204078	0.132161	CFLAR/TNF	2
GO:0002768	GO:0002768	immune response-regulating cell surface receptor signaling pathway	3/74	315/18723	0.128629	0.204725	0.13258	NR4A3/PRNP/NFKBID	3
GO:0018105	GO:0018105	peptidyl-serine phosphorylation	3/74	315/18723	0.128629	0.204725	0.13258	TNF/HSP90AB1/IFNG	3
GO:0006091	GO:0006091	generation of precursor metabolites and energy	4/74	490/18723	0.128768	0.204725	0.13258	IL4/MYC/NR4A3/IFNG	4
GO:0034765	GO:0034765	regulation of ion transmembrane transport	4/74	491/18723	0.129458	0.204725	0.13258	XCL1/IL13/PRNP/IFNG	4
GO:0006471	GO:0006471	protein ADP-ribosylation	1/74	35/18723	0.129539	0.204725	0.13258	IFNG	1
GO:0010664	GO:0010664	negative regulation of striated muscle cell apoptotic process	1/74	35/18723	0.129539	0.204725	0.13258	CFLAR	1
GO:0010837	GO:0010837	regulation of keratinocyte proliferation	1/74	35/18723	0.129539	0.204725	0.13258	ZFP36L1	1
GO:0021955	GO:0021955	central nervous system neuron axonogenesis	1/74	35/18723	0.129539	0.204725	0.13258	HSP90AB1	1
GO:0032435	GO:0032435	negative regulation of proteasomal ubiquitin-dependent protein catabolic process	1/74	35/18723	0.129539	0.204725	0.13258	HSP90AB1	1
GO:0034405	GO:0034405	response to fluid shear stress	1/74	35/18723	0.129539	0.204725	0.13258	CSF2	1
GO:0043243	GO:0043243	positive regulation of protein-containing complex disassembly	1/74	35/18723	0.129539	0.204725	0.13258	TNF	1
GO:0045454	GO:0045454	cell redox homeostasis	1/74	35/18723	0.129539	0.204725	0.13258	PRDX1	1
GO:0045922	GO:0045922	negative regulation of fatty acid metabolic process	1/74	35/18723	0.129539	0.204725	0.13258	INSIG1	1
GO:1905898	GO:1905898	positive regulation of response to endoplasmic reticulum stress	1/74	35/18723	0.129539	0.204725	0.13258	BCL2L11	1
GO:0019058	GO:0019058	viral life cycle	3/74	317/18723	0.130398	0.205943	0.133369	TNFRSF4/TNF/HSP90AB1	3
GO:0032200	GO:0032200	telomere organization	2/74	159/18723	0.130558	0.206056	0.133442	HSP90AB1/MYC	2
GO:0010762	GO:0010762	regulation of fibroblast migration	1/74	36/18723	0.132986	0.208052	0.134735	SDC4	1
GO:0010923	GO:0010923	negative regulation of phosphatase activity	1/74	36/18723	0.132986	0.208052	0.134735	TNF	1
GO:0014741	GO:0014741	negative regulation of muscle hypertrophy	1/74	36/18723	0.132986	0.208052	0.134735	LMNA	1
GO:0036314	GO:0036314	response to sterol	1/74	36/18723	0.132986	0.208052	0.134735	INSIG1	1
GO:0044743	GO:0044743	protein transmembrane import into intracellular organelle	1/74	36/18723	0.132986	0.208052	0.134735	TOMM40	1
GO:0045746	GO:0045746	negative regulation of Notch signaling pathway	1/74	36/18723	0.132986	0.208052	0.134735	NFKBIA	1
GO:0051354	GO:0051354	negative regulation of oxidoreductase activity	1/74	36/18723	0.132986	0.208052	0.134735	IL13	1
GO:0060338	GO:0060338	regulation of type I interferon-mediated signaling pathway	1/74	36/18723	0.132986	0.208052	0.134735	HSP90AB1	1
GO:0090313	GO:0090313	regulation of protein targeting to membrane	1/74	36/18723	0.132986	0.208052	0.134735	PRNP	1
GO:0097009	GO:0097009	energy homeostasis	1/74	36/18723	0.132986	0.208052	0.134735	NR4A3	1
GO:1902229	GO:1902229	regulation of intrinsic apoptotic signaling pathway in response to DNA damage	1/74	36/18723	0.132986	0.208052	0.134735	BCL2L1	1
GO:1903749	GO:1903749	positive regulation of establishment of protein localization to mitochondrion	1/74	36/18723	0.132986	0.208052	0.134735	GZMB	1
GO:0009895	GO:0009895	negative regulation of catabolic process	3/74	320/18723	0.133068	0.208052	0.134735	TNF/HSP90AB1/NAMPT	3
GO:0071496	GO:0071496	cellular response to external stimulus	3/74	320/18723	0.133068	0.208052	0.134735	IL13/NAMPT/TNFSF14	3
GO:0061572	GO:0061572	actin filament bundle organization	2/74	161/18723	0.13322	0.208151	0.134799	RGCC/SDC4	2
GO:0034250	GO:0034250	positive regulation of cellular amide metabolic process	2/74	162/18723	0.134556	0.210098	0.13606	TNF/IFNG	2
GO:0006633	GO:0006633	fatty acid biosynthetic process	2/74	163/18723	0.135895	0.211595	0.137029	INSIG1/FABP5	2
GO:0071322	GO:0071322	cellular response to carbohydrate stimulus	2/74	163/18723	0.135895	0.211595	0.137029	ZFP36L1/PIM3	2
GO:0003161	GO:0003161	cardiac conduction system development	1/74	37/18723	0.13642	0.211595	0.137029	ID2	1
GO:0033120	GO:0033120	positive regulation of RNA splicing	1/74	37/18723	0.13642	0.211595	0.137029	NCL	1
GO:0033363	GO:0033363	secretory granule organization	1/74	37/18723	0.13642	0.211595	0.137029	SRGN	1
GO:0042401	GO:0042401	cellular biogenic amine biosynthetic process	1/74	37/18723	0.13642	0.211595	0.137029	ODC1	1
GO:0043368	GO:0043368	positive T cell selection	1/74	37/18723	0.13642	0.211595	0.137029	IRF4	1
GO:0043403	GO:0043403	skeletal muscle tissue regeneration	1/74	37/18723	0.13642	0.211595	0.137029	CFLAR	1
GO:0051567	GO:0051567	histone H3-K9 methylation	1/74	37/18723	0.13642	0.211595	0.137029	LMNA	1
GO:0060428	GO:0060428	lung epithelium development	1/74	37/18723	0.13642	0.211595	0.137029	IL13	1
GO:0050680	GO:0050680	negative regulation of epithelial cell proliferation	2/74	164/18723	0.137237	0.21244	0.137577	TNF/RGCC	2
GO:0050806	GO:0050806	positive regulation of synaptic transmission	2/74	164/18723	0.137237	0.21244	0.137577	TNF/PRNP	2
GO:2001242	GO:2001242	regulation of intrinsic apoptotic signaling pathway	2/74	164/18723	0.137237	0.21244	0.137577	BCL2L11/BCL2L1	2
GO:0060562	GO:0060562	epithelial tube morphogenesis	3/74	325/18723	0.13756	0.2128	0.137809	TNF/MYC/SDC4	3
GO:0032635	GO:0032635	interleukin-6 production	2/74	165/18723	0.138582	0.213956	0.138558	TNF/IFNG	2
GO:0032675	GO:0032675	regulation of interleukin-6 production	2/74	165/18723	0.138582	0.213956	0.138558	TNF/IFNG	2
GO:0046661	GO:0046661	male sex differentiation	2/74	165/18723	0.138582	0.213956	0.138558	BCL2L11/BCL2L1	2
GO:0009309	GO:0009309	amine biosynthetic process	1/74	38/18723	0.13984	0.214623	0.13899	ODC1	1
GO:0010613	GO:0010613	positive regulation of cardiac muscle hypertrophy	1/74	38/18723	0.13984	0.214623	0.13899	NR4A3	1
GO:0030279	GO:0030279	negative regulation of ossification	1/74	38/18723	0.13984	0.214623	0.13899	SRGN	1
GO:0032373	GO:0032373	positive regulation of sterol transport	1/74	38/18723	0.13984	0.214623	0.13899	NFKBIA	1
GO:0032376	GO:0032376	positive regulation of cholesterol transport	1/74	38/18723	0.13984	0.214623	0.13899	NFKBIA	1
GO:0046676	GO:0046676	negative regulation of insulin secretion	1/74	38/18723	0.13984	0.214623	0.13899	PIM3	1
GO:0051930	GO:0051930	regulation of sensory perception of pain	1/74	38/18723	0.13984	0.214623	0.13899	FABP5	1
GO:0072524	GO:0072524	pyridine-containing compound metabolic process	1/74	38/18723	0.13984	0.214623	0.13899	NAMPT	1
GO:1901031	GO:1901031	regulation of response to reactive oxygen species	1/74	38/18723	0.13984	0.214623	0.13899	NR4A3	1
GO:0099173	GO:0099173	postsynapse organization	2/74	168/18723	0.142634	0.218703	0.141632	SRGN/PRNP	2
GO:0001914	GO:0001914	regulation of T cell mediated cytotoxicity	1/74	39/18723	0.143246	0.218703	0.141632	XCL1	1
GO:0014742	GO:0014742	positive regulation of muscle hypertrophy	1/74	39/18723	0.143246	0.218703	0.141632	NR4A3	1
GO:0045923	GO:0045923	positive regulation of fatty acid metabolic process	1/74	39/18723	0.143246	0.218703	0.141632	NR4A3	1
GO:0051084	GO:0051084	'de novo' posttranslational protein folding	1/74	39/18723	0.143246	0.218703	0.141632	HSPH1	1
GO:0051931	GO:0051931	regulation of sensory perception	1/74	39/18723	0.143246	0.218703	0.141632	FABP5	1
GO:0071548	GO:0071548	response to dexamethasone	1/74	39/18723	0.143246	0.218703	0.141632	CFLAR	1
GO:1902742	GO:1902742	apoptotic process involved in development	1/74	39/18723	0.143246	0.218703	0.141632	BCL2L11	1
GO:0021543	GO:0021543	pallium development	2/74	169/18723	0.143991	0.219696	0.142275	BCL2A1/KDM6B	2
GO:0030866	GO:0030866	cortical actin cytoskeleton organization	1/74	40/18723	0.146639	0.22301	0.144421	TNF	1
GO:0034122	GO:0034122	negative regulation of toll-like receptor signaling pathway	1/74	40/18723	0.146639	0.22301	0.144421	IRF4	1
GO:0035329	GO:0035329	hippo signaling	1/74	40/18723	0.146639	0.22301	0.144421	MAP2K3	1
GO:0045777	GO:0045777	positive regulation of blood pressure	1/74	40/18723	0.146639	0.22301	0.144421	ID2	1
GO:1904994	GO:1904994	regulation of leukocyte adhesion to vascular endothelial cell	1/74	40/18723	0.146639	0.22301	0.144421	TNF	1
GO:0007219	GO:0007219	Notch signaling pathway	2/74	172/18723	0.148077	0.22505	0.145742	IL2RA/NFKBIA	2
GO:0000910	GO:0000910	cytokinesis	2/74	173/18723	0.149444	0.226677	0.146796	PLK3/BCL2L1	2
GO:0010469	GO:0010469	regulation of signaling receptor activity	2/74	173/18723	0.149444	0.226677	0.146796	TNF/IFNG	2
GO:0018209	GO:0018209	peptidyl-serine modification	3/74	338/18723	0.14948	0.226677	0.146796	TNF/HSP90AB1/IFNG	3
GO:0031062	GO:0031062	positive regulation of histone methylation	1/74	41/18723	0.150019	0.226677	0.146796	LMNA	1
GO:0050691	GO:0050691	regulation of defense response to virus by host	1/74	41/18723	0.150019	0.226677	0.146796	IL4	1
GO:0050856	GO:0050856	regulation of T cell receptor signaling pathway	1/74	41/18723	0.150019	0.226677	0.146796	PRNP	1
GO:0071470	GO:0071470	cellular response to osmotic stress	1/74	41/18723	0.150019	0.226677	0.146796	ZFP36L1	1
GO:1900371	GO:1900371	regulation of purine nucleotide biosynthetic process	1/74	41/18723	0.150019	0.226677	0.146796	IL4	1
GO:1902622	GO:1902622	regulation of neutrophil migration	1/74	41/18723	0.150019	0.226677	0.146796	XCL1	1
GO:0045765	GO:0045765	regulation of angiogenesis	3/74	342/18723	0.153214	0.22954	0.14865	TNF/NINJ1/RGCC	3
GO:0030574	GO:0030574	collagen catabolic process	1/74	42/18723	0.153386	0.22954	0.14865	VSIR	1
GO:0030808	GO:0030808	regulation of nucleotide biosynthetic process	1/74	42/18723	0.153386	0.22954	0.14865	IL4	1
GO:0032965	GO:0032965	regulation of collagen biosynthetic process	1/74	42/18723	0.153386	0.22954	0.14865	RGCC	1
GO:0033574	GO:0033574	response to testosterone	1/74	42/18723	0.153386	0.22954	0.14865	CFLAR	1
GO:0035019	GO:0035019	somatic stem cell population maintenance	1/74	42/18723	0.153386	0.22954	0.14865	MYC	1
GO:0043507	GO:0043507	positive regulation of JUN kinase activity	1/74	42/18723	0.153386	0.22954	0.14865	TNF	1
GO:0045687	GO:0045687	positive regulation of glial cell differentiation	1/74	42/18723	0.153386	0.22954	0.14865	ID2	1
GO:0046688	GO:0046688	response to copper ion	1/74	42/18723	0.153386	0.22954	0.14865	PRNP	1
GO:0060999	GO:0060999	positive regulation of dendritic spine development	1/74	42/18723	0.153386	0.22954	0.14865	IL2	1
GO:0071312	GO:0071312	cellular response to alkaloid	1/74	42/18723	0.153386	0.22954	0.14865	BCL2L1	1
GO:0072595	GO:0072595	maintenance of protein localization in organelle	1/74	42/18723	0.153386	0.22954	0.14865	INSIG1	1
GO:0090317	GO:0090317	negative regulation of intracellular protein transport	1/74	42/18723	0.153386	0.22954	0.14865	INSIG1	1
GO:1902895	GO:1902895	positive regulation of pri-miRNA transcription by RNA polymerase II	1/74	42/18723	0.153386	0.22954	0.14865	TNF	1
GO:2000404	GO:2000404	regulation of T cell migration	1/74	42/18723	0.153386	0.22954	0.14865	XCL1	1
GO:0010634	GO:0010634	positive regulation of epithelial cell migration	2/74	176/18723	0.153562	0.229655	0.148725	MAP2K3/IFNG	2
GO:0030324	GO:0030324	lung development	2/74	177/18723	0.154939	0.231419	0.149867	IL13/TNF	2
GO:0071466	GO:0071466	cellular response to xenobiotic stimulus	2/74	177/18723	0.154939	0.231419	0.149867	MYC/PRNP	2
GO:0030336	GO:0030336	negative regulation of cell migration	3/74	344/18723	0.155093	0.231501	0.14992	IL4/TNF/RGCC	3
GO:0009266	GO:0009266	response to temperature stimulus	2/74	178/18723	0.156319	0.233034	0.150913	HSP90AB1/NFKBIA	2
GO:0048015	GO:0048015	phosphatidylinositol-mediated signaling	2/74	178/18723	0.156319	0.233034	0.150913	TNF/ZFP36L1	2
GO:0006458	GO:0006458	'de novo' protein folding	1/74	43/18723	0.15674	0.233067	0.150934	HSPH1	1
GO:0042088	GO:0042088	T-helper 1 type immune response	1/74	43/18723	0.15674	0.233067	0.150934	XCL1	1
GO:0045840	GO:0045840	positive regulation of mitotic nuclear division	1/74	43/18723	0.15674	0.233067	0.150934	RGCC	1
GO:0090278	GO:0090278	negative regulation of peptide hormone secretion	1/74	43/18723	0.15674	0.233067	0.150934	PIM3	1
GO:0001936	GO:0001936	regulation of endothelial cell proliferation	2/74	179/18723	0.157702	0.234348	0.151764	TNF/RGCC	2
GO:1901342	GO:1901342	regulation of vasculature development	3/74	348/18723	0.158872	0.235937	0.152793	TNF/NINJ1/RGCC	3
GO:0002792	GO:0002792	negative regulation of peptide secretion	1/74	44/18723	0.16008	0.236531	0.153177	PIM3	1
GO:0042269	GO:0042269	regulation of natural killer cell mediated cytotoxicity	1/74	44/18723	0.16008	0.236531	0.153177	SERPINB9	1
GO:0048066	GO:0048066	developmental pigmentation	1/74	44/18723	0.16008	0.236531	0.153177	BCL2L11	1
GO:0050999	GO:0050999	regulation of nitric-oxide synthase activity	1/74	44/18723	0.16008	0.236531	0.153177	TNF	1
GO:0060711	GO:0060711	labyrinthine layer development	1/74	44/18723	0.16008	0.236531	0.153177	ZFP36L1	1
GO:0062208	GO:0062208	positive regulation of pattern recognition receptor signaling pathway	1/74	44/18723	0.16008	0.236531	0.153177	NINJ1	1
GO:0089718	GO:0089718	amino acid import across plasma membrane	1/74	44/18723	0.16008	0.236531	0.153177	SLC7A5	1
GO:1903573	GO:1903573	negative regulation of response to endoplasmic reticulum stress	1/74	44/18723	0.16008	0.236531	0.153177	BCL2L1	1
GO:1905952	GO:1905952	regulation of lipid localization	2/74	181/18723	0.160474	0.236962	0.153457	TNF/NFKBIA	2
GO:0042742	GO:0042742	defense response to bacterium	3/74	350/18723	0.160772	0.237253	0.153645	LTA/TNF/TNFSF8	3
GO:0048017	GO:0048017	inositol lipid-mediated signaling	2/74	182/18723	0.161863	0.238411	0.154395	TNF/ZFP36L1	2
GO:0051260	GO:0051260	protein homooligomerization	2/74	182/18723	0.161863	0.238411	0.154395	NINJ1/PRNP	2
GO:0061138	GO:0061138	morphogenesis of a branching epithelium	2/74	182/18723	0.161863	0.238411	0.154395	TNF/MYC	2
GO:0006110	GO:0006110	regulation of glycolytic process	1/74	45/18723	0.163408	0.239331	0.154991	IFNG	1
GO:0035272	GO:0035272	exocrine system development	1/74	45/18723	0.163408	0.239331	0.154991	TNF	1
GO:0035305	GO:0035305	negative regulation of dephosphorylation	1/74	45/18723	0.163408	0.239331	0.154991	TNF	1
GO:0035307	GO:0035307	positive regulation of protein dephosphorylation	1/74	45/18723	0.163408	0.239331	0.154991	HSP90AB1	1
GO:0048538	GO:0048538	thymus development	1/74	45/18723	0.163408	0.239331	0.154991	BCL2L11	1
GO:0048546	GO:0048546	digestive tract morphogenesis	1/74	45/18723	0.163408	0.239331	0.154991	ID2	1
GO:0060119	GO:0060119	inner ear receptor cell development	1/74	45/18723	0.163408	0.239331	0.154991	SDC4	1
GO:0085029	GO:0085029	extracellular matrix assembly	1/74	45/18723	0.163408	0.239331	0.154991	RGCC	1
GO:2000273	GO:2000273	positive regulation of signaling receptor activity	1/74	45/18723	0.163408	0.239331	0.154991	IFNG	1
GO:0055001	GO:0055001	muscle cell development	2/74	184/18723	0.164648	0.240997	0.156069	LMNA/CFLAR	2
GO:0051896	GO:0051896	regulation of protein kinase B signaling	2/74	185/18723	0.166044	0.242817	0.157248	TNF/HSP90AB1	2
GO:0010828	GO:0010828	positive regulation of glucose transmembrane transport	1/74	46/18723	0.166722	0.242817	0.157248	NR4A3	1
GO:0031648	GO:0031648	protein destabilization	1/74	46/18723	0.166722	0.242817	0.157248	PRNP	1
GO:0043616	GO:0043616	keratinocyte proliferation	1/74	46/18723	0.166722	0.242817	0.157248	ZFP36L1	1
GO:0061028	GO:0061028	establishment of endothelial barrier	1/74	46/18723	0.166722	0.242817	0.157248	TNF	1
GO:1900087	GO:1900087	positive regulation of G1/S transition of mitotic cell cycle	1/74	46/18723	0.166722	0.242817	0.157248	RGCC	1
GO:1900271	GO:1900271	regulation of long-term synaptic potentiation	1/74	46/18723	0.166722	0.242817	0.157248	PRNP	1
GO:2000107	GO:2000107	negative regulation of leukocyte apoptotic process	1/74	46/18723	0.166722	0.242817	0.157248	IL2	1
GO:0008217	GO:0008217	regulation of blood pressure	2/74	186/18723	0.167443	0.243714	0.157829	ID2/NAMPT	2
GO:2000146	GO:2000146	negative regulation of cell motility	3/74	359/18723	0.169409	0.246093	0.15937	IL4/TNF/RGCC	3
GO:0006998	GO:0006998	nuclear envelope organization	1/74	47/18723	0.170024	0.246093	0.15937	LMNA	1
GO:0010761	GO:0010761	fibroblast migration	1/74	47/18723	0.170024	0.246093	0.15937	SDC4	1
GO:0014911	GO:0014911	positive regulation of smooth muscle cell migration	1/74	47/18723	0.170024	0.246093	0.15937	NR4A3	1
GO:0045601	GO:0045601	regulation of endothelial cell differentiation	1/74	47/18723	0.170024	0.246093	0.15937	TNF	1
GO:0045646	GO:0045646	regulation of erythrocyte differentiation	1/74	47/18723	0.170024	0.246093	0.15937	ZFP36L1	1
GO:0046677	GO:0046677	response to antibiotic	1/74	47/18723	0.170024	0.246093	0.15937	KDM6B	1
GO:0090279	GO:0090279	regulation of calcium ion import	1/74	47/18723	0.170024	0.246093	0.15937	PRNP	1
GO:1900744	GO:1900744	regulation of p38MAPK cascade	1/74	47/18723	0.170024	0.246093	0.15937	GADD45B	1
GO:0048839	GO:0048839	inner ear development	2/74	188/18723	0.170245	0.246261	0.159478	INSIG1/SDC4	2
GO:0002715	GO:0002715	regulation of natural killer cell mediated immunity	1/74	48/18723	0.173313	0.249463	0.161553	SERPINB9	1
GO:0015804	GO:0015804	neutral amino acid transport	1/74	48/18723	0.173313	0.249463	0.161553	SLC7A5	1
GO:0032527	GO:0032527	protein exit from endoplasmic reticulum	1/74	48/18723	0.173313	0.249463	0.161553	INSIG1	1
GO:0042908	GO:0042908	xenobiotic transport	1/74	48/18723	0.173313	0.249463	0.161553	SLC7A5	1
GO:0061647	GO:0061647	histone H3-K9 modification	1/74	48/18723	0.173313	0.249463	0.161553	LMNA	1
GO:0090311	GO:0090311	regulation of protein deacetylation	1/74	48/18723	0.173313	0.249463	0.161553	IFNG	1
GO:2000059	GO:2000059	negative regulation of ubiquitin-dependent protein catabolic process	1/74	48/18723	0.173313	0.249463	0.161553	HSP90AB1	1
GO:2001238	GO:2001238	positive regulation of extrinsic apoptotic signaling pathway	1/74	48/18723	0.173313	0.249463	0.161553	TNF	1
GO:0001913	GO:0001913	T cell mediated cytotoxicity	1/74	49/18723	0.176588	0.252778	0.163699	XCL1	1
GO:0006692	GO:0006692	prostanoid metabolic process	1/74	49/18723	0.176588	0.252778	0.163699	FABP5	1
GO:0006693	GO:0006693	prostaglandin metabolic process	1/74	49/18723	0.176588	0.252778	0.163699	FABP5	1
GO:0006953	GO:0006953	acute-phase response	1/74	49/18723	0.176588	0.252778	0.163699	TNF	1
GO:0009409	GO:0009409	response to cold	1/74	49/18723	0.176588	0.252778	0.163699	NFKBIA	1
GO:0060964	GO:0060964	regulation of gene silencing by miRNA	1/74	49/18723	0.176588	0.252778	0.163699	TNF	1
GO:0072091	GO:0072091	regulation of stem cell proliferation	1/74	49/18723	0.176588	0.252778	0.163699	ZFP36L1	1
GO:1901799	GO:1901799	negative regulation of proteasomal protein catabolic process	1/74	49/18723	0.176588	0.252778	0.163699	HSP90AB1	1
GO:1904752	GO:1904752	regulation of vascular associated smooth muscle cell migration	1/74	49/18723	0.176588	0.252778	0.163699	NR4A3	1
GO:0051271	GO:0051271	negative regulation of cellular component movement	3/74	367/18723	0.177199	0.253313	0.164045	IL4/TNF/RGCC	3
GO:0140694	GO:0140694	non-membrane-bounded organelle assembly	3/74	367/18723	0.177199	0.253313	0.164045	CFLAR/CSF2/TNF	3
GO:0001935	GO:0001935	endothelial cell proliferation	2/74	193/18723	0.177286	0.253313	0.164045	TNF/RGCC	2
GO:1901654	GO:1901654	response to ketone	2/74	194/18723	0.1787	0.255107	0.165208	CFLAR/BCL2L1	2
GO:0010665	GO:0010665	regulation of cardiac muscle cell apoptotic process	1/74	50/18723	0.179851	0.255107	0.165208	CFLAR	1
GO:0018023	GO:0018023	peptidyl-lysine trimethylation	1/74	50/18723	0.179851	0.255107	0.165208	LMNA	1
GO:0019083	GO:0019083	viral transcription	1/74	50/18723	0.179851	0.255107	0.165208	CCL4	1
GO:0038093	GO:0038093	Fc receptor signaling pathway	1/74	50/18723	0.179851	0.255107	0.165208	NR4A3	1
GO:0045058	GO:0045058	T cell selection	1/74	50/18723	0.179851	0.255107	0.165208	IRF4	1
GO:0060337	GO:0060337	type I interferon signaling pathway	1/74	50/18723	0.179851	0.255107	0.165208	HSP90AB1	1
GO:0060425	GO:0060425	lung morphogenesis	1/74	50/18723	0.179851	0.255107	0.165208	TNF	1
GO:0060688	GO:0060688	regulation of morphogenesis of a branching structure	1/74	50/18723	0.179851	0.255107	0.165208	TNF	1
GO:1903747	GO:1903747	regulation of establishment of protein localization to mitochondrion	1/74	50/18723	0.179851	0.255107	0.165208	GZMB	1
GO:1904738	GO:1904738	vascular associated smooth muscle cell migration	1/74	50/18723	0.179851	0.255107	0.165208	NR4A3	1
GO:2000677	GO:2000677	regulation of transcription regulatory region DNA binding	1/74	50/18723	0.179851	0.255107	0.165208	IFNG	1
GO:0001763	GO:0001763	morphogenesis of a branching structure	2/74	196/18723	0.181533	0.257182	0.166551	TNF/MYC	2
GO:0006006	GO:0006006	glucose metabolic process	2/74	196/18723	0.181533	0.257182	0.166551	TNF/FABP5	2
GO:0006636	GO:0006636	unsaturated fatty acid biosynthetic process	1/74	51/18723	0.183101	0.258152	0.167179	FABP5	1
GO:0010656	GO:0010656	negative regulation of muscle cell apoptotic process	1/74	51/18723	0.183101	0.258152	0.167179	CFLAR	1
GO:0010874	GO:0010874	regulation of cholesterol efflux	1/74	51/18723	0.183101	0.258152	0.167179	NFKBIA	1
GO:0032873	GO:0032873	negative regulation of stress-activated MAPK cascade	1/74	51/18723	0.183101	0.258152	0.167179	MYC	1
GO:0032964	GO:0032964	collagen biosynthetic process	1/74	51/18723	0.183101	0.258152	0.167179	RGCC	1
GO:0045668	GO:0045668	negative regulation of osteoblast differentiation	1/74	51/18723	0.183101	0.258152	0.167179	TNF	1
GO:0065002	GO:0065002	intracellular protein transmembrane transport	1/74	51/18723	0.183101	0.258152	0.167179	TOMM40	1
GO:0070303	GO:0070303	negative regulation of stress-activated protein kinase signaling cascade	1/74	51/18723	0.183101	0.258152	0.167179	MYC	1
GO:0010662	GO:0010662	regulation of striated muscle cell apoptotic process	1/74	52/18723	0.186339	0.260986	0.169015	CFLAR	1
GO:0010718	GO:0010718	positive regulation of epithelial to mesenchymal transition	1/74	52/18723	0.186339	0.260986	0.169015	RGCC	1
GO:0035196	GO:0035196	production of miRNAs involved in gene silencing by miRNA	1/74	52/18723	0.186339	0.260986	0.169015	TNF	1
GO:0043090	GO:0043090	amino acid import	1/74	52/18723	0.186339	0.260986	0.169015	SLC7A5	1
GO:0043392	GO:0043392	negative regulation of DNA binding	1/74	52/18723	0.186339	0.260986	0.169015	NFKBIA	1
GO:0048260	GO:0048260	positive regulation of receptor-mediated endocytosis	1/74	52/18723	0.186339	0.260986	0.169015	IL4	1
GO:0060147	GO:0060147	regulation of posttranscriptional gene silencing	1/74	52/18723	0.186339	0.260986	0.169015	TNF	1
GO:0071357	GO:0071357	cellular response to type I interferon	1/74	52/18723	0.186339	0.260986	0.169015	HSP90AB1	1
GO:0072132	GO:0072132	mesenchyme morphogenesis	1/74	52/18723	0.186339	0.260986	0.169015	MYC	1
GO:1903426	GO:1903426	regulation of reactive oxygen species biosynthetic process	1/74	52/18723	0.186339	0.260986	0.169015	CFLAR	1
GO:2000378	GO:2000378	negative regulation of reactive oxygen species metabolic process	1/74	52/18723	0.186339	0.260986	0.169015	CFLAR	1
GO:0030900	GO:0030900	forebrain development	3/74	379/18723	0.18907	0.264552	0.171324	ID2/BCL2A1/KDM6B	3
GO:0001541	GO:0001541	ovarian follicle development	1/74	53/18723	0.189564	0.264552	0.171324	BCL2L1	1
GO:0060966	GO:0060966	regulation of gene silencing by RNA	1/74	53/18723	0.189564	0.264552	0.171324	TNF	1
GO:0071320	GO:0071320	cellular response to cAMP	1/74	53/18723	0.189564	0.264552	0.171324	ZFP36L1	1
GO:1903202	GO:1903202	negative regulation of oxidative stress-induced cell death	1/74	53/18723	0.189564	0.264552	0.171324	NR4A3	1
GO:2000772	GO:2000772	regulation of cellular senescence	1/74	53/18723	0.189564	0.264552	0.171324	NAMPT	1
GO:0009913	GO:0009913	epidermal cell differentiation	2/74	202/18723	0.190073	0.265105	0.171682	ZBED2/ZFP36L1	2
GO:0060541	GO:0060541	respiratory system development	2/74	203/18723	0.191502	0.266939	0.17287	IL13/TNF	2
GO:0007215	GO:0007215	glutamate receptor signaling pathway	1/74	54/18723	0.192776	0.267757	0.1734	PRNP	1
GO:0010659	GO:0010659	cardiac muscle cell apoptotic process	1/74	54/18723	0.192776	0.267757	0.1734	CFLAR	1
GO:0031050	GO:0031050	dsRNA processing	1/74	54/18723	0.192776	0.267757	0.1734	TNF	1
GO:0070228	GO:0070228	regulation of lymphocyte apoptotic process	1/74	54/18723	0.192776	0.267757	0.1734	IL2	1
GO:0070918	GO:0070918	production of small RNA involved in gene silencing by RNA	1/74	54/18723	0.192776	0.267757	0.1734	TNF	1
GO:1902893	GO:1902893	regulation of pri-miRNA transcription by RNA polymerase II	1/74	54/18723	0.192776	0.267757	0.1734	TNF	1
GO:1901888	GO:1901888	regulation of cell junction assembly	2/74	204/18723	0.192933	0.267816	0.173438	TNF/SDC4	2
GO:0002067	GO:0002067	glandular epithelial cell differentiation	1/74	55/18723	0.195976	0.271075	0.175548	IL13	1
GO:0003229	GO:0003229	ventricular cardiac muscle tissue development	1/74	55/18723	0.195976	0.271075	0.175548	ID2	1
GO:0006360	GO:0006360	transcription by RNA polymerase I	1/74	55/18723	0.195976	0.271075	0.175548	NCL	1
GO:0042220	GO:0042220	response to cocaine	1/74	55/18723	0.195976	0.271075	0.175548	HSP90AB1	1
GO:0061098	GO:0061098	positive regulation of protein tyrosine kinase activity	1/74	55/18723	0.195976	0.271075	0.175548	PRNP	1
GO:0061614	GO:0061614	pri-miRNA transcription by RNA polymerase II	1/74	55/18723	0.195976	0.271075	0.175548	TNF	1
GO:0000288	GO:0000288	nuclear-transcribed mRNA catabolic process, deadenylation-dependent decay	1/74	56/18723	0.199163	0.273221	0.176938	ZFP36L1	1
GO:0001658	GO:0001658	branching involved in ureteric bud morphogenesis	1/74	56/18723	0.199163	0.273221	0.176938	MYC	1
GO:0001912	GO:0001912	positive regulation of leukocyte mediated cytotoxicity	1/74	56/18723	0.199163	0.273221	0.176938	XCL1	1
GO:0010658	GO:0010658	striated muscle cell apoptotic process	1/74	56/18723	0.199163	0.273221	0.176938	CFLAR	1
GO:0031122	GO:0031122	cytoplasmic microtubule organization	1/74	56/18723	0.199163	0.273221	0.176938	PLK3	1
GO:0032608	GO:0032608	interferon-beta production	1/74	56/18723	0.199163	0.273221	0.176938	REL	1
GO:0032648	GO:0032648	regulation of interferon-beta production	1/74	56/18723	0.199163	0.273221	0.176938	REL	1
GO:0042733	GO:0042733	embryonic digit morphogenesis	1/74	56/18723	0.199163	0.273221	0.176938	BCL2L11	1
GO:0043470	GO:0043470	regulation of carbohydrate catabolic process	1/74	56/18723	0.199163	0.273221	0.176938	IFNG	1
GO:0045071	GO:0045071	negative regulation of viral genome replication	1/74	56/18723	0.199163	0.273221	0.176938	TNF	1
GO:0046456	GO:0046456	icosanoid biosynthetic process	1/74	56/18723	0.199163	0.273221	0.176938	FABP5	1
GO:0048008	GO:0048008	platelet-derived growth factor receptor signaling pathway	1/74	56/18723	0.199163	0.273221	0.176938	NR4A3	1
GO:0070534	GO:0070534	protein K63-linked ubiquitination	1/74	56/18723	0.199163	0.273221	0.176938	TRAF1	1
GO:0098781	GO:0098781	ncRNA transcription	1/74	56/18723	0.199163	0.273221	0.176938	NCL	1
GO:1902905	GO:1902905	positive regulation of supramolecular fiber organization	2/74	209/18723	0.200106	0.274066	0.177485	RGCC/SDC4	2
GO:0006631	GO:0006631	fatty acid metabolic process	3/74	390/18723	0.20013	0.274066	0.177485	INSIG1/FABP5/NR4A3	3
GO:0051656	GO:0051656	establishment of organelle localization	3/74	390/18723	0.20013	0.274066	0.177485	IL13/IL4/NR4A3	3
GO:0040013	GO:0040013	negative regulation of locomotion	3/74	391/18723	0.201144	0.275293	0.17828	IL4/TNF/RGCC	3
GO:0031396	GO:0031396	regulation of protein ubiquitination	2/74	210/18723	0.201544	0.27568	0.17853	HSP90AB1/BIRC3	2
GO:0006695	GO:0006695	cholesterol biosynthetic process	1/74	57/18723	0.202338	0.275797	0.178606	INSIG1	1
GO:0006754	GO:0006754	ATP biosynthetic process	1/74	57/18723	0.202338	0.275797	0.178606	IL4	1
GO:0051205	GO:0051205	protein insertion into membrane	1/74	57/18723	0.202338	0.275797	0.178606	GZMB	1
GO:0051785	GO:0051785	positive regulation of nuclear division	1/74	57/18723	0.202338	0.275797	0.178606	RGCC	1
GO:0061756	GO:0061756	leukocyte adhesion to vascular endothelial cell	1/74	57/18723	0.202338	0.275797	0.178606	TNF	1
GO:1902653	GO:1902653	secondary alcohol biosynthetic process	1/74	57/18723	0.202338	0.275797	0.178606	INSIG1	1
GO:0006457	GO:0006457	protein folding	2/74	212/18723	0.204425	0.278318	0.180239	HSP90AB1/HSPH1	2
GO:0006469	GO:0006469	negative regulation of protein kinase activity	2/74	212/18723	0.204425	0.278318	0.180239	GADD45B/IFNG	2
GO:0001954	GO:0001954	positive regulation of cell-matrix adhesion	1/74	58/18723	0.2055	0.278484	0.180347	SDC4	1
GO:0006826	GO:0006826	iron ion transport	1/74	58/18723	0.2055	0.278484	0.180347	IFNG	1
GO:0032387	GO:0032387	negative regulation of intracellular transport	1/74	58/18723	0.2055	0.278484	0.180347	INSIG1	1
GO:0034340	GO:0034340	response to type I interferon	1/74	58/18723	0.2055	0.278484	0.180347	HSP90AB1	1
GO:0042743	GO:0042743	hydrogen peroxide metabolic process	1/74	58/18723	0.2055	0.278484	0.180347	PRDX1	1
GO:0043506	GO:0043506	regulation of JUN kinase activity	1/74	58/18723	0.2055	0.278484	0.180347	TNF	1
GO:1902808	GO:1902808	positive regulation of cell cycle G1/S phase transition	1/74	58/18723	0.2055	0.278484	0.180347	RGCC	1
GO:2001244	GO:2001244	positive regulation of intrinsic apoptotic signaling pathway	1/74	58/18723	0.2055	0.278484	0.180347	BCL2L11	1
GO:0072330	GO:0072330	monocarboxylic acid biosynthetic process	2/74	214/18723	0.207311	0.280776	0.181831	INSIG1/FABP5	2
GO:0006767	GO:0006767	water-soluble vitamin metabolic process	1/74	59/18723	0.20865	0.281936	0.182582	MTHFD2	1
GO:0046324	GO:0046324	regulation of glucose import	1/74	59/18723	0.20865	0.281936	0.182582	TNF	1
GO:0051055	GO:0051055	negative regulation of lipid biosynthetic process	1/74	59/18723	0.20865	0.281936	0.182582	INSIG1	1
GO:0071806	GO:0071806	protein transmembrane transport	1/74	59/18723	0.20865	0.281936	0.182582	TOMM40	1
GO:0031638	GO:0031638	zymogen activation	1/74	60/18723	0.211787	0.285681	0.185007	VSIR	1
GO:0051851	GO:0051851	modulation by host of symbiont process	1/74	60/18723	0.211787	0.285681	0.185007	CCL4	1
GO:0061951	GO:0061951	establishment of protein localization to plasma membrane	1/74	60/18723	0.211787	0.285681	0.185007	RILPL2	1
GO:0009746	GO:0009746	response to hexose	2/74	219/18723	0.214545	0.288731	0.186982	NAMPT/PIM3	2
GO:0006900	GO:0006900	vesicle budding from membrane	1/74	61/18723	0.214913	0.288731	0.186982	INSIG1	1
GO:0030865	GO:0030865	cortical cytoskeleton organization	1/74	61/18723	0.214913	0.288731	0.186982	TNF	1
GO:0043954	GO:0043954	cellular component maintenance	1/74	61/18723	0.214913	0.288731	0.186982	PRNP	1
GO:0043966	GO:0043966	histone H3 acetylation	1/74	61/18723	0.214913	0.288731	0.186982	IRF4	1
GO:0050994	GO:0050994	regulation of lipid catabolic process	1/74	61/18723	0.214913	0.288731	0.186982	TNF	1
GO:0060998	GO:0060998	regulation of dendritic spine development	1/74	61/18723	0.214913	0.288731	0.186982	IL2	1
GO:0002064	GO:0002064	epithelial cell development	2/74	220/18723	0.215995	0.290018	0.187816	TNF/RILPL2	2
GO:0008406	GO:0008406	gonad development	2/74	221/18723	0.217445	0.291407	0.188715	BCL2L11/BCL2L1	2
GO:0010573	GO:0010573	vascular endothelial growth factor production	1/74	62/18723	0.218026	0.291407	0.188715	TNF	1
GO:0031124	GO:0031124	mRNA 3'-end processing	1/74	62/18723	0.218026	0.291407	0.188715	ZFP36L1	1
GO:0032757	GO:0032757	positive regulation of interleukin-8 production	1/74	62/18723	0.218026	0.291407	0.188715	TNF	1
GO:0032835	GO:0032835	glomerulus development	1/74	62/18723	0.218026	0.291407	0.188715	CFLAR	1
GO:0048663	GO:0048663	neuron fate commitment	1/74	62/18723	0.218026	0.291407	0.188715	ID2	1
GO:0060113	GO:0060113	inner ear receptor cell differentiation	1/74	62/18723	0.218026	0.291407	0.188715	SDC4	1
GO:0060675	GO:0060675	ureteric bud morphogenesis	1/74	62/18723	0.218026	0.291407	0.188715	MYC	1
GO:0001503	GO:0001503	ossification	3/74	408/18723	0.218555	0.291948	0.189066	TNF/DDX21/SRGN	3
GO:0016239	GO:0016239	positive regulation of macroautophagy	1/74	63/18723	0.221127	0.294542	0.190745	IL4	1
GO:0030239	GO:0030239	myofibril assembly	1/74	63/18723	0.221127	0.294542	0.190745	CFLAR	1
GO:0050854	GO:0050854	regulation of antigen receptor-mediated signaling pathway	1/74	63/18723	0.221127	0.294542	0.190745	PRNP	1
GO:0072171	GO:0072171	mesonephric tubule morphogenesis	1/74	63/18723	0.221127	0.294542	0.190745	MYC	1
GO:0099601	GO:0099601	regulation of neurotransmitter receptor activity	1/74	63/18723	0.221127	0.294542	0.190745	IFNG	1
GO:0032984	GO:0032984	protein-containing complex disassembly	2/74	224/18723	0.221803	0.295275	0.19122	TNF/MYC	2
GO:0043161	GO:0043161	proteasome-mediated ubiquitin-dependent protein catabolic process	3/74	412/18723	0.222699	0.296299	0.191883	PLK3/HSP90AB1/RNF19A	3
GO:0006364	GO:0006364	rRNA processing	2/74	225/18723	0.223257	0.296704	0.192146	DDX21/NOLC1	2
GO:0034284	GO:0034284	response to monosaccharide	2/74	225/18723	0.223257	0.296704	0.192146	NAMPT/PIM3	2
GO:0001885	GO:0001885	endothelial cell development	1/74	64/18723	0.224215	0.296797	0.192206	TNF	1
GO:0016126	GO:0016126	sterol biosynthetic process	1/74	64/18723	0.224215	0.296797	0.192206	INSIG1	1
GO:0046888	GO:0046888	negative regulation of hormone secretion	1/74	64/18723	0.224215	0.296797	0.192206	PIM3	1
GO:0055002	GO:0055002	striated muscle cell development	1/74	64/18723	0.224215	0.296797	0.192206	CFLAR	1
GO:0061178	GO:0061178	regulation of insulin secretion involved in cellular response to glucose stimulus	1/74	64/18723	0.224215	0.296797	0.192206	PIM3	1
GO:1903051	GO:1903051	negative regulation of proteolysis involved in cellular protein catabolic process	1/74	64/18723	0.224215	0.296797	0.192206	HSP90AB1	1
GO:1903409	GO:1903409	reactive oxygen species biosynthetic process	1/74	64/18723	0.224215	0.296797	0.192206	CFLAR	1
GO:0051495	GO:0051495	positive regulation of cytoskeleton organization	2/74	226/18723	0.224713	0.297118	0.192414	RGCC/SDC4	2
GO:0071241	GO:0071241	cellular response to inorganic substance	2/74	226/18723	0.224713	0.297118	0.192414	CFLAR/PRNP	2
GO:0045137	GO:0045137	development of primary sexual characteristics	2/74	227/18723	0.226168	0.298875	0.193551	BCL2L11/BCL2L1	2
GO:0015909	GO:0015909	long-chain fatty acid transport	1/74	65/18723	0.227292	0.299682	0.194074	FABP5	1
GO:0070613	GO:0070613	regulation of protein processing	1/74	65/18723	0.227292	0.299682	0.194074	PRNP	1
GO:1902475	GO:1902475	L-alpha-amino acid transmembrane transport	1/74	65/18723	0.227292	0.299682	0.194074	SLC7A5	1
GO:1905330	GO:1905330	regulation of morphogenesis of an epithelium	1/74	65/18723	0.227292	0.299682	0.194074	TNF	1
GO:0001649	GO:0001649	osteoblast differentiation	2/74	229/18723	0.229082	0.301872	0.195493	TNF/DDX21	2
GO:0032715	GO:0032715	negative regulation of interleukin-6 production	1/74	66/18723	0.230357	0.302699	0.196028	TNF	1
GO:0051893	GO:0051893	regulation of focal adhesion assembly	1/74	66/18723	0.230357	0.302699	0.196028	SDC4	1
GO:0072678	GO:0072678	T cell migration	1/74	66/18723	0.230357	0.302699	0.196028	XCL1	1
GO:0090109	GO:0090109	regulation of cell-substrate junction assembly	1/74	66/18723	0.230357	0.302699	0.196028	SDC4	1
GO:2000272	GO:2000272	negative regulation of signaling receptor activity	1/74	66/18723	0.230357	0.302699	0.196028	TNF	1
GO:0042490	GO:0042490	mechanoreceptor differentiation	1/74	67/18723	0.233409	0.305851	0.198069	SDC4	1
GO:0043967	GO:0043967	histone H4 acetylation	1/74	67/18723	0.233409	0.305851	0.198069	IRF4	1
GO:0061077	GO:0061077	chaperone-mediated protein folding	1/74	67/18723	0.233409	0.305851	0.198069	HSPH1	1
GO:0061180	GO:0061180	mammary gland epithelium development	1/74	67/18723	0.233409	0.305851	0.198069	ID2	1
GO:1903317	GO:1903317	regulation of protein maturation	1/74	67/18723	0.233409	0.305851	0.198069	PRNP	1
GO:0007160	GO:0007160	cell-matrix adhesion	2/74	233/18723	0.234918	0.307656	0.199238	BCL2L11/SDC4	2
GO:0007585	GO:0007585	respiratory gaseous exchange by respiratory system	1/74	68/18723	0.23645	0.308798	0.199978	TRAF4	1
GO:0009206	GO:0009206	purine ribonucleoside triphosphate biosynthetic process	1/74	68/18723	0.23645	0.308798	0.199978	IL4	1
GO:0046686	GO:0046686	response to cadmium ion	1/74	68/18723	0.23645	0.308798	0.199978	PRNP	1
GO:0051148	GO:0051148	negative regulation of muscle cell differentiation	1/74	68/18723	0.23645	0.308798	0.199978	ID2	1
GO:1904888	GO:1904888	cranial skeletal system development	1/74	68/18723	0.23645	0.308798	0.199978	INSIG1	1
GO:0050808	GO:0050808	synapse organization	3/74	426/18723	0.237325	0.309768	0.200606	TNF/SRGN/PRNP	3
GO:0000209	GO:0000209	protein polyubiquitination	2/74	236/18723	0.239302	0.310672	0.201191	RNF19A/TRAF1	2
GO:0016072	GO:0016072	rRNA metabolic process	2/74	236/18723	0.239302	0.310672	0.201191	DDX21/NOLC1	2
GO:0048762	GO:0048762	mesenchymal cell differentiation	2/74	236/18723	0.239302	0.310672	0.201191	NOLC1/RGCC	2
GO:0007004	GO:0007004	telomere maintenance via telomerase	1/74	69/18723	0.239479	0.310672	0.201191	HSP90AB1	1
GO:0009145	GO:0009145	purine nucleoside triphosphate biosynthetic process	1/74	69/18723	0.239479	0.310672	0.201191	IL4	1
GO:0015807	GO:0015807	L-amino acid transport	1/74	69/18723	0.239479	0.310672	0.201191	SLC7A5	1
GO:0031060	GO:0031060	regulation of histone methylation	1/74	69/18723	0.239479	0.310672	0.201191	LMNA	1
GO:0033344	GO:0033344	cholesterol efflux	1/74	69/18723	0.239479	0.310672	0.201191	NFKBIA	1
GO:0034605	GO:0034605	cellular response to heat	1/74	69/18723	0.239479	0.310672	0.201191	HSP90AB1	1
GO:0050688	GO:0050688	regulation of defense response to virus	1/74	69/18723	0.239479	0.310672	0.201191	IL4	1
GO:0051966	GO:0051966	regulation of synaptic transmission, glutamatergic	1/74	69/18723	0.239479	0.310672	0.201191	TNF	1
GO:0019318	GO:0019318	hexose metabolic process	2/74	237/18723	0.240764	0.311993	0.202046	TNF/FABP5	2
GO:0033673	GO:0033673	negative regulation of kinase activity	2/74	237/18723	0.240764	0.311993	0.202046	GADD45B/IFNG	2
GO:0045123	GO:0045123	cellular extravasation	1/74	70/18723	0.242496	0.313889	0.203275	TNF	1
GO:0070830	GO:0070830	bicellular tight junction assembly	1/74	70/18723	0.242496	0.313889	0.203275	TNF	1
GO:0050851	GO:0050851	antigen receptor-mediated signaling pathway	2/74	240/18723	0.245153	0.317077	0.205339	PRNP/NFKBID	2
GO:0045824	GO:0045824	negative regulation of innate immune response	1/74	71/18723	0.245501	0.317077	0.205339	SERPINB9	1
GO:0072078	GO:0072078	nephron tubule morphogenesis	1/74	71/18723	0.245501	0.317077	0.205339	MYC	1
GO:0150116	GO:0150116	regulation of cell-substrate junction organization	1/74	71/18723	0.245501	0.317077	0.205339	SDC4	1
GO:0060047	GO:0060047	heart contraction	2/74	241/18723	0.246617	0.318343	0.206159	IL2/MAP2K3	2
GO:1903320	GO:1903320	regulation of protein modification by small protein conjugation or removal	2/74	242/18723	0.248081	0.319708	0.207043	HSP90AB1/BIRC3	2
GO:0001707	GO:0001707	mesoderm formation	1/74	72/18723	0.248494	0.319708	0.207043	KDM6B	1
GO:0002534	GO:0002534	cytokine production involved in inflammatory response	1/74	72/18723	0.248494	0.319708	0.207043	TNF	1
GO:0030330	GO:0030330	DNA damage response, signal transduction by p53 class mediator	1/74	72/18723	0.248494	0.319708	0.207043	PLK3	1
GO:0050709	GO:0050709	negative regulation of protein secretion	1/74	72/18723	0.248494	0.319708	0.207043	PIM3	1
GO:1900015	GO:1900015	regulation of cytokine production involved in inflammatory response	1/74	72/18723	0.248494	0.319708	0.207043	TNF	1
GO:0035773	GO:0035773	insulin secretion involved in cellular response to glucose stimulus	1/74	73/18723	0.251476	0.322656	0.208952	PIM3	1
GO:0035924	GO:0035924	cellular response to vascular endothelial growth factor stimulus	1/74	73/18723	0.251476	0.322656	0.208952	MAP2K3	1
GO:0070988	GO:0070988	demethylation	1/74	73/18723	0.251476	0.322656	0.208952	KDM6B	1
GO:0072088	GO:0072088	nephron epithelium morphogenesis	1/74	73/18723	0.251476	0.322656	0.208952	MYC	1
GO:0072089	GO:0072089	stem cell proliferation	1/74	73/18723	0.251476	0.322656	0.208952	ZFP36L1	1
GO:0098656	GO:0098656	anion transmembrane transport	2/74	245/18723	0.252476	0.323761	0.209668	SLC7A5/PRNP	2
GO:0006801	GO:0006801	superoxide metabolic process	1/74	74/18723	0.254446	0.324509	0.210152	PRDX1	1
GO:0009201	GO:0009201	ribonucleoside triphosphate biosynthetic process	1/74	74/18723	0.254446	0.324509	0.210152	IL4	1
GO:0030968	GO:0030968	endoplasmic reticulum unfolded protein response	1/74	74/18723	0.254446	0.324509	0.210152	BCL2L11	1
GO:0046323	GO:0046323	glucose import	1/74	74/18723	0.254446	0.324509	0.210152	TNF	1
GO:0046470	GO:0046470	phosphatidylcholine metabolic process	1/74	74/18723	0.254446	0.324509	0.210152	FABP5	1
GO:0048332	GO:0048332	mesoderm morphogenesis	1/74	74/18723	0.254446	0.324509	0.210152	KDM6B	1
GO:0051881	GO:0051881	regulation of mitochondrial membrane potential	1/74	74/18723	0.254446	0.324509	0.210152	BCL2L1	1
GO:0070972	GO:0070972	protein localization to endoplasmic reticulum	1/74	74/18723	0.254446	0.324509	0.210152	INSIG1	1
GO:0120192	GO:0120192	tight junction assembly	1/74	74/18723	0.254446	0.324509	0.210152	TNF	1
GO:1903201	GO:1903201	regulation of oxidative stress-induced cell death	1/74	74/18723	0.254446	0.324509	0.210152	NR4A3	1
GO:0022411	GO:0022411	cellular component disassembly	3/74	443/18723	0.25531	0.325433	0.21075	PLK3/TNF/MYC	3
GO:0006278	GO:0006278	RNA-dependent DNA biosynthetic process	1/74	75/18723	0.257405	0.326679	0.211557	HSP90AB1	1
GO:0033077	GO:0033077	T cell differentiation in thymus	1/74	75/18723	0.257405	0.326679	0.211557	ZFP36L1	1
GO:0043627	GO:0043627	response to estrogen	1/74	75/18723	0.257405	0.326679	0.211557	SERPINB9	1
GO:0045913	GO:0045913	positive regulation of carbohydrate metabolic process	1/74	75/18723	0.257405	0.326679	0.211557	IFNG	1
GO:0048662	GO:0048662	negative regulation of smooth muscle cell proliferation	1/74	75/18723	0.257405	0.326679	0.211557	IFNG	1
GO:0061333	GO:0061333	renal tubule morphogenesis	1/74	75/18723	0.257405	0.326679	0.211557	MYC	1
GO:1903363	GO:1903363	negative regulation of cellular protein catabolic process	1/74	75/18723	0.257405	0.326679	0.211557	HSP90AB1	1
GO:2001259	GO:2001259	positive regulation of cation channel activity	1/74	75/18723	0.257405	0.326679	0.211557	IFNG	1
GO:0006305	GO:0006305	DNA alkylation	1/74	76/18723	0.260351	0.328991	0.213054	MYC	1
GO:0006306	GO:0006306	DNA methylation	1/74	76/18723	0.260351	0.328991	0.213054	MYC	1
GO:0014823	GO:0014823	response to activity	1/74	76/18723	0.260351	0.328991	0.213054	KDM6B	1
GO:0014855	GO:0014855	striated muscle cell proliferation	1/74	76/18723	0.260351	0.328991	0.213054	CFLAR	1
GO:0031100	GO:0031100	animal organ regeneration	1/74	76/18723	0.260351	0.328991	0.213054	NR4A3	1
GO:0043536	GO:0043536	positive regulation of blood vessel endothelial cell migration	1/74	76/18723	0.260351	0.328991	0.213054	MAP2K3	1
GO:0045685	GO:0045685	regulation of glial cell differentiation	1/74	76/18723	0.260351	0.328991	0.213054	ID2	1
GO:0072028	GO:0072028	nephron morphogenesis	1/74	76/18723	0.260351	0.328991	0.213054	MYC	1
GO:0010876	GO:0010876	lipid localization	3/74	448/18723	0.260639	0.329176	0.213174	TNF/FABP5/NFKBIA	3
GO:0003015	GO:0003015	heart process	2/74	251/18723	0.261272	0.329798	0.213577	IL2/MAP2K3	2
GO:0090257	GO:0090257	regulation of muscle system process	2/74	252/18723	0.262739	0.33147	0.21466	LMNA/NR4A3	2
GO:0009165	GO:0009165	nucleotide biosynthetic process	2/74	254/18723	0.265672	0.334587	0.216679	IL4/NAMPT	2
GO:0030500	GO:0030500	regulation of bone mineralization	1/74	78/18723	0.26621	0.334587	0.216679	SRGN	1
GO:0032371	GO:0032371	regulation of sterol transport	1/74	78/18723	0.26621	0.334587	0.216679	NFKBIA	1
GO:0032374	GO:0032374	regulation of cholesterol transport	1/74	78/18723	0.26621	0.334587	0.216679	NFKBIA	1
GO:0043297	GO:0043297	apical junction assembly	1/74	78/18723	0.26621	0.334587	0.216679	TNF	1
GO:0061045	GO:0061045	negative regulation of wound healing	1/74	78/18723	0.26621	0.334587	0.216679	TNF	1
GO:0070373	GO:0070373	negative regulation of ERK1 and ERK2 cascade	1/74	78/18723	0.26621	0.334587	0.216679	DUSP4	1
GO:0006338	GO:0006338	chromatin remodeling	2/74	255/18723	0.267139	0.335573	0.217317	MYC/KDM6B	2
GO:0034976	GO:0034976	response to endoplasmic reticulum stress	2/74	256/18723	0.268606	0.337054	0.218276	BCL2L11/BCL2L1	2
GO:1901293	GO:1901293	nucleoside phosphate biosynthetic process	2/74	256/18723	0.268606	0.337054	0.218276	IL4/NAMPT	2
GO:0001895	GO:0001895	retina homeostasis	1/74	79/18723	0.269123	0.33716	0.218345	PRDX1	1
GO:0006446	GO:0006446	regulation of translational initiation	1/74	79/18723	0.269123	0.33716	0.218345	TNF	1
GO:0014068	GO:0014068	positive regulation of phosphatidylinositol 3-kinase signaling	1/74	79/18723	0.269123	0.33716	0.218345	TNF	1
GO:0005996	GO:0005996	monosaccharide metabolic process	2/74	257/18723	0.270073	0.338169	0.218998	TNF/FABP5	2
GO:0042593	GO:0042593	glucose homeostasis	2/74	258/18723	0.27154	0.339522	0.219874	FABP5/PIM3	2
GO:0001570	GO:0001570	vasculogenesis	1/74	80/18723	0.272024	0.339522	0.219874	ZFP36L1	1
GO:0009791	GO:0009791	post-embryonic development	1/74	80/18723	0.272024	0.339522	0.219874	BCL2L11	1
GO:0021766	GO:0021766	hippocampus development	1/74	80/18723	0.272024	0.339522	0.219874	KDM6B	1
GO:0032204	GO:0032204	regulation of telomere maintenance	1/74	80/18723	0.272024	0.339522	0.219874	MYC	1
GO:0120193	GO:0120193	tight junction organization	1/74	80/18723	0.272024	0.339522	0.219874	TNF	1
GO:0033500	GO:0033500	carbohydrate homeostasis	2/74	259/18723	0.273006	0.340566	0.220551	FABP5/PIM3	2
GO:0001942	GO:0001942	hair follicle development	1/74	81/18723	0.274913	0.341126	0.220913	TNF	1
GO:0006096	GO:0006096	glycolytic process	1/74	81/18723	0.274913	0.341126	0.220913	IFNG	1
GO:0010833	GO:0010833	telomere maintenance via telomere lengthening	1/74	81/18723	0.274913	0.341126	0.220913	HSP90AB1	1
GO:0014032	GO:0014032	neural crest cell development	1/74	81/18723	0.274913	0.341126	0.220913	NOLC1	1
GO:0021954	GO:0021954	central nervous system neuron development	1/74	81/18723	0.274913	0.341126	0.220913	HSP90AB1	1
GO:0044773	GO:0044773	mitotic DNA damage checkpoint signaling	1/74	81/18723	0.274913	0.341126	0.220913	PLK3	1
GO:0060968	GO:0060968	regulation of gene silencing	1/74	81/18723	0.274913	0.341126	0.220913	TNF	1
GO:1903533	GO:1903533	regulation of protein targeting	1/74	81/18723	0.274913	0.341126	0.220913	PRNP	1
GO:2000106	GO:2000106	regulation of leukocyte apoptotic process	1/74	81/18723	0.274913	0.341126	0.220913	IL2	1
GO:2001021	GO:2001021	negative regulation of response to DNA damage stimulus	1/74	81/18723	0.274913	0.341126	0.220913	BCL2L1	1
GO:0016570	GO:0016570	histone modification	3/74	463/18723	0.276713	0.342814	0.222006	LMNA/IRF4/KDM6B	3
GO:0022613	GO:0022613	ribonucleoprotein complex biogenesis	3/74	463/18723	0.276713	0.342814	0.222006	HSP90AB1/DDX21/NOLC1	3
GO:0023061	GO:0023061	signal release	3/74	463/18723	0.276713	0.342814	0.222006	TNF/PIM3/IFNG	3
GO:0031330	GO:0031330	negative regulation of cellular catabolic process	2/74	262/18723	0.277406	0.343241	0.222283	HSP90AB1/NAMPT	2
GO:0006757	GO:0006757	ATP generation from ADP	1/74	82/18723	0.277792	0.343241	0.222283	IFNG	1
GO:0009205	GO:0009205	purine ribonucleoside triphosphate metabolic process	1/74	82/18723	0.277792	0.343241	0.222283	IL4	1
GO:0043242	GO:0043242	negative regulation of protein-containing complex disassembly	1/74	82/18723	0.277792	0.343241	0.222283	TNF	1
GO:0050000	GO:0050000	chromosome localization	1/74	82/18723	0.277792	0.343241	0.222283	LMNA	1
GO:0003018	GO:0003018	vascular process in circulatory system	2/74	263/18723	0.278873	0.344395	0.22303	FABP5/SLC7A5	2
GO:0006112	GO:0006112	energy reserve metabolic process	1/74	84/18723	0.283514	0.348654	0.225788	MYC	1
GO:0022404	GO:0022404	molting cycle process	1/74	84/18723	0.283514	0.348654	0.225788	TNF	1
GO:0022405	GO:0022405	hair cycle process	1/74	84/18723	0.283514	0.348654	0.225788	TNF	1
GO:0032370	GO:0032370	positive regulation of lipid transport	1/74	84/18723	0.283514	0.348654	0.225788	NFKBIA	1
GO:0061157	GO:0061157	mRNA destabilization	1/74	84/18723	0.283514	0.348654	0.225788	ZFP36L1	1
GO:0097061	GO:0097061	dendritic spine organization	1/74	84/18723	0.283514	0.348654	0.225788	PRNP	1
GO:0098586	GO:0098586	cellular response to virus	1/74	84/18723	0.283514	0.348654	0.225788	BIRC3	1
GO:2000134	GO:2000134	negative regulation of G1/S transition of mitotic cell cycle	1/74	84/18723	0.283514	0.348654	0.225788	PLK3	1
GO:0032412	GO:0032412	regulation of ion transmembrane transporter activity	2/74	267/18723	0.284737	0.349974	0.226643	PRNP/IFNG	2
GO:0051348	GO:0051348	negative regulation of transferase activity	2/74	268/18723	0.286203	0.350127	0.226742	GADD45B/IFNG	2
GO:0001656	GO:0001656	metanephros development	1/74	85/18723	0.286359	0.350127	0.226742	MYC	1
GO:0009142	GO:0009142	nucleoside triphosphate biosynthetic process	1/74	85/18723	0.286359	0.350127	0.226742	IL4	1
GO:0010507	GO:0010507	negative regulation of autophagy	1/74	85/18723	0.286359	0.350127	0.226742	NAMPT	1
GO:0032092	GO:0032092	positive regulation of protein binding	1/74	85/18723	0.286359	0.350127	0.226742	HSP90AB1	1
GO:0044774	GO:0044774	mitotic DNA integrity checkpoint signaling	1/74	85/18723	0.286359	0.350127	0.226742	PLK3	1
GO:0045069	GO:0045069	regulation of viral genome replication	1/74	85/18723	0.286359	0.350127	0.226742	TNF	1
GO:0055013	GO:0055013	cardiac muscle cell development	1/74	85/18723	0.286359	0.350127	0.226742	LMNA	1
GO:0060021	GO:0060021	roof of mouth development	1/74	85/18723	0.286359	0.350127	0.226742	INSIG1	1
GO:0098773	GO:0098773	skin epidermis development	1/74	85/18723	0.286359	0.350127	0.226742	TNF	1
GO:0014031	GO:0014031	mesenchymal cell development	1/74	86/18723	0.289192	0.352854	0.228508	NOLC1	1
GO:0015908	GO:0015908	fatty acid transport	1/74	86/18723	0.289192	0.352854	0.228508	FABP5	1
GO:0034103	GO:0034103	regulation of tissue remodeling	1/74	86/18723	0.289192	0.352854	0.228508	IL2	1
GO:0048864	GO:0048864	stem cell development	1/74	86/18723	0.289192	0.352854	0.228508	NOLC1	1
GO:0044070	GO:0044070	regulation of anion transport	1/74	87/18723	0.292015	0.355555	0.230258	PRNP	1
GO:0048041	GO:0048041	focal adhesion assembly	1/74	87/18723	0.292015	0.355555	0.230258	SDC4	1
GO:0061014	GO:0061014	positive regulation of mRNA catabolic process	1/74	87/18723	0.292015	0.355555	0.230258	ZFP36L1	1
GO:2000177	GO:2000177	regulation of neural precursor cell proliferation	1/74	87/18723	0.292015	0.355555	0.230258	ID2	1
GO:0001843	GO:0001843	neural tube closure	1/74	88/18723	0.294826	0.358419	0.232112	SDC4	1
GO:0009144	GO:0009144	purine nucleoside triphosphate metabolic process	1/74	88/18723	0.294826	0.358419	0.232112	IL4	1
GO:0050779	GO:0050779	RNA destabilization	1/74	88/18723	0.294826	0.358419	0.232112	ZFP36L1	1
GO:0009199	GO:0009199	ribonucleoside triphosphate metabolic process	1/74	89/18723	0.297626	0.361072	0.233831	IL4	1
GO:0014910	GO:0014910	regulation of smooth muscle cell migration	1/74	89/18723	0.297626	0.361072	0.233831	NR4A3	1
GO:0060606	GO:0060606	tube closure	1/74	89/18723	0.297626	0.361072	0.233831	SDC4	1
GO:1900407	GO:1900407	regulation of cellular response to oxidative stress	1/74	89/18723	0.297626	0.361072	0.233831	NR4A3	1
GO:0007548	GO:0007548	sex differentiation	2/74	276/18723	0.297917	0.361237	0.233937	BCL2L11/BCL2L1	2
GO:0046034	GO:0046034	ATP metabolic process	2/74	277/18723	0.299379	0.362823	0.234964	IL4/IFNG	2
GO:0034644	GO:0034644	cellular response to UV	1/74	90/18723	0.300415	0.363326	0.23529	MYC	1
GO:0042475	GO:0042475	odontogenesis of dentin-containing tooth	1/74	90/18723	0.300415	0.363326	0.23529	BCL2L11	1
GO:0046031	GO:0046031	ADP metabolic process	1/74	90/18723	0.300415	0.363326	0.23529	IFNG	1
GO:0061097	GO:0061097	regulation of protein tyrosine kinase activity	1/74	90/18723	0.300415	0.363326	0.23529	PRNP	1
GO:0022898	GO:0022898	regulation of transmembrane transporter activity	2/74	278/18723	0.300841	0.363465	0.23538	PRNP/IFNG	2
GO:0110053	GO:0110053	regulation of actin filament organization	2/74	278/18723	0.300841	0.363465	0.23538	RGCC/SDC4	2
GO:0002065	GO:0002065	columnar/cuboidal epithelial cell differentiation	1/74	91/18723	0.303194	0.365363	0.236609	IL13	1
GO:0014033	GO:0014033	neural crest cell differentiation	1/74	91/18723	0.303194	0.365363	0.236609	NOLC1	1
GO:0055006	GO:0055006	cardiac cell development	1/74	91/18723	0.303194	0.365363	0.236609	LMNA	1
GO:0072080	GO:0072080	nephron tubule development	1/74	91/18723	0.303194	0.365363	0.236609	MYC	1
GO:0098661	GO:0098661	inorganic anion transmembrane transport	1/74	91/18723	0.303194	0.365363	0.236609	PRNP	1
GO:0009117	GO:0009117	nucleotide metabolic process	3/74	489/18723	0.304806	0.367116	0.237745	IL4/NAMPT/IFNG	3
GO:0006470	GO:0006470	protein dephosphorylation	2/74	281/18723	0.305225	0.367373	0.237911	TNF/HSP90AB1	2
GO:0010498	GO:0010498	proteasomal protein catabolic process	3/74	490/18723	0.30589	0.367373	0.237911	PLK3/HSP90AB1/RNF19A	3
GO:0031058	GO:0031058	positive regulation of histone modification	1/74	92/18723	0.305961	0.367373	0.237911	LMNA	1
GO:0035249	GO:0035249	synaptic transmission, glutamatergic	1/74	92/18723	0.305961	0.367373	0.237911	TNF	1
GO:0048525	GO:0048525	negative regulation of viral process	1/74	92/18723	0.305961	0.367373	0.237911	TNF	1
GO:0070509	GO:0070509	calcium ion import	1/74	92/18723	0.305961	0.367373	0.237911	PRNP	1
GO:0032088	GO:0032088	negative regulation of NF-kappaB transcription factor activity	1/74	93/18723	0.308718	0.369167	0.239073	NFKBIA	1
GO:0051591	GO:0051591	response to cAMP	1/74	93/18723	0.308718	0.369167	0.239073	ZFP36L1	1
GO:0060349	GO:0060349	bone morphogenesis	1/74	93/18723	0.308718	0.369167	0.239073	INSIG1	1
GO:0060993	GO:0060993	kidney morphogenesis	1/74	93/18723	0.308718	0.369167	0.239073	MYC	1
GO:0106027	GO:0106027	neuron projection organization	1/74	93/18723	0.308718	0.369167	0.239073	PRNP	1
GO:1901796	GO:1901796	regulation of signal transduction by p53 class mediator	1/74	93/18723	0.308718	0.369167	0.239073	PLK3	1
GO:1901992	GO:1901992	positive regulation of mitotic cell cycle phase transition	1/74	93/18723	0.308718	0.369167	0.239073	RGCC	1
GO:1902807	GO:1902807	negative regulation of cell cycle G1/S phase transition	1/74	93/18723	0.308718	0.369167	0.239073	PLK3	1
GO:0048562	GO:0048562	embryonic organ morphogenesis	2/74	285/18723	0.311063	0.371123	0.240339	ID2/INSIG1	2
GO:0000079	GO:0000079	regulation of cyclin-dependent protein serine/threonine kinase activity	1/74	94/18723	0.311464	0.371123	0.240339	RGCC	1
GO:0014020	GO:0014020	primary neural tube formation	1/74	94/18723	0.311464	0.371123	0.240339	SDC4	1
GO:0019080	GO:0019080	viral gene expression	1/74	94/18723	0.311464	0.371123	0.240339	CCL4	1
GO:0051702	GO:0051702	biological process involved in interaction with symbiont	1/74	94/18723	0.311464	0.371123	0.240339	CCL4	1
GO:0061326	GO:0061326	renal tubule development	1/74	94/18723	0.311464	0.371123	0.240339	MYC	1
GO:1903035	GO:1903035	negative regulation of response to wounding	1/74	94/18723	0.311464	0.371123	0.240339	TNF	1
GO:0006753	GO:0006753	nucleoside phosphate metabolic process	3/74	497/18723	0.313486	0.372673	0.241343	IL4/NAMPT/IFNG	3
GO:0002532	GO:0002532	production of molecular mediator involved in inflammatory response	1/74	95/18723	0.314199	0.372673	0.241343	TNF	1
GO:0007044	GO:0007044	cell-substrate junction assembly	1/74	95/18723	0.314199	0.372673	0.241343	SDC4	1
GO:0008585	GO:0008585	female gonad development	1/74	95/18723	0.314199	0.372673	0.241343	BCL2L1	1
GO:0008593	GO:0008593	regulation of Notch signaling pathway	1/74	95/18723	0.314199	0.372673	0.241343	NFKBIA	1
GO:0032479	GO:0032479	regulation of type I interferon production	1/74	95/18723	0.314199	0.372673	0.241343	REL	1
GO:0032606	GO:0032606	type I interferon production	1/74	95/18723	0.314199	0.372673	0.241343	REL	1
GO:0036473	GO:0036473	cell death in response to oxidative stress	1/74	95/18723	0.314199	0.372673	0.241343	NR4A3	1
GO:1901379	GO:1901379	regulation of potassium ion transmembrane transport	1/74	95/18723	0.314199	0.372673	0.241343	PRNP	1
GO:1903311	GO:1903311	regulation of mRNA metabolic process	2/74	288/18723	0.315435	0.373949	0.24217	NCL/ZFP36L1	2
GO:0034620	GO:0034620	cellular response to unfolded protein	1/74	96/18723	0.316923	0.374764	0.242697	BCL2L11	1
GO:0042472	GO:0042472	inner ear morphogenesis	1/74	96/18723	0.316923	0.374764	0.242697	INSIG1	1
GO:0042632	GO:0042632	cholesterol homeostasis	1/74	96/18723	0.316923	0.374764	0.242697	INSIG1	1
GO:0043648	GO:0043648	dicarboxylic acid metabolic process	1/74	96/18723	0.316923	0.374764	0.242697	MTHFD2	1
GO:1901655	GO:1901655	cellular response to ketone	1/74	96/18723	0.316923	0.374764	0.242697	CFLAR	1
GO:0014909	GO:0014909	smooth muscle cell migration	1/74	97/18723	0.319637	0.377401	0.244405	NR4A3	1
GO:0055092	GO:0055092	sterol homeostasis	1/74	97/18723	0.319637	0.377401	0.244405	INSIG1	1
GO:0070167	GO:0070167	regulation of biomineral tissue development	1/74	97/18723	0.319637	0.377401	0.244405	SRGN	1
GO:0003333	GO:0003333	amino acid transmembrane transport	1/74	98/18723	0.32234	0.379825	0.245975	SLC7A5	1
GO:0043473	GO:0043473	pigmentation	1/74	98/18723	0.32234	0.379825	0.245975	BCL2L11	1
GO:1902882	GO:1902882	regulation of response to oxidative stress	1/74	98/18723	0.32234	0.379825	0.245975	NR4A3	1
GO:2001243	GO:2001243	negative regulation of intrinsic apoptotic signaling pathway	1/74	98/18723	0.32234	0.379825	0.245975	BCL2L1	1
GO:0006165	GO:0006165	nucleoside diphosphate phosphorylation	1/74	99/18723	0.325032	0.381844	0.247282	IFNG	1
GO:0007631	GO:0007631	feeding behavior	1/74	99/18723	0.325032	0.381844	0.247282	NR4A3	1
GO:0010717	GO:0010717	regulation of epithelial to mesenchymal transition	1/74	99/18723	0.325032	0.381844	0.247282	RGCC	1
GO:0060291	GO:0060291	long-term synaptic potentiation	1/74	99/18723	0.325032	0.381844	0.247282	PRNP	1
GO:0060996	GO:0060996	dendritic spine development	1/74	99/18723	0.325032	0.381844	0.247282	IL2	1
GO:0110149	GO:0110149	regulation of biomineralization	1/74	99/18723	0.325032	0.381844	0.247282	SRGN	1
GO:0050890	GO:0050890	cognition	2/74	296/18723	0.327065	0.383838	0.248573	TNF/PRNP	2
GO:0006626	GO:0006626	protein targeting to mitochondrion	1/74	100/18723	0.327714	0.383838	0.248573	TOMM40	1
GO:0006641	GO:0006641	triglyceride metabolic process	1/74	100/18723	0.327714	0.383838	0.248573	INSIG1	1
GO:0044728	GO:0044728	DNA methylation or demethylation	1/74	100/18723	0.327714	0.383838	0.248573	MYC	1
GO:0045807	GO:0045807	positive regulation of endocytosis	1/74	100/18723	0.327714	0.383838	0.248573	IL4	1
GO:0046545	GO:0046545	development of primary female sexual characteristics	1/74	100/18723	0.327714	0.383838	0.248573	BCL2L1	1
GO:0006476	GO:0006476	protein deacetylation	1/74	101/18723	0.330386	0.385807	0.249849	IFNG	1
GO:0006576	GO:0006576	cellular biogenic amine metabolic process	1/74	101/18723	0.330386	0.385807	0.249849	ODC1	1
[truncated: 340 more rows]

## Sheet: CD8+_C3_C4_up_go
	ID	Description	GeneRatio	BgRatio	pvalue	p.adjust	qvalue	geneID	Count
GO:0001819	GO:0001819	positive regulation of cytokine production	16/55	467/18723	2.11821e-13	4.68549e-10	2.59314e-10	XCL1/PTGS2/CD55/CD200/IL2/CSF2/IL13/IL4/TNF/CD40LG/NR4A3/CRTAM/IFNG/RGCC/CCL1/CCL3	16
GO:1903037	GO:1903037	regulation of leukocyte cell-cell adhesion	14/55	336/18723	6.15194e-13	6.80405e-10	3.76563e-10	XCL1/CD55/IL2/IL4/TNF/CD40LG/NR4A3/CRTAM/IFNG/HSPH1/PRNP/SDC4/TNFSF14/NFKBID	14
GO:0022407	GO:0022407	regulation of cell-cell adhesion	15/55	448/18723	1.89588e-12	1.30033e-09	7.19658e-10	XCL1/CD55/IL2/IL4/TNF/CD40LG/NR4A3/CRTAM/IFNG/HSPH1/RGCC/PRNP/SDC4/TNFSF14/NFKBID	15
GO:0007159	GO:0007159	leukocyte cell-cell adhesion	14/55	371/18723	2.35142e-12	1.30033e-09	7.19658e-10	XCL1/CD55/IL2/IL4/TNF/CD40LG/NR4A3/CRTAM/IFNG/HSPH1/PRNP/SDC4/TNFSF14/NFKBID	14
GO:0050863	GO:0050863	regulation of T cell activation	13/55	329/18723	8.99039e-12	3.97735e-09	2.20123e-09	XCL1/CD55/IL2/IL4/CD40LG/TNFSF8/CRTAM/IFNG/HSPH1/PRNP/SDC4/TNFSF14/NFKBID	13
GO:0042531	GO:0042531	positive regulation of tyrosine phosphorylation of STAT protein	8/55	68/18723	2.10452e-11	7.75867e-09	4.29397e-09	IL2/IL3/CSF2/IL13/IL4/TNF/IFNG/LIF	8
GO:1903039	GO:1903039	positive regulation of leukocyte cell-cell adhesion	11/55	239/18723	8.50202e-11	2.44469e-08	1.35299e-08	XCL1/CD55/IL2/IL4/TNF/CD40LG/NR4A3/IFNG/HSPH1/TNFSF14/NFKBID	11
GO:0042110	GO:0042110	T cell activation	14/55	487/18723	8.84156e-11	2.44469e-08	1.35299e-08	XCL1/CD55/IL2/IL4/CD40LG/TNFSF8/CRTAM/IFNG/HSPH1/PRNP/SDC4/TNFSF14/NFKBID/ZFP36L1	14
GO:0042509	GO:0042509	regulation of tyrosine phosphorylation of STAT protein	8/55	85/18723	1.31897e-10	3.24174e-08	1.79411e-08	IL2/IL3/CSF2/IL13/IL4/TNF/IFNG/LIF	8
GO:0007260	GO:0007260	tyrosine phosphorylation of STAT protein	8/55	88/18723	1.74988e-10	3.87073e-08	2.14222e-08	IL2/IL3/CSF2/IL13/IL4/TNF/IFNG/LIF	8
GO:0050731	GO:0050731	positive regulation of peptidyl-tyrosine phosphorylation	10/55	193/18723	2.09695e-10	4.21678e-08	2.33374e-08	AREG/IL2/IL3/CSF2/IL13/IL4/TNF/IFNG/PRNP/LIF	10
GO:0042098	GO:0042098	T cell proliferation	10/55	199/18723	2.83118e-10	5.17697e-08	2.86515e-08	XCL1/CD55/IL2/IL4/CD40LG/TNFSF8/CRTAM/PRNP/SDC4/TNFSF14	10
GO:0045785	GO:0045785	positive regulation of cell adhesion	13/55	437/18723	3.04252e-10	5.17697e-08	2.86515e-08	XCL1/CD55/IL2/IL4/TNF/CD40LG/NR4A3/IFNG/HSPH1/SDC4/TNFSF14/NFKBID/LIF	13
GO:0022409	GO:0022409	positive regulation of cell-cell adhesion	11/55	284/18723	5.33822e-10	8.43439e-08	4.66793e-08	XCL1/CD55/IL2/IL4/TNF/CD40LG/NR4A3/IFNG/HSPH1/TNFSF14/NFKBID	11
GO:0046651	GO:0046651	lymphocyte proliferation	11/55	288/18723	6.18909e-10	8.6435e-08	4.78367e-08	XCL1/CD55/IL2/IL13/IL4/CD40LG/TNFSF8/CRTAM/PRNP/SDC4/TNFSF14	11
GO:0046634	GO:0046634	regulation of alpha-beta T cell activation	8/55	104/18723	6.76554e-10	8.6435e-08	4.78367e-08	XCL1/CD55/IL2/IL4/CRTAM/IFNG/HSPH1/NFKBID	8
GO:0032943	GO:0032943	mononuclear cell proliferation	11/55	291/18723	6.90511e-10	8.6435e-08	4.78367e-08	XCL1/CD55/IL2/IL13/IL4/CD40LG/TNFSF8/CRTAM/PRNP/SDC4/TNFSF14	11
GO:0046631	GO:0046631	alpha-beta T cell activation	9/55	156/18723	7.03359e-10	8.6435e-08	4.78367e-08	XCL1/CD55/IL2/IL4/TNFSF8/CRTAM/IFNG/HSPH1/NFKBID	9
GO:0071677	GO:0071677	positive regulation of mononuclear cell migration	7/55	65/18723	7.75802e-10	9.03197e-08	4.99866e-08	XCL2/XCL1/IL4/TNF/CCL1/CCL3/CCL4	7
GO:0050670	GO:0050670	regulation of lymphocyte proliferation	10/55	225/18723	9.37778e-10	1.02747e-07	5.68644e-08	XCL1/CD55/IL2/IL13/IL4/CD40LG/TNFSF8/CRTAM/PRNP/SDC4	10
GO:0050727	GO:0050727	regulation of inflammatory response	12/55	386/18723	9.81691e-10	1.02747e-07	5.68644e-08	XCL1/PTGS2/CD200/IL2/IL13/IL4/TNF/BIRC3/IFNG/NFKBIA/CCL1/CCL3	12
GO:0032944	GO:0032944	regulation of mononuclear cell proliferation	10/55	227/18723	1.0219e-09	1.02747e-07	5.68644e-08	XCL1/CD55/IL2/IL13/IL4/CD40LG/TNFSF8/CRTAM/PRNP/SDC4	10
GO:0002699	GO:0002699	positive regulation of immune effector process	10/55	235/18723	1.42951e-09	1.37482e-07	7.60879e-08	XCL1/CD55/IL2/IL13/IL4/TNF/NR4A3/CRTAM/IFNG/NFKBID	10
GO:0071675	GO:0071675	regulation of mononuclear cell migration	8/55	115/18723	1.51581e-09	1.39707e-07	7.73196e-08	XCL2/XCL1/CD200/IL4/TNF/CCL1/CCL3/CCL4	8
GO:0042129	GO:0042129	regulation of T cell proliferation	9/55	171/18723	1.58725e-09	1.4044e-07	7.77252e-08	XCL1/CD55/IL2/IL4/CD40LG/TNFSF8/CRTAM/PRNP/SDC4	9
GO:0070661	GO:0070661	leukocyte proliferation	11/55	318/18723	1.75642e-09	1.49431e-07	8.2701e-08	XCL1/CD55/IL2/IL13/IL4/CD40LG/TNFSF8/CRTAM/PRNP/SDC4/TNFSF14	11
GO:0002696	GO:0002696	positive regulation of leukocyte activation	12/55	409/18723	1.88953e-09	1.54802e-07	8.56735e-08	XCL1/CD55/IL2/IL13/IL4/CD40LG/NR4A3/IFNG/HSPH1/CCL3/TNFSF14/NFKBID	12
GO:0070663	GO:0070663	regulation of leukocyte proliferation	10/55	245/18723	2.13838e-09	1.68932e-07	9.3494e-08	XCL1/CD55/IL2/IL13/IL4/CD40LG/TNFSF8/CRTAM/PRNP/SDC4	10
GO:0050867	GO:0050867	positive regulation of cell activation	12/55	420/18723	2.54825e-09	1.90843e-07	1.0562e-07	XCL1/CD55/IL2/IL13/IL4/CD40LG/NR4A3/IFNG/HSPH1/CCL3/TNFSF14/NFKBID	12
GO:0070371	GO:0070371	ERK1 and ERK2 cascade	11/55	330/18723	2.58828e-09	1.90843e-07	1.0562e-07	XCL2/XCL1/TNF/DUSP4/MYC/DUSP6/CCL1/CCL3/CCL4/LIF/ZFP36L1	11
GO:0034612	GO:0034612	response to tumor necrosis factor	10/55	253/18723	2.91448e-09	2.07962e-07	1.15095e-07	XCL2/XCL1/PTGS2/TNF/BIRC3/NFKBIA/CCL1/CCL3/CCL4/ZFP36L1	10
GO:0032103	GO:0032103	positive regulation of response to external stimulus	12/55	427/18723	3.06882e-09	2.10676e-07	1.16597e-07	XCL2/XCL1/PTGS2/IL2/IL4/TNF/CRTAM/IFNG/NFKBIA/CCL1/CCL3/CCL4	12
GO:0150076	GO:0150076	neuroinflammatory response	6/55	44/18723	3.143e-09	2.10676e-07	1.16597e-07	PTGS2/CD200/IL4/TNF/IFNG/CCL3	6
GO:0002697	GO:0002697	regulation of immune effector process	11/55	339/18723	3.42761e-09	2.22997e-07	1.23415e-07	XCL1/CD55/IL2/IL13/IL4/TNF/CD40LG/NR4A3/CRTAM/IFNG/NFKBID	11
GO:0001906	GO:0001906	cell killing	9/55	188/18723	3.65779e-09	2.31172e-07	1.2794e-07	PRDX1/XCL1/CD55/IL13/IL4/HSP90AB1/CRTAM/IFNG/GZMB	9
GO:0002443	GO:0002443	leukocyte mediated immunity	12/55	440/18723	4.2965e-09	2.62268e-07	1.4515e-07	PRDX1/XCL1/CD55/IL2/IL13/IL4/TNF/CD40LG/NR4A3/CRTAM/GZMB/CCL3	12
GO:0050730	GO:0050730	regulation of peptidyl-tyrosine phosphorylation	10/55	264/18723	4.38694e-09	2.62268e-07	1.4515e-07	AREG/IL2/IL3/CSF2/IL13/IL4/TNF/IFNG/PRNP/LIF	10
GO:0071674	GO:0071674	mononuclear cell migration	9/55	196/18723	5.27072e-09	3.06812e-07	1.69802e-07	XCL2/XCL1/CD200/IL4/TNF/CRTAM/CCL1/CCL3/CCL4	9
GO:0001818	GO:0001818	negative regulation of cytokine production	11/55	357/18723	5.87101e-09	3.32991e-07	1.84291e-07	XCL1/REL/CD200/IL13/IL4/TNF/HSP90AB1/SRGN/IFNG/RGCC/PRNP	11
GO:0070997	GO:0070997	neuron death	11/55	361/18723	6.5903e-09	3.64444e-07	2.01698e-07	REL/NR4A2/CD200/IL13/TNF/HSP90AB1/NR4A3/HSPA5/IFNG/CCL3/PRNP	11
GO:1902105	GO:1902105	regulation of leukocyte differentiation	10/55	279/18723	7.44511e-09	4.01673e-07	2.22302e-07	IL2/IL4/TNF/MYC/CRTAM/IFNG/CCL3/NFKBID/LIF/ZFP36L1	10
GO:1903706	GO:1903706	regulation of hemopoiesis	11/55	367/18723	7.81748e-09	4.1172e-07	2.27863e-07	IL2/IL4/TNF/MYC/CRTAM/IFNG/NFKBIA/CCL3/NFKBID/LIF/ZFP36L1	11
GO:0050870	GO:0050870	positive regulation of T cell activation	9/55	216/18723	1.23002e-08	6.32747e-07	3.50188e-07	XCL1/CD55/IL2/IL4/CD40LG/IFNG/HSPH1/TNFSF14/NFKBID	9
GO:0097278	GO:0097278	complement-dependent cytotoxicity	4/55	10/18723	1.38104e-08	6.94288e-07	3.84247e-07	CD55/IL13/IL4/HSP90AB1	4
GO:0031341	GO:0031341	regulation of cell killing	7/55	99/18723	1.53685e-08	7.55445e-07	4.18094e-07	XCL1/CD55/IL13/IL4/HSP90AB1/CRTAM/IFNG	7
GO:0071356	GO:0071356	cellular response to tumor necrosis factor	9/55	229/18723	2.04171e-08	9.81798e-07	5.43367e-07	XCL2/XCL1/TNF/BIRC3/NFKBIA/CCL1/CCL3/CCL4/ZFP36L1	9
GO:0042116	GO:0042116	macrophage activation	7/55	106/18723	2.47652e-08	1.15476e-06	6.39092e-07	CD200/CSF2/IL13/IL4/TNF/IFNG/CCL3	7
GO:0002700	GO:0002700	regulation of production of molecular mediator of immune response	8/55	164/18723	2.50581e-08	1.15476e-06	6.39092e-07	XCL1/CD55/IL2/IL13/IL4/TNF/CD40LG/NR4A3	8
GO:1901214	GO:1901214	regulation of neuron death	10/55	319/18723	2.65684e-08	1.19937e-06	6.63781e-07	REL/NR4A2/CD200/IL13/TNF/HSP90AB1/NR4A3/IFNG/CCL3/PRNP	10
GO:0007259	GO:0007259	receptor signaling pathway via JAK-STAT	8/55	170/18723	3.31624e-08	1.4671e-06	8.11955e-07	IL2/IL3/CSF2/IL13/IL4/TNF/IFNG/LIF	8
GO:2000514	GO:2000514	regulation of CD4-positive, alpha-beta T cell activation	6/55	67/18723	4.21959e-08	1.83015e-06	1.01288e-06	XCL1/CD55/IL2/IL4/IFNG/NFKBID	6
GO:0002683	GO:0002683	negative regulation of immune system process	11/55	434/18723	4.37271e-08	1.86008e-06	1.02945e-06	XCL1/CD55/CD200/IL2/IL4/TNF/MYC/CRTAM/CCL3/PRNP/SDC4	11
GO:0072676	GO:0072676	lymphocyte migration	7/55	117/18723	4.91673e-08	2.05204e-06	1.13568e-06	XCL2/XCL1/CD200/CRTAM/CCL1/CCL3/CCL4	7
GO:0071346	GO:0071346	cellular response to interferon-gamma	7/55	118/18723	5.21505e-08	2.13624e-06	1.18228e-06	XCL2/XCL1/HSP90AB1/IFNG/CCL1/CCL3/CCL4	7
GO:0097696	GO:0097696	receptor signaling pathway via STAT	8/55	181/18723	5.39819e-08	2.17105e-06	1.20155e-06	IL2/IL3/CSF2/IL13/IL4/TNF/IFNG/LIF	8
GO:0002761	GO:0002761	regulation of myeloid leukocyte differentiation	7/55	120/18723	5.85783e-08	2.31384e-06	1.28057e-06	IL4/TNF/MYC/IFNG/CCL3/LIF/ZFP36L1	7
GO:0002637	GO:0002637	regulation of immunoglobulin production	6/55	73/18723	7.10138e-08	2.75583e-06	1.52519e-06	XCL1/IL2/IL13/IL4/TNF/CD40LG	6
GO:0051251	GO:0051251	positive regulation of lymphocyte activation	10/55	362/18723	8.7034e-08	3.3193e-06	1.83703e-06	XCL1/CD55/IL2/IL13/IL4/CD40LG/IFNG/HSPH1/TNFSF14/NFKBID	10
GO:0150077	GO:0150077	regulation of neuroinflammatory response	5/55	40/18723	1.10491e-07	4.14249e-06	2.29262e-06	PTGS2/CD200/IL4/TNF/CCL3	5
GO:0018108	GO:0018108	peptidyl-tyrosine phosphorylation	10/55	375/18723	1.20874e-07	4.45622e-06	2.46625e-06	AREG/IL2/IL3/CSF2/IL13/IL4/TNF/IFNG/PRNP/LIF	10
GO:0071634	GO:0071634	regulation of transforming growth factor beta production	5/55	41/18723	1.25557e-07	4.553e-06	2.51982e-06	XCL1/PTGS2/CD200/IL13/HSP90AB1	5
GO:0018212	GO:0018212	peptidyl-tyrosine modification	10/55	378/18723	1.3016e-07	4.62742e-06	2.561e-06	AREG/IL2/IL3/CSF2/IL13/IL4/TNF/IFNG/PRNP/LIF	10
GO:0002687	GO:0002687	positive regulation of leukocyte migration	7/55	135/18723	1.31794e-07	4.62742e-06	2.561e-06	XCL2/XCL1/IL4/TNF/CCL1/CCL3/CCL4	7
GO:0002573	GO:0002573	myeloid leukocyte differentiation	8/55	208/18723	1.57755e-07	5.45239e-06	3.01757e-06	CSF2/IL4/TNF/MYC/IFNG/CCL3/LIF/ZFP36L1	8
GO:0071604	GO:0071604	transforming growth factor beta production	5/55	43/18723	1.60561e-07	5.46402e-06	3.02401e-06	XCL1/PTGS2/CD200/IL13/HSP90AB1	5
GO:0002685	GO:0002685	regulation of leukocyte migration	8/55	210/18723	1.69766e-07	5.60482e-06	3.10194e-06	XCL2/XCL1/CD200/IL4/TNF/CCL1/CCL3/CCL4	8
GO:0045637	GO:0045637	regulation of myeloid cell differentiation	8/55	210/18723	1.69766e-07	5.60482e-06	3.10194e-06	IL4/TNF/MYC/IFNG/NFKBIA/CCL3/LIF/ZFP36L1	8
GO:0034341	GO:0034341	response to interferon-gamma	7/55	141/18723	1.775e-07	5.77397e-06	3.19555e-06	XCL2/XCL1/HSP90AB1/IFNG/CCL1/CCL3/CCL4	7
GO:0050729	GO:0050729	positive regulation of inflammatory response	7/55	142/18723	1.86284e-07	5.97189e-06	3.30508e-06	PTGS2/IL2/TNF/IFNG/NFKBIA/CCL1/CCL3	7
GO:0048245	GO:0048245	eosinophil chemotaxis	4/55	19/18723	2.49947e-07	7.78707e-06	4.30968e-06	IL4/CCL1/CCL3/CCL4	4
GO:0140131	GO:0140131	positive regulation of lymphocyte chemotaxis	4/55	19/18723	2.49947e-07	7.78707e-06	4.30968e-06	XCL2/XCL1/CCL3/CCL4	4
GO:0001774	GO:0001774	microglial cell activation	5/55	47/18723	2.53592e-07	7.79091e-06	4.3118e-06	IL13/IL4/TNF/IFNG/CCL3	5
GO:0070372	GO:0070372	regulation of ERK1 and ERK2 cascade	9/55	309/18723	2.64072e-07	8.00174e-06	4.42849e-06	XCL2/XCL1/TNF/DUSP4/DUSP6/CCL1/CCL3/CCL4/LIF	9
GO:0002274	GO:0002274	myeloid leukocyte activation	8/55	223/18723	2.68736e-07	8.03302e-06	4.4458e-06	CD200/CSF2/IL13/IL4/TNF/NR4A3/IFNG/CCL3	8
GO:0002690	GO:0002690	positive regulation of leukocyte chemotaxis	6/55	94/18723	3.24011e-07	9.55615e-06	5.28876e-06	XCL2/XCL1/IL4/CCL1/CCL3/CCL4	6
GO:1904035	GO:1904035	regulation of epithelial cell apoptotic process	6/55	96/18723	3.67257e-07	1.04667e-05	5.79268e-06	IL13/IL4/TNF/CD40LG/RGCC/ZFP36L1	6
GO:1902107	GO:1902107	positive regulation of leukocyte differentiation	7/55	157/18723	3.69078e-07	1.04667e-05	5.79268e-06	IL2/IL4/TNF/IFNG/NFKBID/LIF/ZFP36L1	7
GO:1903708	GO:1903708	positive regulation of hemopoiesis	7/55	157/18723	3.69078e-07	1.04667e-05	5.79268e-06	IL2/IL4/TNF/IFNG/NFKBID/LIF/ZFP36L1	7
GO:1903131	GO:1903131	mononuclear cell differentiation	10/55	426/18723	3.92125e-07	1.09795e-05	6.07651e-06	IL2/CSF2/IL4/CD40LG/MYC/TNFSF8/CRTAM/IFNG/NFKBID/ZFP36L1	10
GO:0035710	GO:0035710	CD4-positive, alpha-beta T cell activation	6/55	102/18723	5.26305e-07	1.45523e-05	8.05384e-06	XCL1/CD55/IL2/IL4/IFNG/NFKBID	6
GO:0072677	GO:0072677	eosinophil migration	4/55	23/18723	5.66063e-07	1.54584e-05	8.55531e-06	IL4/CCL1/CCL3/CCL4	4
GO:0002824	GO:0002824	positive regulation of adaptive immune response based on somatic recombination of immune receptors built from immunoglobulin superfamily domains	6/55	107/18723	6.98481e-07	1.8842e-05	1.04279e-05	XCL1/CD55/IL2/IL4/TNF/NFKBID	6
GO:0002449	GO:0002449	lymphocyte mediated immunity	9/55	350/18723	7.49882e-07	1.99848e-05	1.10604e-05	PRDX1/XCL1/CD55/IL2/IL4/TNF/CD40LG/CRTAM/GZMB	9
GO:1901623	GO:1901623	regulation of lymphocyte chemotaxis	4/55	25/18723	8.05143e-07	2.09708e-05	1.16061e-05	XCL2/XCL1/CCL3/CCL4	4
GO:2000351	GO:2000351	regulation of endothelial cell apoptotic process	5/55	59/18723	8.05839e-07	2.09708e-05	1.16061e-05	IL13/IL4/TNF/CD40LG/RGCC	5
GO:0002712	GO:0002712	regulation of B cell mediated immunity	5/55	60/18723	8.77142e-07	2.23016e-05	1.23426e-05	XCL1/CD55/IL2/IL4/TNF	5
GO:0002889	GO:0002889	regulation of immunoglobulin mediated immune response	5/55	60/18723	8.77142e-07	2.23016e-05	1.23426e-05	XCL1/CD55/IL2/IL4/TNF	5
GO:0002821	GO:0002821	positive regulation of adaptive immune response	6/55	112/18723	9.14314e-07	2.29825e-05	1.27195e-05	XCL1/CD55/IL2/IL4/TNF/NFKBID	6
GO:2000401	GO:2000401	regulation of lymphocyte migration	5/55	61/18723	9.53334e-07	2.36787e-05	1.31047e-05	XCL2/XCL1/CD200/CCL3/CCL4	5
GO:0002708	GO:0002708	positive regulation of lymphocyte mediated immunity	6/55	113/18723	9.63418e-07	2.36787e-05	1.31047e-05	XCL1/CD55/IL2/IL4/TNF/CRTAM	6
GO:0019221	GO:0019221	cytokine-mediated signaling pathway	10/55	472/18723	9.97702e-07	2.42518e-05	1.34219e-05	XCL2/XCL1/TNF/HSP90AB1/BIRC3/IFNG/NFKBIA/CCL1/CCL3/CCL4	10
GO:0050900	GO:0050900	leukocyte migration	9/55	369/18723	1.16285e-06	2.79589e-05	1.54736e-05	XCL2/XCL1/CD200/IL4/TNF/CRTAM/CCL1/CCL3/CCL4	9
GO:0002702	GO:0002702	positive regulation of production of molecular mediator of immune response	6/55	117/18723	1.18193e-06	2.81122e-05	1.55585e-05	XCL1/CD55/IL2/IL13/IL4/NR4A3	6
GO:0002695	GO:0002695	negative regulation of leukocyte activation	7/55	187/18723	1.19938e-06	2.82236e-05	1.56201e-05	XCL1/CD200/IL2/IL4/CRTAM/PRNP/SDC4	7
GO:0048247	GO:0048247	lymphocyte chemotaxis	5/55	64/18723	1.21367e-06	2.82594e-05	1.56399e-05	XCL2/XCL1/CCL1/CCL3/CCL4	5
GO:0002366	GO:0002366	leukocyte activation involved in immune response	8/55	275/18723	1.31033e-06	2.93121e-05	1.62225e-05	IL2/IL13/IL4/CD40LG/NR4A3/IFNG/CCL3/NFKBID	8
GO:0038034	GO:0038034	signal transduction in absence of ligand	5/55	65/18723	1.31189e-06	2.93121e-05	1.62225e-05	IL2/CSF2/IL4/TNF/BCL2A1	5
GO:0072577	GO:0072577	endothelial cell apoptotic process	5/55	65/18723	1.31189e-06	2.93121e-05	1.62225e-05	IL13/IL4/TNF/CD40LG/RGCC	5
GO:0097192	GO:0097192	extrinsic apoptotic signaling pathway in absence of ligand	5/55	65/18723	1.31189e-06	2.93121e-05	1.62225e-05	IL2/CSF2/IL4/TNF/BCL2A1	5
GO:0031349	GO:0031349	positive regulation of defense response	8/55	278/18723	1.42114e-06	3.14356e-05	1.73977e-05	PTGS2/IL2/TNF/CRTAM/IFNG/NFKBIA/CCL1/CCL3	8
GO:1904019	GO:1904019	epithelial cell apoptotic process	6/55	121/18723	1.43942e-06	3.15248e-05	1.74471e-05	IL13/IL4/TNF/CD40LG/RGCC/ZFP36L1	6
GO:0002263	GO:0002263	cell activation involved in immune response	8/55	279/18723	1.45981e-06	3.16578e-05	1.75207e-05	IL2/IL13/IL4/CD40LG/NR4A3/IFNG/CCL3/NFKBID	8
GO:0002688	GO:0002688	regulation of leukocyte chemotaxis	6/55	122/18723	1.51048e-06	3.18669e-05	1.76365e-05	XCL2/XCL1/IL4/CCL1/CCL3/CCL4	6
GO:0050868	GO:0050868	negative regulation of T cell activation	6/55	122/18723	1.51048e-06	3.18669e-05	1.76365e-05	XCL1/IL2/IL4/CRTAM/PRNP/SDC4	6
GO:0030099	GO:0030099	myeloid cell differentiation	9/55	381/18723	1.51468e-06	3.18669e-05	1.76365e-05	CSF2/IL4/TNF/MYC/IFNG/NFKBIA/CCL3/LIF/ZFP36L1	9
GO:0046635	GO:0046635	positive regulation of alpha-beta T cell activation	5/55	67/18723	1.52708e-06	3.18669e-05	1.76365e-05	XCL1/CD55/IFNG/HSPH1/NFKBID	5
GO:0022408	GO:0022408	negative regulation of cell-cell adhesion	7/55	196/18723	1.64191e-06	3.39431e-05	1.87855e-05	XCL1/IL2/IL4/CRTAM/RGCC/PRNP/SDC4	7
GO:0071621	GO:0071621	granulocyte chemotaxis	6/55	125/18723	1.74105e-06	3.56592e-05	1.97352e-05	XCL2/XCL1/IL4/CCL1/CCL3/CCL4	6
GO:0002548	GO:0002548	monocyte chemotaxis	5/55	70/18723	1.90101e-06	3.85782e-05	2.13507e-05	XCL2/XCL1/CCL1/CCL3/CCL4	5
GO:0050866	GO:0050866	negative regulation of cell activation	7/55	210/18723	2.59763e-06	5.20313e-05	2.87963e-05	XCL1/CD200/IL2/IL4/CRTAM/PRNP/SDC4	7
GO:0002705	GO:0002705	positive regulation of leukocyte mediated immunity	6/55	134/18723	2.61098e-06	5.20313e-05	2.87963e-05	XCL1/CD55/IL2/IL4/TNF/CRTAM	6
GO:0035747	GO:0035747	natural killer cell chemotaxis	3/55	10/18723	2.83673e-06	5.60255e-05	3.10068e-05	XCL1/CCL3/CCL4	3
GO:0050671	GO:0050671	positive regulation of lymphocyte proliferation	6/55	137/18723	2.96938e-06	5.81262e-05	3.21694e-05	XCL1/CD55/IL2/IL13/IL4/CD40LG	6
GO:0002440	GO:0002440	production of molecular mediator of immune response	8/55	308/18723	3.04614e-06	5.91059e-05	3.27116e-05	XCL1/CD55/IL2/IL13/IL4/TNF/CD40LG/NR4A3	8
GO:0032946	GO:0032946	positive regulation of mononuclear cell proliferation	6/55	138/18723	3.09739e-06	5.95775e-05	3.29726e-05	XCL1/CD55/IL2/IL13/IL4/CD40LG	6
GO:2000403	GO:2000403	positive regulation of lymphocyte migration	4/55	35/18723	3.26075e-06	6.21791e-05	3.44124e-05	XCL2/XCL1/CCL3/CCL4	4
GO:0050921	GO:0050921	positive regulation of chemotaxis	6/55	141/18723	3.50866e-06	6.56867e-05	3.63537e-05	XCL2/XCL1/IL4/CCL1/CCL3/CCL4	6
GO:1903038	GO:1903038	negative regulation of leukocyte cell-cell adhesion	6/55	141/18723	3.50866e-06	6.56867e-05	3.63537e-05	XCL1/IL2/IL4/CRTAM/PRNP/SDC4	6
GO:0097529	GO:0097529	myeloid leukocyte migration	7/55	220/18723	3.53378e-06	6.56867e-05	3.63537e-05	XCL2/XCL1/CD200/IL4/CCL1/CCL3/CCL4	7
GO:0038061	GO:0038061	NIK/NF-kappaB signaling	6/55	143/18723	3.80676e-06	7.01712e-05	3.88356e-05	PRDX1/REL/TNF/BIRC3/NFKBIA/TNFSF14	6
GO:0002703	GO:0002703	regulation of leukocyte mediated immunity	7/55	226/18723	4.21983e-06	7.71428e-05	4.26939e-05	XCL1/CD55/IL2/IL13/IL4/TNF/CRTAM	7
GO:0050672	GO:0050672	negative regulation of lymphocyte proliferation	5/55	83/18723	4.43035e-06	8.03274e-05	4.44564e-05	XCL1/IL2/CRTAM/PRNP/SDC4	5
GO:0097530	GO:0097530	granulocyte migration	6/55	148/18723	4.64314e-06	8.35009e-05	4.62128e-05	XCL2/XCL1/IL4/CCL1/CCL3/CCL4	6
GO:0032945	GO:0032945	negative regulation of mononuclear cell proliferation	5/55	84/18723	4.70028e-06	8.3847e-05	4.64043e-05	XCL1/IL2/CRTAM/PRNP/SDC4	5
GO:0070665	GO:0070665	positive regulation of leukocyte proliferation	6/55	150/18723	5.01695e-06	8.87799e-05	4.91344e-05	XCL1/CD55/IL2/IL13/IL4/CD40LG	6
GO:2000516	GO:2000516	positive regulation of CD4-positive, alpha-beta T cell activation	4/55	39/18723	5.07778e-06	8.91433e-05	4.93355e-05	XCL1/CD55/IFNG/NFKBID	4
GO:0002714	GO:0002714	positive regulation of B cell mediated immunity	4/55	40/18723	5.6297e-06	9.65341e-05	5.34259e-05	XCL1/IL2/IL4/TNF	4
GO:0002891	GO:0002891	positive regulation of immunoglobulin mediated immune response	4/55	40/18723	5.6297e-06	9.65341e-05	5.34259e-05	XCL1/IL2/IL4/TNF	4
GO:0045429	GO:0045429	positive regulation of nitric oxide biosynthetic process	4/55	40/18723	5.6297e-06	9.65341e-05	5.34259e-05	PTGS2/TNF/HSP90AB1/IFNG	4
GO:0070098	GO:0070098	chemokine-mediated signaling pathway	5/55	88/18723	5.91168e-06	0.00010059	5.56703e-05	XCL2/XCL1/CCL1/CCL3/CCL4	5
GO:0032733	GO:0032733	positive regulation of interleukin-10 production	4/55	41/18723	6.22475e-06	0.000104312	5.77303e-05	XCL1/IL13/IL4/CD40LG	4
GO:1904407	GO:1904407	positive regulation of nitric oxide metabolic process	4/55	41/18723	6.22475e-06	0.000104312	5.77303e-05	PTGS2/TNF/HSP90AB1/IFNG	4
GO:0051250	GO:0051250	negative regulation of lymphocyte activation	6/55	157/18723	6.52299e-06	0.000108184	5.98736e-05	XCL1/IL2/IL4/CRTAM/PRNP/SDC4	6
GO:0045638	GO:0045638	negative regulation of myeloid cell differentiation	5/55	90/18723	6.60257e-06	0.000108184	5.98736e-05	IL4/MYC/NFKBIA/CCL3/ZFP36L1	5
GO:0070664	GO:0070664	negative regulation of leukocyte proliferation	5/55	90/18723	6.60257e-06	0.000108184	5.98736e-05	XCL1/IL2/CRTAM/PRNP/SDC4	5
GO:0002275	GO:0002275	myeloid cell activation involved in immune response	5/55	91/18723	6.97091e-06	0.00011338	6.2749e-05	IL13/IL4/NR4A3/IFNG/CCL3	5
GO:0033674	GO:0033674	positive regulation of kinase activity	9/55	467/18723	7.94258e-06	0.000128241	7.09736e-05	AREG/IL2/IL4/TNF/HSP90AB1/IFNG/RGCC/PRNP/SDC4	9
GO:0032620	GO:0032620	interleukin-17 production	4/55	44/18723	8.28984e-06	0.000131922	7.30109e-05	IL2/IFNG/CCL1/PRNP	4
GO:0032660	GO:0032660	regulation of interleukin-17 production	4/55	44/18723	8.28984e-06	0.000131922	7.30109e-05	IL2/IFNG/CCL1/PRNP	4
GO:0002718	GO:0002718	regulation of cytokine production involved in immune response	5/55	96/18723	9.06101e-06	0.000143164	7.92328e-05	XCL1/CD55/IL4/TNF/NR4A3	5
GO:1990868	GO:1990868	response to chemokine	5/55	97/18723	9.53223e-06	0.000147699	8.17428e-05	XCL2/XCL1/CCL1/CCL3/CCL4	5
GO:1990869	GO:1990869	cellular response to chemokine	5/55	97/18723	9.53223e-06	0.000147699	8.17428e-05	XCL2/XCL1/CCL1/CCL3/CCL4	5
GO:0002706	GO:0002706	regulation of lymphocyte mediated immunity	6/55	168/18723	9.61515e-06	0.000147699	8.17428e-05	XCL1/CD55/IL2/IL4/TNF/CRTAM	6
GO:0002822	GO:0002822	regulation of adaptive immune response based on somatic recombination of immune receptors built from immunoglobulin superfamily domains	6/55	168/18723	9.61515e-06	0.000147699	8.17428e-05	XCL1/CD55/IL2/IL4/TNF/NFKBID	6
GO:0030217	GO:0030217	T cell differentiation	7/55	257/18723	9.78841e-06	0.000149324	8.26419e-05	IL2/IL4/TNFSF8/CRTAM/IFNG/NFKBID/ZFP36L1	7
GO:0002367	GO:0002367	cytokine production involved in immune response	5/55	98/18723	1.00224e-05	0.000151846	8.40378e-05	XCL1/CD55/IL4/TNF/NR4A3	5
GO:0042102	GO:0042102	positive regulation of T cell proliferation	5/55	101/18723	1.1612e-05	0.000174733	9.67044e-05	XCL1/CD55/IL2/IL4/CD40LG	5
GO:0045619	GO:0045619	regulation of lymphocyte differentiation	6/55	174/18723	1.17466e-05	0.000175564	9.7164e-05	IL2/IL4/CRTAM/IFNG/NFKBID/ZFP36L1	6
GO:0030098	GO:0030098	lymphocyte differentiation	8/55	374/18723	1.26169e-05	0.000187306	0.000103663	IL2/IL4/CD40LG/TNFSF8/CRTAM/IFNG/NFKBID/ZFP36L1	8
GO:0030593	GO:0030593	neutrophil chemotaxis	5/55	103/18723	1.27766e-05	0.000188412	0.000104275	XCL2/XCL1/CCL1/CCL3/CCL4	5
GO:0002639	GO:0002639	positive regulation of immunoglobulin production	4/55	50/18723	1.38811e-05	0.000203344	0.000112539	XCL1/IL2/IL13/IL4	4
GO:0043370	GO:0043370	regulation of CD4-positive, alpha-beta T cell differentiation	4/55	51/18723	1.50297e-05	0.000218721	0.000121049	IL2/IL4/IFNG/NFKBID	4
GO:1903829	GO:1903829	positive regulation of cellular protein localization	7/55	276/18723	1.55398e-05	0.000224667	0.00012434	PTGS2/TNF/HSP90AB1/IFNG/GZMB/PRNP/LIF	7
GO:0002819	GO:0002819	regulation of adaptive immune response	6/55	183/18723	1.56468e-05	0.000224745	0.000124383	XCL1/CD55/IL2/IL4/TNF/NFKBID	6
GO:0045860	GO:0045860	positive regulation of protein kinase activity	8/55	386/18723	1.58482e-05	0.000226169	0.000125171	AREG/IL4/TNF/HSP90AB1/IFNG/RGCC/PRNP/SDC4	8
GO:0033138	GO:0033138	positive regulation of peptidyl-serine phosphorylation	5/55	108/18723	1.60889e-05	0.000228133	0.000126258	PTGS2/TNF/HSP90AB1/IFNG/LIF	5
GO:0002698	GO:0002698	negative regulation of immune effector process	5/55	110/18723	1.7587e-05	0.000247787	0.000137135	XCL1/CD55/IL2/IL4/TNF	5
GO:0002823	GO:0002823	negative regulation of adaptive immune response based on somatic recombination of immune receptors built from immunoglobulin superfamily domains	4/55	54/18723	1.88964e-05	0.000263677	0.000145929	XCL1/CD55/IL2/IL4	4
GO:0032609	GO:0032609	interferon-gamma production	5/55	112/18723	1.91917e-05	0.000263677	0.000145929	XCL1/IL2/TNF/CRTAM/PRNP	5
GO:0032649	GO:0032649	regulation of interferon-gamma production	5/55	112/18723	1.91917e-05	0.000263677	0.000145929	XCL1/IL2/TNF/CRTAM/PRNP	5
GO:0046632	GO:0046632	alpha-beta T cell differentiation	5/55	112/18723	1.91917e-05	0.000263677	0.000145929	IL2/IL4/TNFSF8/IFNG/NFKBID	5
GO:0071347	GO:0071347	cellular response to interleukin-1	5/55	113/18723	2.00356e-05	0.000273572	0.000151406	XCL2/XCL1/CCL1/CCL3/CCL4	5
GO:1900221	GO:1900221	regulation of amyloid-beta clearance	3/55	19/18723	2.24811e-05	0.000303221	0.000167815	IL4/TNF/IFNG	3
GO:2000319	GO:2000319	regulation of T-helper 17 cell differentiation	3/55	19/18723	2.24811e-05	0.000303221	0.000167815	IL2/IL4/NFKBID	3
GO:0002763	GO:0002763	positive regulation of myeloid leukocyte differentiation	4/55	58/18723	2.51309e-05	0.000336907	0.000186458	TNF/IFNG/LIF/ZFP36L1	4
GO:0033005	GO:0033005	positive regulation of mast cell activation	3/55	20/18723	2.63934e-05	0.0003517	0.000194645	IL13/IL4/NR4A3	3
GO:0002820	GO:0002820	negative regulation of adaptive immune response	4/55	59/18723	2.69e-05	0.000356304	0.000197193	XCL1/CD55/IL2/IL4	4
GO:0007162	GO:0007162	negative regulation of cell adhesion	7/55	303/18723	2.82982e-05	0.000370388	0.000204988	XCL1/IL2/IL4/CRTAM/RGCC/PRNP/SDC4	7
GO:0051222	GO:0051222	positive regulation of protein transport	7/55	303/18723	2.82982e-05	0.000370388	0.000204988	PTGS2/IL13/TNF/HSP90AB1/IFNG/GZMB/PRNP	7
GO:0031663	GO:0031663	lipopolysaccharide-mediated signaling pathway	4/55	60/18723	2.87588e-05	0.000374203	0.000207099	CD55/TNF/NFKBIA/CCL3	4
GO:1990266	GO:1990266	neutrophil migration	5/55	122/18723	2.9002e-05	0.00037516	0.000207629	XCL2/XCL1/CCL1/CCL3/CCL4	5
GO:0043030	GO:0043030	regulation of macrophage activation	4/55	61/18723	3.07101e-05	0.000394946	0.000218579	CD200/IL13/IL4/CCL3	4
GO:0016064	GO:0016064	immunoglobulin mediated immune response	6/55	207/18723	3.13577e-05	0.000400944	0.000221899	XCL1/CD55/IL2/IL4/TNF/CD40LG	6
GO:1901215	GO:1901215	negative regulation of neuron death	6/55	208/18723	3.22167e-05	0.000409365	0.000226559	REL/NR4A2/CD200/IL13/HSP90AB1/NR4A3	6
GO:0032613	GO:0032613	interleukin-10 production	4/55	62/18723	3.27566e-05	0.000409365	0.000226559	XCL1/IL13/IL4/CD40LG	4
GO:0032653	GO:0032653	regulation of interleukin-10 production	4/55	62/18723	3.27566e-05	0.000409365	0.000226559	XCL1/IL13/IL4/CD40LG	4
GO:0045428	GO:0045428	regulation of nitric oxide biosynthetic process	4/55	62/18723	3.27566e-05	0.000409365	0.000226559	PTGS2/TNF/HSP90AB1/IFNG	4
GO:0019724	GO:0019724	B cell mediated immunity	6/55	210/18723	3.39915e-05	0.000422412	0.00023378	XCL1/CD55/IL2/IL4/TNF/CD40LG	6
GO:0045670	GO:0045670	regulation of osteoclast differentiation	4/55	64/18723	3.71472e-05	0.000456498	0.000252645	IL4/TNF/IFNG/CCL3	4
GO:0080164	GO:0080164	regulation of nitric oxide metabolic process	4/55	64/18723	3.71472e-05	0.000456498	0.000252645	PTGS2/TNF/HSP90AB1/IFNG	4
GO:0007204	GO:0007204	positive regulation of cytosolic calcium ion concentration	7/55	319/18723	3.92711e-05	0.000477295	0.000264155	XCL1/CD55/IL2/IL13/CCL1/CCL3/PRNP	7
GO:1904951	GO:1904951	positive regulation of establishment of protein localization	7/55	319/18723	3.92711e-05	0.000477295	0.000264155	PTGS2/IL13/TNF/HSP90AB1/IFNG/GZMB/PRNP	7
GO:0002720	GO:0002720	positive regulation of cytokine production involved in immune response	4/55	65/18723	3.94971e-05	0.000477419	0.000264223	XCL1/CD55/IL4/NR4A3	4
GO:0002377	GO:0002377	immunoglobulin production	6/55	216/18723	3.97928e-05	0.000478378	0.000264754	XCL1/IL2/IL13/IL4/TNF/CD40LG	6
GO:0071636	GO:0071636	positive regulation of transforming growth factor beta production	3/55	23/18723	4.07471e-05	0.0004856	0.000268751	XCL1/PTGS2/CD200	3
GO:0070374	GO:0070374	positive regulation of ERK1 and ERK2 cascade	6/55	217/18723	4.08325e-05	0.0004856	0.000268751	XCL2/XCL1/TNF/CCL1/CCL3/CCL4	6
GO:0072678	GO:0072678	T cell migration	4/55	66/18723	4.19539e-05	0.000496268	0.000274655	XCL2/XCL1/CD200/CCL3	4
GO:0097191	GO:0097191	extrinsic apoptotic signaling pathway	6/55	219/18723	4.29775e-05	0.000505672	0.000279859	IL2/CSF2/IL4/TNF/IFNG/BCL2A1	6
GO:0042130	GO:0042130	negative regulation of T cell proliferation	4/55	67/18723	4.45207e-05	0.000521057	0.000288374	XCL1/CRTAM/PRNP/SDC4	4
GO:0051235	GO:0051235	maintenance of location	7/55	327/18723	4.59468e-05	0.000534917	0.000296045	XCL1/IL13/TNF/HSPA5/SRGN/NFKBIA/CCL3	7
GO:0002726	GO:0002726	positive regulation of T cell cytokine production	3/55	24/18723	4.64713e-05	0.000535388	0.000296305	XCL1/CD55/IL4	3
GO:0051043	GO:0051043	regulation of membrane protein ectodomain proteolysis	3/55	24/18723	4.64713e-05	0.000535388	0.000296305	TNF/IFNG/TIMP1	3
GO:0002294	GO:0002294	CD4-positive, alpha-beta T cell differentiation involved in immune response	4/55	68/18723	4.72005e-05	0.000538183	0.000297852	IL2/IL4/IFNG/NFKBID	4
GO:0046637	GO:0046637	regulation of alpha-beta T cell differentiation	4/55	68/18723	4.72005e-05	0.000538183	0.000297852	IL2/IL4/IFNG/NFKBID	4
GO:0050920	GO:0050920	regulation of chemotaxis	6/55	223/18723	4.75389e-05	0.000539261	0.000298449	XCL2/XCL1/IL4/CCL1/CCL3/CCL4	6
GO:0071214	GO:0071214	cellular response to abiotic stimulus	7/55	331/18723	4.96186e-05	0.000555737	0.000307567	PTGS2/IL13/MYC/HSPA5/TNFSF14/ZFP36L1/TIMP1	7
GO:0104004	GO:0104004	cellular response to environmental stimulus	7/55	331/18723	4.96186e-05	0.000555737	0.000307567	PTGS2/IL13/MYC/HSPA5/TNFSF14/ZFP36L1/TIMP1	7
GO:0002287	GO:0002287	alpha-beta T cell activation involved in immune response	4/55	69/18723	4.99962e-05	0.000555737	0.000307567	IL2/IL4/IFNG/NFKBID	4
GO:0002293	GO:0002293	alpha-beta T cell differentiation involved in immune response	4/55	69/18723	4.99962e-05	0.000555737	0.000307567	IL2/IL4/IFNG/NFKBID	4
GO:2000316	GO:2000316	regulation of T-helper 17 type immune response	3/55	25/18723	5.26984e-05	0.000582285	0.00032226	IL2/IL4/NFKBID	3
GO:0002381	GO:0002381	immunoglobulin production involved in immunoglobulin-mediated immune response	4/55	70/18723	5.29111e-05	0.000582285	0.00032226	XCL1/IL2/IL4/CD40LG	4
GO:0030595	GO:0030595	leukocyte chemotaxis	6/55	230/18723	5.64502e-05	0.000618158	0.000342114	XCL2/XCL1/IL4/CCL1/CCL3/CCL4	6
GO:0062013	GO:0062013	positive regulation of small molecule metabolic process	5/55	143/18723	6.19993e-05	0.00066682	0.000369045	PTGS2/IL4/TNF/NR4A3/IFNG	5
GO:0070555	GO:0070555	response to interleukin-1	5/55	143/18723	6.19993e-05	0.00066682	0.000369045	XCL2/XCL1/CCL1/CCL3/CCL4	5
GO:0032496	GO:0032496	response to lipopolysaccharide	7/55	343/18723	6.21074e-05	0.00066682	0.000369045	PTGS2/CD55/CSF2/IL13/TNF/NFKBIA/CCL3	7
GO:0043299	GO:0043299	leukocyte degranulation	4/55	73/18723	6.24014e-05	0.00066682	0.000369045	IL13/IL4/NR4A3/CCL3	4
GO:0050848	GO:0050848	regulation of calcium-mediated signaling	4/55	73/18723	6.24014e-05	0.00066682	0.000369045	TNF/CCL3/CCL4/PRNP	4
GO:0001890	GO:0001890	placenta development	5/55	144/18723	6.4087e-05	0.000678279	0.000375387	PTGS2/CSF2/HSP90AB1/LIF/ZFP36L1	5
GO:0033135	GO:0033135	regulation of peptidyl-serine phosphorylation	5/55	144/18723	6.4087e-05	0.000678279	0.000375387	PTGS2/TNF/HSP90AB1/IFNG/LIF	5
GO:0009651	GO:0009651	response to salt stress	3/55	27/18723	6.67403e-05	0.000699666	0.000387224	TNF/HSP90AB1/ZFP36L1	3
GO:0036037	GO:0036037	CD8-positive, alpha-beta T cell activation	3/55	27/18723	6.67403e-05	0.000699666	0.000387224	XCL1/TNFSF8/CRTAM	3
GO:0045580	GO:0045580	regulation of T cell differentiation	5/55	146/18723	6.84248e-05	0.000713941	0.000395124	IL2/IL4/CRTAM/IFNG/NFKBID	5
GO:0002292	GO:0002292	T cell differentiation involved in immune response	4/55	75/18723	6.93812e-05	0.000720522	0.000398766	IL2/IL4/IFNG/NFKBID	4
GO:0045861	GO:0045861	negative regulation of proteolysis	7/55	351/18723	7.17828e-05	0.000741979	0.000410641	PTGS2/TNF/HSP90AB1/BIRC3/PRNP/TNFSF14/TIMP1	7
GO:0006887	GO:0006887	exocytosis	7/55	352/18723	7.30744e-05	0.000748359	0.000414172	IL13/IL4/SYTL3/NR4A3/IFNG/CCL3/SDC4	7
GO:0006809	GO:0006809	nitric oxide biosynthetic process	4/55	76/18723	7.30766e-05	0.000748359	0.000414172	PTGS2/TNF/HSP90AB1/IFNG	4
GO:0051480	GO:0051480	regulation of cytosolic calcium ion concentration	7/55	353/18723	7.4385e-05	0.000750007	0.000415084	XCL1/CD55/IL2/IL13/CCL1/CCL3/PRNP	7
GO:0043410	GO:0043410	positive regulation of MAPK cascade	8/55	480/18723	7.43973e-05	0.000750007	0.000415084	XCL2/XCL1/TNF/CCL1/CCL3/CCL4/GADD45B/LIF	8
GO:0010818	GO:0010818	T cell chemotaxis	3/55	28/18723	7.45938e-05	0.000750007	0.000415084	XCL2/XCL1/CCL3	3
GO:0031342	GO:0031342	negative regulation of cell killing	3/55	28/18723	7.45938e-05	0.000750007	0.000415084	IL13/IL4/HSP90AB1	3
GO:0002460	GO:0002460	adaptive immune response based on somatic recombination of immune receptors built from immunoglobulin superfamily domains	7/55	356/18723	7.84327e-05	0.000785037	0.000434471	XCL1/CD55/IL2/IL4/TNF/CD40LG/NFKBID	7
GO:0043154	GO:0043154	negative regulation of cysteine-type endopeptidase activity involved in apoptotic process	4/55	78/18723	8.08948e-05	0.000806033	0.000446092	PTGS2/TNF/BIRC3/TNFSF14	4
GO:0051402	GO:0051402	neuron apoptotic process	6/55	246/18723	8.18809e-05	0.000808574	0.000447498	NR4A2/TNF/HSP90AB1/HSPA5/CCL3/PRNP	6
GO:0071216	GO:0071216	cellular response to biotic stimulus	6/55	246/18723	8.18809e-05	0.000808574	0.000447498	CD55/CSF2/TNF/HSPA5/NFKBIA/CCL3	6
GO:0072539	GO:0072539	T-helper 17 cell differentiation	3/55	29/18723	8.30279e-05	0.000816256	0.000451749	IL2/IL4/NFKBID	3
GO:0030856	GO:0030856	regulation of epithelial cell differentiation	5/55	154/18723	8.80867e-05	0.000862158	0.000477153	IL13/TNF/IFNG/LIF/ZFP36L1	5
GO:0002237	GO:0002237	response to molecule of bacterial origin	7/55	363/18723	8.85817e-05	0.000863184	0.000477721	PTGS2/CD55/CSF2/IL13/TNF/NFKBIA/CCL3	7
GO:0010951	GO:0010951	negative regulation of endopeptidase activity	6/55	252/18723	9.34903e-05	0.000905471	0.000501124	PTGS2/TNF/BIRC3/PRNP/TNFSF14/TIMP1	6
GO:0046209	GO:0046209	nitric oxide metabolic process	4/55	81/18723	9.374e-05	0.000905471	0.000501124	PTGS2/TNF/HSP90AB1/IFNG	4
GO:2001057	GO:2001057	reactive nitrogen species metabolic process	4/55	82/18723	9.83332e-05	0.000945709	0.000523394	PTGS2/TNF/HSP90AB1/IFNG	4
GO:0043547	GO:0043547	positive regulation of GTPase activity	6/55	255/18723	9.97674e-05	0.00095123	0.000526449	XCL2/XCL1/RGS16/CCL1/CCL3/CCL4	6
GO:0051924	GO:0051924	regulation of calcium ion transport	6/55	255/18723	9.97674e-05	0.00095123	0.000526449	XCL1/PTGS2/IL13/CCL3/CCL4/PRNP	6
GO:0043367	GO:0043367	CD4-positive, alpha-beta T cell differentiation	4/55	83/18723	0.000103088	0.00097867	0.000541636	IL2/IL4/IFNG/NFKBID	4
GO:0090316	GO:0090316	positive regulation of intracellular protein transport	5/55	160/18723	0.000105486	0.000997162	0.00055187	PTGS2/HSP90AB1/IFNG/GZMB/PRNP	5
GO:0006970	GO:0006970	response to osmotic stress	4/55	84/18723	0.000108007	0.00101665	0.000562653	PTGS2/TNF/HSP90AB1/ZFP36L1	4
GO:0050850	GO:0050850	positive regulation of calcium-mediated signaling	3/55	32/18723	0.000112002	0.00104536	0.000578542	TNF/CCL3/CCL4	3
GO:2000515	GO:2000515	negative regulation of CD4-positive, alpha-beta T cell activation	3/55	32/18723	0.000112002	0.00104536	0.000578542	XCL1/IL2/IL4	3
GO:0010466	GO:0010466	negative regulation of peptidase activity	6/55	262/18723	0.000115724	0.00107556	0.000595256	PTGS2/TNF/BIRC3/PRNP/TNFSF14/TIMP1	6
GO:0045921	GO:0045921	positive regulation of exocytosis	4/55	86/18723	0.000118354	0.00109083	0.000603709	IL13/IL4/IFNG/SDC4	4
GO:2000117	GO:2000117	negative regulation of cysteine-type endopeptidase activity	4/55	86/18723	0.000118354	0.00109083	0.000603709	PTGS2/TNF/BIRC3/TNFSF14	4
GO:0071353	GO:0071353	cellular response to interleukin-4	3/55	33/18723	0.000122947	0.00112846	0.000624533	XCL1/HSP90AB1/HSPA5	3
GO:1900182	GO:1900182	positive regulation of protein localization to nucleus	4/55	87/18723	0.000123789	0.00113149	0.000626212	PTGS2/HSP90AB1/IFNG/LIF	4
GO:0045582	GO:0045582	positive regulation of T cell differentiation	4/55	91/18723	0.000147349	0.0013413	0.000742329	IL2/IL4/IFNG/NFKBID	4
GO:0001659	GO:0001659	temperature homeostasis	5/55	174/18723	0.000156338	0.00141729	0.000784386	PTGS2/IL13/IL4/TNF/KDM6B	5
GO:0030224	GO:0030224	monocyte differentiation	3/55	36/18723	0.000159894	0.00143774	0.000795706	CSF2/MYC/ZFP36L1	3
GO:0070670	GO:0070670	response to interleukin-4	3/55	36/18723	0.000159894	0.00143774	0.000795706	XCL1/HSP90AB1/HSPA5	3
GO:0030316	GO:0030316	osteoclast differentiation	4/55	94/18723	0.000167032	0.00149585	0.000827863	IL4/TNF/IFNG/CCL3	4
GO:0002369	GO:0002369	T cell cytokine production	3/55	37/18723	0.000173641	0.00154254	0.000853706	XCL1/CD55/IL4	3
GO:0002724	GO:0002724	regulation of T cell cytokine production	3/55	37/18723	0.000173641	0.00154254	0.000853706	XCL1/CD55/IL4	3
GO:0010959	GO:0010959	regulation of metal ion transport	7/55	406/18723	0.000177129	0.00156724	0.000867375	XCL1/PTGS2/IL13/IFNG/CCL3/CCL4/PRNP	7
GO:0043409	GO:0043409	negative regulation of MAPK cascade	5/55	180/18723	0.000183122	0.00160741	0.000889603	DUSP2/DUSP4/MYC/DUSP6/LIF	5
GO:0048660	GO:0048660	regulation of smooth muscle cell proliferation	5/55	180/18723	0.000183122	0.00160741	0.000889603	PTGS2/IL13/TNF/NR4A3/IFNG	5
GO:0072538	GO:0072538	T-helper 17 type immune response	3/55	38/18723	0.000188133	0.00163557	0.000905189	IL2/IL4/NFKBID	3
GO:0097242	GO:0097242	amyloid-beta clearance	3/55	38/18723	0.000188133	0.00163557	0.000905189	IL4/TNF/IFNG	3
GO:1901216	GO:1901216	positive regulation of neuron death	4/55	97/18723	0.000188549	0.00163557	0.000905189	TNF/IFNG/CCL3/PRNP	4
GO:0048659	GO:0048659	smooth muscle cell proliferation	5/55	184/18723	0.000202836	0.00174194	0.000964058	PTGS2/IL13/TNF/NR4A3/IFNG	5
GO:0045622	GO:0045622	regulation of T-helper cell differentiation	3/55	39/18723	0.000203387	0.00174194	0.000964058	IL2/IL4/NFKBID	3
GO:0002444	GO:0002444	myeloid leukocyte mediated immunity	4/55	99/18723	0.000203961	0.00174194	0.000964058	IL13/IL4/NR4A3/CCL3	4
GO:0042100	GO:0042100	B cell proliferation	4/55	99/18723	0.000203961	0.00174194	0.000964058	IL2/IL13/IL4/CD40LG	4
GO:1902106	GO:1902106	negative regulation of leukocyte differentiation	4/55	102/18723	0.000228755	0.00194617	0.00107709	IL2/IL4/MYC/CCL3	4
GO:0042307	GO:0042307	positive regulation of protein import into nucleus	3/55	41/18723	0.000236253	0.00199737	0.00110543	PTGS2/HSP90AB1/IFNG	3
GO:0045639	GO:0045639	positive regulation of myeloid cell differentiation	4/55	103/18723	0.000237481	0.00199737	0.00110543	TNF/IFNG/LIF/ZFP36L1	4
GO:0046425	GO:0046425	regulation of receptor signaling pathway via JAK-STAT	4/55	103/18723	0.000237481	0.00199737	0.00110543	IL4/TNF/IFNG/LIF	4
GO:0045621	GO:0045621	positive regulation of lymphocyte differentiation	4/55	104/18723	0.000246445	0.00205712	0.00113849	IL2/IL4/IFNG/NFKBID	4
GO:0048661	GO:0048661	positive regulation of smooth muscle cell proliferation	4/55	104/18723	0.000246445	0.00205712	0.00113849	PTGS2/IL13/TNF/NR4A3	4
GO:0030890	GO:0030890	positive regulation of B cell proliferation	3/55	42/18723	0.000253898	0.00209561	0.00115979	IL2/IL13/IL4	3
GO:0033003	GO:0033003	regulation of mast cell activation	3/55	42/18723	0.000253898	0.00209561	0.00115979	IL13/IL4/NR4A3	3
GO:2000404	GO:2000404	regulation of T cell migration	3/55	42/18723	0.000253898	0.00209561	0.00115979	XCL2/XCL1/CD200	3
GO:0052548	GO:0052548	regulation of endopeptidase activity	7/55	432/18723	0.00025877	0.00212364	0.00117531	PTGS2/TNF/MYC/BIRC3/PRNP/TNFSF14/TIMP1	7
GO:0002285	GO:0002285	lymphocyte activation involved in immune response	5/55	194/18723	0.000259215	0.00212364	0.00117531	IL2/IL4/CD40LG/IFNG/NFKBID	5
GO:1903707	GO:1903707	negative regulation of hemopoiesis	4/55	106/18723	0.000265098	0.00215587	0.00119315	IL2/IL4/MYC/CCL3	4
GO:1905477	GO:1905477	positive regulation of protein localization to membrane	4/55	106/18723	0.000265098	0.00215587	0.00119315	TNF/IFNG/GZMB/PRNP	4
GO:0006509	GO:0006509	membrane protein ectodomain proteolysis	3/55	43/18723	0.000272374	0.00219088	0.00121252	TNF/IFNG/TIMP1	3
GO:0046636	GO:0046636	negative regulation of alpha-beta T cell activation	3/55	43/18723	0.000272374	0.00219088	0.00121252	XCL1/IL2/IL4	3
GO:1904591	GO:1904591	positive regulation of protein import	3/55	43/18723	0.000272374	0.00219088	0.00121252	PTGS2/HSP90AB1/IFNG	3
GO:0060326	GO:0060326	cell chemotaxis	6/55	310/18723	0.000287681	0.00230562	0.00127602	XCL2/XCL1/IL4/CCL1/CCL3/CCL4	6
GO:0051090	GO:0051090	regulation of DNA-binding transcription factor activity	7/55	440/18723	0.000289237	0.00230972	0.00127829	XCL1/CD200/TNF/CD40LG/RGCC/NFKBIA/PRNP	7
GO:0046006	GO:0046006	regulation of activated T cell proliferation	3/55	44/18723	0.000291697	0.00232099	0.00128453	IL2/CRTAM/PRNP	3
GO:0051054	GO:0051054	positive regulation of DNA metabolic process	5/55	201/18723	0.000305265	0.00242024	0.00133946	IL2/IL4/HSP90AB1/MYC/RGCC	5
GO:0032388	GO:0032388	positive regulation of intracellular transport	5/55	202/18723	0.000312319	0.00246732	0.00136552	PTGS2/HSP90AB1/IFNG/GZMB/PRNP	5
GO:0006979	GO:0006979	response to oxidative stress	7/55	446/18723	0.000313933	0.00247125	0.00136769	PRDX1/PTGS2/NR4A2/AREG/NR4A3/KDM6B/PRNP	7
GO:0006874	GO:0006874	cellular calcium ion homeostasis	7/55	448/18723	0.000322533	0.00252994	0.00140017	XCL1/CD55/IL2/IL13/CCL1/CCL3/PRNP	7
GO:1901222	GO:1901222	regulation of NIK/NF-kappaB signaling	4/55	112/18723	0.000327149	0.00255708	0.00141519	PRDX1/TNF/NFKBIA/TNFSF14	4
GO:0031294	GO:0031294	lymphocyte costimulation	3/55	46/18723	0.000332952	0.00259327	0.00143522	IL4/CD40LG/TNFSF14	3
GO:0002286	GO:0002286	T cell activation involved in immune response	4/55	114/18723	0.000349965	0.00270672	0.00149801	IL2/IL4/IFNG/NFKBID	4
GO:1904892	GO:1904892	regulation of receptor signaling pathway via STAT	4/55	114/18723	0.000349965	0.00270672	0.00149801	IL4/TNF/IFNG/LIF	4
GO:0050798	GO:0050798	activated T cell proliferation	3/55	47/18723	0.000354915	0.00273544	0.00151391	IL2/CRTAM/PRNP	3
GO:0043281	GO:0043281	regulation of cysteine-type endopeptidase activity involved in apoptotic process	5/55	209/18723	0.000365224	0.00279542	0.0015471	PTGS2/TNF/MYC/BIRC3/TNFSF14	5
GO:0071222	GO:0071222	cellular response to lipopolysaccharide	5/55	209/18723	0.000365224	0.00279542	0.0015471	CD55/CSF2/TNF/NFKBIA/CCL3	5
GO:0042368	GO:0042368	vitamin D biosynthetic process	2/55	10/18723	0.000375563	0.00282629	0.00156418	TNF/IFNG	2
GO:0045348	GO:0045348	positive regulation of MHC class II biosynthetic process	2/55	10/18723	0.000375563	0.00282629	0.00156418	IL4/IFNG	2
GO:0071803	GO:0071803	positive regulation of podosome assembly	2/55	10/18723	0.000375563	0.00282629	0.00156418	CSF2/TNF	2
GO:0002673	GO:0002673	regulation of acute inflammatory response	3/55	48/18723	0.000377791	0.00282629	0.00156418	PTGS2/IL4/TNF	3
GO:0043303	GO:0043303	mast cell degranulation	3/55	48/18723	0.000377791	0.00282629	0.00156418	IL13/IL4/NR4A3	3
GO:1902003	GO:1902003	regulation of amyloid-beta formation	3/55	48/18723	0.000377791	0.00282629	0.00156418	TNF/IFNG/PRNP	3
GO:0055074	GO:0055074	calcium ion homeostasis	7/55	460/18723	0.000378201	0.00282629	0.00156418	XCL1/CD55/IL2/IL13/CCL1/CCL3/PRNP	7
GO:0052547	GO:0052547	regulation of peptidase activity	7/55	461/18723	0.000383168	0.00285376	0.00157939	PTGS2/TNF/MYC/BIRC3/PRNP/TNFSF14/TIMP1	7
GO:0043523	GO:0043523	regulation of neuron apoptotic process	5/55	212/18723	0.000389866	0.0028939	0.0016016	NR4A2/TNF/HSP90AB1/CCL3/PRNP	5
GO:0002204	GO:0002204	somatic recombination of immunoglobulin genes involved in immune response	3/55	49/18723	0.000401595	0.00292213	0.00161723	IL2/IL4/CD40LG	3
GO:0002208	GO:0002208	somatic diversification of immunoglobulins involved in immune response	3/55	49/18723	0.000401595	0.00292213	0.00161723	IL2/IL4/CD40LG	3
GO:0002279	GO:0002279	mast cell activation involved in immune response	3/55	49/18723	0.000401595	0.00292213	0.00161723	IL13/IL4/NR4A3	3
GO:0002762	GO:0002762	negative regulation of myeloid leukocyte differentiation	3/55	49/18723	0.000401595	0.00292213	0.00161723	IL4/MYC/CCL3	3
GO:0030225	GO:0030225	macrophage differentiation	3/55	49/18723	0.000401595	0.00292213	0.00161723	CSF2/IFNG/LIF	3
GO:0045190	GO:0045190	isotype switching	3/55	49/18723	0.000401595	0.00292213	0.00161723	IL2/IL4/CD40LG	3
GO:0051651	GO:0051651	maintenance of location in cell	5/55	214/18723	0.000406979	0.0029516	0.00163354	XCL1/IL13/HSPA5/SRGN/CCL3	5
GO:0002448	GO:0002448	mast cell mediated immunity	3/55	50/18723	0.000426342	0.00308193	0.00170566	IL13/IL4/NR4A3	3
GO:0062197	GO:0062197	cellular response to chemical stress	6/55	337/18723	0.000448663	0.00322908	0.0017871	PRDX1/PTGS2/NR4A2/NR4A3/KDM6B/ZFP36L1	6
GO:0051928	GO:0051928	positive regulation of calcium ion transport	4/55	122/18723	0.000452726	0.00322908	0.0017871	XCL1/IL13/CCL3/CCL4	4
GO:0001660	GO:0001660	fever generation	2/55	11/18723	0.000458156	0.00322908	0.0017871	PTGS2/TNF	2
GO:0030656	GO:0030656	regulation of vitamin metabolic process	2/55	11/18723	0.000458156	0.00322908	0.0017871	TNF/IFNG	2
GO:0031652	GO:0031652	positive regulation of heat generation	2/55	11/18723	0.000458156	0.00322908	0.0017871	PTGS2/TNF	2
GO:1900222	GO:1900222	negative regulation of amyloid-beta clearance	2/55	11/18723	0.000458156	0.00322908	0.0017871	TNF/IFNG	2
GO:2000320	GO:2000320	negative regulation of T-helper 17 cell differentiation	2/55	11/18723	0.000458156	0.00322908	0.0017871	IL2/IL4	2
GO:0001667	GO:0001667	ameboidal-type cell migration	7/55	475/18723	0.000458377	0.00322908	0.0017871	PTGS2/IL4/TNF/IFNG/RGCC/SDC4/TIMP1	7
GO:0071219	GO:0071219	cellular response to molecule of bacterial origin	5/55	221/18723	0.000471383	0.00331016	0.00183198	CD55/CSF2/TNF/NFKBIA/CCL3	5
GO:0001909	GO:0001909	leukocyte mediated cytotoxicity	4/55	124/18723	0.000481449	0.00337014	0.00186517	PRDX1/XCL1/CRTAM/GZMB	4
GO:2001234	GO:2001234	negative regulation of apoptotic signaling pathway	5/55	224/18723	0.000501222	0.00349749	0.00193565	PTGS2/NR4A2/CSF2/IL4/TNF	5
GO:0007566	GO:0007566	embryo implantation	3/55	53/18723	0.000506403	0.00352253	0.00194951	PTGS2/LIF/TIMP1	3
GO:0072503	GO:0072503	cellular divalent inorganic cation homeostasis	7/55	486/18723	0.000525403	0.00364323	0.00201631	XCL1/CD55/IL2/IL13/CCL1/CCL3/PRNP	7
GO:0043087	GO:0043087	regulation of GTPase activity	6/55	348/18723	0.000531521	0.00367414	0.00203342	XCL2/XCL1/RGS16/CCL1/CCL3/CCL4	6
GO:0035739	GO:0035739	CD4-positive, alpha-beta T cell proliferation	2/55	12/18723	0.000548751	0.00374641	0.00207342	XCL1/CD55	2
GO:0071635	GO:0071635	negative regulation of transforming growth factor beta production	2/55	12/18723	0.000548751	0.00374641	0.00207342	IL13/HSP90AB1	2
GO:2000317	GO:2000317	negative regulation of T-helper 17 type immune response	2/55	12/18723	0.000548751	0.00374641	0.00207342	IL2/IL4	2
GO:2000561	GO:2000561	regulation of CD4-positive, alpha-beta T cell proliferation	2/55	12/18723	0.000548751	0.00374641	0.00207342	XCL1/CD55	2
GO:0033157	GO:0033157	regulation of intracellular protein transport	5/55	229/18723	0.000554092	0.00375966	0.00208075	PTGS2/HSP90AB1/IFNG/GZMB/PRNP	5
GO:0045444	GO:0045444	fat cell differentiation	5/55	229/18723	0.000554092	0.00375966	0.00208075	PTGS2/NR4A2/TNF/NR4A3/ZFP36L1	5
GO:1902991	GO:1902991	regulation of amyloid precursor protein catabolic process	3/55	55/18723	0.000564777	0.00382045	0.00211439	TNF/IFNG/PRNP	3
GO:0046683	GO:0046683	response to organophosphorus	4/55	131/18723	0.000592243	0.00399403	0.00221046	PTGS2/AREG/HSPA5/ZFP36L1	4
GO:0002711	GO:0002711	positive regulation of T cell mediated immunity	3/55	56/18723	0.000595508	0.00400384	0.00221589	XCL1/CD55/IL4	3
GO:2000116	GO:2000116	regulation of cysteine-type endopeptidase activity	5/55	235/18723	0.000622955	0.00416686	0.00230611	PTGS2/TNF/MYC/BIRC3/TNFSF14	5
GO:0016447	GO:0016447	somatic recombination of immunoglobulin gene segments	3/55	57/18723	0.00062729	0.00416686	0.00230611	IL2/IL4/CD40LG	3
GO:0033619	GO:0033619	membrane protein proteolysis	3/55	57/18723	0.00062729	0.00416686	0.00230611	TNF/IFNG/TIMP1	3
GO:0034205	GO:0034205	amyloid-beta formation	3/55	57/18723	0.00062729	0.00416686	0.00230611	TNF/IFNG/PRNP	3
GO:0035745	GO:0035745	T-helper 2 cell cytokine production	2/55	13/18723	0.000647303	0.0042237	0.00233757	XCL1/IL4	2
GO:0042362	GO:0042362	fat-soluble vitamin biosynthetic process	2/55	13/18723	0.000647303	0.0042237	0.00233757	TNF/IFNG	2
GO:0048302	GO:0048302	regulation of isotype switching to IgG isotypes	2/55	13/18723	0.000647303	0.0042237	0.00233757	IL2/IL4	2
GO:0071801	GO:0071801	regulation of podosome assembly	2/55	13/18723	0.000647303	0.0042237	0.00233757	CSF2/TNF	2
GO:1902947	GO:1902947	regulation of tau-protein kinase activity	2/55	13/18723	0.000647303	0.0042237	0.00233757	HSP90AB1/IFNG	2
GO:2000551	GO:2000551	regulation of T-helper 2 cell cytokine production	2/55	13/18723	0.000647303	0.0042237	0.00233757	XCL1/IL4	2
GO:0043525	GO:0043525	positive regulation of neuron apoptotic process	3/55	58/18723	0.000660135	0.00429476	0.00237689	TNF/CCL3/PRNP	3
GO:0051403	GO:0051403	stress-activated MAPK cascade	5/55	239/18723	0.00067231	0.00436114	0.00241363	PRDX1/TNF/MYC/GADD45B/ZFP36L1	5
GO:1900180	GO:1900180	regulation of protein localization to nucleus	4/55	136/18723	0.000681723	0.00440927	0.00244027	PTGS2/HSP90AB1/IFNG/LIF	4
GO:0009615	GO:0009615	response to virus	6/55	367/18723	0.000702291	0.00452906	0.00250657	XCL1/IL4/TNF/BIRC3/IFNG/CCL4	6
GO:0042306	GO:0042306	regulation of protein import into nucleus	3/55	60/18723	0.000729074	0.00468811	0.00259459	PTGS2/HSP90AB1/IFNG	3
GO:0031650	GO:0031650	regulation of heat generation	2/55	14/18723	0.000753764	0.00476379	0.00263647	PTGS2/TNF	2
GO:0033008	GO:0033008	positive regulation of mast cell activation involved in immune response	2/55	14/18723	0.000753764	0.00476379	0.00263647	IL13/IL4	2
GO:0043306	GO:0043306	positive regulation of mast cell degranulation	2/55	14/18723	0.000753764	0.00476379	0.00263647	IL13/IL4	2
GO:0043922	GO:0043922	negative regulation by host of viral transcription	2/55	14/18723	0.000753764	0.00476379	0.00263647	CCL3/CCL4	2
GO:0048291	GO:0048291	isotype switching to IgG isotypes	2/55	14/18723	0.000753764	0.00476379	0.00263647	IL2/IL4	2
GO:1901857	GO:1901857	positive regulation of cellular respiration	2/55	14/18723	0.000753764	0.00476379	0.00263647	IL4/IFNG	2
GO:0031098	GO:0031098	stress-activated protein kinase signaling cascade	5/55	247/18723	0.000779758	0.00490406	0.00271411	PRDX1/TNF/MYC/GADD45B/ZFP36L1	5
GO:0030183	GO:0030183	B cell differentiation	4/55	141/18723	0.000780394	0.00490406	0.00271411	IL2/IL4/CD40LG/ZFP36L1	4
GO:0033002	GO:0033002	muscle cell proliferation	5/55	248/18723	0.000794041	0.00495808	0.002744	PTGS2/IL13/TNF/NR4A3/IFNG	5
GO:0097553	GO:0097553	calcium ion transmembrane import into cytosol	4/55	142/18723	0.000801276	0.00495808	0.002744	XCL1/IL13/CCL3/PRNP	4
GO:0032731	GO:0032731	positive regulation of interleukin-1 beta production	3/55	62/18723	0.000802438	0.00495808	0.002744	TNF/IFNG/CCL3	3
GO:0045576	GO:0045576	mast cell activation	3/55	62/18723	0.000802438	0.00495808	0.002744	IL13/IL4/NR4A3	3
GO:0046824	GO:0046824	positive regulation of nucleocytoplasmic transport	3/55	62/18723	0.000802438	0.00495808	0.002744	PTGS2/HSP90AB1/IFNG	3
GO:1903078	GO:1903078	positive regulation of protein localization to plasma membrane	3/55	62/18723	0.000802438	0.00495808	0.002744	TNF/IFNG/PRNP	3
GO:0071560	GO:0071560	cellular response to transforming growth factor beta stimulus	5/55	250/18723	0.000823193	0.00507215	0.00280714	XCL1/IL4/HSP90AB1/HSPA5/ZFP36L1	5
GO:0051346	GO:0051346	negative regulation of hydrolase activity	6/55	379/18723	0.000830308	0.00510178	0.00282353	PTGS2/TNF/BIRC3/PRNP/TNFSF14/TIMP1	6
GO:0031343	GO:0031343	positive regulation of cell killing	3/55	63/18723	0.000840815	0.0051378	0.00284347	XCL1/CRTAM/IFNG	3
GO:1904589	GO:1904589	regulation of protein import	3/55	63/18723	0.000840815	0.0051378	0.00284347	PTGS2/HSP90AB1/IFNG	3
GO:0050678	GO:0050678	regulation of epithelial cell proliferation	6/55	381/18723	0.000853293	0.00519968	0.00287771	AREG/TNF/MYC/NR4A3/RGCC/ZFP36L1	6
GO:0010820	GO:0010820	positive regulation of T cell chemotaxis	2/55	15/18723	0.00086809	0.0052322	0.00289571	XCL2/XCL1	2
GO:0045346	GO:0045346	regulation of MHC class II biosynthetic process	2/55	15/18723	0.00086809	0.0052322	0.00289571	IL4/IFNG	2
GO:0046007	GO:0046007	negative regulation of activated T cell proliferation	2/55	15/18723	0.00086809	0.0052322	0.00289571	CRTAM/PRNP	2
GO:1903543	GO:1903543	positive regulation of exosomal secretion	2/55	15/18723	0.00086809	0.0052322	0.00289571	IFNG/SDC4	2
GO:0030888	GO:0030888	regulation of B cell proliferation	3/55	64/18723	0.00088034	0.00529161	0.00292859	IL2/IL13/IL4	3
GO:0071559	GO:0071559	response to transforming growth factor beta	5/55	256/18723	0.000915461	0.0054878	0.00303717	XCL1/IL4/HSP90AB1/HSPA5/ZFP36L1	5
GO:0014074	GO:0014074	response to purine-containing compound	4/55	148/18723	0.000934946	0.00557439	0.0030851	PTGS2/AREG/HSPA5/ZFP36L1	4
GO:0051384	GO:0051384	response to glucocorticoid	4/55	148/18723	0.000934946	0.00557439	0.0030851	PTGS2/AREG/TNF/ZFP36L1	4
GO:0045834	GO:0045834	positive regulation of lipid metabolic process	4/55	149/18723	0.000958659	0.00566464	0.00313504	PTGS2/TNF/NR4A3/IFNG	4
GO:0002562	GO:0002562	somatic diversification of immune receptors via germline recombination within a single locus	3/55	66/18723	0.000962887	0.00566464	0.00313504	IL2/IL4/CD40LG	3
GO:0016444	GO:0016444	somatic cell DNA recombination	3/55	66/18723	0.000962887	0.00566464	0.00313504	IL2/IL4/CD40LG	3
GO:0042093	GO:0042093	T-helper cell differentiation	3/55	66/18723	0.000962887	0.00566464	0.00313504	IL2/IL4/NFKBID	3
GO:2000573	GO:2000573	positive regulation of DNA biosynthetic process	3/55	66/18723	0.000962887	0.00566464	0.00313504	HSP90AB1/MYC/RGCC	3
GO:0002830	GO:0002830	positive regulation of type 2 immune response	2/55	16/18723	0.000990235	0.00576421	0.00319015	XCL1/IL4	2
GO:0010819	GO:0010819	regulation of T cell chemotaxis	2/55	16/18723	0.000990235	0.00576421	0.00319015	XCL2/XCL1	2
GO:0045342	GO:0045342	MHC class II biosynthetic process	2/55	16/18723	0.000990235	0.00576421	0.00319015	IL4/IFNG	2
GO:0051044	GO:0051044	positive regulation of membrane protein ectodomain proteolysis	2/55	16/18723	0.000990235	0.00576421	0.00319015	TNF/IFNG	2
GO:0016445	GO:0016445	somatic diversification of immunoglobulins	3/55	67/18723	0.00100593	0.00580276	0.00321148	IL2/IL4/CD40LG	3
GO:0050435	GO:0050435	amyloid-beta metabolic process	3/55	67/18723	0.00100593	0.00580276	0.00321148	TNF/IFNG/PRNP	3
GO:1902117	GO:1902117	positive regulation of organelle assembly	3/55	67/18723	0.00100593	0.00580276	0.00321148	CSF2/TNF/SDC4	3
GO:0071456	GO:0071456	cellular response to hypoxia	4/55	151/18723	0.00100735	0.00580276	0.00321148	PTGS2/MYC/RGCC/ZFP36L1	4
GO:0009636	GO:0009636	response to toxic substance	5/55	262/18723	0.00101524	0.00583299	0.00322821	PRDX1/PTGS2/KDM6B/CCL3/CCL4	5
GO:0042267	GO:0042267	natural killer cell mediated cytotoxicity	3/55	68/18723	0.00105018	0.0060026	0.00332208	PRDX1/CRTAM/GZMB	3
GO:0042987	GO:0042987	amyloid precursor protein catabolic process	3/55	68/18723	0.00105018	0.0060026	0.00332208	TNF/IFNG/PRNP	3
GO:1904377	GO:1904377	positive regulation of protein localization to cell periphery	3/55	69/18723	0.00109565	0.00624632	0.00345697	TNF/IFNG/PRNP	3
GO:0006606	GO:0006606	protein import into nucleus	4/55	155/18723	0.00110992	0.0063114	0.00349299	PTGS2/HSP90AB1/IFNG/NFKBIA	4
GO:0045591	GO:0045591	positive regulation of regulatory T cell differentiation	2/55	17/18723	0.00112015	0.00633632	0.00350678	IL2/IFNG	2
GO:1903541	GO:1903541	regulation of exosomal secretion	2/55	17/18723	0.00112015	0.00633632	0.00350678	IFNG/SDC4	2
GO:0050708	GO:0050708	regulation of protein secretion	5/55	268/18723	0.00112289	0.00633632	0.00350678	CD200/IL13/TNF/IFNG/PIM3	5
GO:0002228	GO:0002228	natural killer cell mediated immunity	3/55	71/18723	0.00119027	0.00668241	0.00369831	PRDX1/CRTAM/GZMB	3
GO:0050795	GO:0050795	regulation of behavior	3/55	71/18723	0.00119027	0.00668241	0.00369831	CSF2/NR4A3/CCL3	3
GO:0051170	GO:0051170	import into nucleus	4/55	159/18723	0.00121961	0.00682981	0.00377989	PTGS2/HSP90AB1/IFNG/NFKBIA	4
GO:0032729	GO:0032729	positive regulation of interferon-gamma production	3/55	72/18723	0.00123945	0.00685917	0.00379614	IL2/TNF/CRTAM	3
GO:0060402	GO:0060402	calcium ion transport into cytosol	4/55	160/18723	0.00124818	0.00685917	0.00379614	XCL1/IL13/CCL3/PRNP	4
GO:0002544	GO:0002544	chronic inflammatory response	2/55	18/18723	0.0012578	0.00685917	0.00379614	IL4/TNF	2
GO:0002923	GO:0002923	regulation of humoral immune response mediated by circulating immunoglobulin	2/55	18/18723	0.0012578	0.00685917	0.00379614	CD55/TNF	2
GO:0031649	GO:0031649	heat generation	2/55	18/18723	0.0012578	0.00685917	0.00379614	PTGS2/TNF	2
GO:0035743	GO:0035743	CD4-positive, alpha-beta T cell cytokine production	2/55	18/18723	0.0012578	0.00685917	0.00379614	XCL1/IL4	2
GO:0045623	GO:0045623	negative regulation of T-helper cell differentiation	2/55	18/18723	0.0012578	0.00685917	0.00379614	IL2/IL4	2
GO:0071800	GO:0071800	podosome assembly	2/55	18/18723	0.0012578	0.00685917	0.00379614	CSF2/TNF	2
GO:0150078	GO:0150078	positive regulation of neuroinflammatory response	2/55	18/18723	0.0012578	0.00685917	0.00379614	TNF/CCL3	2
GO:0150079	GO:0150079	negative regulation of neuroinflammatory response	2/55	18/18723	0.0012578	0.00685917	0.00379614	CD200/IL4	2
GO:0043270	GO:0043270	positive regulation of ion transport	5/55	275/18723	0.00125896	0.00685917	0.00379614	XCL1/IL13/IFNG/CCL3/CCL4	5
GO:0036294	GO:0036294	cellular response to decreased oxygen levels	4/55	161/18723	0.00127721	0.00694149	0.0038417	PTGS2/MYC/RGCC/ZFP36L1	4
GO:0032732	GO:0032732	positive regulation of interleukin-1 production	3/55	73/18723	0.00128989	0.00699323	0.00387034	TNF/IFNG/CCL3	3
GO:0043434	GO:0043434	response to peptide hormone	6/55	414/18723	0.00130859	0.00707726	0.00391685	PTGS2/NR4A2/AREG/NR4A3/ZFP36L1/TIMP1	6
GO:0016032	GO:0016032	viral process	6/55	415/18723	0.00132481	0.00714754	0.00395574	CD55/TNF/HSP90AB1/CCL1/CCL3/CCL4	6
GO:0043031	GO:0043031	negative regulation of macrophage activation	2/55	19/18723	0.00140313	0.00753333	0.00416925	CD200/IL4	2
GO:2001185	GO:2001185	regulation of CD8-positive, alpha-beta T cell activation	2/55	19/18723	0.00140313	0.00753333	0.00416925	XCL1/CRTAM	2
GO:1903532	GO:1903532	positive regulation of secretion by cell	5/55	282/18723	0.00140689	0.0075352	0.00417028	IL13/IL4/IFNG/RGCC/SDC4	5
GO:0006816	GO:0006816	calcium ion transport	6/55	422/18723	0.00144275	0.00769005	0.00425598	XCL1/PTGS2/IL13/CCL3/CCL4/PRNP	6
GO:0072594	GO:0072594	establishment of protein localization to organelle	6/55	422/18723	0.00144275	0.00769005	0.00425598	PTGS2/HSP90AB1/HSPA5/IFNG/GZMB/NFKBIA	6
GO:0031960	GO:0031960	response to corticosteroid	4/55	167/18723	0.00146142	0.00777082	0.00430069	PTGS2/AREG/TNF/ZFP36L1	4
GO:0048608	GO:0048608	reproductive structure development	6/55	424/18723	0.00147788	0.00783951	0.0043387	PTGS2/CSF2/HSP90AB1/HSPA5/LIF/ZFP36L1	6
GO:0002200	GO:0002200	somatic diversification of immune receptors	3/55	77/18723	0.00150455	0.00792399	0.00438546	IL2/IL4/CD40LG	3
GO:0007492	GO:0007492	endoderm development	3/55	77/18723	0.00150455	0.00792399	0.00438546	DUSP2/DUSP4/ZFP36L1	3
GO:0032418	GO:0032418	lysosome localization	3/55	77/18723	0.00150455	0.00792399	0.00438546	IL13/IL4/NR4A3	3
GO:0061458	GO:0061458	reproductive system development	6/55	427/18723	0.0015318	0.0080049	0.00443023	PTGS2/CSF2/HSP90AB1/HSPA5/LIF/ZFP36L1	6
GO:0009110	GO:0009110	vitamin biosynthetic process	2/55	20/18723	0.00155611	0.0080049	0.00443023	TNF/IFNG	2
GO:0010042	GO:0010042	response to manganese ion	2/55	20/18723	0.00155611	0.0080049	0.00443023	PTGS2/HSPA5	2
GO:0010893	GO:0010893	positive regulation of steroid biosynthetic process	2/55	20/18723	0.00155611	0.0080049	0.00443023	TNF/IFNG	2
GO:0033141	GO:0033141	positive regulation of peptidyl-serine phosphorylation of STAT protein	2/55	20/18723	0.00155611	0.0080049	0.00443023	IFNG/LIF	2
GO:0042359	GO:0042359	vitamin D metabolic process	2/55	20/18723	0.00155611	0.0080049	0.00443023	TNF/IFNG	2
GO:0043011	GO:0043011	myeloid dendritic cell differentiation	2/55	20/18723	0.00155611	0.0080049	0.00443023	CSF2/IL4	2
GO:1902004	GO:1902004	positive regulation of amyloid-beta formation	2/55	20/18723	0.00155611	0.0080049	0.00443023	TNF/IFNG	2
GO:1990182	GO:1990182	exosomal secretion	2/55	20/18723	0.00155611	0.0080049	0.00443023	IFNG/SDC4	2
GO:2000010	GO:2000010	positive regulation of protein localization to cell surface	2/55	20/18723	0.00155611	0.0080049	0.00443023	TNF/HSP90AB1	2
GO:0070373	GO:0070373	negative regulation of ERK1 and ERK2 cascade	3/55	78/18723	0.0015615	0.00801401	0.00443528	DUSP4/DUSP6/LIF	3
GO:0034504	GO:0034504	protein localization to nucleus	5/55	290/18723	0.00159127	0.00814787	0.00450936	PTGS2/HSP90AB1/IFNG/NFKBIA/LIF	5
GO:0010632	GO:0010632	regulation of epithelial cell migration	5/55	292/18723	0.00164002	0.0083781	0.00463678	PTGS2/IL4/TNF/IFNG/RGCC	5
GO:0030502	GO:0030502	negative regulation of bone mineralization	2/55	21/18723	0.00171667	0.00868942	0.00480908	SRGN/CCL3	2
GO:0045655	GO:0045655	regulation of monocyte differentiation	2/55	21/18723	0.00171667	0.00868942	0.00480908	MYC/ZFP36L1	2
GO:0046641	GO:0046641	positive regulation of alpha-beta T cell proliferation	2/55	21/18723	0.00171667	0.00868942	0.00480908	XCL1/CD55	2
GO:0097734	GO:0097734	extracellular exosome biogenesis	2/55	21/18723	0.00171667	0.00868942	0.00480908	IFNG/SDC4	2
GO:0050673	GO:0050673	epithelial cell proliferation	6/55	437/18723	0.00172244	0.00869874	0.00481424	AREG/TNF/MYC/NR4A3/RGCC/ZFP36L1	6
GO:1905475	GO:1905475	regulation of protein localization to membrane	4/55	175/18723	0.00173488	0.00872962	0.00483133	TNF/IFNG/GZMB/PRNP	4
GO:0048708	GO:0048708	astrocyte differentiation	3/55	81/18723	0.0017404	0.00872962	0.00483133	TNF/IFNG/LIF	3
GO:0071260	GO:0071260	cellular response to mechanical stimulus	3/55	81/18723	0.0017404	0.00872962	0.00483133	PTGS2/IL13/TNFSF14	3
GO:0050728	GO:0050728	negative regulation of inflammatory response	4/55	176/18723	0.00177139	0.00886496	0.00490623	CD200/IL2/IL13/IL4	4
GO:0001892	GO:0001892	embryonic placenta development	3/55	82/18723	0.00180276	0.00894506	0.00495056	CSF2/LIF/ZFP36L1	3
GO:0002312	GO:0002312	B cell activation involved in immune response	3/55	82/18723	0.00180276	0.00894506	0.00495056	IL2/IL4/CD40LG	3
GO:0046889	GO:0046889	positive regulation of lipid biosynthetic process	3/55	82/18723	0.00180276	0.00894506	0.00495056	PTGS2/TNF/IFNG	3
GO:0045936	GO:0045936	negative regulation of phosphate metabolic process	6/55	441/18723	0.00180357	0.00894506	0.00495056	IL2/TNF/IFNG/DUSP6/PRNP/GADD45B	6
GO:0071453	GO:0071453	cellular response to oxygen levels	4/55	177/18723	0.00180843	0.0089491	0.0049528	PTGS2/MYC/RGCC/ZFP36L1	4
GO:0010563	GO:0010563	negative regulation of phosphorus metabolic process	6/55	442/18723	0.0018243	0.00900748	0.0049851	IL2/TNF/IFNG/DUSP6/PRNP/GADD45B	6
GO:0042063	GO:0042063	gliogenesis	5/55	301/18723	0.00187312	0.00922794	0.00510712	AREG/TNF/IFNG/CCL3/LIF	5
GO:0032700	GO:0032700	negative regulation of interleukin-17 production	2/55	22/18723	0.00188479	0.00924424	0.00511614	IFNG/PRNP	2
GO:0043371	GO:0043371	negative regulation of CD4-positive, alpha-beta T cell differentiation	2/55	22/18723	0.00188479	0.00924424	0.00511614	IL2/IL4	2
GO:0010921	GO:0010921	regulation of phosphatase activity	3/55	84/18723	0.00193162	0.00945299	0.00523167	TNF/HSP90AB1/IFNG	3
GO:0002709	GO:0002709	regulation of T cell mediated immunity	3/55	85/18723	0.00199815	0.009753	0.00539771	XCL1/CD55/IL4	3
GO:0060401	GO:0060401	cytosolic calcium ion transport	4/55	182/18723	0.00200175	0.009753	0.00539771	XCL1/IL13/CCL3/PRNP	4
GO:0001666	GO:0001666	response to hypoxia	5/55	307/18723	0.00204148	0.00992474	0.00549275	PTGS2/NR4A2/MYC/RGCC/ZFP36L1	5
GO:0010888	GO:0010888	negative regulation of lipid storage	2/55	23/18723	0.00206041	0.00992948	0.00549538	TNF/NFKBIA	2
GO:0032740	GO:0032740	positive regulation of interleukin-17 production	2/55	23/18723	0.00206041	0.00992948	0.00549538	IL2/CCL1	2
GO:0033139	GO:0033139	regulation of peptidyl-serine phosphorylation of STAT protein	2/55	23/18723	0.00206041	0.00992948	0.00549538	IFNG/LIF	2
GO:0140112	GO:0140112	extracellular vesicle biogenesis	2/55	23/18723	0.00206041	0.00992948	0.00549538	IFNG/SDC4	2
GO:0007369	GO:0007369	gastrulation	4/55	185/18723	0.00212436	0.0101933	0.00564137	DUSP2/DUSP4/NR4A3/KDM6B	4
GO:0043433	GO:0043433	negative regulation of DNA-binding transcription factor activity	4/55	185/18723	0.00212436	0.0101933	0.00564137	XCL1/CD200/NFKBIA/PRNP	4
GO:0051047	GO:0051047	positive regulation of secretion	5/55	310/18723	0.0021297	0.0101967	0.00564329	IL13/IL4/IFNG/RGCC/SDC4	5
GO:0071478	GO:0071478	cellular response to radiation	4/55	186/18723	0.00216637	0.0103499	0.00572805	PTGS2/MYC/HSPA5/TIMP1	4
GO:0043302	GO:0043302	positive regulation of leukocyte degranulation	2/55	24/18723	0.0022435	0.0106723	0.00590648	IL13/IL4	2
GO:2000353	GO:2000353	positive regulation of endothelial cell apoptotic process	2/55	24/18723	0.0022435	0.0106723	0.00590648	CD40LG/RGCC	2
GO:0009410	GO:0009410	response to xenobiotic stimulus	6/55	462/18723	0.00227826	0.0108132	0.00598444	PTGS2/HSP90AB1/MYC/HSPA5/DUSP6/PRNP	6
GO:0018105	GO:0018105	peptidyl-serine phosphorylation	5/55	315/18723	0.00228289	0.0108132	0.00598444	PTGS2/TNF/HSP90AB1/IFNG/LIF	5
GO:0034644	GO:0034644	cellular response to UV	3/55	90/18723	0.00235222	0.0111177	0.00615301	PTGS2/MYC/TIMP1	3
GO:0032872	GO:0032872	regulation of stress-activated MAPK cascade	4/55	192/18723	0.00243051	0.0114068	0.00631299	PRDX1/TNF/MYC/GADD45B	4
GO:0048143	GO:0048143	astrocyte activation	2/55	25/18723	0.002434	0.0114068	0.00631299	TNF/IFNG	2
GO:0070423	GO:0070423	nucleotide-binding oligomerization domain containing signaling pathway	2/55	25/18723	0.002434	0.0114068	0.00631299	BIRC3/NFKBIA	2
GO:1902993	GO:1902993	positive regulation of amyloid precursor protein catabolic process	2/55	25/18723	0.002434	0.0114068	0.00631299	TNF/IFNG	2
GO:0071496	GO:0071496	cellular response to external stimulus	5/55	320/18723	0.00244398	0.0114293	0.00632546	PTGS2/NR4A2/IL13/HSPA5/TNFSF14	5
GO:0036293	GO:0036293	response to decreased oxygen levels	5/55	322/18723	0.00251068	0.0117165	0.00648438	PTGS2/NR4A2/MYC/RGCC/ZFP36L1	5
GO:0050777	GO:0050777	negative regulation of immune response	4/55	194/18723	0.00252327	0.0117505	0.0065032	XCL1/CD55/IL2/IL4	4
GO:0070302	GO:0070302	regulation of stress-activated protein kinase signaling cascade	4/55	195/18723	0.00257056	0.0119455	0.00661115	PRDX1/TNF/MYC/GADD45B	4
GO:0051591	GO:0051591	response to cAMP	3/55	93/18723	0.00258215	0.0119742	0.00662703	AREG/HSPA5/ZFP36L1	3
GO:0035872	GO:0035872	nucleotide-binding domain, leucine rich repeat containing receptor signaling pathway	2/55	26/18723	0.00263188	0.0121034	0.00669849	BIRC3/NFKBIA	2
GO:0045672	GO:0045672	positive regulation of osteoclast differentiation	2/55	26/18723	0.00263188	0.0121034	0.00669849	TNF/IFNG	2
GO:0046639	GO:0046639	negative regulation of alpha-beta T cell differentiation	2/55	26/18723	0.00263188	0.0121034	0.00669849	IL2/IL4	2
GO:0046697	GO:0046697	decidualization	2/55	26/18723	0.00263188	0.0121034	0.00669849	PTGS2/LIF	2
GO:0045185	GO:0045185	maintenance of protein location	3/55	94/18723	0.00266177	0.0122154	0.00676051	HSPA5/SRGN/NFKBIA	3
GO:0002831	GO:0002831	regulation of response to biotic stimulus	5/55	327/18723	0.00268323	0.0122884	0.0068009	CD55/IL4/HSP90AB1/BIRC3/CRTAM	5
GO:0050864	GO:0050864	regulation of B cell activation	4/55	198/18723	0.00271607	0.0124131	0.00686991	IL2/IL13/IL4/ZFP36L1	4
GO:0042982	GO:0042982	amyloid precursor protein metabolic process	3/55	95/18723	0.00274289	0.0125098	0.00692346	TNF/IFNG/PRNP	3
GO:0071902	GO:0071902	positive regulation of protein serine/threonine kinase activity	4/55	200/18723	0.00281616	0.0127554	0.00705934	TNF/HSP90AB1/IFNG/RGCC	4
GO:0002719	GO:0002719	negative regulation of cytokine production involved in immune response	2/55	27/18723	0.00283709	0.0127554	0.00705934	XCL1/TNF	2
GO:0032703	GO:0032703	negative regulation of interleukin-2 production	2/55	27/18723	0.00283709	0.0127554	0.00705934	XCL1/PRNP	2
GO:0042501	GO:0042501	serine phosphorylation of STAT protein	2/55	27/18723	0.00283709	0.0127554	0.00705934	IFNG/LIF	2
GO:0045830	GO:0045830	positive regulation of isotype switching	2/55	27/18723	0.00283709	0.0127554	0.00705934	IL2/IL4	2
GO:0060333	GO:0060333	interferon-gamma-mediated signaling pathway	2/55	27/18723	0.00283709	0.0127554	0.00705934	HSP90AB1/IFNG	2
GO:0071624	GO:0071624	positive regulation of granulocyte chemotaxis	2/55	27/18723	0.00283709	0.0127554	0.00705934	XCL1/IL4	2
GO:0120162	GO:0120162	positive regulation of cold-induced thermogenesis	3/55	97/18723	0.00290969	0.0130167	0.00720397	IL13/IL4/KDM6B	3
GO:2001237	GO:2001237	negative regulation of extrinsic apoptotic signaling pathway	3/55	97/18723	0.00290969	0.0130167	0.00720397	CSF2/IL4/TNF	3
GO:0017157	GO:0017157	regulation of exocytosis	4/55	202/18723	0.00291875	0.0130167	0.00720397	IL13/IL4/IFNG/SDC4	4
GO:0019722	GO:0019722	calcium-mediated signaling	4/55	202/18723	0.00291875	0.0130167	0.00720397	TNF/CCL3/CCL4/PRNP	4
GO:0042113	GO:0042113	B cell activation	5/55	334/18723	0.00293908	0.0130547	0.00722501	IL2/IL13/IL4/CD40LG/ZFP36L1	5
GO:0062012	GO:0062012	regulation of small molecule metabolic process	5/55	334/18723	0.00293908	0.0130547	0.00722501	PTGS2/IL4/TNF/NR4A3/IFNG	5
GO:0002675	GO:0002675	positive regulation of acute inflammatory response	2/55	28/18723	0.00304959	0.013457	0.00744764	PTGS2/TNF	2
GO:0045589	GO:0045589	regulation of regulatory T cell differentiation	2/55	28/18723	0.00304959	0.013457	0.00744764	IL2/IFNG	2
GO:0045671	GO:0045671	negative regulation of osteoclast differentiation	2/55	28/18723	0.00304959	0.013457	0.00744764	IL4/CCL3	2
GO:0032386	GO:0032386	regulation of intracellular transport	5/55	337/18723	0.00305398	0.013457	0.00744764	PTGS2/HSP90AB1/IFNG/GZMB/PRNP	5
GO:0033209	GO:0033209	tumor necrosis factor-mediated signaling pathway	3/55	99/18723	0.00308261	0.0135561	0.00750251	TNF/BIRC3/NFKBIA	3
GO:0018209	GO:0018209	peptidyl-serine modification	5/55	338/18723	0.00309299	0.0135748	0.00751285	PTGS2/TNF/HSP90AB1/IFNG/LIF	5
GO:0017038	GO:0017038	protein import	4/55	206/18723	0.00313158	0.0136933	0.00757841	PTGS2/HSP90AB1/IFNG/NFKBIA	4
GO:0048545	GO:0048545	response to steroid hormone	5/55	339/18723	0.00313236	0.0136933	0.00757841	PTGS2/AREG/TNF/NR4A3/ZFP36L1	5
GO:0001933	GO:0001933	negative regulation of protein phosphorylation	5/55	342/18723	0.00325266	0.0141911	0.00785393	IL2/IFNG/DUSP6/PRNP/GADD45B	5
GO:0001773	GO:0001773	myeloid dendritic cell activation	2/55	29/18723	0.00326934	0.0142078	0.00786318	CSF2/IL4	2
GO:2000406	GO:2000406	positive regulation of T cell migration	2/55	29/18723	0.00326934	0.0142078	0.00786318	XCL2/XCL1	2
GO:0030336	GO:0030336	negative regulation of cell migration	5/55	344/18723	0.00333469	0.0144634	0.00800464	CD200/IL4/TNF/RGCC/TIMP1	5
GO:0010522	GO:0010522	regulation of calcium ion transport into cytosol	3/55	102/18723	0.00335364	0.0145171	0.00803437	XCL1/IL13/PRNP	3
GO:0043491	GO:0043491	protein kinase B signaling	4/55	211/18723	0.00341225	0.014742	0.00815881	TNF/HSP90AB1/CCL3/ZFP36L1	4
GO:0070482	GO:0070482	response to oxygen levels	5/55	347/18723	0.00346053	0.0149214	0.00825812	PTGS2/NR4A2/MYC/RGCC/ZFP36L1	5
GO:0043032	GO:0043032	positive regulation of macrophage activation	2/55	30/18723	0.00349629	0.0149301	0.00826291	IL13/CCL3	2
GO:0043304	GO:0043304	regulation of mast cell degranulation	2/55	30/18723	0.00349629	0.0149301	0.00826291	IL13/IL4	2
GO:0045577	GO:0045577	regulation of B cell differentiation	2/55	30/18723	0.00349629	0.0149301	0.00826291	IL2/ZFP36L1	2
GO:0045940	GO:0045940	positive regulation of steroid metabolic process	2/55	30/18723	0.00349629	0.0149301	0.00826291	TNF/IFNG	2
GO:0070168	GO:0070168	negative regulation of biomineral tissue development	2/55	30/18723	0.00349629	0.0149301	0.00826291	SRGN/CCL3	2
GO:1903076	GO:1903076	regulation of protein localization to plasma membrane	3/55	104/18723	0.00354219	0.015097	0.00835528	TNF/IFNG/PRNP	3
GO:0009612	GO:0009612	response to mechanical stimulus	4/55	216/18723	0.00370962	0.015686	0.00868126	PTGS2/IL13/NFKBIA/TNFSF14	4
GO:0002828	GO:0002828	regulation of type 2 immune response	2/55	31/18723	0.00373039	0.015686	0.00868126	XCL1/IL4	2
GO:0033006	GO:0033006	regulation of mast cell activation involved in immune response	2/55	31/18723	0.00373039	0.015686	0.00868126	IL13/IL4	2
GO:0045066	GO:0045066	regulatory T cell differentiation	2/55	31/18723	0.00373039	0.015686	0.00868126	IL2/IFNG	2
GO:0110150	GO:0110150	negative regulation of biomineralization	2/55	31/18723	0.00373039	0.015686	0.00868126	SRGN/CCL3	2
GO:0035821	GO:0035821	modulation of process of other organism	3/55	106/18723	0.00373712	0.015686	0.00868126	IFNG/CCL3/CCL4	3
GO:0046822	GO:0046822	regulation of nucleocytoplasmic transport	3/55	106/18723	0.00373712	0.015686	0.00868126	PTGS2/HSP90AB1/IFNG	3
GO:2000278	GO:2000278	regulation of DNA biosynthetic process	3/55	106/18723	0.00373712	0.015686	0.00868126	HSP90AB1/MYC/RGCC	3
GO:0051341	GO:0051341	regulation of oxidoreductase activity	3/55	107/18723	0.003837	0.0160747	0.00889639	IL13/TNF/IFNG	3
GO:2001233	GO:2001233	regulation of apoptotic signaling pathway	5/55	356/18723	0.0038586	0.0161346	0.00892957	PTGS2/NR4A2/CSF2/IL4/TNF	5
GO:0034764	GO:0034764	positive regulation of transmembrane transport	4/55	219/18723	0.00389625	0.0162613	0.00899968	XCL1/IL13/NR4A3/IFNG	4
GO:0010631	GO:0010631	epithelial cell migration	5/55	357/18723	0.00390478	0.0162662	0.00900239	PTGS2/IL4/TNF/IFNG/RGCC	5
GO:0010743	GO:0010743	regulation of macrophage derived foam cell differentiation	2/55	32/18723	0.00397162	0.0164826	0.00912214	CSF2/NFKBIA	2
GO:0043372	GO:0043372	positive regulation of CD4-positive, alpha-beta T cell differentiation	2/55	32/18723	0.00397162	0.0164826	0.00912214	IFNG/NFKBID	2
GO:0009306	GO:0009306	protein secretion	5/55	359/18723	0.00399832	0.0165005	0.00913206	CD200/IL13/TNF/IFNG/PIM3	5
GO:0051052	GO:0051052	regulation of DNA metabolic process	5/55	359/18723	0.00399832	0.0165005	0.00913206	IL2/IL4/HSP90AB1/MYC/RGCC	5
GO:2000146	GO:2000146	negative regulation of cell motility	5/55	359/18723	0.00399832	0.0165005	0.00913206	CD200/IL4/TNF/RGCC/TIMP1	5
GO:0002456	GO:0002456	T cell mediated immunity	3/55	109/18723	0.00404161	0.0166031	0.00918882	XCL1/CD55/IL4	3
GO:0035592	GO:0035592	establishment of protein localization to extracellular region	5/55	360/18723	0.00404569	0.0166031	0.00918882	CD200/IL13/TNF/IFNG/PIM3	5
GO:0090132	GO:0090132	epithelium migration	5/55	360/18723	0.00404569	0.0166031	0.00918882	PTGS2/IL4/TNF/IFNG/RGCC	5
GO:0000302	GO:0000302	response to reactive oxygen species	4/55	222/18723	0.00408917	0.0167504	0.00927037	PRDX1/AREG/NR4A3/KDM6B	4
GO:0032611	GO:0032611	interleukin-1 beta production	3/55	110/18723	0.00414636	0.0169221	0.00936535	TNF/IFNG/CCL3	3
GO:0032651	GO:0032651	regulation of interleukin-1 beta production	3/55	110/18723	0.00414636	0.0169221	0.00936535	TNF/IFNG/CCL3	3
GO:1901099	GO:1901099	negative regulation of signal transduction in absence of ligand	2/55	33/18723	0.00421992	0.0171275	0.00947903	CSF2/TNF	2
GO:1904031	GO:1904031	positive regulation of cyclin-dependent protein kinase activity	2/55	33/18723	0.00421992	0.0171275	0.00947903	HSP90AB1/RGCC	2
GO:2001240	GO:2001240	negative regulation of extrinsic apoptotic signaling pathway in absence of ligand	2/55	33/18723	0.00421992	0.0171275	0.00947903	CSF2/TNF	2
GO:0090130	GO:0090130	tissue migration	5/55	365/18723	0.00428861	0.0173744	0.00961567	PTGS2/IL4/TNF/IFNG/RGCC	5
GO:0002526	GO:0002526	acute inflammatory response	3/55	112/18723	0.0043608	0.0176024	0.00974186	PTGS2/IL4/TNF	3
GO:0010633	GO:0010633	negative regulation of epithelial cell migration	3/55	112/18723	0.0043608	0.0176024	0.00974186	IL4/TNF/RGCC	3
GO:0051271	GO:0051271	negative regulation of cellular component movement	5/55	367/18723	0.00438864	0.0176825	0.00978619	CD200/IL4/TNF/RGCC/TIMP1	5
GO:0071692	GO:0071692	protein localization to extracellular region	5/55	368/18723	0.00443928	0.0178044	0.0098537	CD200/IL13/TNF/IFNG/PIM3	5
GO:0010922	GO:0010922	positive regulation of phosphatase activity	2/55	34/18723	0.00447526	0.0178044	0.0098537	HSP90AB1/IFNG	2
GO:0032770	GO:0032770	positive regulation of monooxygenase activity	2/55	34/18723	0.00447526	0.0178044	0.0098537	TNF/IFNG	2
GO:0051085	GO:0051085	chaperone cofactor-dependent protein refolding	2/55	34/18723	0.00447526	0.0178044	0.0098537	HSPA5/HSPH1	2
GO:0051973	GO:0051973	positive regulation of telomerase activity	2/55	34/18723	0.00447526	0.0178044	0.0098537	HSP90AB1/MYC	2
GO:0070884	GO:0070884	regulation of calcineurin-NFAT signaling cascade	2/55	34/18723	0.00447526	0.0178044	0.0098537	TNF/PRNP	2
GO:2000352	GO:2000352	negative regulation of endothelial cell apoptotic process	2/55	34/18723	0.00447526	0.0178044	0.0098537	IL13/IL4	2
GO:0045055	GO:0045055	regulated exocytosis	4/55	230/18723	0.00463506	0.0184071	0.0101872	IL13/IL4/NR4A3/CCL3	4
GO:0046916	GO:0046916	cellular transition metal ion homeostasis	3/55	115/18723	0.00469491	0.0185478	0.0102651	MYC/IFNG/PRNP	3
GO:0051209	GO:0051209	release of sequestered calcium ion into cytosol	3/55	115/18723	0.00469491	0.0185478	0.0102651	XCL1/IL13/CCL3	3
GO:0001893	GO:0001893	maternal placenta development	2/55	35/18723	0.00473758	0.0185478	0.0102651	PTGS2/LIF	2
GO:0010837	GO:0010837	regulation of keratinocyte proliferation	2/55	35/18723	0.00473758	0.0185478	0.0102651	AREG/ZFP36L1	2
GO:0021955	GO:0021955	central nervous system neuron axonogenesis	2/55	35/18723	0.00473758	0.0185478	0.0102651	NR4A2/HSP90AB1	2
GO:0034405	GO:0034405	response to fluid shear stress	2/55	35/18723	0.00473758	0.0185478	0.0102651	PTGS2/CSF2	2
GO:0046640	GO:0046640	regulation of alpha-beta T cell proliferation	2/55	35/18723	0.00473758	0.0185478	0.0102651	XCL1/CD55	2
GO:0106056	GO:0106056	regulation of calcineurin-mediated signaling	2/55	35/18723	0.00473758	0.0185478	0.0102651	TNF/PRNP	2
GO:0002253	GO:0002253	activation of immune response	5/55	375/18723	0.00480552	0.0187635	0.0103845	CD55/NR4A3/RGCC/PRNP/NFKBID	5
GO:0051283	GO:0051283	negative regulation of sequestering of calcium ion	3/55	116/18723	0.00480962	0.0187635	0.0103845	XCL1/IL13/CCL3	3
GO:0042092	GO:0042092	type 2 immune response	2/55	36/18723	0.00500686	0.0194643	0.0107723	XCL1/IL4	2
GO:0045191	GO:0045191	regulation of isotype switching	2/55	36/18723	0.00500686	0.0194643	0.0107723	IL2/IL4	2
GO:0051101	GO:0051101	regulation of DNA binding	3/55	118/18723	0.00504412	0.0195405	0.0108145	IFNG/NFKBIA/LIF	3
GO:0051282	GO:0051282	regulation of sequestering of calcium ion	3/55	118/18723	0.00504412	0.0195405	0.0108145	XCL1/IL13/CCL3	3
GO:0030282	GO:0030282	bone mineralization	3/55	119/18723	0.00516392	0.0199696	0.011052	PTGS2/SRGN/CCL3	3
GO:0043029	GO:0043029	T cell homeostasis	2/55	37/18723	0.00528304	0.0203682	0.0112726	IL2/TNFSF14	2
GO:0051897	GO:0051897	positive regulation of protein kinase B signaling	3/55	120/18723	0.00528543	0.0203682	0.0112726	TNF/HSP90AB1/CCL3	3
GO:0042326	GO:0042326	negative regulation of phosphorylation	5/55	385/18723	0.00536546	0.0206049	0.0114036	IL2/IFNG/DUSP6/PRNP/GADD45B	5
GO:0045786	GO:0045786	negative regulation of cell cycle	5/55	385/18723	0.00536546	0.0206049	0.0114036	PTGS2/TNF/RGCC/LIF/ZFP36L1	5
GO:0001704	GO:0001704	formation of primary germ layer	3/55	121/18723	0.00540864	0.0207347	0.0114754	DUSP2/DUSP4/KDM6B	3
GO:0051208	GO:0051208	sequestering of calcium ion	3/55	122/18723	0.00553358	0.0210825	0.0116679	XCL1/IL13/CCL3	3
GO:0002385	GO:0002385	mucosal immune response	2/55	38/18723	0.00556609	0.0210825	0.0116679	XCL1/IL4	2
GO:0010742	GO:0010742	macrophage derived foam cell differentiation	2/55	38/18723	0.00556609	0.0210825	0.0116679	CSF2/NFKBIA	2
GO:0030279	GO:0030279	negative regulation of ossification	2/55	38/18723	0.00556609	0.0210825	0.0116679	SRGN/CCL3	2
GO:0046633	GO:0046633	alpha-beta T cell proliferation	2/55	38/18723	0.00556609	0.0210825	0.0116679	XCL1/CD55	2
GO:0090077	GO:0090077	foam cell differentiation	2/55	38/18723	0.00556609	0.0210825	0.0116679	CSF2/NFKBIA	2
GO:1903580	GO:1903580	positive regulation of ATP metabolic process	2/55	38/18723	0.00556609	0.0210825	0.0116679	IL4/IFNG	2
GO:0071482	GO:0071482	cellular response to light stimulus	3/55	123/18723	0.00566025	0.0214025	0.011845	PTGS2/MYC/TIMP1	3
GO:0040013	GO:0040013	negative regulation of locomotion	5/55	391/18723	0.00572286	0.0215655	0.0119352	CD200/IL4/TNF/RGCC/TIMP1	5
GO:0042176	GO:0042176	regulation of protein catabolic process	5/55	391/18723	0.00572286	0.0215655	0.0119352	TNF/HSP90AB1/RNF19A/IFNG/TIMP1	5
GO:0002701	GO:0002701	negative regulation of production of molecular mediator of immune response	2/55	39/18723	0.00585597	0.0219549	0.0121507	XCL1/TNF	2
GO:0045923	GO:0045923	positive regulation of fatty acid metabolic process	2/55	39/18723	0.00585597	0.0219549	0.0121507	PTGS2/NR4A3	2
GO:0051084	GO:0051084	'de novo' posttranslational protein folding	2/55	39/18723	0.00585597	0.0219549	0.0121507	HSPA5/HSPH1	2
GO:1904375	GO:1904375	regulation of protein localization to cell periphery	3/55	125/18723	0.00591879	0.0221529	0.0122603	TNF/IFNG/PRNP	3
GO:0046883	GO:0046883	regulation of hormone secretion	4/55	249/18723	0.00612403	0.0228824	0.012664	TNF/IFNG/LIF/PIM3	4
GO:0051281	GO:0051281	positive regulation of release of sequestered calcium ion into cytosol	2/55	40/18723	0.00615263	0.0229118	0.0126803	XCL1/IL13	2
GO:0070266	GO:0070266	necroptotic process	2/55	40/18723	0.00615263	0.0229118	0.0126803	TNF/BIRC3	2
GO:0032612	GO:0032612	interleukin-1 production	3/55	128/18723	0.00631971	0.0234157	0.0129592	TNF/IFNG/CCL3	3
GO:0032652	GO:0032652	regulation of interleukin-1 production	3/55	128/18723	0.00631971	0.0234157	0.0129592	TNF/IFNG/CCL3	3
GO:0035303	GO:0035303	regulation of dephosphorylation	3/55	128/18723	0.00631971	0.0234157	0.0129592	TNF/HSP90AB1/IFNG	3
GO:0002251	GO:0002251	organ or tissue specific immune response	2/55	41/18723	0.00645603	0.0237222	0.0131288	XCL1/IL4	2
GO:0032735	GO:0032735	positive regulation of interleukin-12 production	2/55	41/18723	0.00645603	0.0237222	0.0131288	CD40LG/IFNG	2
GO:0071470	GO:0071470	cellular response to osmotic stress	2/55	41/18723	0.00645603	0.0237222	0.0131288	PTGS2/ZFP36L1	2
GO:1905521	GO:1905521	regulation of macrophage migration	2/55	41/18723	0.00645603	0.0237222	0.0131288	CD200/CCL3	2
GO:2000008	GO:2000008	regulation of protein localization to cell surface	2/55	41/18723	0.00645603	0.0237222	0.0131288	TNF/HSP90AB1	2
GO:1903844	GO:1903844	regulation of cellular response to transforming growth factor beta stimulus	3/55	131/18723	0.00673651	0.0247117	0.0136765	IL4/HSP90AB1/HSPA5	3
GO:0032689	GO:0032689	negative regulation of interferon-gamma production	2/55	42/18723	0.00676614	0.0247383	0.0136912	XCL1/PRNP	2
GO:1904037	GO:1904037	positive regulation of epithelial cell apoptotic process	2/55	42/18723	0.00676614	0.0247383	0.0136912	CD40LG/RGCC	2
GO:0001503	GO:0001503	ossification	5/55	408/18723	0.00682676	0.0249188	0.0137911	PTGS2/AREG/TNF/SRGN/CCL3	5
GO:0031348	GO:0031348	negative regulation of defense response	4/55	258/18723	0.00692905	0.0252505	0.0139747	CD200/IL2/IL13/IL4	4
GO:0006458	GO:0006458	'de novo' protein folding	2/55	43/18723	0.00708291	0.0255586	0.0141451	HSPA5/HSPH1	2
GO:0014002	GO:0014002	astrocyte development	2/55	43/18723	0.00708291	0.0255586	0.0141451	TNF/IFNG	2
GO:0033173	GO:0033173	calcineurin-NFAT signaling cascade	2/55	43/18723	0.00708291	0.0255586	0.0141451	TNF/PRNP	2
GO:0045981	GO:0045981	positive regulation of nucleotide metabolic process	2/55	43/18723	0.00708291	0.0255586	0.0141451	IL4/IFNG	2
GO:1900544	GO:1900544	positive regulation of purine nucleotide metabolic process	2/55	43/18723	0.00708291	0.0255586	0.0141451	IL4/IFNG	2
GO:2001239	GO:2001239	regulation of extrinsic apoptotic signaling pathway in absence of ligand	2/55	43/18723	0.00708291	0.0255586	0.0141451	CSF2/TNF	2
GO:0051091	GO:0051091	positive regulation of DNA-binding transcription factor activity	4/55	260/18723	0.00711701	0.0256398	0.0141901	CD200/TNF/CD40LG/RGCC	4
GO:0032147	GO:0032147	activation of protein kinase activity	3/55	134/18723	0.00716935	0.0257864	0.0142712	IL4/RGCC/PRNP	3
GO:0006775	GO:0006775	fat-soluble vitamin metabolic process	2/55	44/18723	0.0074063	0.0265093	0.0146713	TNF/IFNG	2
GO:0031295	GO:0031295	T cell costimulation	2/55	44/18723	0.0074063	0.0265093	0.0146713	CD40LG/TNFSF14	2
GO:0046427	GO:0046427	positive regulation of receptor signaling pathway via JAK-STAT	2/55	44/18723	0.0074063	0.0265093	0.0146713	IL4/TNF	2
GO:0072073	GO:0072073	kidney epithelium development	3/55	136/18723	0.0074669	0.0266442	0.014746	MYC/SDC4/LIF	3
GO:0016311	GO:0016311	dephosphorylation	5/55	417/18723	0.00746809	0.0266442	0.014746	TNF/HSP90AB1/DUSP4/IFNG/DUSP6	5
GO:0030522	GO:0030522	intracellular receptor signaling pathway	4/55	265/18723	0.00760164	0.027077	0.0149855	NR4A2/NR4A3/BIRC3/NFKBIA	4
GO:0006986	GO:0006986	response to unfolded protein	3/55	137/18723	0.00761838	0.027093	0.0149944	HSP90AB1/HSPA5/HSPH1	3
GO:0032102	GO:0032102	negative regulation of response to external stimulus	5/55	420/18723	0.00769094	0.0273072	0.0151129	CD200/IL2/IL13/IL4/TNF	5
GO:0002920	GO:0002920	regulation of humoral immune response	2/55	45/18723	0.00773627	0.0273802	0.0151533	CD55/TNF	2
GO:2000273	GO:2000273	positive regulation of signaling receptor activity	2/55	45/18723	0.00773627	0.0273802	0.0151533	AREG/IFNG	2
GO:0055076	GO:0055076	transition metal ion homeostasis	3/55	138/18723	0.00777167	0.0274616	0.0151983	MYC/IFNG/PRNP	3
GO:0045598	GO:0045598	regulation of fat cell differentiation	3/55	139/18723	0.00792679	0.027965	0.015477	PTGS2/TNF/ZFP36L1	3
GO:0035094	GO:0035094	response to nicotine	2/55	46/18723	0.00807279	0.0283444	0.015687	IL13/TNF	2
GO:0043300	GO:0043300	regulation of leukocyte degranulation	2/55	46/18723	0.00807279	0.0283444	0.015687	IL13/IL4	2
GO:0043616	GO:0043616	keratinocyte proliferation	2/55	46/18723	0.00807279	0.0283444	0.015687	AREG/ZFP36L1	2
GO:0031331	GO:0031331	positive regulation of cellular catabolic process	5/55	427/18723	0.00822896	0.0288014	0.0159398	IL4/TNF/RNF19A/IFNG/ZFP36L1	5
GO:0048568	GO:0048568	embryonic organ development	5/55	427/18723	0.00822896	0.0288014	0.0159398	IL3/CSF2/TNF/LIF/ZFP36L1	5
GO:0048872	GO:0048872	homeostasis of number of cells	4/55	272/18723	0.00831605	0.0290602	0.0160831	PRDX1/IL2/TNFSF14/ZFP36L1	4
GO:0045581	GO:0045581	negative regulation of T cell differentiation	2/55	47/18723	0.0084158	0.0290871	0.016098	IL2/IL4	2
GO:0045911	GO:0045911	positive regulation of DNA recombination	2/55	47/18723	0.0084158	0.0290871	0.016098	IL2/IL4	2
GO:0046677	GO:0046677	response to antibiotic	2/55	47/18723	0.0084158	0.0290871	0.016098	HSPA5/KDM6B	2
GO:0051972	GO:0051972	regulation of telomerase activity	2/55	47/18723	0.0084158	0.0290871	0.016098	HSP90AB1/MYC	2
GO:0090279	GO:0090279	regulation of calcium ion import	2/55	47/18723	0.0084158	0.0290871	0.016098	CCL3/PRNP	2
GO:0097028	GO:0097028	dendritic cell differentiation	2/55	47/18723	0.0084158	0.0290871	0.016098	CSF2/IL4	2
GO:0097300	GO:0097300	programmed necrotic cell death	2/55	47/18723	0.0084158	0.0290871	0.016098	TNF/BIRC3	2
GO:0106106	GO:0106106	cold-induced thermogenesis	3/55	144/18723	0.00872982	0.0300785	0.0166466	IL13/IL4/KDM6B	3
GO:0120161	GO:0120161	regulation of cold-induced thermogenesis	3/55	144/18723	0.00872982	0.0300785	0.0166466	IL13/IL4/KDM6B	3
GO:0048146	GO:0048146	positive regulation of fibroblast proliferation	2/55	48/18723	0.00876528	0.0301068	0.0166623	IL13/MYC	2
GO:0097720	GO:0097720	calcineurin-mediated signaling	2/55	48/18723	0.00876528	0.0301068	0.0166623	TNF/PRNP	2
GO:0042542	GO:0042542	response to hydrogen peroxide	3/55	146/18723	0.00906394	0.0310401	0.0171788	AREG/NR4A3/KDM6B	3
GO:0006953	GO:0006953	acute-phase response	2/55	49/18723	0.00912118	0.0310401	0.0171788	PTGS2/TNF	2
GO:0030857	GO:0030857	negative regulation of epithelial cell differentiation	2/55	49/18723	0.00912118	0.0310401	0.0171788	IL13/IFNG	2
GO:0043457	GO:0043457	regulation of cellular respiration	2/55	49/18723	0.00912118	0.0310401	0.0171788	IL4/IFNG	2
GO:1904707	GO:1904707	positive regulation of vascular associated smooth muscle cell proliferation	2/55	49/18723	0.00912118	0.0310401	0.0171788	TNF/NR4A3	2
GO:1904894	GO:1904894	positive regulation of receptor signaling pathway via STAT	2/55	49/18723	0.00912118	0.0310401	0.0171788	IL4/TNF	2
GO:0050804	GO:0050804	modulation of chemical synaptic transmission	5/55	439/18723	0.00921148	0.0312992	0.0173223	PTGS2/TNF/RNF19A/SRGN/PRNP	5
GO:1903531	GO:1903531	negative regulation of secretion by cell	3/55	147/18723	0.00923377	0.0313269	0.0173376	CD200/LIF/PIM3	3
GO:0099177	GO:0099177	regulation of trans-synaptic signaling	5/55	440/18723	0.00929686	0.0314473	0.0174042	PTGS2/TNF/RNF19A/SRGN/PRNP	5
GO:0007249	GO:0007249	I-kappaB kinase/NF-kappaB signaling	4/55	281/18723	0.0092977	0.0314473	0.0174042	REL/TNF/BIRC3/NFKBIA	4
GO:0019083	GO:0019083	viral transcription	2/55	50/18723	0.00948347	0.0318322	0.0176172	CCL3/CCL4	2
GO:0046638	GO:0046638	positive regulation of alpha-beta T cell differentiation	2/55	50/18723	0.00948347	0.0318322	0.0176172	IFNG/NFKBID	2
GO:0060425	GO:0060425	lung morphogenesis	2/55	50/18723	0.00948347	0.0318322	0.0176172	TNF/LIF	2
GO:1904036	GO:1904036	negative regulation of epithelial cell apoptotic process	2/55	50/18723	0.00948347	0.0318322	0.0176172	IL13/IL4	2
GO:2000677	GO:2000677	regulation of transcription regulatory region DNA binding	2/55	50/18723	0.00948347	0.0318322	0.0176172	IFNG/LIF	2
GO:0009411	GO:0009411	response to UV	3/55	149/18723	0.00957904	0.0321043	0.0177678	PTGS2/MYC/TIMP1	3
GO:0014009	GO:0014009	glial cell proliferation	2/55	51/18723	0.0098521	0.0327712	0.0181369	AREG/TNF	2
GO:0045661	GO:0045661	regulation of myoblast differentiation	2/55	51/18723	0.0098521	0.0327712	0.0181369	TNF/ZFP36L1	2
GO:0045668	GO:0045668	negative regulation of osteoblast differentiation	2/55	51/18723	0.0098521	0.0327712	0.0181369	AREG/TNF	2
GO:0071622	GO:0071622	regulation of granulocyte chemotaxis	2/55	51/18723	0.0098521	0.0327712	0.0181369	XCL1/IL4	2
GO:1903307	GO:1903307	positive regulation of regulated secretory pathway	2/55	51/18723	0.0098521	0.0327712	0.0181369	IL13/IL4	2
GO:0043535	GO:0043535	regulation of blood vessel endothelial cell migration	3/55	151/18723	0.00993178	0.0328387	0.0181743	PTGS2/TNF/RGCC	3
GO:0048754	GO:0048754	branching morphogenesis of an epithelial tube	3/55	151/18723	0.00993178	0.0328387	0.0181743	AREG/TNF/MYC	3
GO:1904064	GO:1904064	positive regulation of cation transmembrane transport	3/55	151/18723	0.00993178	0.0328387	0.0181743	XCL1/IL13/IFNG	3
GO:2001236	GO:2001236	regulation of extrinsic apoptotic signaling pathway	3/55	151/18723	0.00993178	0.0328387	0.0181743	CSF2/IL4/TNF	3
GO:0050871	GO:0050871	positive regulation of B cell activation	3/55	152/18723	0.010111	0.0333334	0.018448	IL2/IL13/IL4	3
GO:0034599	GO:0034599	cellular response to oxidative stress	4/55	288/18723	0.0101115	0.0333334	0.018448	PRDX1/NR4A2/NR4A3/KDM6B	4
GO:0051496	GO:0051496	positive regulation of stress fiber assembly	2/55	52/18723	0.010227	0.033664	0.018631	RGCC/SDC4	2
GO:0044403	GO:0044403	biological process involved in symbiotic interaction	4/55	290/18723	0.0103523	0.0340256	0.0188312	CD55/HSP90AB1/CCL3/CCL4	4
GO:0002707	GO:0002707	negative regulation of lymphocyte mediated immunity	2/55	53/18723	0.0106082	0.0347636	0.0192396	XCL1/CD55	2
GO:0071320	GO:0071320	cellular response to cAMP	2/55	53/18723	0.0106082	0.0347636	0.0192396	HSPA5/ZFP36L1	2
GO:0034614	GO:0034614	cellular response to reactive oxygen species	3/55	155/18723	0.0106598	0.0348809	0.0193045	PRDX1/NR4A3/KDM6B	3
GO:0046879	GO:0046879	hormone secretion	4/55	295/18723	0.0109704	0.0358209	0.0198248	TNF/IFNG/LIF/PIM3	4
GO:0001706	GO:0001706	endoderm formation	2/55	54/18723	0.0109957	0.0358209	0.0198248	DUSP2/DUSP4	2
GO:0010524	GO:0010524	positive regulation of calcium ion transport into cytosol	2/55	54/18723	0.0109957	0.0358209	0.0198248	XCL1/IL13	2
GO:1990845	GO:1990845	adaptive thermogenesis	3/55	157/18723	0.0110352	0.0358967	0.0198667	IL13/IL4/KDM6B	3
GO:0038066	GO:0038066	p38MAPK cascade	2/55	55/18723	0.0113893	0.0367106	0.0203171	GADD45B/ZFP36L1	2
GO:0042220	GO:0042220	response to cocaine	2/55	55/18723	0.0113893	0.0367106	0.0203171	HSP90AB1/HSPA5	2
GO:0045620	GO:0045620	negative regulation of lymphocyte differentiation	2/55	55/18723	0.0113893	0.0367106	0.0203171	IL2/IL4	2
GO:0048016	GO:0048016	inositol phosphate-mediated signaling	2/55	55/18723	0.0113893	0.0367106	0.0203171	TNF/PRNP	2
GO:0061098	GO:0061098	positive regulation of protein tyrosine kinase activity	2/55	55/18723	0.0113893	0.0367106	0.0203171	AREG/PRNP	2
GO:1905517	GO:1905517	macrophage migration	2/55	55/18723	0.0113893	0.0367106	0.0203171	CD200/CCL3	2
GO:0035966	GO:0035966	response to topologically incorrect protein	3/55	159/18723	0.0114181	0.0367106	0.0203171	HSP90AB1/HSPA5/HSPH1	3
GO:1903169	GO:1903169	regulation of calcium ion transmembrane transport	3/55	159/18723	0.0114181	0.0367106	0.0203171	XCL1/IL13/PRNP	3
GO:0006913	GO:0006913	nucleocytoplasmic transport	4/55	301/18723	0.0117432	0.0376297	0.0208258	PTGS2/HSP90AB1/IFNG/NFKBIA	4
GO:0051169	GO:0051169	nuclear transport	4/55	301/18723	0.0117432	0.0376297	0.0208258	PTGS2/HSP90AB1/IFNG/NFKBIA	4
GO:0001912	GO:0001912	positive regulation of leukocyte mediated cytotoxicity	2/55	56/18723	0.011789	0.0376297	0.0208258	XCL1/CRTAM	2
GO:0002886	GO:0002886	regulation of myeloid leukocyte mediated immunity	2/55	56/18723	0.011789	0.0376297	0.0208258	IL13/IL4	2
GO:0010332	GO:0010332	response to gamma radiation	2/55	56/18723	0.011789	0.0376297	0.0208258	MYC/HSPA5	2
GO:0002764	GO:0002764	immune response-regulating signaling pathway	5/55	468/18723	0.0119161	0.0379805	0.0210199	NR4A3/BIRC3/NFKBIA/PRNP/NFKBID	5
GO:0051051	GO:0051051	negative regulation of transport	5/55	470/18723	0.0121206	0.0385766	0.0213499	PTGS2/CD200/TNF/LIF/PIM3	5
GO:0010883	GO:0010883	regulation of lipid storage	2/55	57/18723	0.0121949	0.0387575	0.0214499	TNF/NFKBIA	2
GO:0050806	GO:0050806	positive regulation of synaptic transmission	3/55	164/18723	0.0124089	0.0393386	0.0217716	PTGS2/TNF/PRNP	3
GO:0009914	GO:0009914	hormone transport	4/55	306/18723	0.0124134	0.0393386	0.0217716	TNF/IFNG/LIF/PIM3	4
GO:0043666	GO:0043666	regulation of phosphoprotein phosphatase activity	2/55	58/18723	0.0126069	0.0397428	0.0219953	TNF/HSP90AB1	2
GO:0032635	GO:0032635	interleukin-6 production	3/55	165/18723	0.0126128	0.0397428	0.0219953	CD200/TNF/IFNG	3
GO:0032675	GO:0032675	regulation of interleukin-6 production	3/55	165/18723	0.0126128	0.0397428	0.0219953	CD200/TNF/IFNG	3
GO:0050796	GO:0050796	regulation of insulin secretion	3/55	165/18723	0.0126128	0.0397428	0.0219953	TNF/IFNG/PIM3	3
GO:0032768	GO:0032768	regulation of monooxygenase activity	2/55	59/18723	0.0130249	0.0408135	0.0225878	TNF/IFNG	2
GO:0035306	GO:0035306	positive regulation of dephosphorylation	2/55	59/18723	0.0130249	0.0408135	0.0225878	HSP90AB1/IFNG	2
GO:0051353	GO:0051353	positive regulation of oxidoreductase activity	2/55	59/18723	0.0130249	0.0408135	0.0225878	TNF/IFNG	2
GO:0034767	GO:0034767	positive regulation of ion transmembrane transport	3/55	167/18723	0.0130264	0.0408135	0.0225878	XCL1/IL13/IFNG	3
GO:0019932	GO:0019932	second-messenger-mediated signaling	4/55	312/18723	0.0132495	0.0413952	0.0229098	TNF/CCL3/CCL4/PRNP	4
GO:0070588	GO:0070588	calcium ion transmembrane transport	4/55	312/18723	0.0132495	0.0413952	0.0229098	XCL1/IL13/CCL3/PRNP	4
GO:0031214	GO:0031214	biomineral tissue development	3/55	169/18723	0.0134477	0.0418409	0.0231565	PTGS2/SRGN/CCL3	3
GO:0002753	GO:0002753	cytoplasmic pattern recognition receptor signaling pathway	2/55	60/18723	0.0134489	0.0418409	0.0231565	BIRC3/NFKBIA	2
GO:0051851	GO:0051851	modulation by host of symbiont process	2/55	60/18723	0.0134489	0.0418409	0.0231565	CCL3/CCL4	2
GO:0046890	GO:0046890	regulation of lipid biosynthetic process	3/55	171/18723	0.0138767	0.042937	0.0237631	PTGS2/TNF/IFNG	3
GO:0051048	GO:0051048	negative regulation of secretion	3/55	171/18723	0.0138767	0.042937	0.0237631	CD200/LIF/PIM3	3
GO:0110148	GO:0110148	biomineralization	3/55	171/18723	0.0138767	0.042937	0.0237631	PTGS2/SRGN/CCL3	3
GO:0034113	GO:0034113	heterotypic cell-cell adhesion	2/55	61/18723	0.0138788	0.042937	0.0237631	CD200/TNF	2
GO:0006959	GO:0006959	humoral immune response	4/55	317/18723	0.0139732	0.0431685	0.0238912	CD55/TNF/IFNG/RGCC	4
GO:0015980	GO:0015980	energy derivation by oxidation of organic compounds	4/55	318/18723	0.0141209	0.0435639	0.02411	IL4/MYC/NR4A3/IFNG	4
GO:0010469	GO:0010469	regulation of signaling receptor activity	3/55	173/18723	0.0143135	0.0436145	0.024138	AREG/TNF/IFNG	3
GO:0002260	GO:0002260	lymphocyte homeostasis	2/55	62/18723	0.0143147	0.0436145	0.024138	IL2/TNFSF14	2
GO:0010573	GO:0010573	vascular endothelial growth factor production	2/55	62/18723	0.0143147	0.0436145	0.024138	PTGS2/TNF	2
GO:0032615	GO:0032615	interleukin-12 production	2/55	62/18723	0.0143147	0.0436145	0.024138	CD40LG/IFNG	2
GO:0032623	GO:0032623	interleukin-2 production	2/55	62/18723	0.0143147	0.0436145	0.024138	XCL1/PRNP	2
GO:0032655	GO:0032655	regulation of interleukin-12 production	2/55	62/18723	0.0143147	0.0436145	0.024138	CD40LG/IFNG	2
GO:0032663	GO:0032663	regulation of interleukin-2 production	2/55	62/18723	0.0143147	0.0436145	0.024138	XCL1/PRNP	2
GO:0060135	GO:0060135	maternal process involved in female pregnancy	2/55	62/18723	0.0143147	0.0436145	0.024138	PTGS2/LIF	2
GO:0070265	GO:0070265	necrotic cell death	2/55	62/18723	0.0143147	0.0436145	0.024138	TNF/BIRC3	2
GO:0009896	GO:0009896	positive regulation of catabolic process	5/55	492/18723	0.0145302	0.0442101	0.0244677	IL4/TNF/RNF19A/IFNG/ZFP36L1	5
GO:0002704	GO:0002704	negative regulation of leukocyte mediated immunity	2/55	63/18723	0.0147565	0.0446577	0.0247154	XCL1/CD55	2
GO:0032233	GO:0032233	positive regulation of actin filament bundle assembly	2/55	63/18723	0.0147565	0.0446577	0.0247154	RGCC/SDC4	2
GO:2000242	GO:2000242	negative regulation of reproductive process	2/55	63/18723	0.0147565	0.0446577	0.0247154	LIF/TIMP1	2
GO:0048771	GO:0048771	tissue remodeling	3/55	175/18723	0.014758	0.0446577	0.0247154	IL2/LIF/TIMP1	3
GO:0043534	GO:0043534	blood vessel endothelial cell migration	3/55	176/18723	0.0149832	0.0452772	0.0250583	PTGS2/TNF/RGCC	3
GO:0060562	GO:0060562	epithelial tube morphogenesis	4/55	325/18723	0.0151827	0.0456518	0.0252656	AREG/TNF/MYC/SDC4	4
GO:0030858	GO:0030858	positive regulation of epithelial cell differentiation	2/55	64/18723	0.0152041	0.0456518	0.0252656	IL13/LIF	2
GO:0046888	GO:0046888	negative regulation of hormone secretion	2/55	64/18723	0.0152041	0.0456518	0.0252656	LIF/PIM3	2
GO:0030324	GO:0030324	lung development	3/55	177/18723	0.0152104	0.0456518	0.0252656	IL13/TNF/LIF	3
GO:0071466	GO:0071466	cellular response to xenobiotic stimulus	3/55	177/18723	0.0152104	0.0456518	0.0252656	MYC/HSPA5/PRNP	3
GO:0009266	GO:0009266	response to temperature stimulus	3/55	178/18723	0.0154395	0.0462767	0.0256114	PTGS2/HSP90AB1/NFKBIA	3
GO:0032507	GO:0032507	maintenance of protein location in cell	2/55	65/18723	0.0156575	0.0468033	0.0259029	HSPA5/SRGN	2
GO:1905330	GO:1905330	regulation of morphogenesis of an epithelium	2/55	65/18723	0.0156575	0.0468033	0.0259029	TNF/LIF	2
GO:0071897	GO:0071897	DNA biosynthetic process	3/55	180/18723	0.0159036	0.0474746	0.0262744	HSP90AB1/MYC/RGCC	3
GO:0014015	GO:0014015	positive regulation of gliogenesis	2/55	66/18723	0.0161167	0.0475979	0.0263426	TNF/LIF	2
GO:0032715	GO:0032715	negative regulation of interleukin-6 production	2/55	66/18723	0.0161167	0.0475979	0.0263426	CD200/TNF	2
GO:0045600	GO:0045600	positive regulation of fat cell differentiation	2/55	66/18723	0.0161167	0.0475979	0.0263426	PTGS2/ZFP36L1	2
GO:0050766	GO:0050766	positive regulation of phagocytosis	2/55	66/18723	0.0161167	0.0475979	0.0263426	TNF/IFNG	2
GO:1905953	GO:1905953	negative regulation of lipid localization	2/55	66/18723	0.0161167	0.0475979	0.0263426	TNF/NFKBIA	2
GO:0019216	GO:0019216	regulation of lipid metabolic process	4/55	331/18723	0.0161322	0.0475979	0.0263426	PTGS2/TNF/NR4A3/IFNG	4
GO:0030323	GO:0030323	respiratory tube development	3/55	181/18723	0.0161385	0.0475979	0.0263426	IL13/TNF/LIF	3
GO:0032640	GO:0032640	tumor necrosis factor production	3/55	181/18723	0.0161385	0.0475979	0.0263426	IL4/IFNG/CCL3	3
GO:0032680	GO:0032680	regulation of tumor necrosis factor production	3/55	181/18723	0.0161385	0.0475979	0.0263426	IL4/IFNG/CCL3	3
GO:0061138	GO:0061138	morphogenesis of a branching epithelium	3/55	182/18723	0.0163755	0.0482324	0.0266938	AREG/TNF/MYC	3
GO:0006879	GO:0006879	cellular iron ion homeostasis	2/55	67/18723	0.0165817	0.0487101	0.0269581	MYC/IFNG	2
GO:0061077	GO:0061077	chaperone-mediated protein folding	2/55	67/18723	0.0165817	0.0487101	0.0269581	HSPA5/HSPH1	2
GO:0034394	GO:0034394	protein localization to cell surface	2/55	68/18723	0.0170523	0.0500262	0.0276865	TNF/HSP90AB1	2
GO:0051896	GO:0051896	regulation of protein kinase B signaling	3/55	185/18723	0.017098	0.0500938	0.027724	TNF/HSP90AB1/CCL3	3
GO:0043123	GO:0043123	positive regulation of I-kappaB kinase/NF-kappaB signaling	3/55	186/18723	0.0173428	0.0505432	0.0279727	REL/TNF/BIRC3	3
GO:0071706	GO:0071706	tumor necrosis factor superfamily cytokine production	3/55	186/18723	0.0173428	0.0505432	0.0279727	IL4/IFNG/CCL3	3
GO:1902115	GO:1902115	regulation of organelle assembly	3/55	186/18723	0.0173428	0.0505432	0.0279727	CSF2/TNF/SDC4	3
GO:1903555	GO:1903555	regulation of tumor necrosis factor superfamily cytokine production	3/55	186/18723	0.0173428	0.0505432	0.0279727	IL4/IFNG/CCL3	3
GO:0007568	GO:0007568	aging	4/55	339/18723	0.0174553	0.0507505	0.0280874	PTGS2/BCL2A1/PRNP/TIMP1	4
GO:0034605	GO:0034605	cellular response to heat	2/55	69/18723	0.0175287	0.0507505	0.0280874	PTGS2/HSP90AB1	2
GO:0050810	GO:0050810	regulation of steroid biosynthetic process	2/55	69/18723	0.0175287	0.0507505	0.0280874	TNF/IFNG	2
GO:0051966	GO:0051966	regulation of synaptic transmission, glutamatergic	2/55	69/18723	0.0175287	0.0507505	0.0280874	PTGS2/TNF	2
GO:1901224	GO:1901224	positive regulation of NIK/NF-kappaB signaling	2/55	69/18723	0.0175287	0.0507505	0.0280874	TNF/TNFSF14	2
GO:0032722	GO:0032722	positive regulation of chemokine production	2/55	71/18723	0.0184981	0.0534875	0.0296021	TNF/IFNG	2
GO:0050709	GO:0050709	negative regulation of protein secretion	2/55	72/18723	0.0189913	0.0548416	0.0303516	CD200/PIM3	2
GO:0007565	GO:0007565	female pregnancy	3/55	193/18723	0.0191114	0.0551166	0.0305038	PTGS2/LIF/TIMP1	3
GO:0072088	GO:0072088	nephron epithelium morphogenesis	2/55	73/18723	0.0194899	0.0560619	0.0310269	MYC/LIF	2
GO:1904427	GO:1904427	positive regulation of calcium ion transmembrane transport	2/55	73/18723	0.0194899	0.0560619	0.0310269	XCL1/IL13	2
GO:0030073	GO:0030073	insulin secretion	3/55	195/18723	0.0196345	0.0564045	0.0312165	TNF/IFNG/PIM3	3
GO:0001763	GO:0001763	morphogenesis of a branching structure	3/55	196/18723	0.019899	0.0570162	0.0315551	AREG/TNF/MYC	3
GO:0090276	GO:0090276	regulation of peptide hormone secretion	3/55	196/18723	0.019899	0.0570162	0.0315551	TNF/IFNG/PIM3	3
GO:0002437	GO:0002437	inflammatory response to antigenic stimulus	2/55	74/18723	0.019994	0.0572144	0.0316648	TNF/KDM6B	2
GO:0071248	GO:0071248	cellular response to metal ion	3/55	197/18723	0.0201655	0.0576305	0.031895	PTGS2/HSPA5/PRNP	3
GO:1904062	GO:1904062	regulation of cation transmembrane transport	4/55	357/18723	0.0206762	0.059014	0.0326607	XCL1/IL13/IFNG/PRNP	4
GO:0002791	GO:0002791	regulation of peptide secretion	3/55	200/18723	0.0209767	0.0597106	0.0330463	TNF/IFNG/PIM3	3
GO:0001937	GO:0001937	negative regulation of endothelial cell proliferation	2/55	76/18723	0.0210186	0.0597106	0.0330463	TNF/RGCC	2
GO:0072028	GO:0072028	nephron morphogenesis	2/55	76/18723	0.0210186	0.0597106	0.0330463	MYC/LIF	2
GO:0071900	GO:0071900	regulation of protein serine/threonine kinase activity	4/55	359/18723	0.0210553	0.0597106	0.0330463	TNF/HSP90AB1/IFNG/RGCC	4
GO:1901653	GO:1901653	cellular response to peptide	4/55	359/18723	0.0210553	0.0597106	0.0330463	NR4A2/NR4A3/PRNP/ZFP36L1	4
GO:0090087	GO:0090087	regulation of peptide transport	3/55	202/18723	0.0215275	0.060926	0.0337189	TNF/IFNG/PIM3	3
GO:0010827	GO:0010827	regulation of glucose transmembrane transport	2/55	77/18723	0.0215389	0.060926	0.0337189	TNF/NR4A3	2
GO:0060541	GO:0060541	respiratory system development	3/55	203/18723	0.0218058	0.061581	0.0340814	IL13/TNF/LIF	3
GO:0051098	GO:0051098	regulation of binding	4/55	363/18723	0.0218262	0.061581	0.0340814	HSP90AB1/IFNG/NFKBIA/LIF	4
GO:0030500	GO:0030500	regulation of bone mineralization	2/55	78/18723	0.0220647	0.0620955	0.0343661	SRGN/CCL3	2
GO:0043537	GO:0043537	negative regulation of blood vessel endothelial cell migration	2/55	78/18723	0.0220647	0.0620955	0.0343661	TNF/RGCC	2
GO:0051279	GO:0051279	regulation of release of sequestered calcium ion into cytosol	2/55	79/18723	0.0225957	0.0635091	0.0351485	XCL1/IL13	2
GO:0050679	GO:0050679	positive regulation of epithelial cell proliferation	3/55	207/18723	0.022939	0.0643923	0.0356373	AREG/MYC/NR4A3	3
GO:0048145	GO:0048145	regulation of fibroblast proliferation	2/55	80/18723	0.023132	0.0648517	0.0358916	IL13/MYC	2
GO:0045862	GO:0045862	positive regulation of proteolysis	4/55	372/18723	0.0236237	0.0660352	0.0365466	TNF/RNF19A/MYC/IFNG	4
GO:0021954	GO:0021954	central nervous system neuron development	2/55	81/18723	0.0236736	0.0660352	0.0365466	NR4A2/HSP90AB1	2
GO:0048144	GO:0048144	fibroblast proliferation	2/55	81/18723	0.0236736	0.0660352	0.0365466	IL13/MYC	2
GO:0051817	GO:0051817	modulation of process of other organism involved in symbiotic interaction	2/55	81/18723	0.0236736	0.0660352	0.0365466	CCL3/CCL4	2
GO:0031396	GO:0031396	regulation of protein ubiquitination	3/55	210/18723	0.0238097	0.0663314	0.0367105	HSP90AB1/HSPA5/BIRC3	3
GO:0050807	GO:0050807	regulation of synapse organization	3/55	211/18723	0.0241039	0.0670666	0.0371174	TNF/SRGN/PRNP	3
GO:0001910	GO:0001910	regulation of leukocyte mediated cytotoxicity	2/55	82/18723	0.0242203	0.0673058	0.0372497	XCL1/CRTAM	2
GO:0006457	GO:0006457	protein folding	3/55	212/18723	0.0244001	0.0677203	0.0374791	HSP90AB1/HSPA5/HSPH1	3
GO:0045445	GO:0045445	myoblast differentiation	2/55	84/18723	0.0253294	0.0701234	0.0388091	TNF/ZFP36L1	2
GO:1900542	GO:1900542	regulation of purine nucleotide metabolic process	2/55	84/18723	0.0253294	0.0701234	0.0388091	IL4/IFNG	2
GO:0001656	GO:0001656	metanephros development	2/55	85/18723	0.0258916	0.0715008	0.0395715	MYC/LIF	2
GO:0055072	GO:0055072	iron ion homeostasis	2/55	85/18723	0.0258916	0.0715008	0.0395715	MYC/IFNG	2
GO:0007163	GO:0007163	establishment or maintenance of cell polarity	3/55	218/18723	0.0262188	0.0721342	0.039922	HSP90AB1/CRTAM/CCL4	3
GO:0045088	GO:0045088	regulation of innate immune response	3/55	218/18723	0.0262188	0.0721342	0.039922	HSP90AB1/BIRC3/CRTAM	3
GO:0050803	GO:0050803	regulation of synapse structure or activity	3/55	218/18723	0.0262188	0.0721342	0.039922	TNF/SRGN/PRNP	3
GO:0006140	GO:0006140	regulation of nucleotide metabolic process	2/55	86/18723	0.0264589	0.0727043	0.0402375	IL4/IFNG	2
GO:0044706	GO:0044706	multi-multicellular organism process	3/55	220/18723	0.0268408	0.0736623	0.0407677	PTGS2/LIF/TIMP1	3
GO:0001776	GO:0001776	leukocyte homeostasis	2/55	87/18723	0.0270312	0.0739097	0.0409046	IL2/TNFSF14	2
GO:0019915	GO:0019915	lipid storage	2/55	87/18723	0.0270312	0.0739097	0.0409046	TNF/NFKBIA	2
GO:1903578	GO:1903578	regulation of ATP metabolic process	2/55	87/18723	0.0270312	0.0739097	0.0409046	IL4/IFNG	2
GO:0030101	GO:0030101	natural killer cell activation	2/55	88/18723	0.0276085	0.075395	0.0417267	PRDX1/IL2	2
GO:0046330	GO:0046330	positive regulation of JNK cascade	2/55	89/18723	0.0281908	0.0764504	0.0423107	TNF/GADD45B	2
GO:0010001	GO:0010001	glial cell differentiation	3/55	225/18723	0.0284305	0.0764504	0.0423107	TNF/IFNG/LIF	3
GO:0050769	GO:0050769	positive regulation of neurogenesis	3/55	225/18723	0.0284305	0.0764504	0.0423107	TNF/IFNG/LIF	3
GO:0071241	GO:0071241	cellular response to inorganic substance	3/55	226/18723	0.0287544	0.0764504	0.0423107	PTGS2/HSPA5/PRNP	3
GO:0030901	GO:0030901	midbrain development	2/55	90/18723	0.028778	0.0764504	0.0423107	NR4A2/HSPA5	2
GO:0035304	GO:0035304	regulation of protein dephosphorylation	2/55	90/18723	0.028778	0.0764504	0.0423107	TNF/HSP90AB1	2
GO:0061097	GO:0061097	regulation of protein tyrosine kinase activity	2/55	90/18723	0.028778	0.0764504	0.0423107	AREG/PRNP	2
GO:0099175	GO:0099175	regulation of postsynapse organization	2/55	90/18723	0.028778	0.0764504	0.0423107	SRGN/PRNP	2
GO:1904705	GO:1904705	regulation of vascular associated smooth muscle cell proliferation	2/55	90/18723	0.028778	0.0764504	0.0423107	TNF/NR4A3	2
GO:0003330	GO:0003330	regulation of extracellular matrix constituent secretion	1/55	10/18723	0.0289972	0.0764504	0.0423107	RGCC	1
GO:0009750	GO:0009750	response to fructose	1/55	10/18723	0.0289972	0.0764504	0.0423107	PTGS2	1
GO:0019062	GO:0019062	virion attachment to host cell	1/55	10/18723	0.0289972	0.0764504	0.0423107	HSP90AB1	1
GO:0030388	GO:0030388	fructose 1,6-bisphosphate metabolic process	1/55	10/18723	0.0289972	0.0764504	0.0423107	IFNG	1
GO:0031915	GO:0031915	positive regulation of synaptic plasticity	1/55	10/18723	0.0289972	0.0764504	0.0423107	PTGS2	1
GO:0034756	GO:0034756	regulation of iron ion transport	1/55	10/18723	0.0289972	0.0764504	0.0423107	IFNG	1
GO:0036363	GO:0036363	transforming growth factor beta activation	1/55	10/18723	0.0289972	0.0764504	0.0423107	HSP90AB1	1
GO:0042045	GO:0042045	epithelial fluid transport	1/55	10/18723	0.0289972	0.0764504	0.0423107	CSF2	1
GO:0045835	GO:0045835	negative regulation of meiotic nuclear division	1/55	10/18723	0.0289972	0.0764504	0.0423107	LIF	1
GO:0051409	GO:0051409	response to nitrosative stress	1/55	10/18723	0.0289972	0.0764504	0.0423107	DUSP6	1
GO:0061140	GO:0061140	lung secretory cell differentiation	1/55	10/18723	0.0289972	0.0764504	0.0423107	IL13	1
GO:0061179	GO:0061179	negative regulation of insulin secretion involved in cellular response to glucose stimulus	1/55	10/18723	0.0289972	0.0764504	0.0423107	PIM3	1
GO:0072203	GO:0072203	cell proliferation involved in metanephros development	1/55	10/18723	0.0289972	0.0764504	0.0423107	MYC	1
GO:0090647	GO:0090647	modulation of age-related behavioral decline	1/55	10/18723	0.0289972	0.0764504	0.0423107	PRNP	1
GO:1901203	GO:1901203	positive regulation of extracellular matrix assembly	1/55	10/18723	0.0289972	0.0764504	0.0423107	RGCC	1
GO:1903980	GO:1903980	positive regulation of microglial cell activation	1/55	10/18723	0.0289972	0.0764504	0.0423107	CCL3	1
GO:1990535	GO:1990535	neuron projection maintenance	1/55	10/18723	0.0289972	0.0764504	0.0423107	PRNP	1
GO:2000048	GO:2000048	negative regulation of cell-cell adhesion mediated by cadherin	1/55	10/18723	0.0289972	0.0764504	0.0423107	RGCC	1
GO:2000253	GO:2000253	positive regulation of feeding behavior	1/55	10/18723	0.0289972	0.0764504	0.0423107	NR4A3	1
GO:2001225	GO:2001225	regulation of chloride transport	1/55	10/18723	0.0289972	0.0764504	0.0423107	PRNP	1
GO:0001657	GO:0001657	ureteric bud development	2/55	91/18723	0.0293702	0.0770662	0.0426516	MYC/SDC4	2
GO:0051492	GO:0051492	regulation of stress fiber assembly	2/55	91/18723	0.0293702	0.0770662	0.0426516	RGCC/SDC4	2
GO:0072080	GO:0072080	nephron tubule development	2/55	91/18723	0.0293702	0.0770662	0.0426516	MYC/LIF	2
GO:1990874	GO:1990874	vascular associated smooth muscle cell proliferation	2/55	91/18723	0.0293702	0.0770662	0.0426516	TNF/NR4A3	2
GO:0001649	GO:0001649	osteoblast differentiation	3/55	229/18723	0.0297378	0.0779385	0.0431343	AREG/TNF/CCL3	3
GO:0035249	GO:0035249	synaptic transmission, glutamatergic	2/55	92/18723	0.0299672	0.0781692	0.043262	PTGS2/TNF	2
GO:0070509	GO:0070509	calcium ion import	2/55	92/18723	0.0299672	0.0781692	0.043262	CCL3/PRNP	2
GO:0072163	GO:0072163	mesonephric epithelium development	2/55	92/18723	0.0299672	0.0781692	0.043262	MYC/SDC4	2
GO:0072164	GO:0072164	mesonephric tubule development	2/55	92/18723	0.0299672	0.0781692	0.043262	MYC/SDC4	2
GO:0045333	GO:0045333	cellular respiration	3/55	230/18723	0.0300696	0.0783438	0.0433586	IL4/NR4A3/IFNG	3
GO:0045732	GO:0045732	positive regulation of protein catabolic process	3/55	231/18723	0.0304033	0.0791201	0.0437883	TNF/RNF19A/IFNG	3
GO:0019217	GO:0019217	regulation of fatty acid metabolic process	2/55	93/18723	0.0305691	0.0791789	0.0438208	PTGS2/NR4A3	2
GO:0032088	GO:0032088	negative regulation of NF-kappaB transcription factor activity	2/55	93/18723	0.0305691	0.0791789	0.0438208	CD200/NFKBIA	2
GO:0032755	GO:0032755	positive regulation of interleukin-6 production	2/55	93/18723	0.0305691	0.0791789	0.0438208	TNF/IFNG	2
GO:0060993	GO:0060993	kidney morphogenesis	2/55	93/18723	0.0305691	0.0791789	0.0438208	MYC/LIF	2
GO:0010594	GO:0010594	regulation of endothelial cell migration	3/55	232/18723	0.030739	0.0795259	0.0440129	PTGS2/TNF/RGCC	3
GO:0019080	GO:0019080	viral gene expression	2/55	94/18723	0.0311758	0.0799713	0.0442593	CCL3/CCL4	2
GO:0051702	GO:0051702	biological process involved in interaction with symbiont	2/55	94/18723	0.0311758	0.0799713	0.0442593	CCL3/CCL4	2
GO:0061326	GO:0061326	renal tubule development	2/55	94/18723	0.0311758	0.0799713	0.0442593	MYC/LIF	2
GO:0045930	GO:0045930	negative regulation of mitotic cell cycle	3/55	235/18723	0.0317579	0.0799713	0.0442593	TNF/RGCC/ZFP36L1	3
GO:0050764	GO:0050764	regulation of phagocytosis	2/55	95/18723	0.0317872	0.0799713	0.0442593	TNF/IFNG	2
GO:0002725	GO:0002725	negative regulation of T cell cytokine production	1/55	11/18723	0.0318511	0.0799713	0.0442593	XCL1	1
GO:0002924	GO:0002924	negative regulation of humoral immune response mediated by circulating immunoglobulin	1/55	11/18723	0.0318511	0.0799713	0.0442593	CD55	1
GO:0032329	GO:0032329	serine transport	1/55	11/18723	0.0318511	0.0799713	0.0442593	SFXN1	1
GO:0033860	GO:0033860	regulation of NAD(P)H oxidase activity	1/55	11/18723	0.0318511	0.0799713	0.0442593	IL13	1
GO:0034975	GO:0034975	protein folding in endoplasmic reticulum	1/55	11/18723	0.0318511	0.0799713	0.0442593	HSPA5	1
GO:0042416	GO:0042416	dopamine biosynthetic process	1/55	11/18723	0.0318511	0.0799713	0.0442593	NR4A2	1
GO:0045657	GO:0045657	positive regulation of monocyte differentiation	1/55	11/18723	0.0318511	0.0799713	0.0442593	ZFP36L1	1
GO:0045793	GO:0045793	positive regulation of cell size	1/55	11/18723	0.0318511	0.0799713	0.0442593	HSP90AB1	1
GO:0051132	GO:0051132	NK T cell activation	1/55	11/18723	0.0318511	0.0799713	0.0442593	HSPH1	1
GO:0051798	GO:0051798	positive regulation of hair follicle development	1/55	11/18723	0.0318511	0.0799713	0.0442593	TNF	1
GO:0060433	GO:0060433	bronchus development	1/55	11/18723	0.0318511	0.0799713	0.0442593	IL13	1
GO:0070417	GO:0070417	cellular response to cold	1/55	11/18723	0.0318511	0.0799713	0.0442593	NFKBIA	1
GO:0071492	GO:0071492	cellular response to UV-A	1/55	11/18723	0.0318511	0.0799713	0.0442593	TIMP1	1
GO:0106049	GO:0106049	regulation of cellular response to osmotic stress	1/55	11/18723	0.0318511	0.0799713	0.0442593	PTGS2	1
GO:1901030	GO:1901030	positive regulation of mitochondrial outer membrane permeabilization involved in apoptotic signaling pathway	1/55	11/18723	0.0318511	0.0799713	0.0442593	GZMB	1
GO:1903897	GO:1903897	regulation of PERK-mediated unfolded protein response	1/55	11/18723	0.0318511	0.0799713	0.0442593	HSPA5	1
GO:1904464	GO:1904464	regulation of matrix metallopeptidase secretion	1/55	11/18723	0.0318511	0.0799713	0.0442593	CD200	1
GO:1905522	GO:1905522	negative regulation of macrophage migration	1/55	11/18723	0.0318511	0.0799713	0.0442593	CD200	1
GO:1990440	GO:1990440	positive regulation of transcription from RNA polymerase II promoter in response to endoplasmic reticulum stress	1/55	11/18723	0.0318511	0.0799713	0.0442593	HSPA5	1
GO:1990773	GO:1990773	matrix metallopeptidase secretion	1/55	11/18723	0.0318511	0.0799713	0.0442593	CD200	1
GO:2000343	GO:2000343	positive regulation of chemokine (C-X-C motif) ligand 2 production	1/55	11/18723	0.0318511	0.0799713	0.0442593	TNF	1
GO:0030072	GO:0030072	peptide hormone secretion	3/55	236/18723	0.0321014	0.0805083	0.0445566	TNF/IFNG/PIM3	3
GO:0001823	GO:0001823	mesonephros development	2/55	96/18723	0.0324034	0.081099	0.0448835	MYC/SDC4	2
GO:0031334	GO:0031334	positive regulation of protein-containing complex assembly	3/55	237/18723	0.0324469	0.081099	0.0448835	CSF2/TNF/IFNG	3
GO:1901617	GO:1901617	organic hydroxy compound biosynthetic process	3/55	237/18723	0.0324469	0.081099	0.0448835	NR4A2/TNF/IFNG	3
GO:0010596	GO:0010596	negative regulation of endothelial cell migration	2/55	97/18723	0.0330243	0.0823561	0.0455792	TNF/RGCC	2
GO:0070167	GO:0070167	regulation of biomineral tissue development	2/55	97/18723	0.0330243	0.0823561	0.0455792	SRGN/CCL3	2
GO:0032642	GO:0032642	regulation of chemokine production	2/55	98/18723	0.0336499	0.0836333	0.0462861	TNF/IFNG	2
GO:0070301	GO:0070301	cellular response to hydrogen peroxide	2/55	98/18723	0.0336499	0.0836333	0.0462861	NR4A3/KDM6B	2
GO:1904029	GO:1904029	regulation of cyclin-dependent protein kinase activity	2/55	98/18723	0.0336499	0.0836333	0.0462861	HSP90AB1/RGCC	2
GO:0002790	GO:0002790	peptide secretion	3/55	242/18723	0.0342039	0.0844327	0.0467285	TNF/IFNG/PIM3	3
GO:1903320	GO:1903320	regulation of protein modification by small protein conjugation or removal	3/55	242/18723	0.0342039	0.0844327	0.0467285	HSP90AB1/HSPA5/BIRC3	3
GO:0008630	GO:0008630	intrinsic apoptotic signaling pathway in response to DNA damage	2/55	99/18723	0.0342802	0.0844327	0.0467285	TNF/BCL2A1	2
GO:0032602	GO:0032602	chemokine production	2/55	99/18723	0.0342802	0.0844327	0.0467285	TNF/IFNG	2
GO:0110149	GO:0110149	regulation of biomineralization	2/55	99/18723	0.0342802	0.0844327	0.0467285	SRGN/CCL3	2
GO:0001821	GO:0001821	histamine secretion	1/55	12/18723	0.0346968	0.0844327	0.0467285	CSF2	1
GO:0002674	GO:0002674	negative regulation of acute inflammatory response	1/55	12/18723	0.0346968	0.0844327	0.0467285	IL4	1
GO:0002863	GO:0002863	positive regulation of inflammatory response to antigenic stimulus	1/55	12/18723	0.0346968	0.0844327	0.0467285	TNF	1
GO:0002903	GO:0002903	negative regulation of B cell apoptotic process	1/55	12/18723	0.0346968	0.0844327	0.0467285	IL2	1
GO:0006620	GO:0006620	posttranslational protein targeting to endoplasmic reticulum membrane	1/55	12/18723	0.0346968	0.0844327	0.0467285	HSPA5	1
GO:0032736	GO:0032736	positive regulation of interleukin-13 production	1/55	12/18723	0.0346968	0.0844327	0.0467285	IL4	1
GO:0044650	GO:0044650	adhesion of symbiont to host cell	1/55	12/18723	0.0346968	0.0844327	0.0467285	HSP90AB1	1
GO:0045916	GO:0045916	negative regulation of complement activation	1/55	12/18723	0.0346968	0.0844327	0.0467285	CD55	1
GO:0071287	GO:0071287	cellular response to manganese ion	1/55	12/18723	0.0346968	0.0844327	0.0467285	HSPA5	1
GO:0071472	GO:0071472	cellular response to salt stress	1/55	12/18723	0.0346968	0.0844327	0.0467285	ZFP36L1	1
GO:0072182	GO:0072182	regulation of nephron tubule epithelial cell differentiation	1/55	12/18723	0.0346968	0.0844327	0.0467285	LIF	1
GO:0072537	GO:0072537	fibroblast activation	1/55	12/18723	0.0346968	0.0844327	0.0467285	RGCC	1
GO:1902950	GO:1902950	regulation of dendritic spine maintenance	1/55	12/18723	0.0346968	0.0844327	0.0467285	PRNP	1
GO:1903332	GO:1903332	regulation of protein folding	1/55	12/18723	0.0346968	0.0844327	0.0467285	HSPA5	1
GO:0019218	GO:0019218	regulation of steroid metabolic process	2/55	100/18723	0.0349151	0.0847773	0.0469192	TNF/IFNG	2
GO:0110020	GO:0110020	regulation of actomyosin structure organization	2/55	100/18723	0.0349151	0.0847773	0.0469192	RGCC/SDC4	2
GO:0042060	GO:0042060	wound healing	4/55	422/18723	0.0352353	0.0854612	0.0472977	TNF/CD40LG/SDC4/TIMP1	4
GO:0050830	GO:0050830	defense response to Gram-positive bacterium	2/55	101/18723	0.0355545	0.0860466	0.0476217	TNF/TNFSF8	2
GO:0098869	GO:0098869	cellular oxidant detoxification	2/55	101/18723	0.0355545	0.0860466	0.0476217	PRDX1/PTGS2	2
GO:0043122	GO:0043122	regulation of I-kappaB kinase/NF-kappaB signaling	3/55	249/18723	0.0367456	0.0886081	0.0490393	REL/TNF/BIRC3	3
GO:0043254	GO:0043254	regulation of protein-containing complex assembly	4/55	428/18723	0.036817	0.0886081	0.0490393	CSF2/TNF/HSPA5/IFNG	4
GO:0014013	GO:0014013	regulation of gliogenesis	2/55	103/18723	0.0368471	0.0886081	0.0490393	TNF/LIF	2
GO:0019233	GO:0019233	sensory perception of pain	2/55	103/18723	0.0368471	0.0886081	0.0490393	PTGS2/CCL3	2
GO:0032760	GO:0032760	positive regulation of tumor necrosis factor production	2/55	103/18723	0.0368471	0.0886081	0.0490393	IFNG/CCL3	2
GO:0001768	GO:0001768	establishment of T cell polarity	1/55	13/18723	0.0375343	0.0886081	0.0490393	CRTAM	1
GO:0003337	GO:0003337	mesenchymal to epithelial transition involved in metanephros morphogenesis	1/55	13/18723	0.0375343	0.0886081	0.0490393	LIF	1
GO:0006983	GO:0006983	ER overload response	1/55	13/18723	0.0375343	0.0886081	0.0490393	HSPA5	1
GO:0008298	GO:0008298	intracellular mRNA localization	1/55	13/18723	0.0375343	0.0886081	0.0490393	ZFP36L1	1
GO:0010745	GO:0010745	negative regulation of macrophage derived foam cell differentiation	1/55	13/18723	0.0375343	0.0886081	0.0490393	NFKBIA	1
GO:0031392	GO:0031392	regulation of prostaglandin biosynthetic process	1/55	13/18723	0.0375343	0.0886081	0.0490393	PTGS2	1
GO:0045741	GO:0045741	positive regulation of epidermal growth factor-activated receptor activity	1/55	13/18723	0.0375343	0.0886081	0.0490393	AREG	1
GO:0046642	GO:0046642	negative regulation of alpha-beta T cell proliferation	1/55	13/18723	0.0375343	0.0886081	0.0490393	XCL1	1
GO:0048711	GO:0048711	positive regulation of astrocyte differentiation	1/55	13/18723	0.0375343	0.0886081	0.0490393	LIF	1
GO:0051709	GO:0051709	regulation of killing of cells of other organism	1/55	13/18723	0.0375343	0.0886081	0.0490393	IFNG	1
GO:0060707	GO:0060707	trophoblast giant cell differentiation	1/55	13/18723	0.0375343	0.0886081	0.0490393	LIF	1
GO:0061469	GO:0061469	regulation of type B pancreatic cell proliferation	1/55	13/18723	0.0375343	0.0886081	0.0490393	NR4A3	1
GO:0070424	GO:0070424	regulation of nucleotide-binding oligomerization domain containing signaling pathway	1/55	13/18723	0.0375343	0.0886081	0.0490393	BIRC3	1
GO:0070486	GO:0070486	leukocyte aggregation	1/55	13/18723	0.0375343	0.0886081	0.0490393	NR4A3	1
GO:1900272	GO:1900272	negative regulation of long-term synaptic potentiation	1/55	13/18723	0.0375343	0.0886081	0.0490393	PRNP	1
GO:1903025	GO:1903025	regulation of RNA polymerase II regulatory region sequence-specific DNA binding	1/55	13/18723	0.0375343	0.0886081	0.0490393	LIF	1
GO:1903977	GO:1903977	positive regulation of glial cell migration	1/55	13/18723	0.0375343	0.0886081	0.0490393	CCL3	1
GO:2000318	GO:2000318	positive regulation of T-helper 17 type immune response	1/55	13/18723	0.0375343	0.0886081	0.0490393	NFKBID	1
GO:0032231	GO:0032231	regulation of actin filament bundle assembly	2/55	105/18723	0.0381576	0.0899837	0.0498006	RGCC/SDC4	2
GO:0009743	GO:0009743	response to carbohydrate	3/55	253/18723	0.0382407	0.0899876	0.0498028	PTGS2/PIM3/ZFP36L1	3
GO:0097305	GO:0097305	response to alcohol	3/55	253/18723	0.0382407	0.0899876	0.0498028	IL2/IL13/CCL3	3
GO:0006090	GO:0006090	pyruvate metabolic process	2/55	106/18723	0.0388196	0.0909628	0.0503425	NR4A3/IFNG	2
GO:0006766	GO:0006766	vitamin metabolic process	2/55	106/18723	0.0388196	0.0909628	0.0503425	TNF/IFNG	2
GO:0030038	GO:0030038	contractile actin filament bundle assembly	2/55	106/18723	0.0388196	0.0909628	0.0503425	RGCC/SDC4	2
GO:0043149	GO:0043149	stress fiber assembly	2/55	106/18723	0.0388196	0.0909628	0.0503425	RGCC/SDC4	2
GO:0000018	GO:0000018	regulation of DNA recombination	2/55	107/18723	0.0394859	0.0920367	0.0509368	IL2/IL4	2
GO:0007229	GO:0007229	integrin-mediated signaling pathway	2/55	107/18723	0.0394859	0.0920367	0.0509368	CD40LG/TIMP1	2
GO:0042303	GO:0042303	molting cycle	2/55	107/18723	0.0394859	0.0920367	0.0509368	PTGS2/TNF	2
GO:0042633	GO:0042633	hair cycle	2/55	107/18723	0.0394859	0.0920367	0.0509368	PTGS2/TNF	2
GO:1903557	GO:1903557	positive regulation of tumor necrosis factor superfamily cytokine production	2/55	107/18723	0.0394859	0.0920367	0.0509368	IFNG/CCL3	2
GO:0098659	GO:0098659	inorganic cation import across plasma membrane	2/55	108/18723	0.0401566	0.0921405	0.0509943	IFNG/PRNP	2
GO:0099587	GO:0099587	inorganic ion import across plasma membrane	2/55	108/18723	0.0401566	0.0921405	0.0509943	IFNG/PRNP	2
GO:0001767	GO:0001767	establishment of lymphocyte polarity	1/55	14/18723	0.0403635	0.0921405	0.0509943	CRTAM	1
GO:0010838	GO:0010838	positive regulation of keratinocyte proliferation	1/55	14/18723	0.0403635	0.0921405	0.0509943	AREG	1
GO:0032688	GO:0032688	negative regulation of interferon-beta production	1/55	14/18723	0.0403635	0.0921405	0.0509943	REL	1
GO:0033212	GO:0033212	iron import into cell	1/55	14/18723	0.0403635	0.0921405	0.0509943	IFNG	1
GO:0035437	GO:0035437	maintenance of protein localization in endoplasmic reticulum	1/55	14/18723	0.0403635	0.0921405	0.0509943	HSPA5	1
GO:0043374	GO:0043374	CD8-positive, alpha-beta T cell differentiation	1/55	14/18723	0.0403635	0.0921405	0.0509943	TNFSF8	1
GO:0045579	GO:0045579	positive regulation of B cell differentiation	1/55	14/18723	0.0403635	0.0921405	0.0509943	IL2	1
GO:0046325	GO:0046325	negative regulation of glucose import	1/55	14/18723	0.0403635	0.0921405	0.0509943	TNF	1
GO:0047484	GO:0047484	regulation of response to osmotic stress	1/55	14/18723	0.0403635	0.0921405	0.0509943	PTGS2	1
GO:0061043	GO:0061043	regulation of vascular wound healing	1/55	14/18723	0.0403635	0.0921405	0.0509943	TNF	1
GO:0070141	GO:0070141	response to UV-A	1/55	14/18723	0.0403635	0.0921405	0.0509943	TIMP1	1
GO:0070278	GO:0070278	extracellular matrix constituent secretion	1/55	14/18723	0.0403635	0.0921405	0.0509943	RGCC	1
GO:0071236	GO:0071236	cellular response to antibiotic	1/55	14/18723	0.0403635	0.0921405	0.0509943	HSPA5	1
GO:0072160	GO:0072160	nephron tubule epithelial cell differentiation	1/55	14/18723	0.0403635	0.0921405	0.0509943	LIF	1
GO:1901722	GO:1901722	regulation of cell proliferation involved in kidney development	1/55	14/18723	0.0403635	0.0921405	0.0509943	MYC	1
GO:1903894	GO:1903894	regulation of IRE1-mediated unfolded protein response	1/55	14/18723	0.0403635	0.0921405	0.0509943	HSPA5	1
GO:1905049	GO:1905049	negative regulation of metallopeptidase activity	1/55	14/18723	0.0403635	0.0921405	0.0509943	TIMP1	1
GO:2001171	GO:2001171	positive regulation of ATP biosynthetic process	1/55	14/18723	0.0403635	0.0921405	0.0509943	IL4	1
GO:0072009	GO:0072009	nephron epithelium development	2/55	109/18723	0.0408316	0.093113	0.0515325	MYC/LIF	2
GO:0090150	GO:0090150	establishment of protein localization to membrane	3/55	260/18723	0.0409315	0.0932445	0.0516053	HSPA5/GZMB/PRNP	3
GO:0009408	GO:0009408	response to heat	2/55	110/18723	0.041511	0.0943703	0.0522284	PTGS2/HSP90AB1	2
GO:1904659	GO:1904659	glucose transmembrane transport	2/55	110/18723	0.041511	0.0943703	0.0522284	TNF/NR4A3	2
GO:0015833	GO:0015833	peptide transport	3/55	264/18723	0.0425113	0.095429	0.0528143	TNF/IFNG/PIM3	3
GO:0051607	GO:0051607	defense response to virus	3/55	265/18723	0.042911	0.095429	0.0528143	IL4/BIRC3/IFNG	3
GO:0140546	GO:0140546	defense response to symbiont	3/55	265/18723	0.042911	0.095429	0.0528143	IL4/BIRC3/IFNG	3
GO:0002836	GO:0002836	positive regulation of response to tumor cell	1/55	15/18723	0.0431846	0.095429	0.0528143	CRTAM	1
GO:0002839	GO:0002839	positive regulation of immune response to tumor cell	1/55	15/18723	0.0431846	0.095429	0.0528143	CRTAM	1
GO:0006878	GO:0006878	cellular copper ion homeostasis	1/55	15/18723	0.0431846	0.095429	0.0528143	PRNP	1
GO:0015671	GO:0015671	oxygen transport	1/55	15/18723	0.0431846	0.095429	0.0528143	MYC	1
GO:0023035	GO:0023035	CD40 signaling pathway	1/55	15/18723	0.0431846	0.095429	0.0528143	CD40LG	1
GO:0042976	GO:0042976	activation of Janus kinase activity	1/55	15/18723	0.0431846	0.095429	0.0528143	IL4	1
GO:0042994	GO:0042994	cytoplasmic sequestering of transcription factor	1/55	15/18723	0.0431846	0.095429	0.0528143	NFKBIA	1
GO:0044406	GO:0044406	adhesion of symbiont to host	1/55	15/18723	0.0431846	0.095429	0.0528143	HSP90AB1	1
GO:0045064	GO:0045064	T-helper 2 cell differentiation	1/55	15/18723	0.0431846	0.095429	0.0528143	IL4	1
GO:0045986	GO:0045986	negative regulation of smooth muscle contraction	1/55	15/18723	0.0431846	0.095429	0.0528143	PTGS2	1
GO:0046321	GO:0046321	positive regulation of fatty acid oxidation	1/55	15/18723	0.0431846	0.095429	0.0528143	NR4A3	1
GO:0051608	GO:0051608	histamine transport	1/55	15/18723	0.0431846	0.095429	0.0528143	CSF2	1
GO:0070885	GO:0070885	negative regulation of calcineurin-NFAT signaling cascade	1/55	15/18723	0.0431846	0.095429	0.0528143	PRNP	1
GO:0070886	GO:0070886	positive regulation of calcineurin-NFAT signaling cascade	1/55	15/18723	0.0431846	0.095429	0.0528143	TNF	1
GO:0072075	GO:0072075	metanephric mesenchyme development	1/55	15/18723	0.0431846	0.095429	0.0528143	MYC	1
GO:0090594	GO:0090594	inflammatory response to wounding	1/55	15/18723	0.0431846	0.095429	0.0528143	TIMP1	1
GO:0099170	GO:0099170	postsynaptic modulation of chemical synaptic transmission	1/55	15/18723	0.0431846	0.095429	0.0528143	RNF19A	1
GO:0106057	GO:0106057	negative regulation of calcineurin-mediated signaling	1/55	15/18723	0.0431846	0.095429	0.0528143	PRNP	1
GO:0106058	GO:0106058	positive regulation of calcineurin-mediated signaling	1/55	15/18723	0.0431846	0.095429	0.0528143	TNF	1
GO:1900102	GO:1900102	negative regulation of endoplasmic reticulum unfolded protein response	1/55	15/18723	0.0431846	0.095429	0.0528143	HSPA5	1
GO:1900153	GO:1900153	positive regulation of nuclear-transcribed mRNA catabolic process, deadenylation-dependent decay	1/55	15/18723	0.0431846	0.095429	0.0528143	ZFP36L1	1
GO:1901741	GO:1901741	positive regulation of myoblast fusion	1/55	15/18723	0.0431846	0.095429	0.0528143	IL4	1
GO:1903799	GO:1903799	negative regulation of production of miRNAs involved in gene silencing by miRNA	1/55	15/18723	0.0431846	0.095429	0.0528143	TNF	1
GO:2000402	GO:2000402	negative regulation of lymphocyte migration	1/55	15/18723	0.0431846	0.095429	0.0528143	CD200	1
GO:2001279	GO:2001279	regulation of unsaturated fatty acid biosynthetic process	1/55	15/18723	0.0431846	0.095429	0.0528143	PTGS2	1
GO:0008645	GO:0008645	hexose transmembrane transport	2/55	114/18723	0.0442709	0.0977319	0.0540888	TNF/NR4A3	2
GO:0009314	GO:0009314	response to radiation	4/55	456/18723	0.0447382	0.0986648	0.0546051	PTGS2/MYC/HSPA5/TIMP1	4
GO:0030278	GO:0030278	regulation of ossification	2/55	115/18723	0.0449714	0.0989818	0.0547806	SRGN/CCL3	2
GO:0043279	GO:0043279	response to alkaloid	2/55	115/18723	0.0449714	0.0989818	0.0547806	HSP90AB1/HSPA5	2
GO:0007346	GO:0007346	regulation of mitotic cell cycle	4/55	457/18723	0.0450375	0.0990289	0.0548066	TNF/RGCC/PIM3/ZFP36L1	4
GO:0015749	GO:0015749	monosaccharide transmembrane transport	2/55	116/18723	0.045676	0.0990717	0.0548303	TNF/NR4A3	2
GO:0021782	GO:0021782	glial cell development	2/55	116/18723	0.045676	0.0990717	0.0548303	TNF/IFNG	2
GO:1990748	GO:1990748	cellular detoxification	2/55	116/18723	0.045676	0.0990717	0.0548303	PRDX1/PTGS2	2
GO:0051962	GO:0051962	positive regulation of nervous system development	3/55	272/18723	0.0457623	0.0990717	0.0548303	TNF/IFNG/LIF	3
GO:0002713	GO:0002713	negative regulation of B cell mediated immunity	1/55	16/18723	0.0459976	0.0990717	0.0548303	CD55	1
GO:0002827	GO:0002827	positive regulation of T-helper 1 type immune response	1/55	16/18723	0.0459976	0.0990717	0.0548303	XCL1	1
GO:0002890	GO:0002890	negative regulation of immunoglobulin mediated immune response	1/55	16/18723	0.0459976	0.0990717	0.0548303	CD55	1
GO:0002921	GO:0002921	negative regulation of humoral immune response	1/55	16/18723	0.0459976	0.0990717	0.0548303	CD55	1
GO:0034116	GO:0034116	positive regulation of heterotypic cell-cell adhesion	1/55	16/18723	0.0459976	0.0990717	0.0548303	TNF	1
GO:0034393	GO:0034393	positive regulation of smooth muscle cell apoptotic process	1/55	16/18723	0.0459976	0.0990717	0.0548303	IFNG	1
GO:0045651	GO:0045651	positive regulation of macrophage differentiation	1/55	16/18723	0.0459976	0.0990717	0.0548303	LIF	1
GO:0051770	GO:0051770	positive regulation of nitric-oxide synthase biosynthetic process	1/55	16/18723	0.0459976	0.0990717	0.0548303	IFNG	1
GO:0060330	GO:0060330	regulation of response to interferon-gamma	1/55	16/18723	0.0459976	0.0990717	0.0548303	HSP90AB1	1
GO:0060334	GO:0060334	regulation of interferon-gamma-mediated signaling pathway	1/55	16/18723	0.0459976	0.0990717	0.0548303	HSP90AB1	1
GO:0070431	GO:0070431	nucleotide-binding oligomerization domain containing 2 signaling pathway	1/55	16/18723	0.0459976	0.0990717	0.0548303	NFKBIA	1
GO:0072283	GO:0072283	metanephric renal vesicle morphogenesis	1/55	16/18723	0.0459976	0.0990717	0.0548303	LIF	1
GO:0090336	GO:0090336	positive regulation of brown fat cell differentiation	1/55	16/18723	0.0459976	0.0990717	0.0548303	PTGS2	1
GO:1901163	GO:1901163	regulation of trophoblast cell migration	1/55	16/18723	0.0459976	0.0990717	0.0548303	TIMP1	1
GO:1901201	GO:1901201	regulation of extracellular matrix assembly	1/55	16/18723	0.0459976	0.0990717	0.0548303	RGCC	1
GO:1904948	GO:1904948	midbrain dopaminergic neuron differentiation	1/55	16/18723	0.0459976	0.0990717	0.0548303	NR4A2	1
GO:2001044	GO:2001044	regulation of integrin-mediated signaling pathway	1/55	16/18723	0.0459976	0.0990717	0.0548303	TIMP1	1
GO:0034249	GO:0034249	negative regulation of cellular amide metabolic process	3/55	273/18723	0.0461772	0.0993618	0.0549909	GZMB/PRNP/ZFP36L1	3
GO:0023061	GO:0023061	signal release	4/55	463/18723	0.0468577	0.100728	0.055747	TNF/IFNG/LIF/PIM3	4
GO:0007613	GO:0007613	memory	2/55	118/18723	0.0470975	0.100851	0.0558153	PTGS2/PRNP	2
GO:0022612	GO:0022612	gland morphogenesis	2/55	118/18723	0.0470975	0.100851	0.0558153	AREG/TNF	2
GO:0034219	GO:0034219	carbohydrate transmembrane transport	2/55	118/18723	0.0470975	0.100851	0.0558153	TNF/NR4A3	2
GO:0045446	GO:0045446	endothelial cell differentiation	2/55	118/18723	0.0470975	0.100851	0.0558153	TNF/KDM6B	2
GO:0031398	GO:0031398	positive regulation of protein ubiquitination	2/55	119/18723	0.0478143	0.102287	0.05661	HSPA5/BIRC3	2
GO:0043542	GO:0043542	endothelial cell migration	3/55	279/18723	0.048706	0.103302	0.0571717	PTGS2/TNF/RGCC	3
GO:0007096	GO:0007096	regulation of exit from mitosis	1/55	17/18723	0.0488024	0.103302	0.0571717	RGCC	1
GO:0042053	GO:0042053	regulation of dopamine metabolic process	1/55	17/18723	0.0488024	0.103302	0.0571717	NR4A2	1
GO:0042069	GO:0042069	regulation of catecholamine metabolic process	1/55	17/18723	0.0488024	0.103302	0.0571717	NR4A2	1
GO:0048532	GO:0048532	anatomical structure arrangement	1/55	17/18723	0.0488024	0.103302	0.0571717	HSPA5	1
GO:0051797	GO:0051797	regulation of hair follicle development	1/55	17/18723	0.0488024	0.103302	0.0571717	TNF	1
GO:0061158	GO:0061158	3'-UTR-mediated mRNA destabilization	1/55	17/18723	0.0488024	0.103302	0.0571717	ZFP36L1	1
GO:0061450	GO:0061450	trophoblast cell migration	1/55	17/18723	0.0488024	0.103302	0.0571717	TIMP1	1
GO:1901550	GO:1901550	regulation of endothelial cell development	1/55	17/18723	0.0488024	0.103302	0.0571717	TNF	1
GO:1903140	GO:1903140	regulation of establishment of endothelial barrier	1/55	17/18723	0.0488024	0.103302	0.0571717	TNF	1
GO:2000696	GO:2000696	regulation of epithelial cell differentiation involved in kidney development	1/55	17/18723	0.0488024	0.103302	0.0571717	LIF	1
GO:0002224	GO:0002224	toll-like receptor signaling pathway	2/55	121/18723	0.0492599	0.103972	0.0575425	BIRC3/NFKBIA	2
GO:0002455	GO:0002455	humoral immune response mediated by circulating immunoglobulin	2/55	121/18723	0.0492599	0.103972	0.0575425	CD55/TNF	2
GO:0042177	GO:0042177	negative regulation of protein catabolic process	2/55	121/18723	0.0492599	0.103972	0.0575425	HSP90AB1/TIMP1	2
GO:0006470	GO:0006470	protein dephosphorylation	3/55	281/18723	0.049564	0.104514	0.0578424	TNF/HSP90AB1/DUSP6	3
GO:0050852	GO:0050852	T cell receptor signaling pathway	2/55	123/18723	0.0507214	0.10677	0.059091	PRNP/NFKBID	2
GO:0072659	GO:0072659	protein localization to plasma membrane	3/55	284/18723	0.0508648	0.10677	0.059091	TNF/IFNG/PRNP	3
GO:0010508	GO:0010508	positive regulation of autophagy	2/55	124/18723	0.051458	0.10677	0.059091	IL4/IFNG	2
GO:0097237	GO:0097237	cellular response to toxic substance	2/55	124/18723	0.051458	0.10677	0.059091	PRDX1/PTGS2	2
GO:0030728	GO:0030728	ovulation	1/55	18/18723	0.0515992	0.10677	0.059091	PTGS2	1
GO:0030730	GO:0030730	sequestering of triglyceride	1/55	18/18723	0.0515992	0.10677	0.059091	TNF	1
GO:0036499	GO:0036499	PERK-mediated unfolded protein response	1/55	18/18723	0.0515992	0.10677	0.059091	HSPA5	1
GO:0045187	GO:0045187	regulation of circadian sleep/wake cycle, sleep	1/55	18/18723	0.0515992	0.10677	0.059091	CSF2	1
GO:0051447	GO:0051447	negative regulation of meiotic cell cycle	1/55	18/18723	0.0515992	0.10677	0.059091	LIF	1
GO:0051782	GO:0051782	negative regulation of cell division	1/55	18/18723	0.0515992	0.10677	0.059091	MYC	1
GO:0055070	GO:0055070	copper ion homeostasis	1/55	18/18723	0.0515992	0.10677	0.059091	PRNP	1
GO:0060546	GO:0060546	negative regulation of necroptotic process	1/55	18/18723	0.0515992	0.10677	0.059091	BIRC3	1
GO:0060602	GO:0060602	branch elongation of an epithelium	1/55	18/18723	0.0515992	0.10677	0.059091	AREG	1
GO:0060749	GO:0060749	mammary gland alveolus development	1/55	18/18723	0.0515992	0.10677	0.059091	AREG	1
GO:0061377	GO:0061377	mammary gland lobule development	1/55	18/18723	0.0515992	0.10677	0.059091	AREG	1
GO:0071318	GO:0071318	cellular response to ATP	1/55	18/18723	0.0515992	0.10677	0.059091	PTGS2	1
GO:0072234	GO:0072234	metanephric nephron tubule development	1/55	18/18723	0.0515992	0.10677	0.059091	LIF	1
GO:0097709	GO:0097709	connective tissue replacement	1/55	18/18723	0.0515992	0.10677	0.059091	TIMP1	1
GO:1900151	GO:1900151	regulation of nuclear-transcribed mRNA catabolic process, deadenylation-dependent decay	1/55	18/18723	0.0515992	0.10677	0.059091	ZFP36L1	1
GO:1902074	GO:1902074	response to salt	1/55	18/18723	0.0515992	0.10677	0.059091	HSPA5	1
GO:0097193	GO:0097193	intrinsic apoptotic signaling pathway	3/55	288/18723	0.0526251	0.108791	0.0602095	PTGS2/TNF/BCL2A1	3
GO:0032874	GO:0032874	positive regulation of stress-activated MAPK cascade	2/55	126/18723	0.0529428	0.109346	0.0605164	TNF/GADD45B	2
GO:0071375	GO:0071375	cellular response to peptide hormone stimulus	3/55	290/18723	0.0535163	0.10998	0.0608671	NR4A2/NR4A3/ZFP36L1	3
GO:0051224	GO:0051224	negative regulation of protein transport	2/55	127/18723	0.0536909	0.10998	0.0608671	CD200/PIM3	2
GO:0002429	GO:0002429	immune response-activating cell surface receptor signaling pathway	3/55	291/18723	0.0539647	0.10998	0.0608671	NR4A3/PRNP/NFKBID	3
GO:0002757	GO:0002757	immune response-activating signal transduction	3/55	291/18723	0.0539647	0.10998	0.0608671	NR4A3/PRNP/NFKBID	3
GO:0060485	GO:0060485	mesenchyme development	3/55	291/18723	0.0539647	0.10998	0.0608671	MYC/RGCC/ZFP36L1	3
GO:0002281	GO:0002281	macrophage activation involved in immune response	1/55	19/18723	0.0543878	0.10998	0.0608671	IFNG	1
GO:0002902	GO:0002902	regulation of B cell apoptotic process	1/55	19/18723	0.0543878	0.10998	0.0608671	IL2	1
GO:0010744	GO:0010744	positive regulation of macrophage derived foam cell differentiation	1/55	19/18723	0.0543878	0.10998	0.0608671	CSF2	1
GO:0010829	GO:0010829	negative regulation of glucose transmembrane transport	1/55	19/18723	0.0543878	0.10998	0.0608671	TNF	1
GO:0032616	GO:0032616	interleukin-13 production	1/55	19/18723	0.0543878	0.10998	0.0608671	IL4	1
GO:0032656	GO:0032656	regulation of interleukin-13 production	1/55	19/18723	0.0543878	0.10998	0.0608671	IL4	1
GO:0036498	GO:0036498	IRE1-mediated unfolded protein response	1/55	19/18723	0.0543878	0.10998	0.0608671	HSPA5	1
GO:0044320	GO:0044320	cellular response to leptin stimulus	1/55	19/18723	0.0543878	0.10998	0.0608671	NR4A3	1
GO:0045821	GO:0045821	positive regulation of glycolytic process	1/55	19/18723	0.0543878	0.10998	0.0608671	IFNG	1
GO:0062099	GO:0062099	negative regulation of programmed necrotic cell death	1/55	19/18723	0.0543878	0.10998	0.0608671	BIRC3	1
GO:0072074	GO:0072074	kidney mesenchyme development	1/55	19/18723	0.0543878	0.10998	0.0608671	MYC	1
GO:0072077	GO:0072077	renal vesicle morphogenesis	1/55	19/18723	0.0543878	0.10998	0.0608671	LIF	1
GO:0097501	GO:0097501	stress response to metal ion	1/55	19/18723	0.0543878	0.10998	0.0608671	HSPA5	1
GO:1901739	GO:1901739	regulation of myoblast fusion	1/55	19/18723	0.0543878	0.10998	0.0608671	IL4	1
GO:1903204	GO:1903204	negative regulation of oxidative stress-induced neuron death	1/55	19/18723	0.0543878	0.10998	0.0608671	NR4A3	1
GO:1903975	GO:1903975	regulation of glial cell migration	1/55	19/18723	0.0543878	0.10998	0.0608671	CCL3	1
GO:1903978	GO:1903978	regulation of microglial cell activation	1/55	19/18723	0.0543878	0.10998	0.0608671	CCL3	1
GO:0017015	GO:0017015	regulation of transforming growth factor beta receptor signaling pathway	2/55	128/18723	0.0544428	0.10998	0.0608671	HSP90AB1/HSPA5	2
GO:0070304	GO:0070304	positive regulation of stress-activated protein kinase signaling cascade	2/55	128/18723	0.0544428	0.10998	0.0608671	TNF/GADD45B	2
GO:0001822	GO:0001822	kidney development	3/55	293/18723	0.0548669	0.110735	0.0612852	MYC/SDC4/LIF	3
GO:0007498	GO:0007498	mesoderm development	2/55	129/18723	0.0551985	0.1111	0.0614874	KDM6B/ZFP36L1	2
GO:0034101	GO:0034101	erythrocyte homeostasis	2/55	129/18723	0.0551985	0.1111	0.0614874	PRDX1/ZFP36L1	2
GO:0043280	GO:0043280	positive regulation of cysteine-type endopeptidase activity involved in apoptotic process	2/55	129/18723	0.0551985	0.1111	0.0614874	TNF/MYC	2
GO:0010948	GO:0010948	negative regulation of cell cycle process	3/55	294/18723	0.0553207	0.111245	0.0615675	RGCC/LIF/ZFP36L1	3
GO:0006091	GO:0006091	generation of precursor metabolites and energy	4/55	490/18723	0.0555537	0.111612	0.0617705	IL4/MYC/NR4A3/IFNG	4
GO:0034765	GO:0034765	regulation of ion transmembrane transport	4/55	491/18723	0.0558916	0.112119	0.062051	XCL1/IL13/IFNG/PRNP	4
GO:0006956	GO:0006956	complement activation	2/55	130/18723	0.0559579	0.112119	0.062051	CD55/RGCC	2
GO:0043467	GO:0043467	regulation of generation of precursor metabolites and energy	2/55	130/18723	0.0559579	0.112119	0.062051	IL4/IFNG	2
GO:0050890	GO:0050890	cognition	3/55	296/18723	0.0562338	0.112306	0.0621547	PTGS2/TNF/PRNP	3
GO:0000723	GO:0000723	telomere maintenance	2/55	131/18723	0.0567211	0.112306	0.0621547	HSP90AB1/MYC	2
GO:0006612	GO:0006612	protein targeting to membrane	2/55	131/18723	0.0567211	0.112306	0.0621547	HSPA5/PRNP	2
GO:0019827	GO:0019827	stem cell population maintenance	2/55	131/18723	0.0567211	0.112306	0.0621547	MYC/LIF	2
GO:1904950	GO:1904950	negative regulation of establishment of protein localization	2/55	131/18723	0.0567211	0.112306	0.0621547	CD200/PIM3	2
GO:0010720	GO:0010720	positive regulation of cell development	3/55	298/18723	0.0571542	0.112306	0.0621547	TNF/IFNG/LIF	3
GO:0048511	GO:0048511	rhythmic process	3/55	298/18723	0.0571542	0.112306	0.0621547	CSF2/HSPA5/CREM	3
GO:0002834	GO:0002834	regulation of response to tumor cell	1/55	20/18723	0.0571685	0.112306	0.0621547	CRTAM	1
GO:0002837	GO:0002837	regulation of immune response to tumor cell	1/55	20/18723	0.0571685	0.112306	0.0621547	CRTAM	1
GO:0009713	GO:0009713	catechol-containing compound biosynthetic process	1/55	20/18723	0.0571685	0.112306	0.0621547	NR4A2	1
GO:0015669	GO:0015669	gas transport	1/55	20/18723	0.0571685	0.112306	0.0621547	MYC	1
GO:0032495	GO:0032495	response to muramyl dipeptide	1/55	20/18723	0.0571685	0.112306	0.0621547	NFKBIA	1
GO:0032793	GO:0032793	positive regulation of CREB transcription factor activity	1/55	20/18723	0.0571685	0.112306	0.0621547	CD200	1
GO:0032986	GO:0032986	protein-DNA complex disassembly	1/55	20/18723	0.0571685	0.112306	0.0621547	MYC	1
GO:0039535	GO:0039535	regulation of RIG-I signaling pathway	1/55	20/18723	0.0571685	0.112306	0.0621547	BIRC3	1
GO:0042423	GO:0042423	catecholamine biosynthetic process	1/55	20/18723	0.0571685	0.112306	0.0621547	NR4A2	1
GO:0060231	GO:0060231	mesenchymal to epithelial transition	1/55	20/18723	0.0571685	0.112306	0.0621547	LIF	1
GO:0060252	GO:0060252	positive regulation of glial cell proliferation	1/55	20/18723	0.0571685	0.112306	0.0621547	TNF	1
GO:0072087	GO:0072087	renal vesicle development	1/55	20/18723	0.0571685	0.112306	0.0621547	LIF	1
GO:0072567	GO:0072567	chemokine (C-X-C motif) ligand 2 production	1/55	20/18723	0.0571685	0.112306	0.0621547	TNF	1
GO:1903206	GO:1903206	negative regulation of hydrogen peroxide-induced cell death	1/55	20/18723	0.0571685	0.112306	0.0621547	NR4A3	1
GO:2000341	GO:2000341	regulation of chemokine (C-X-C motif) ligand 2 production	1/55	20/18723	0.0571685	0.112306	0.0621547	TNF	1
GO:0045667	GO:0045667	regulation of osteoblast differentiation	2/55	132/18723	0.0574879	0.112833	0.0624465	AREG/TNF	2
GO:0010565	GO:0010565	regulation of cellular ketone metabolic process	2/55	133/18723	0.0582583	0.114143	0.0631713	PTGS2/NR4A3	2
GO:0046328	GO:0046328	regulation of JNK cascade	2/55	133/18723	0.0582583	0.114143	0.0631713	TNF/GADD45B	2
GO:0042886	GO:0042886	amide transport	3/55	301/18723	0.0585483	0.11461	0.0634296	TNF/IFNG/PIM3	3
GO:0072001	GO:0072001	renal system development	3/55	302/18723	0.0590166	0.11483	0.0635514	MYC/SDC4/LIF	3
GO:0032434	GO:0032434	regulation of proteasomal ubiquitin-dependent protein catabolic process	2/55	134/18723	0.0590324	0.11483	0.0635514	HSP90AB1/RNF19A	2
GO:0098727	GO:0098727	maintenance of cell number	2/55	134/18723	0.0590324	0.11483	0.0635514	MYC/LIF	2
GO:0007252	GO:0007252	I-kappaB phosphorylation	1/55	21/18723	0.059941	0.11483	0.0635514	TNF	1
GO:0030449	GO:0030449	regulation of complement activation	1/55	21/18723	0.059941	0.11483	0.0635514	CD55	1
GO:0032516	GO:0032516	positive regulation of phosphoprotein phosphatase activity	1/55	21/18723	0.059941	0.11483	0.0635514	HSP90AB1	1
GO:0033630	GO:0033630	positive regulation of cell adhesion mediated by integrin	1/55	21/18723	0.059941	0.11483	0.0635514	LIF	1
GO:0043576	GO:0043576	regulation of respiratory gaseous exchange	1/55	21/18723	0.059941	0.11483	0.0635514	NR4A2	1
GO:0044342	GO:0044342	type B pancreatic cell proliferation	1/55	21/18723	0.059941	0.11483	0.0635514	NR4A3	1
GO:0050802	GO:0050802	circadian sleep/wake cycle, sleep	1/55	21/18723	0.059941	0.11483	0.0635514	CSF2	1
[truncated: 1,072 more rows]

## Sheet: Cluster_CTLs-up_go
	ID	Description	GeneRatio	BgRatio	pvalue	p.adjust	qvalue	geneID	Count
[truncated: 1,297 more rows]

## Sheet: ClusterCTL1_up_go
	ID	Description	GeneRatio	BgRatio	pvalue	p.adjust	qvalue	geneID	Count
[truncated: 1,072 more rows]

[truncated: 3 more sheets: ClusterCTL2_up_go, ClusterCTL3_up_go, ClusterCTL4_up_go]
